# Supplementary material for: Changes in the Control of the Hypothalamic-Pituitary Gonadal Axis Across Three Differentially Selected Strains of Laying Hens (Gallus gallus domesticus)
Source: PubMed Central journal article supplement (PMC8027345; doi:10.3389/fphys.2021.651491), 2021-03-25

**Supplemental Figure 1.** Individual Estradiol (E<sub>2</sub>) profiles from 12 to 100 weeks of age (woa) presented as a plasma concentration (pg/μL). Each figure is labelled with the strain and ID number of the hen.

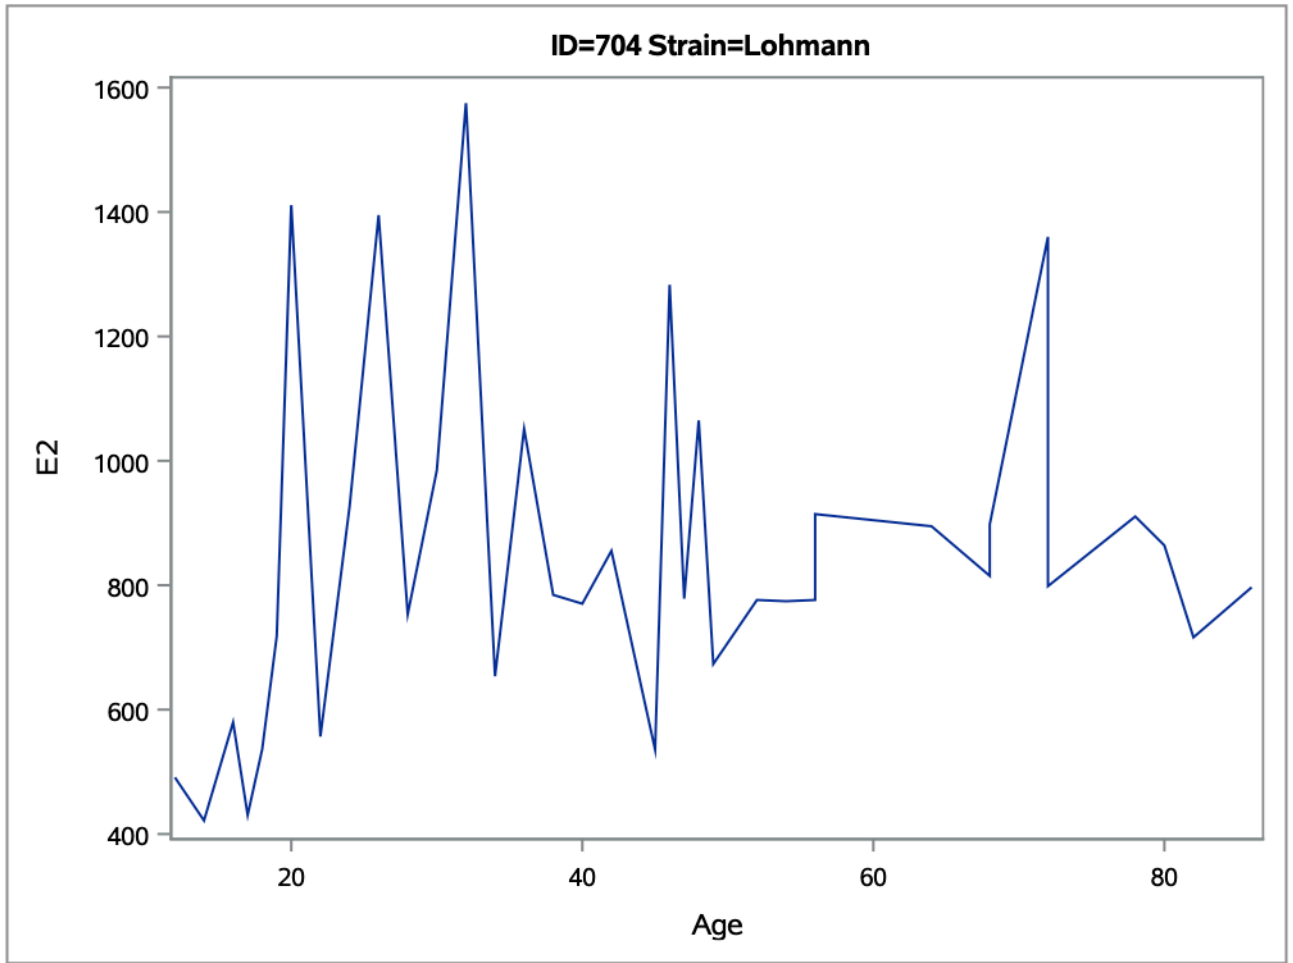

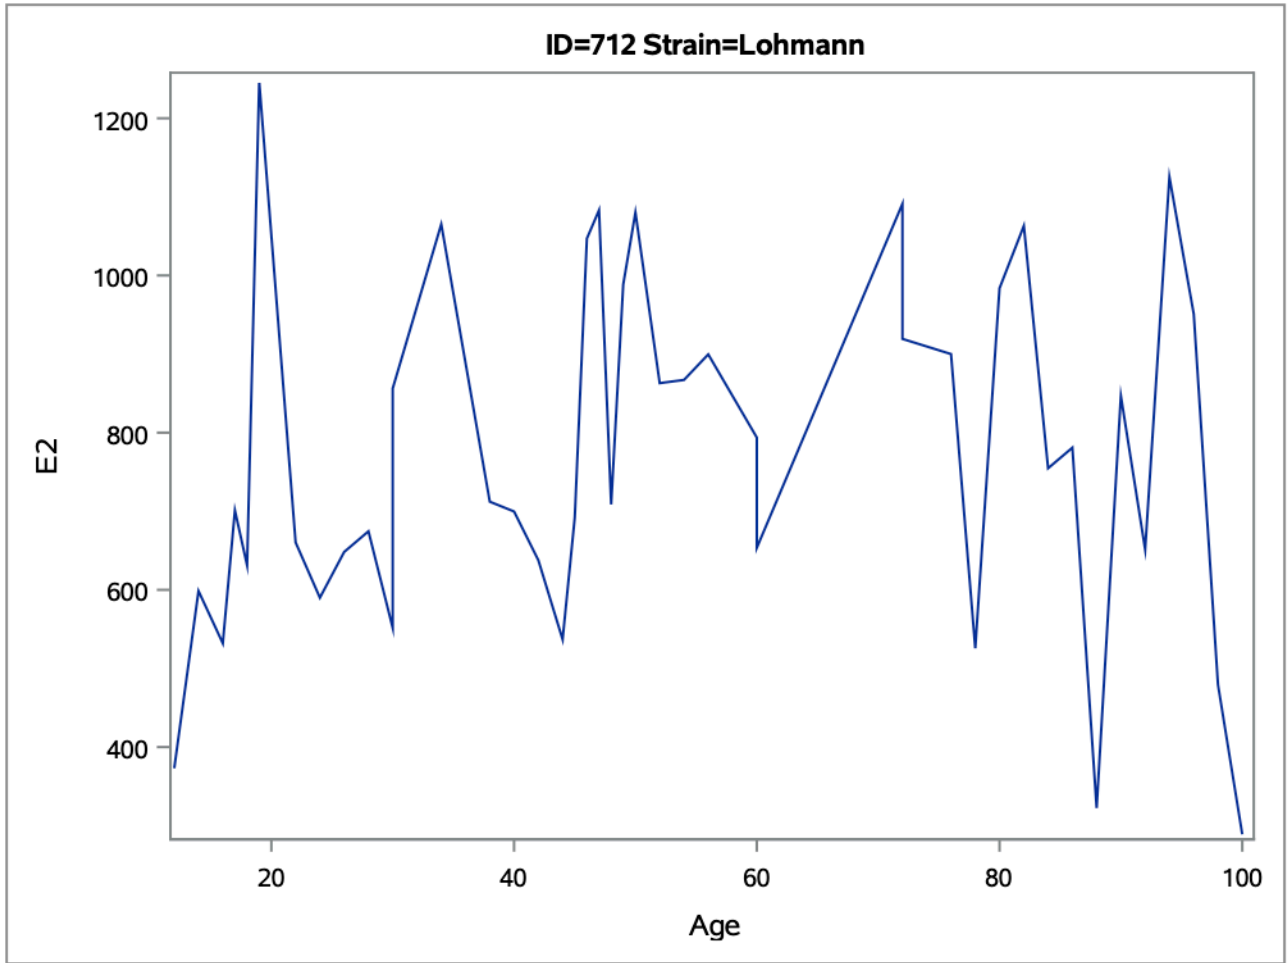

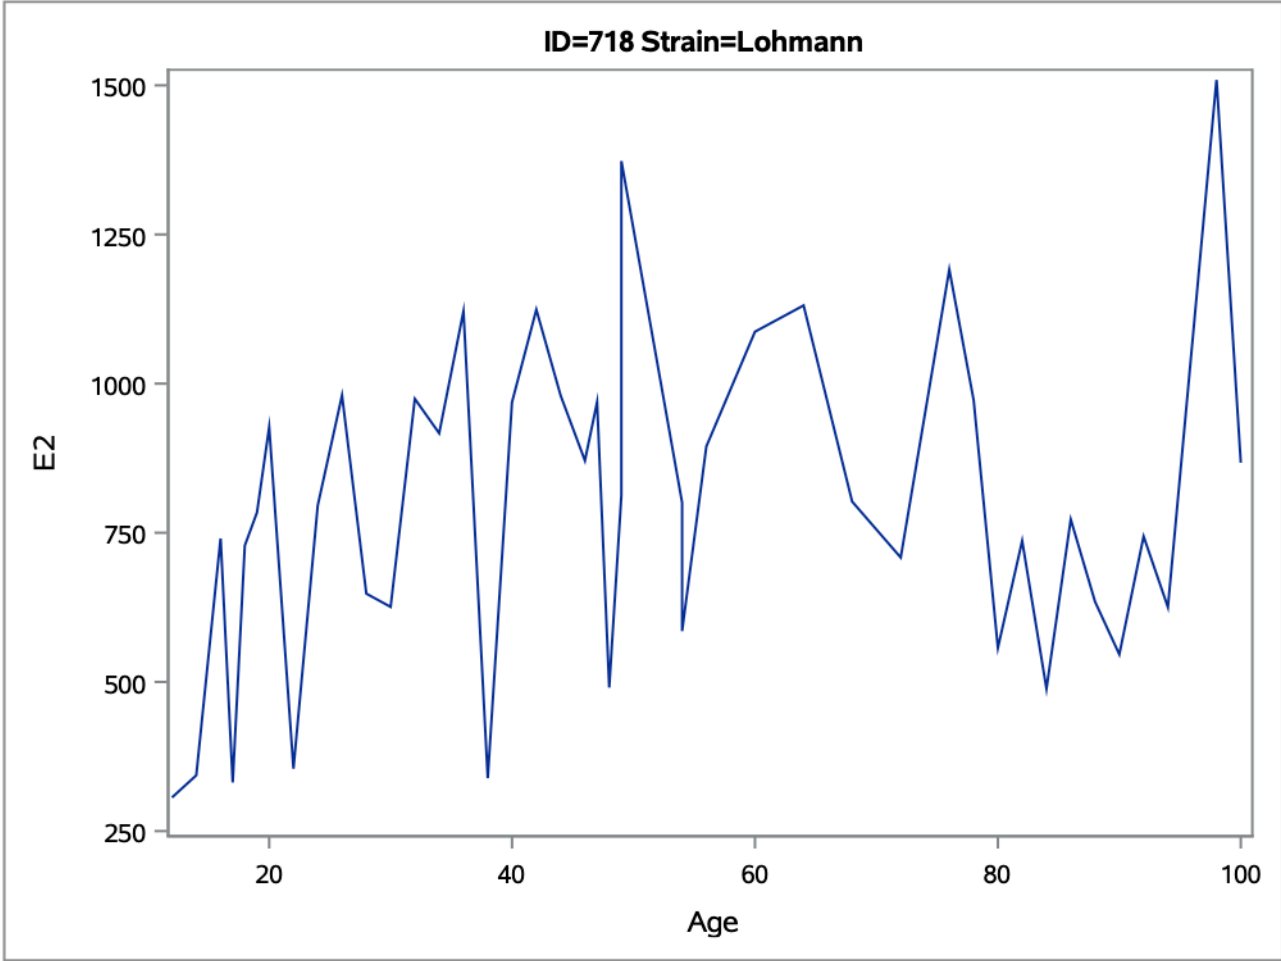

ID=719 Strain=Lohmann

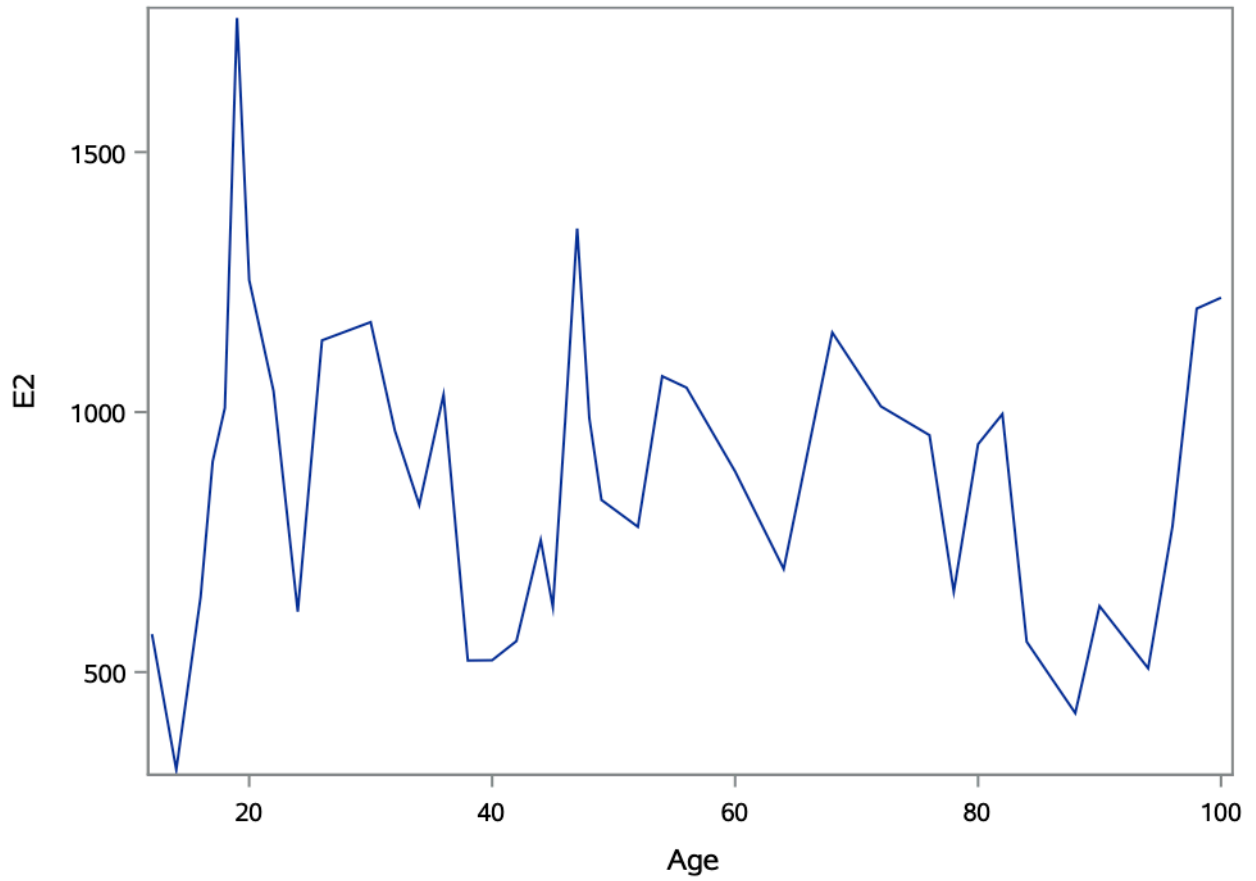

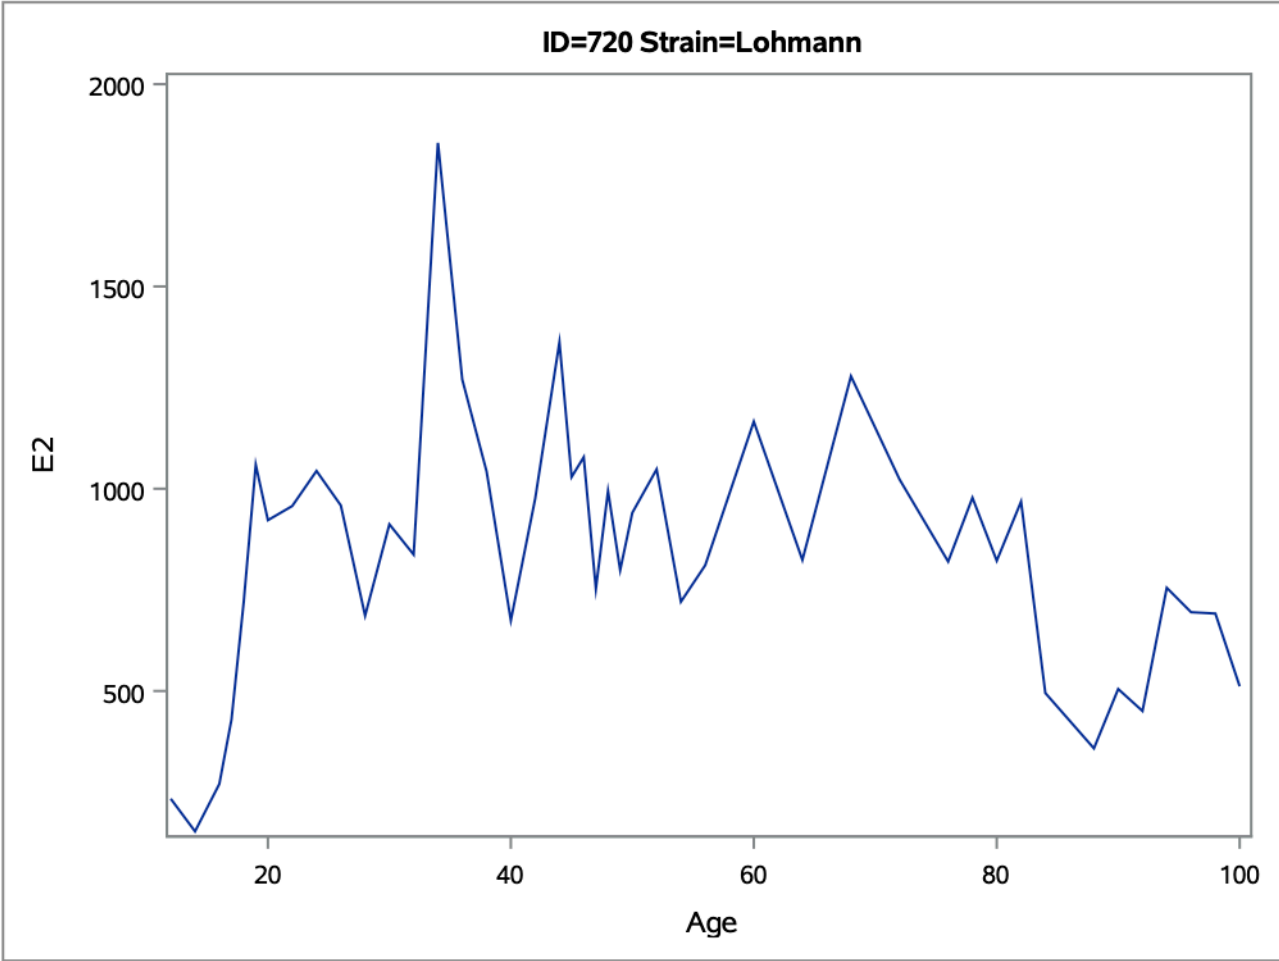

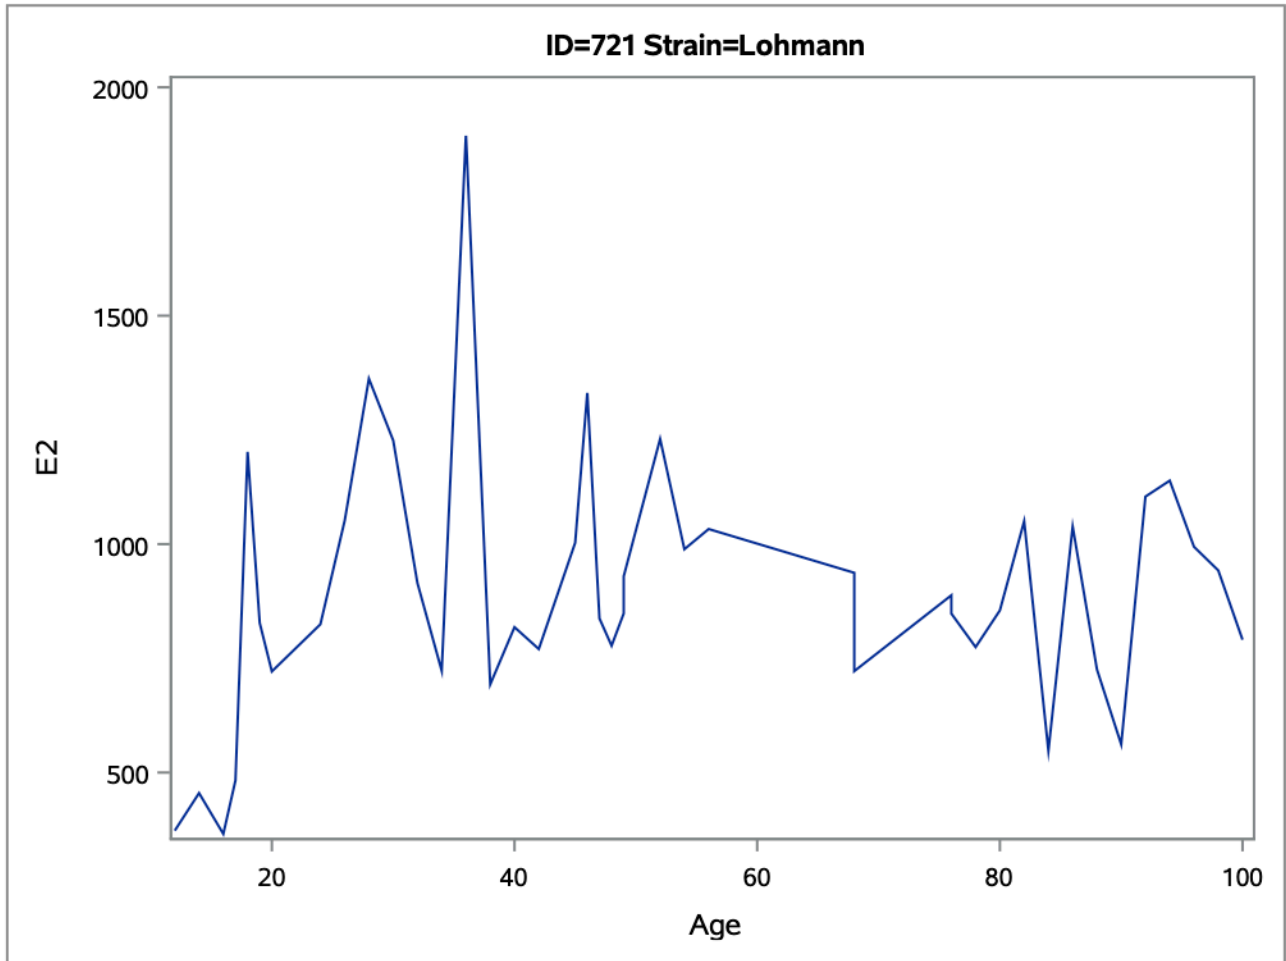

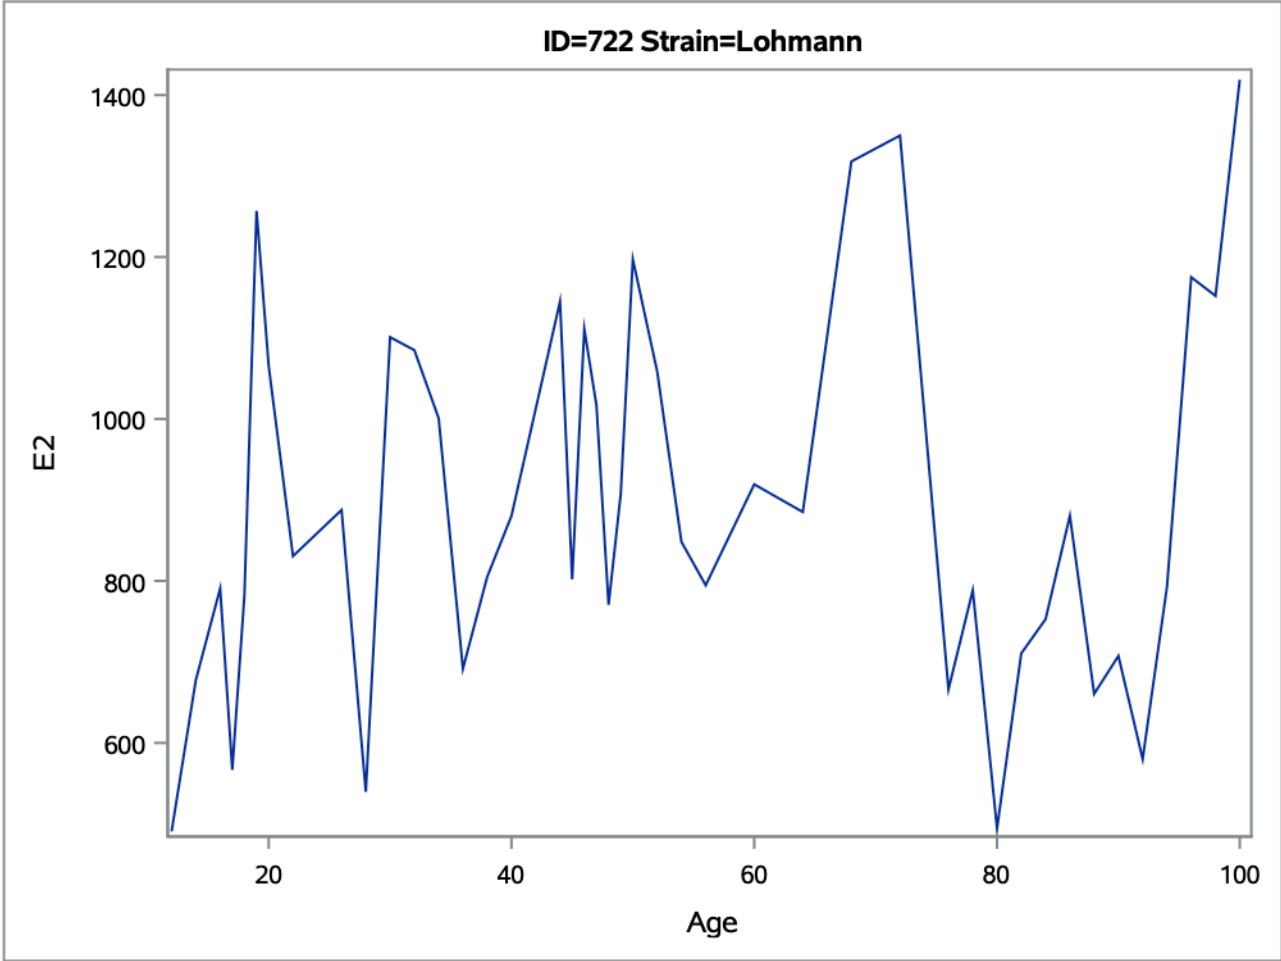



ID=724 Strain=Lohmann

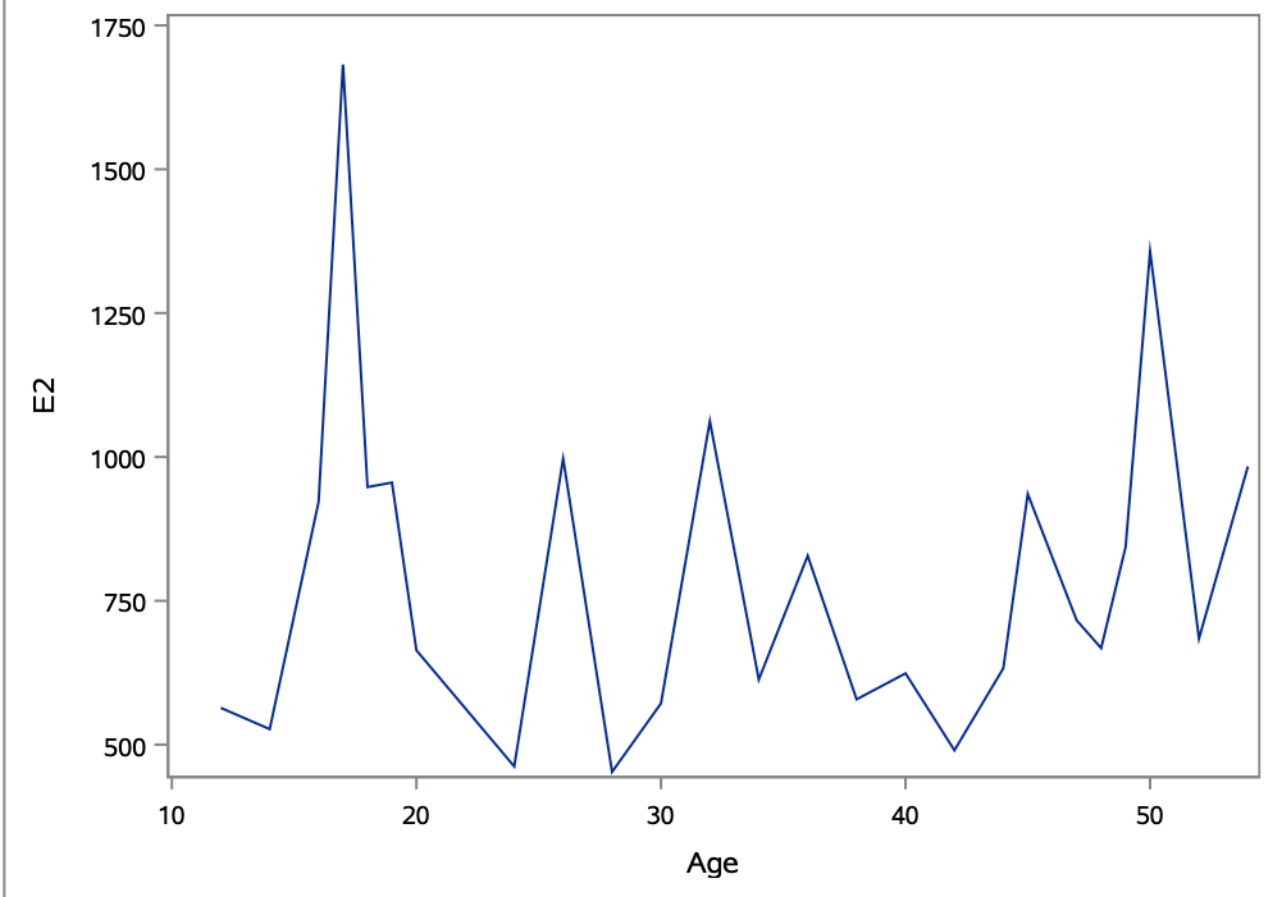

ID=725 Strain=Lohmann

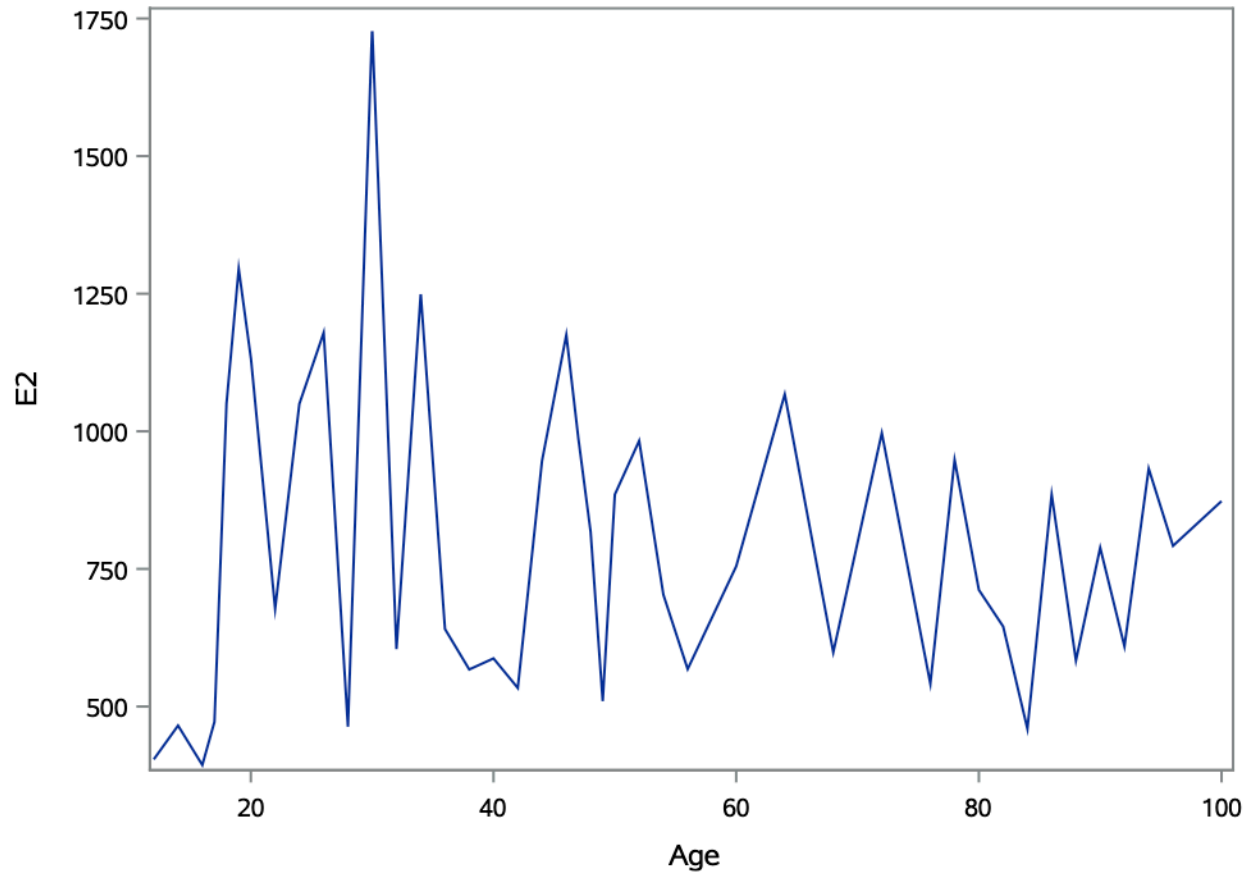

ID=726 Strain=Lohmann

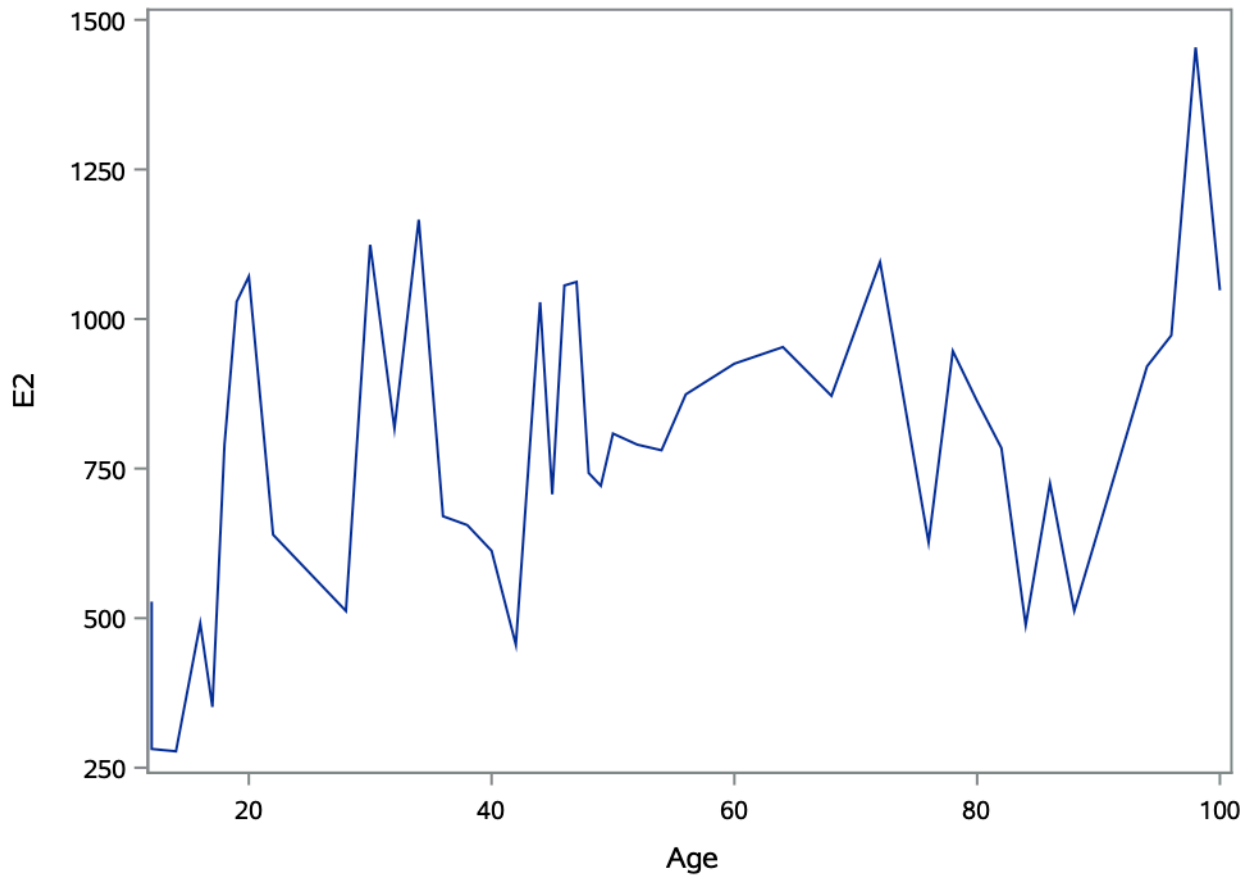

ID=727 Strain=Lohmann

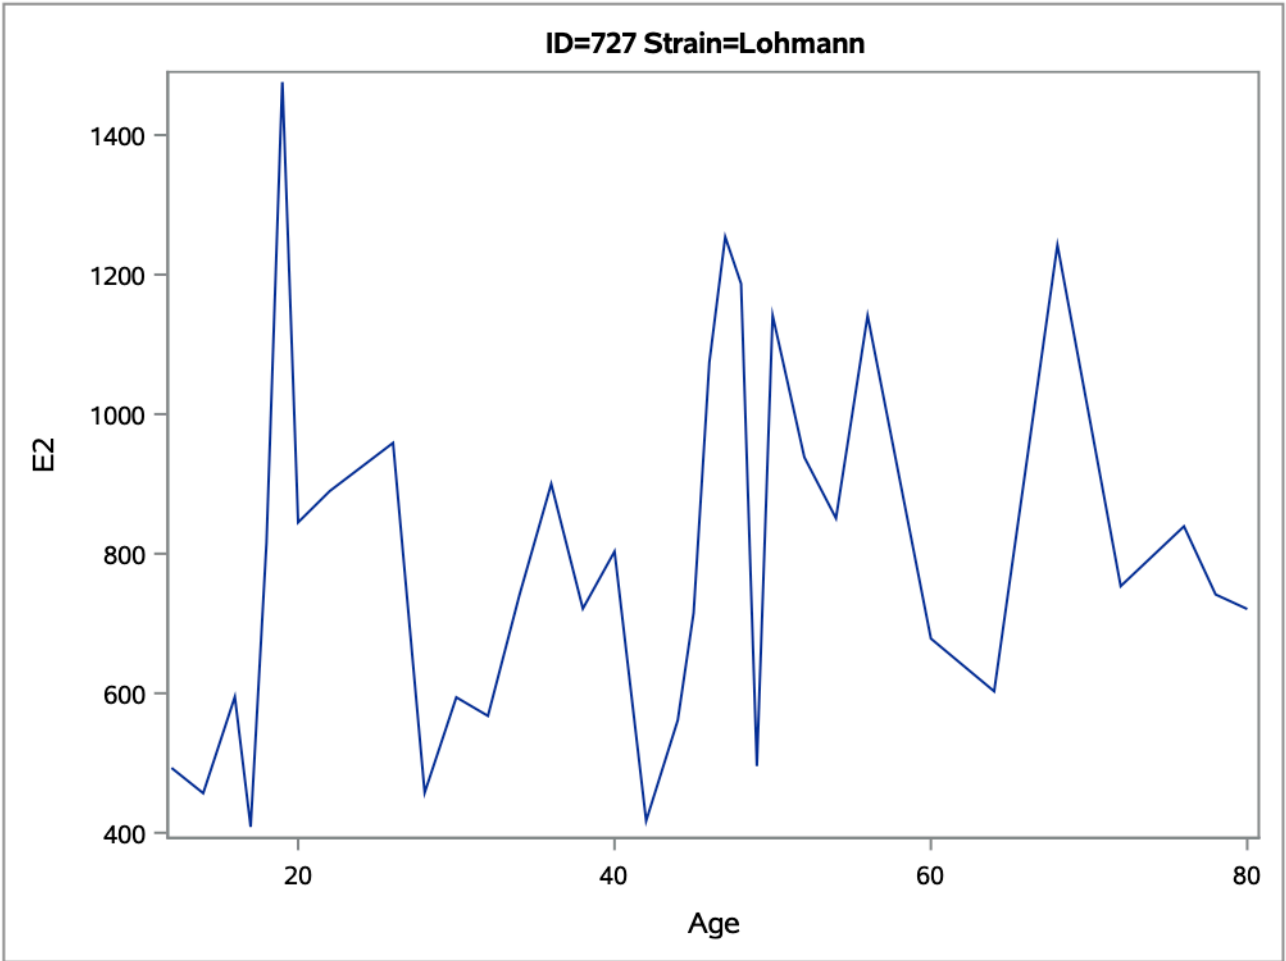

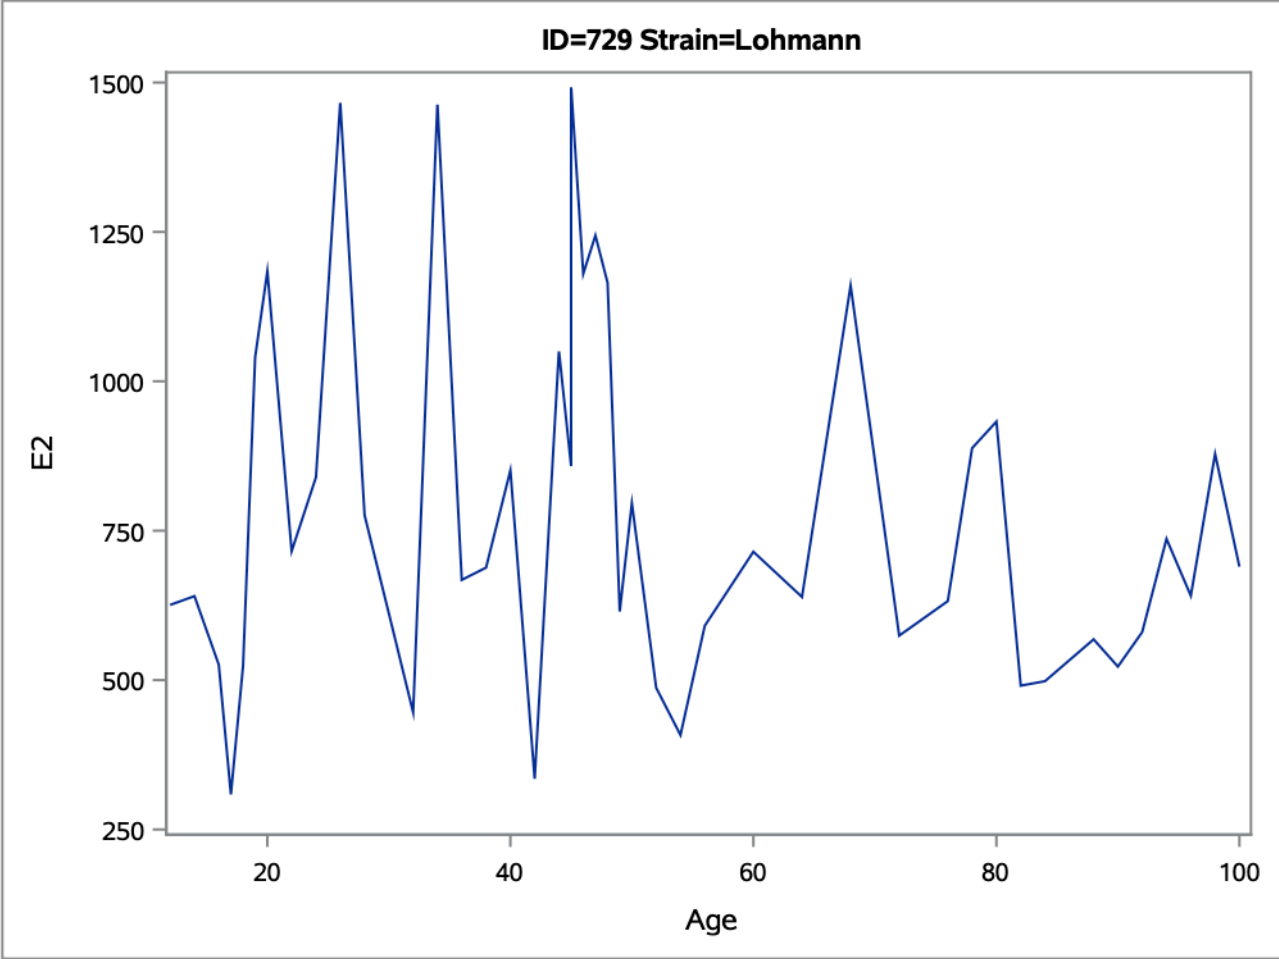

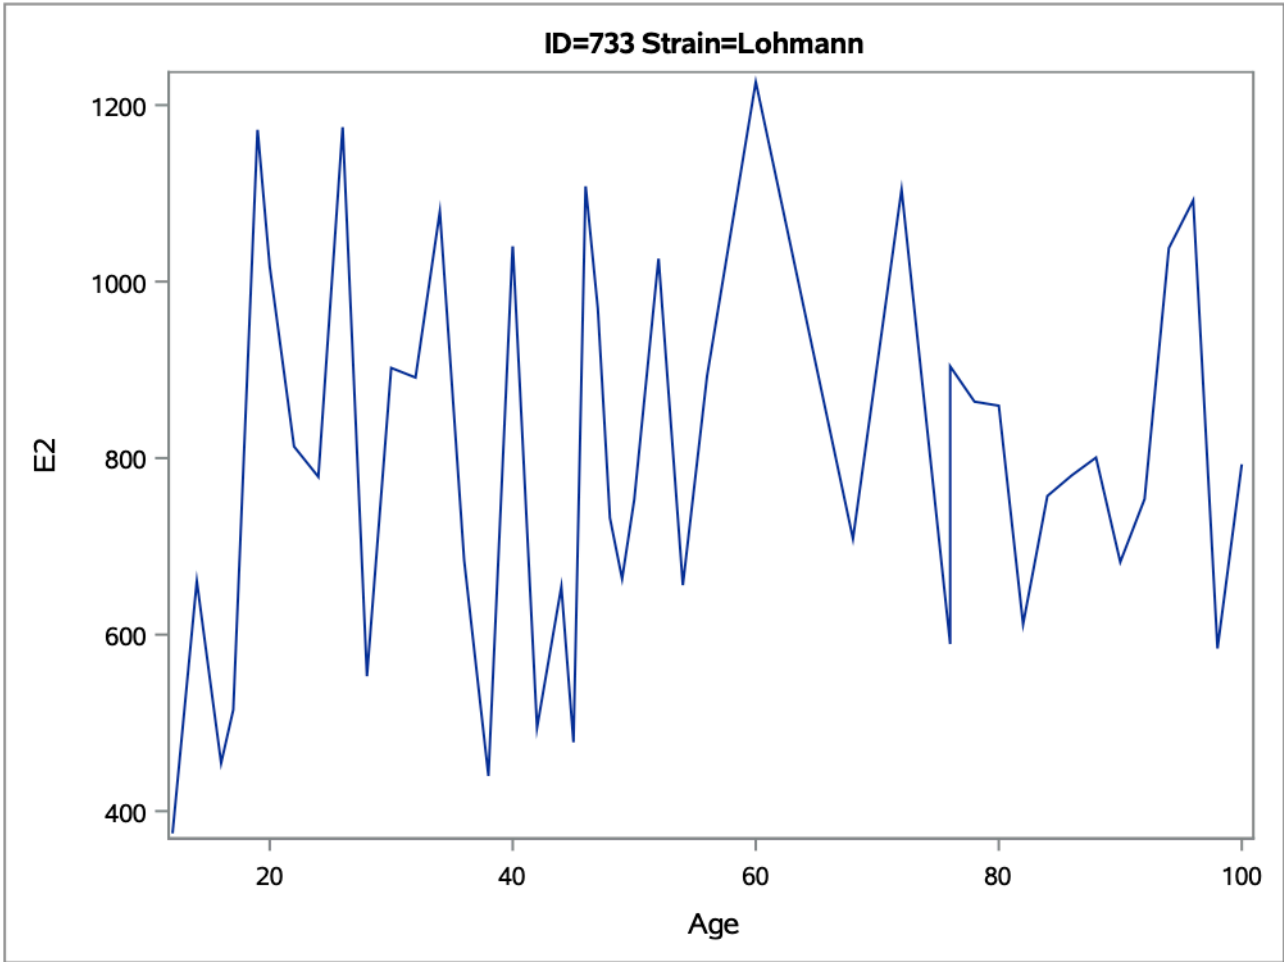

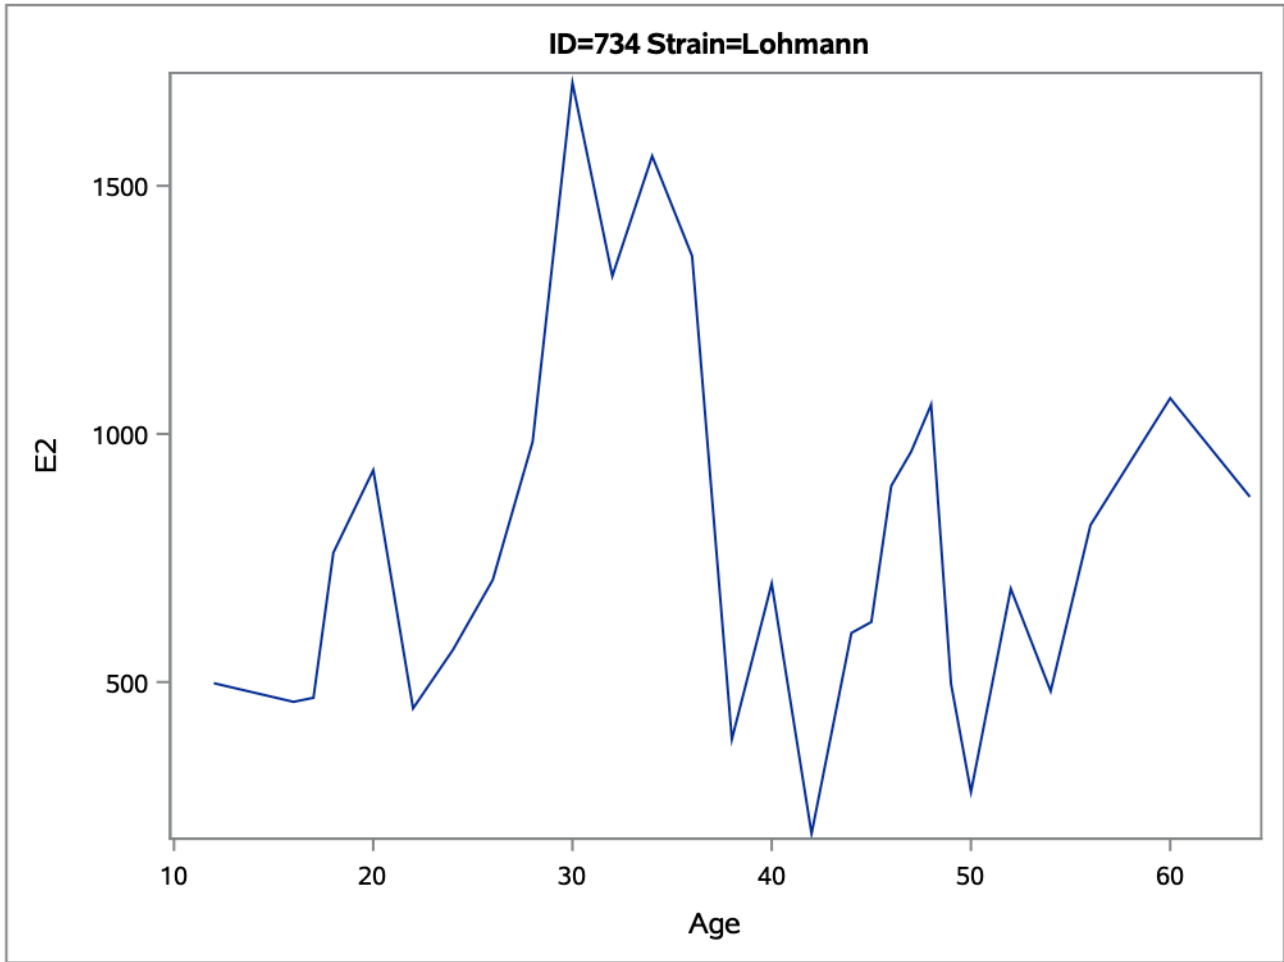

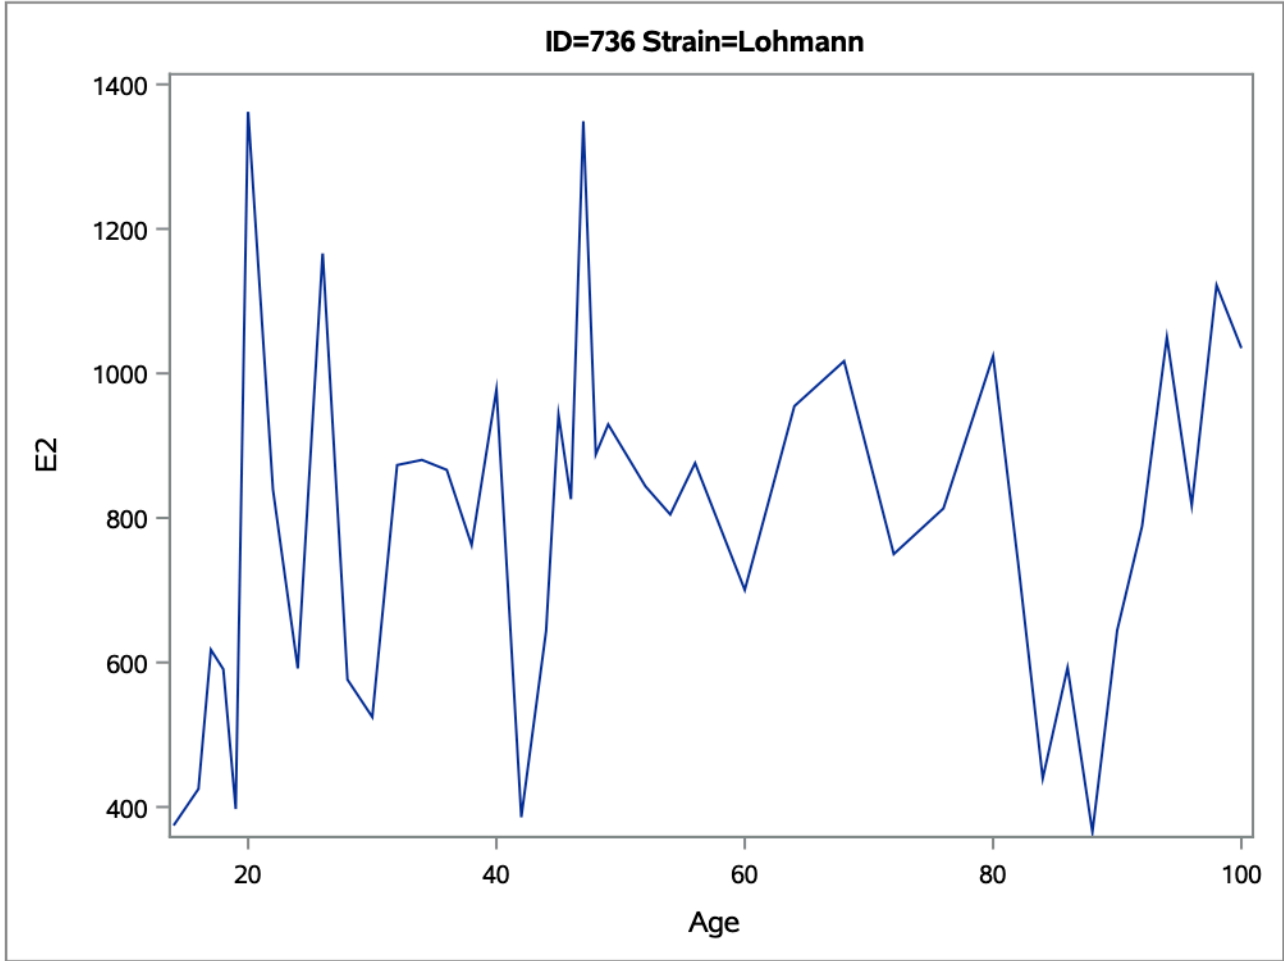



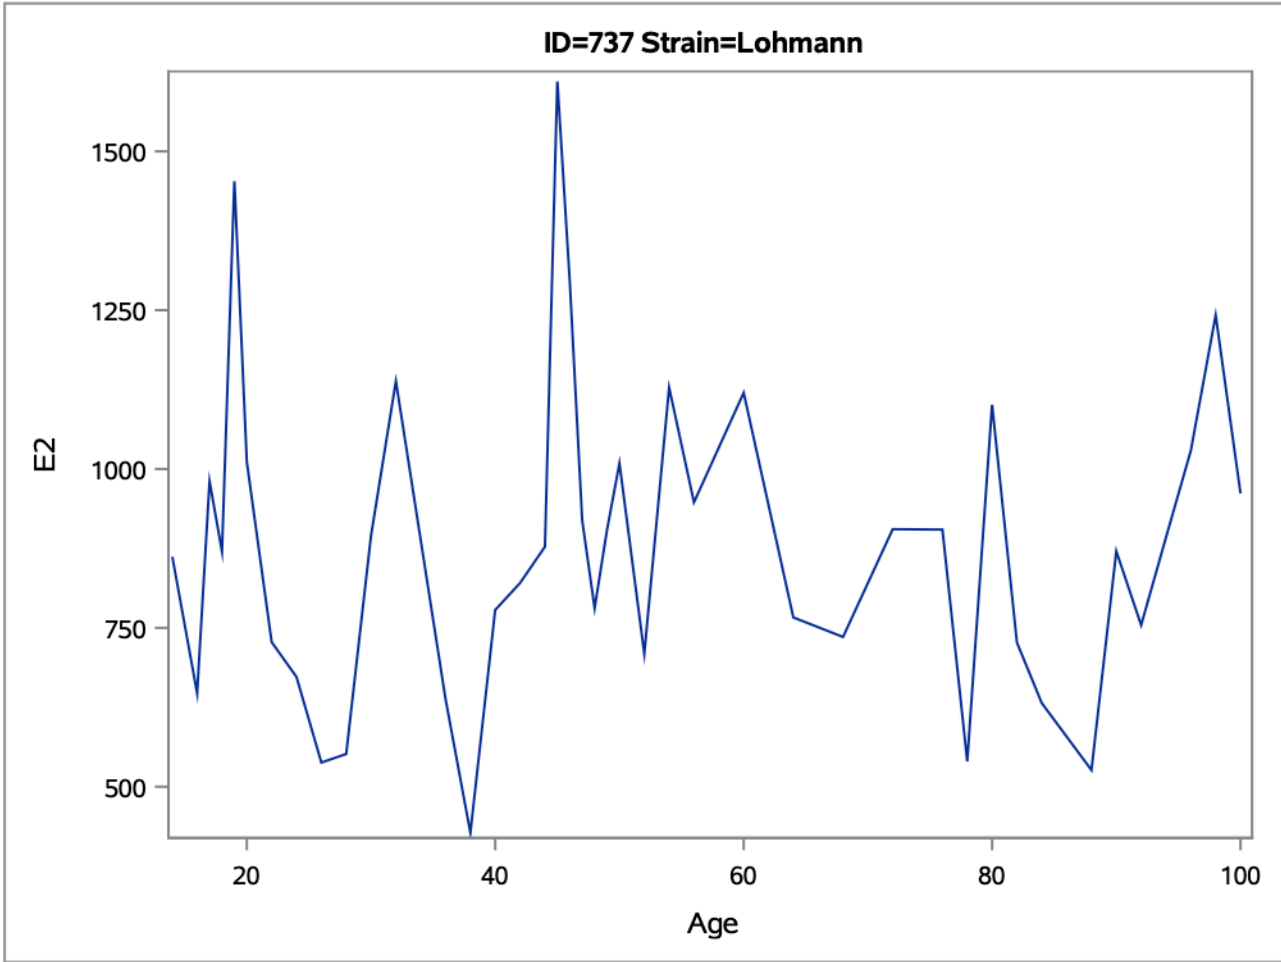

ID=738 Strain=Lohmann

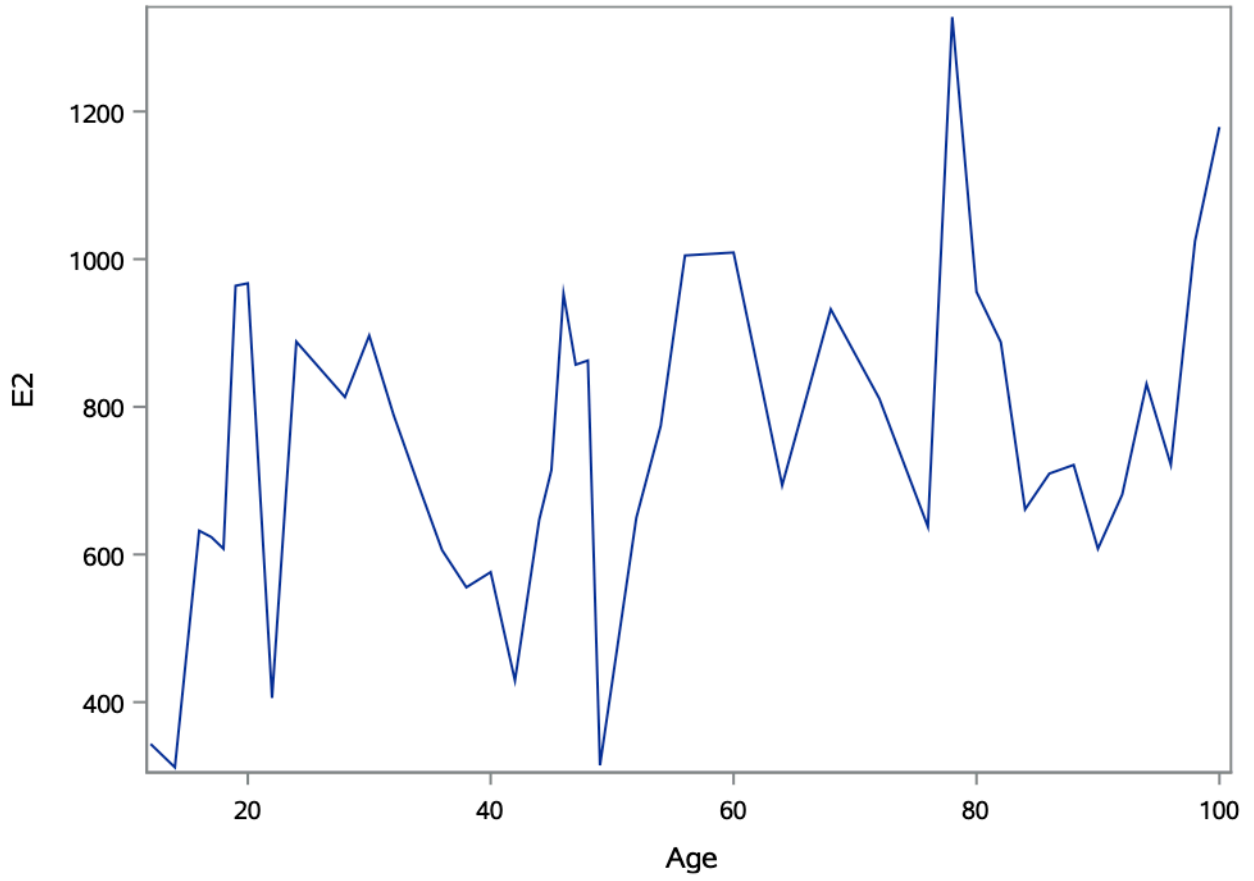

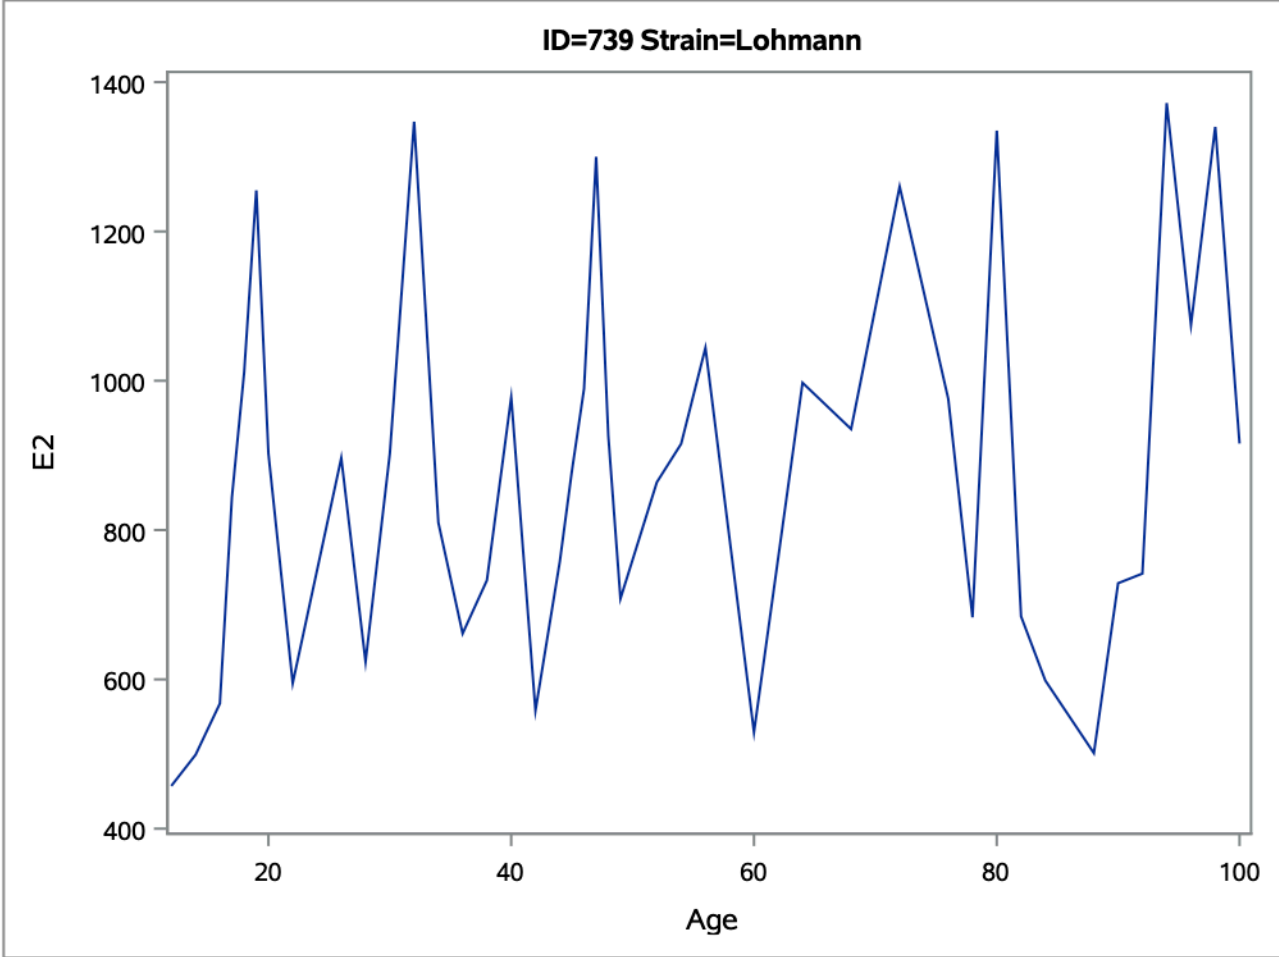

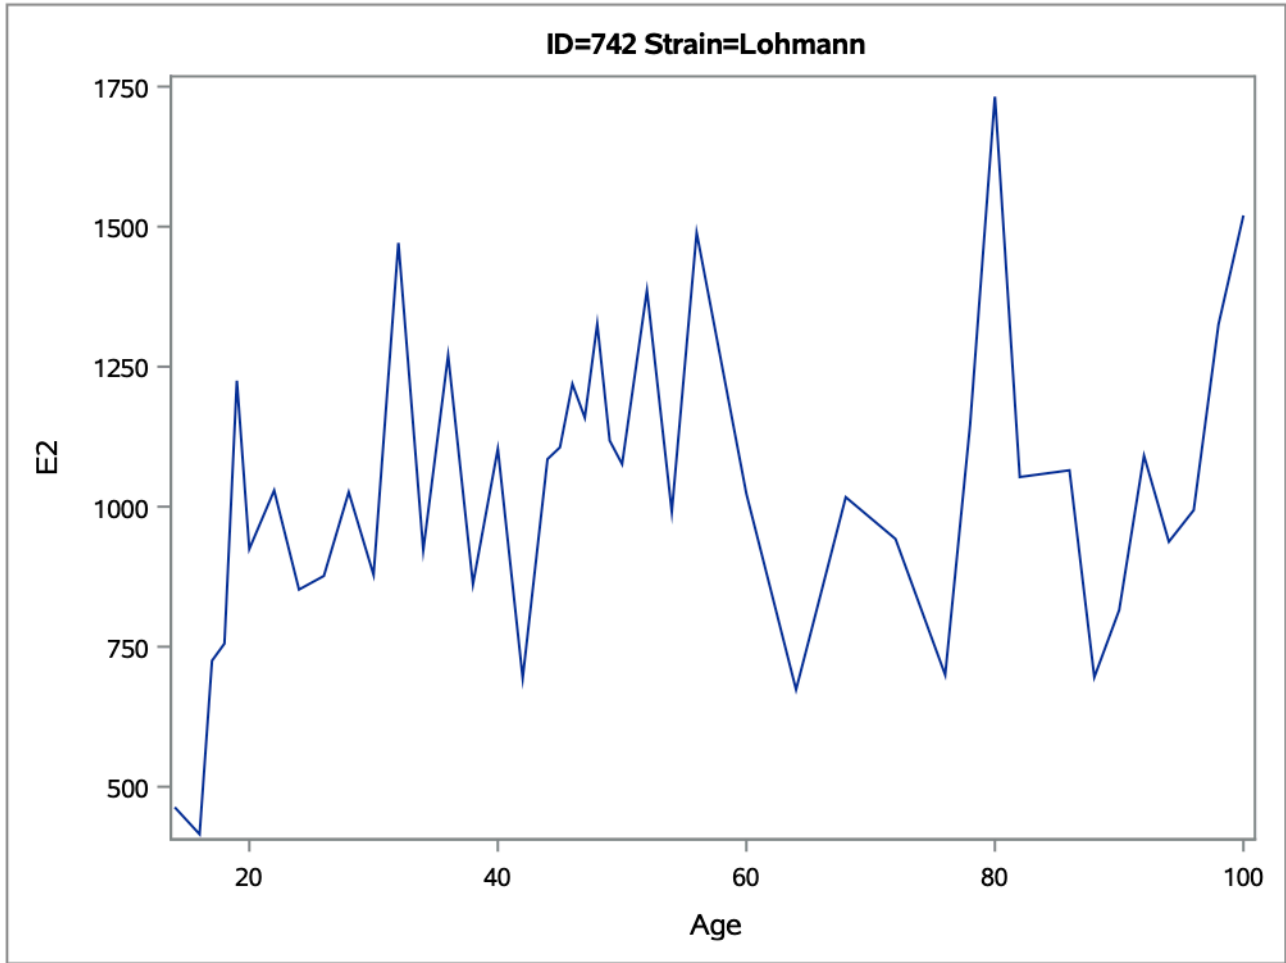

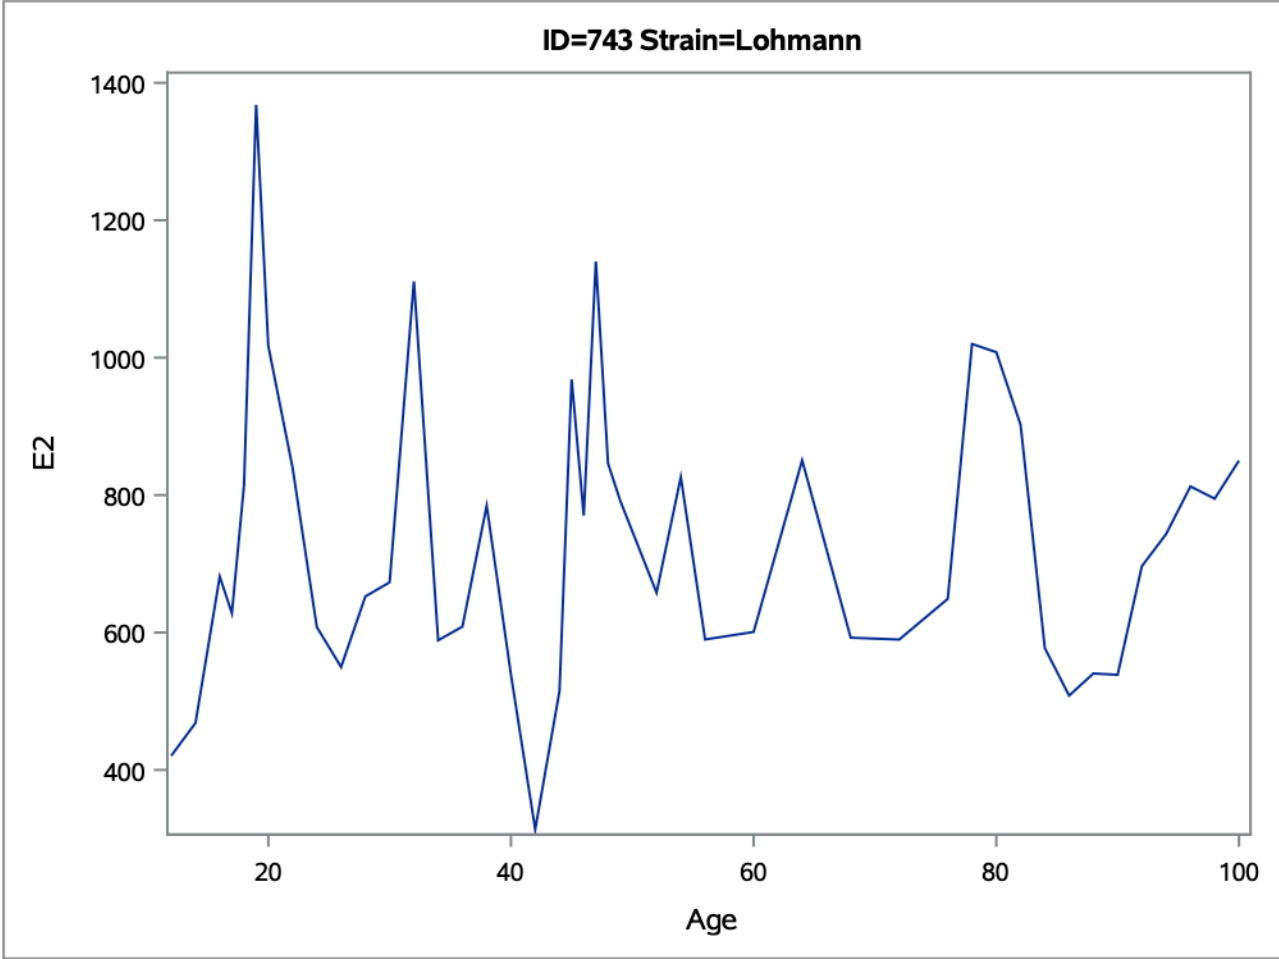

ID=745 Strain=Lohmann

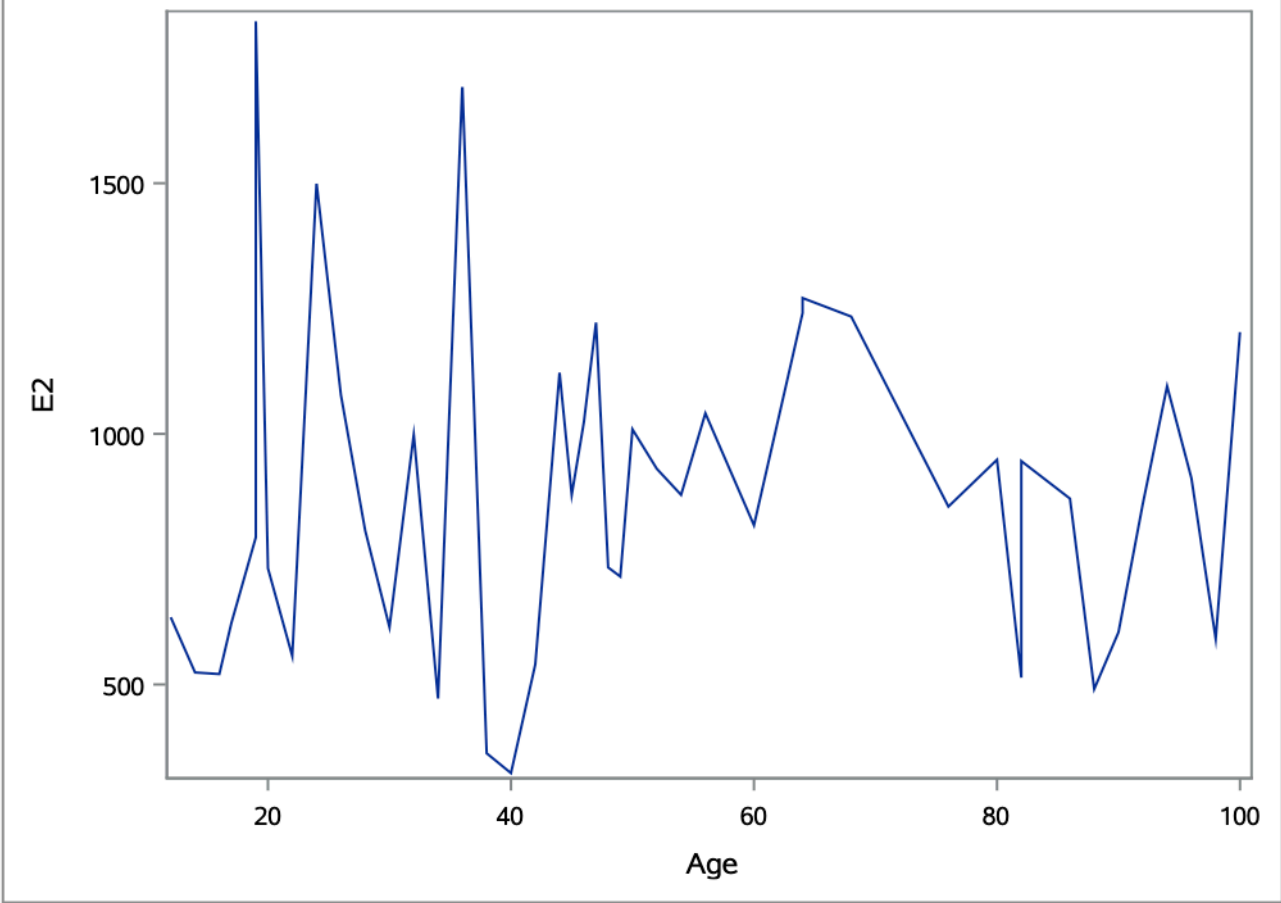

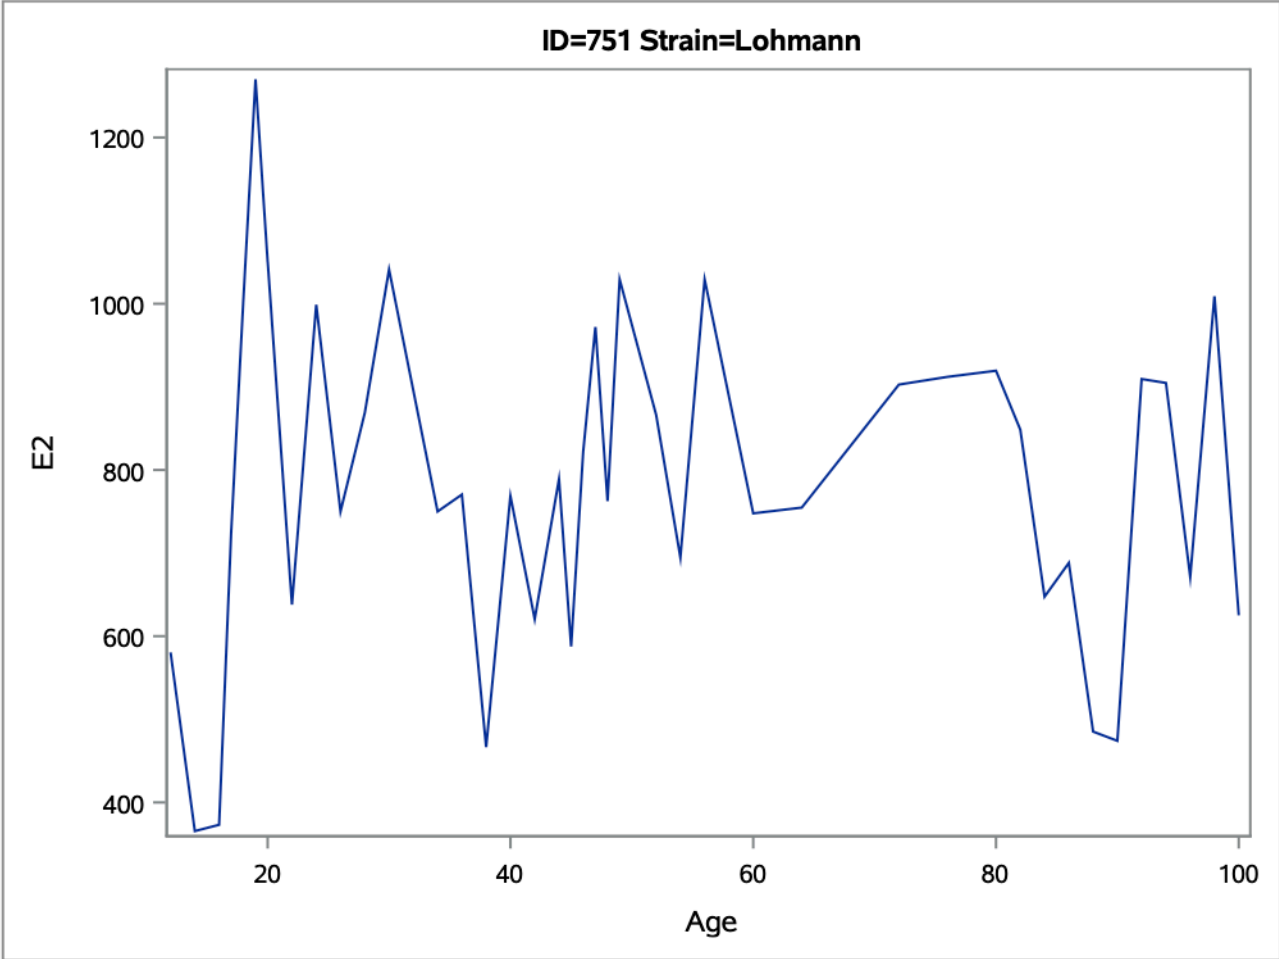

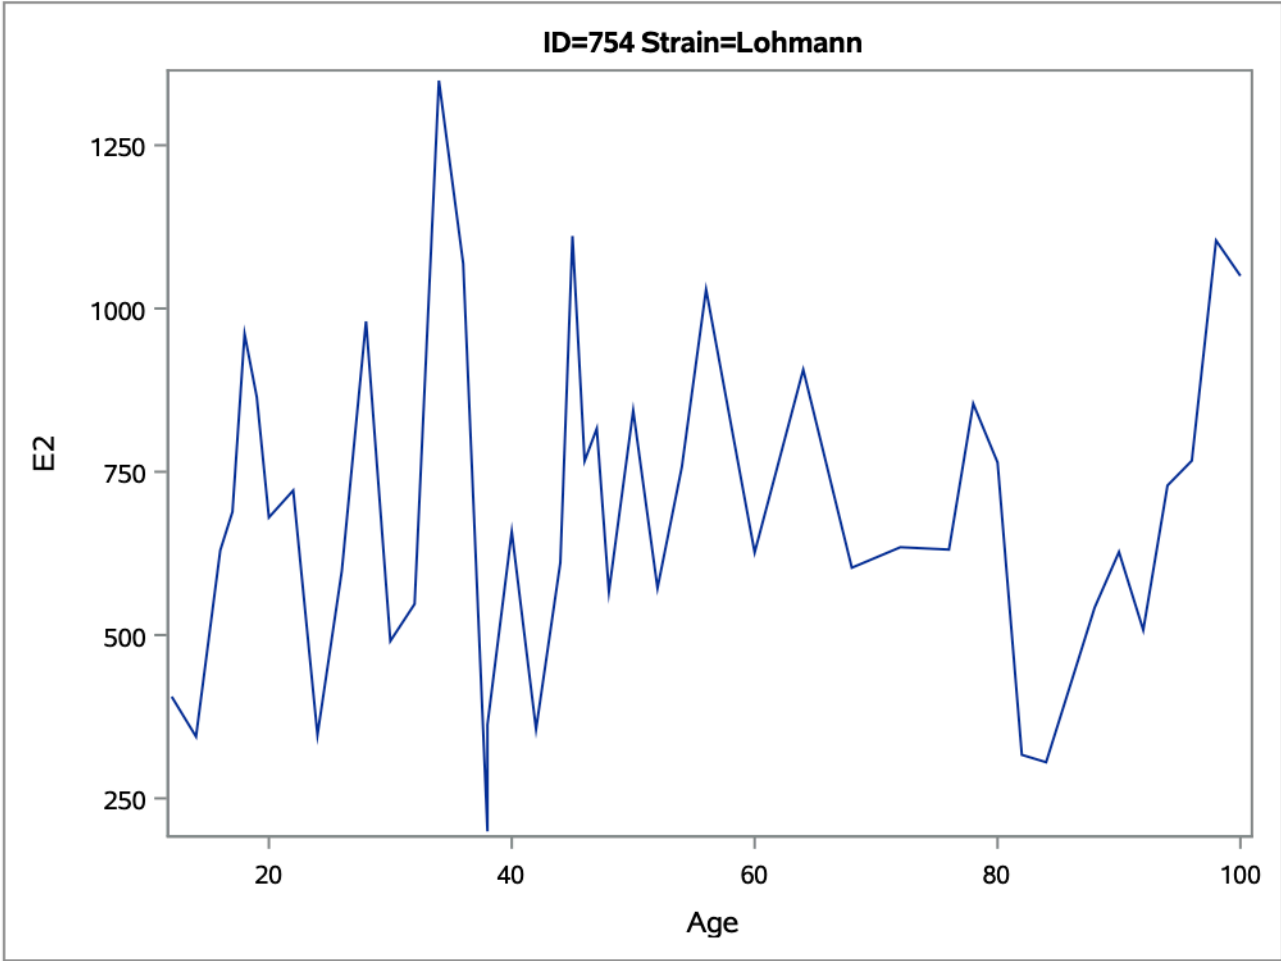



ID=755 Strain=Lohmann

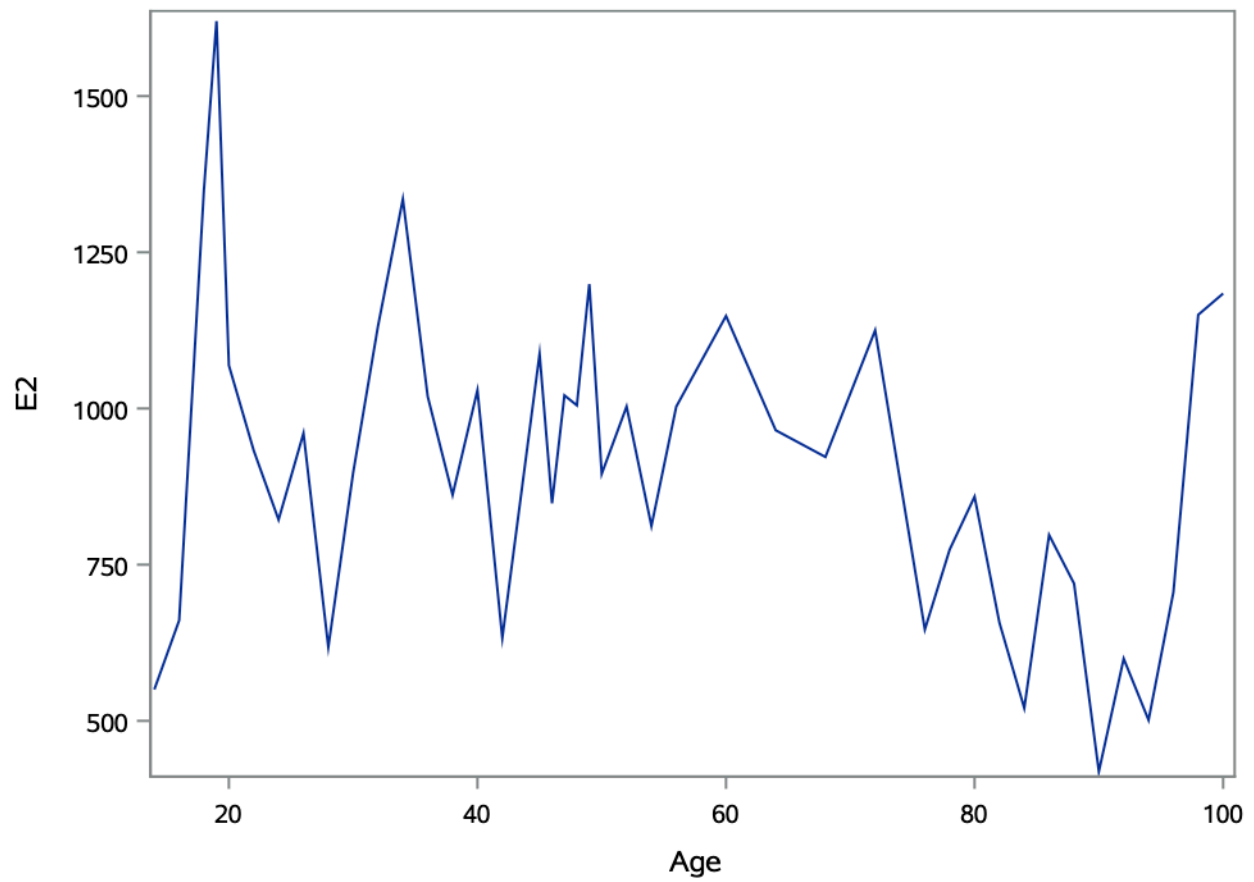

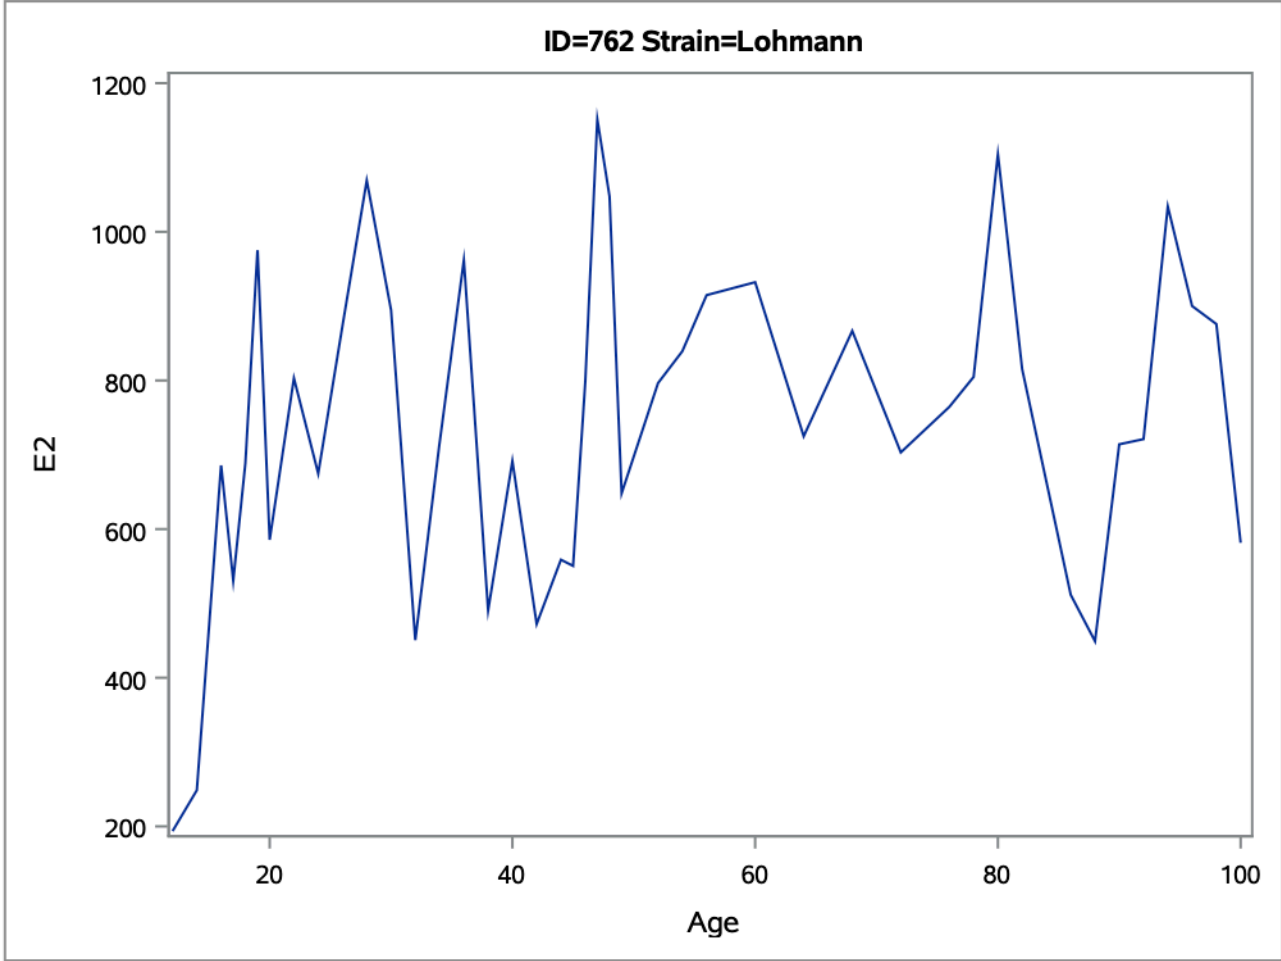

ID=764 Strain=Lohmann

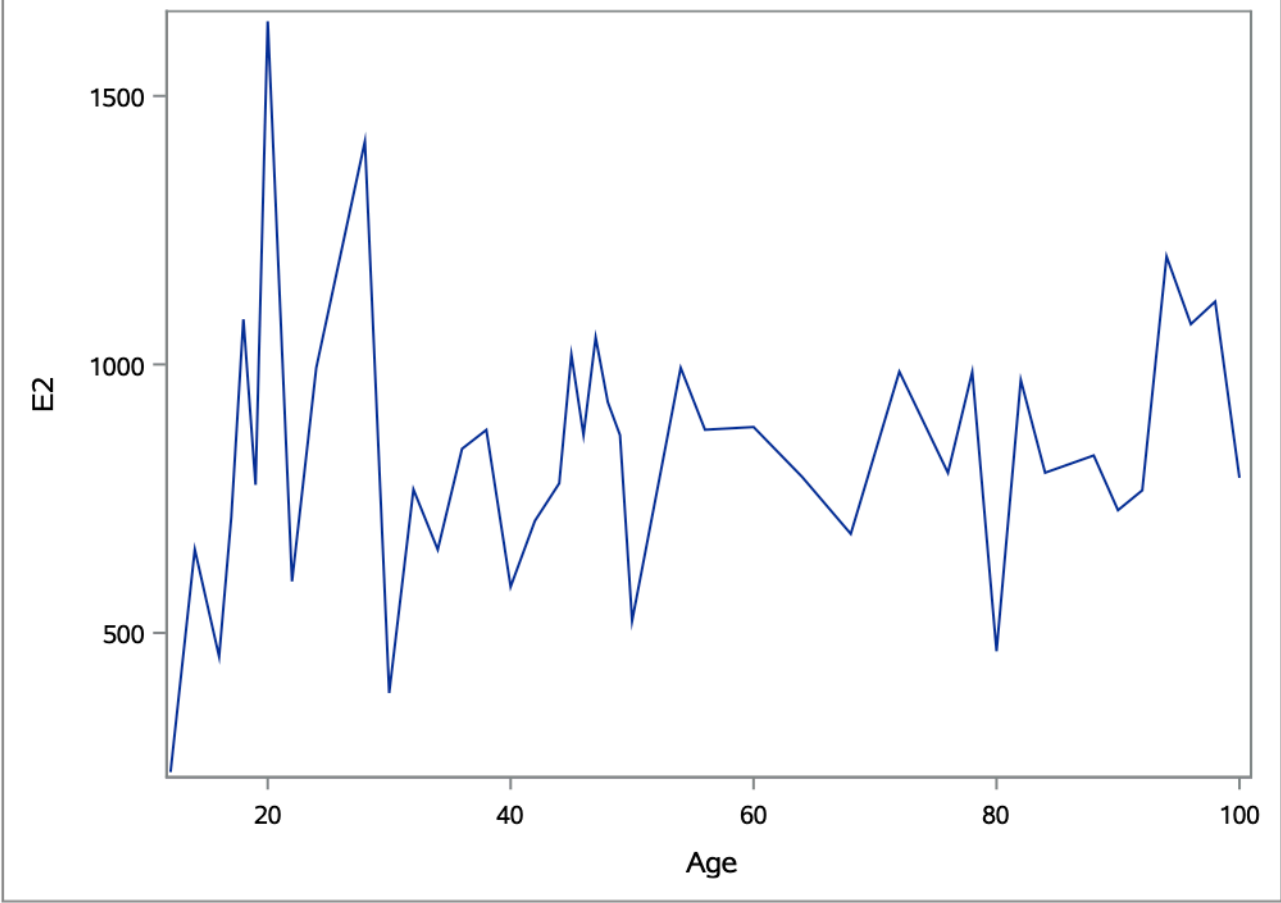

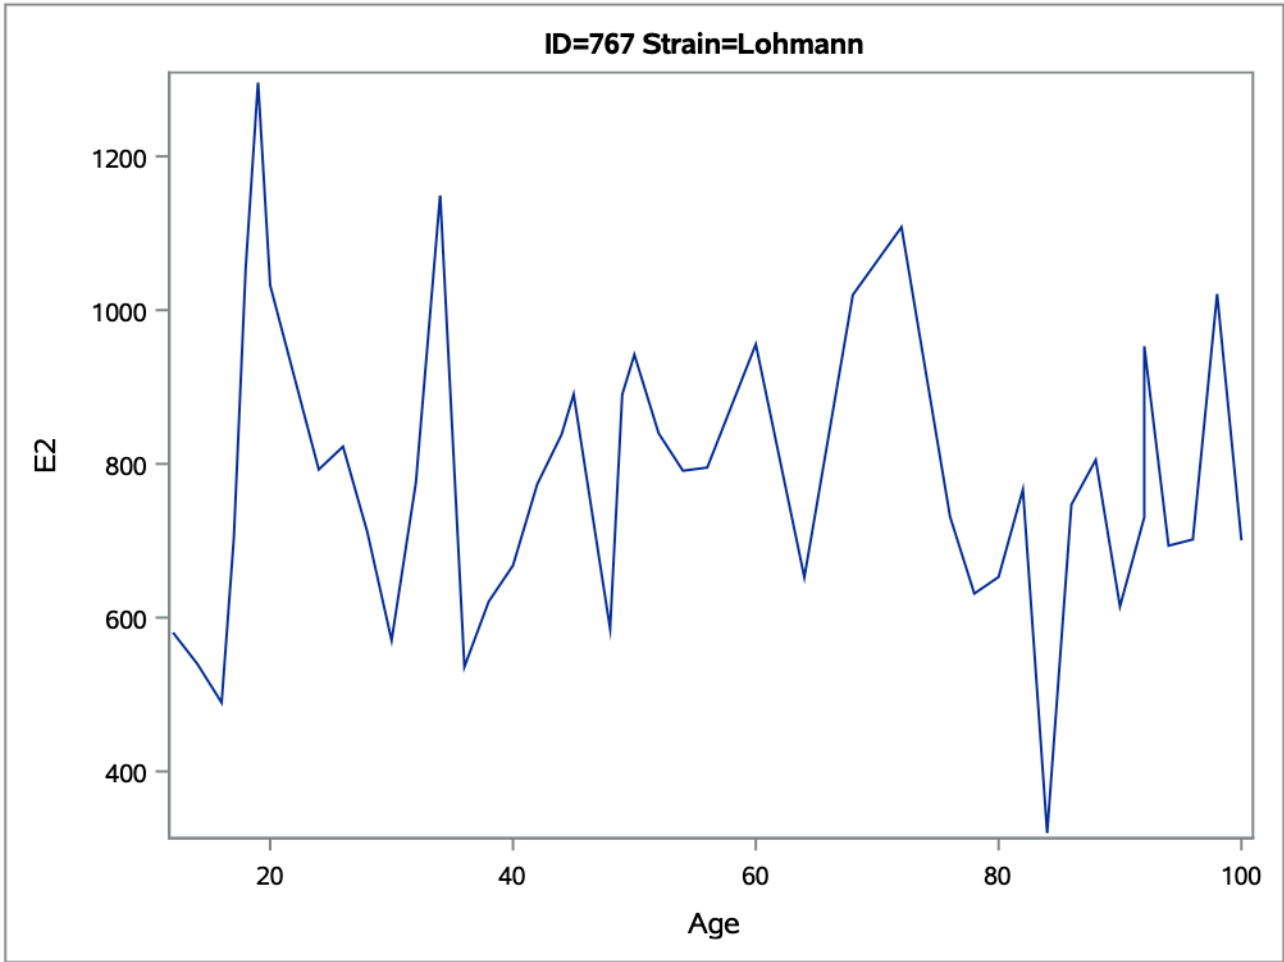

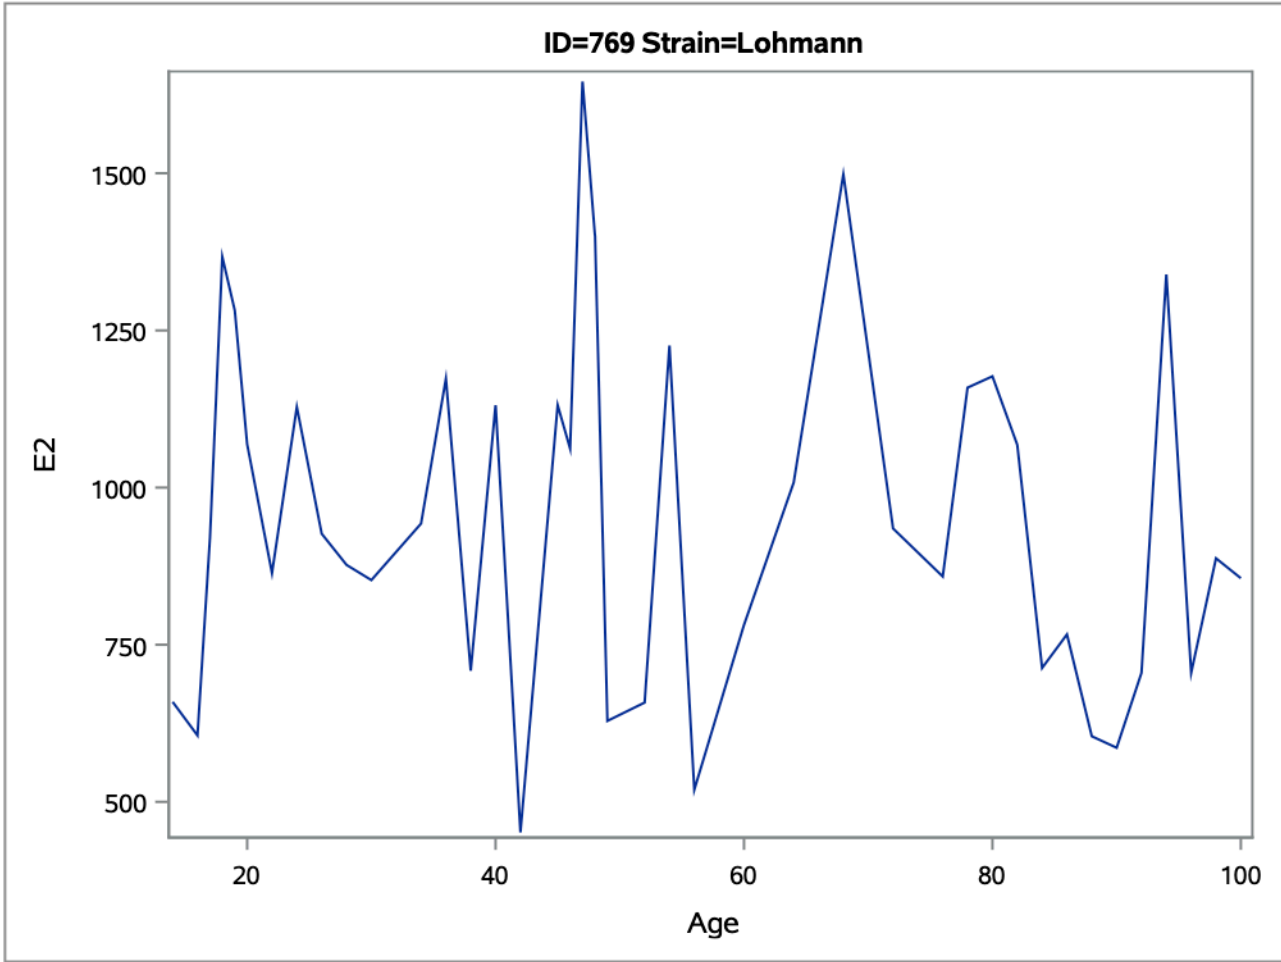

ID=773 Strain=Lohmann

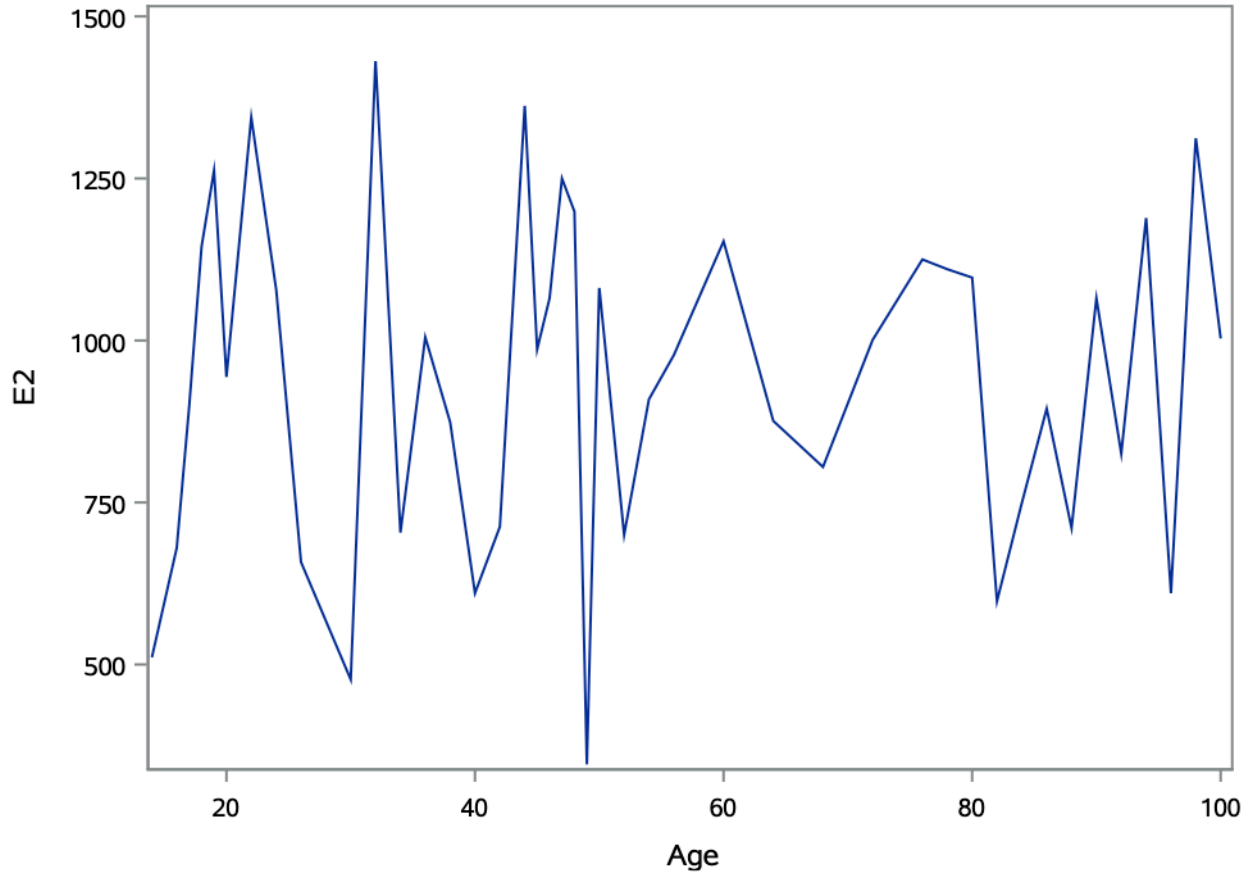

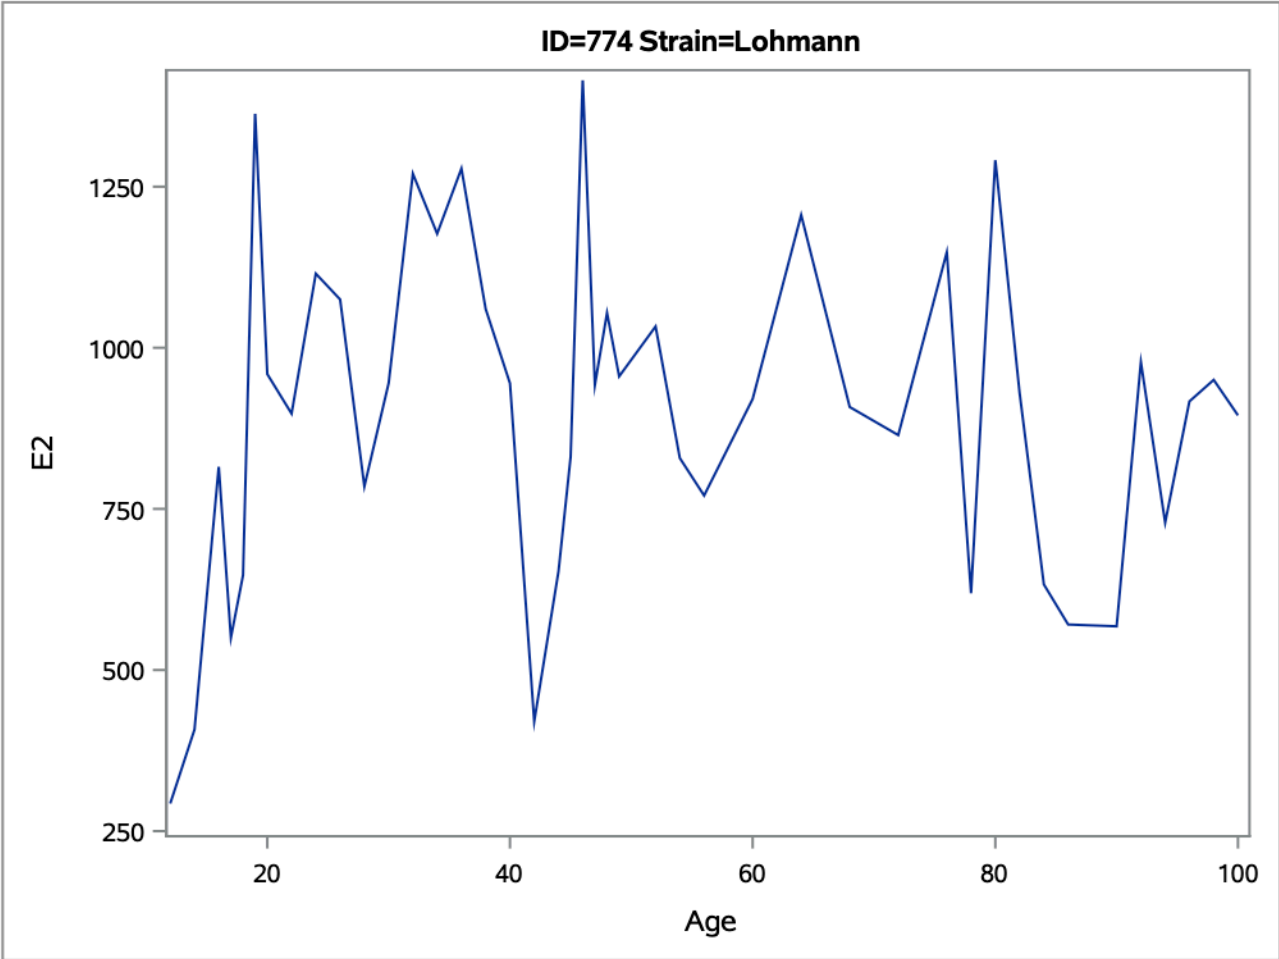

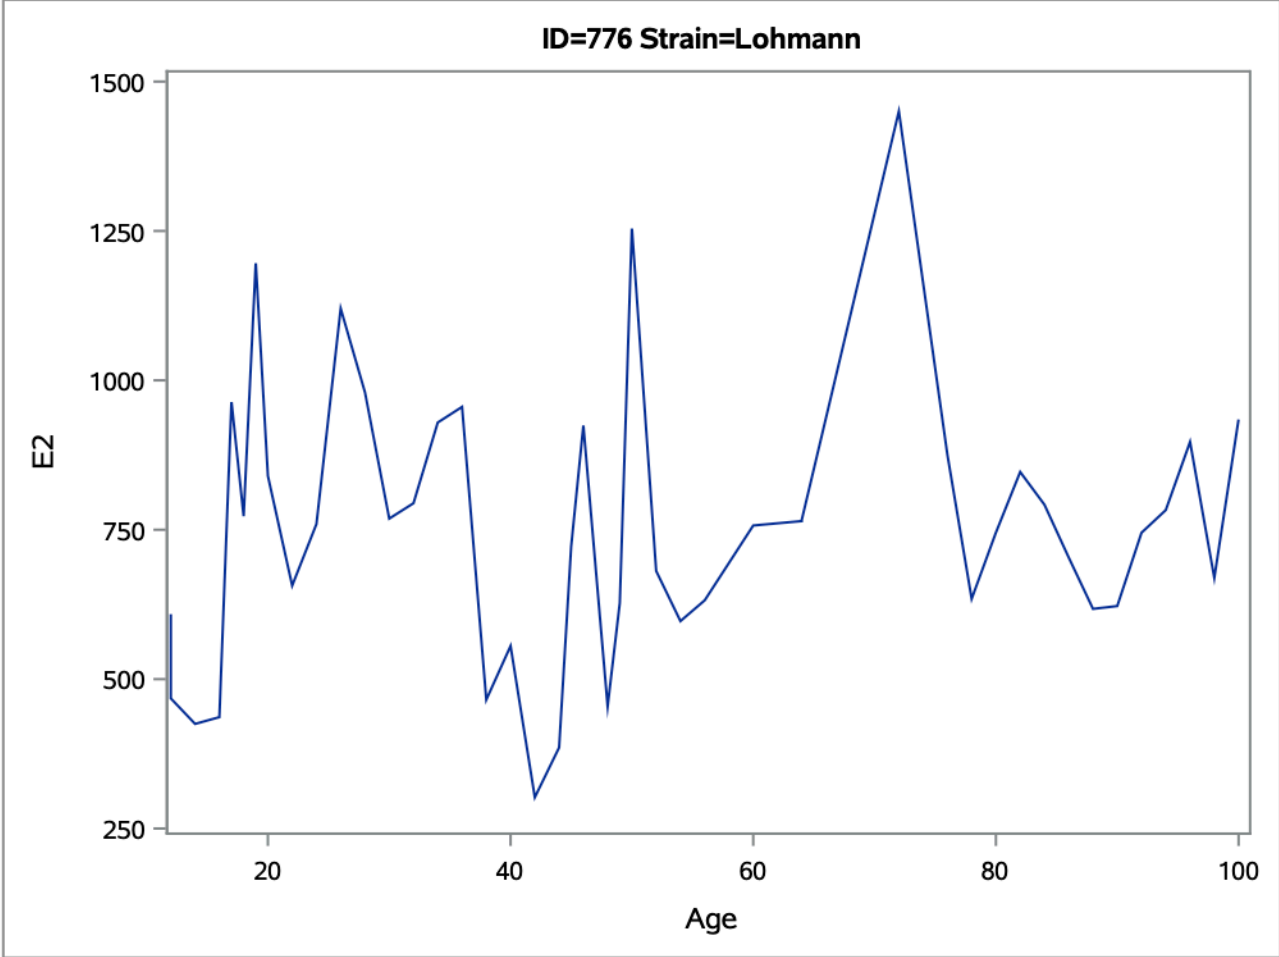



ID=777 Strain=Lohmann

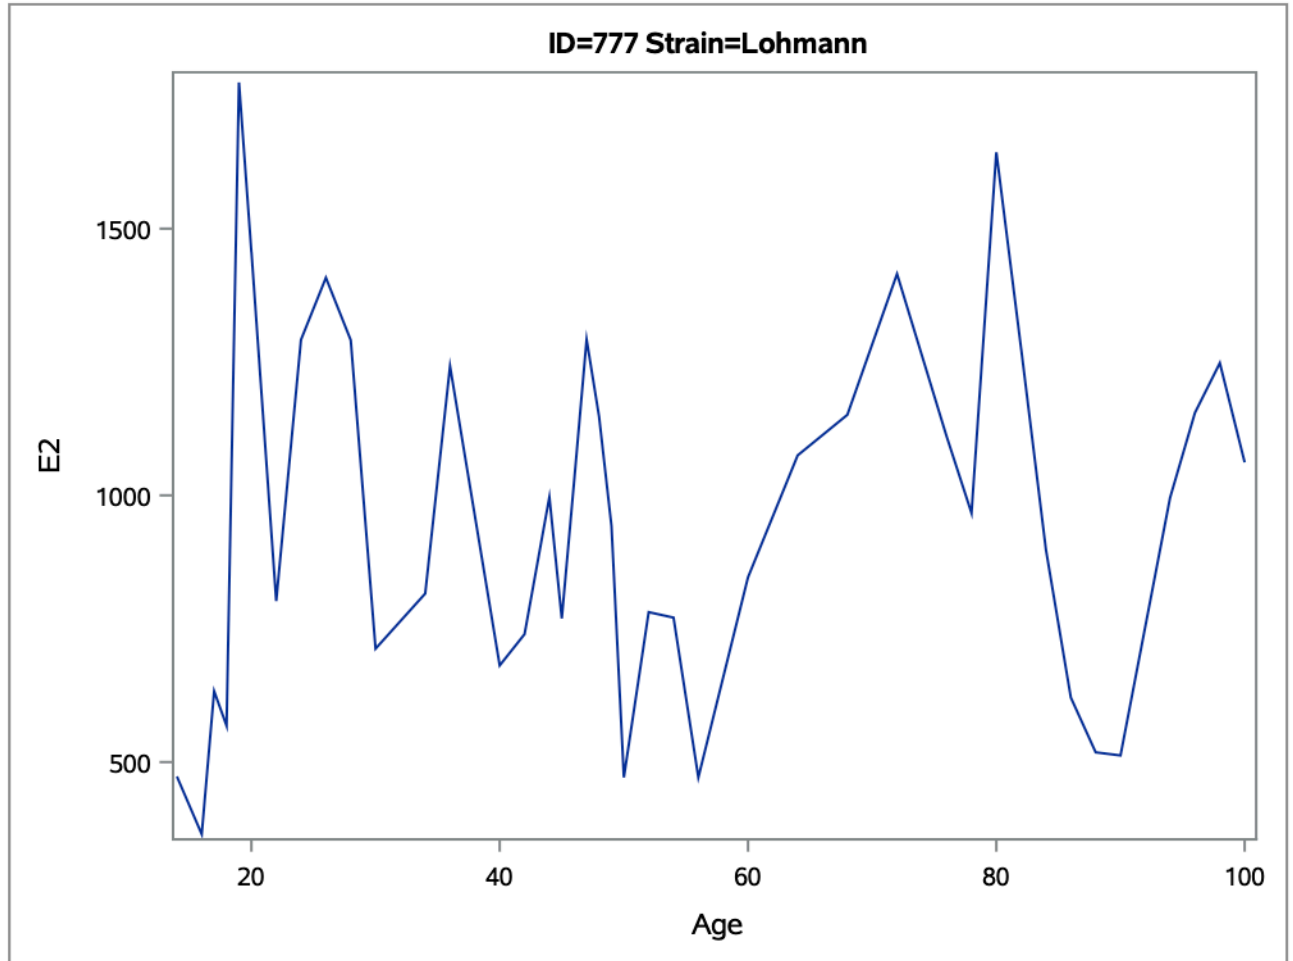

ID=789 Strain=Lohmann

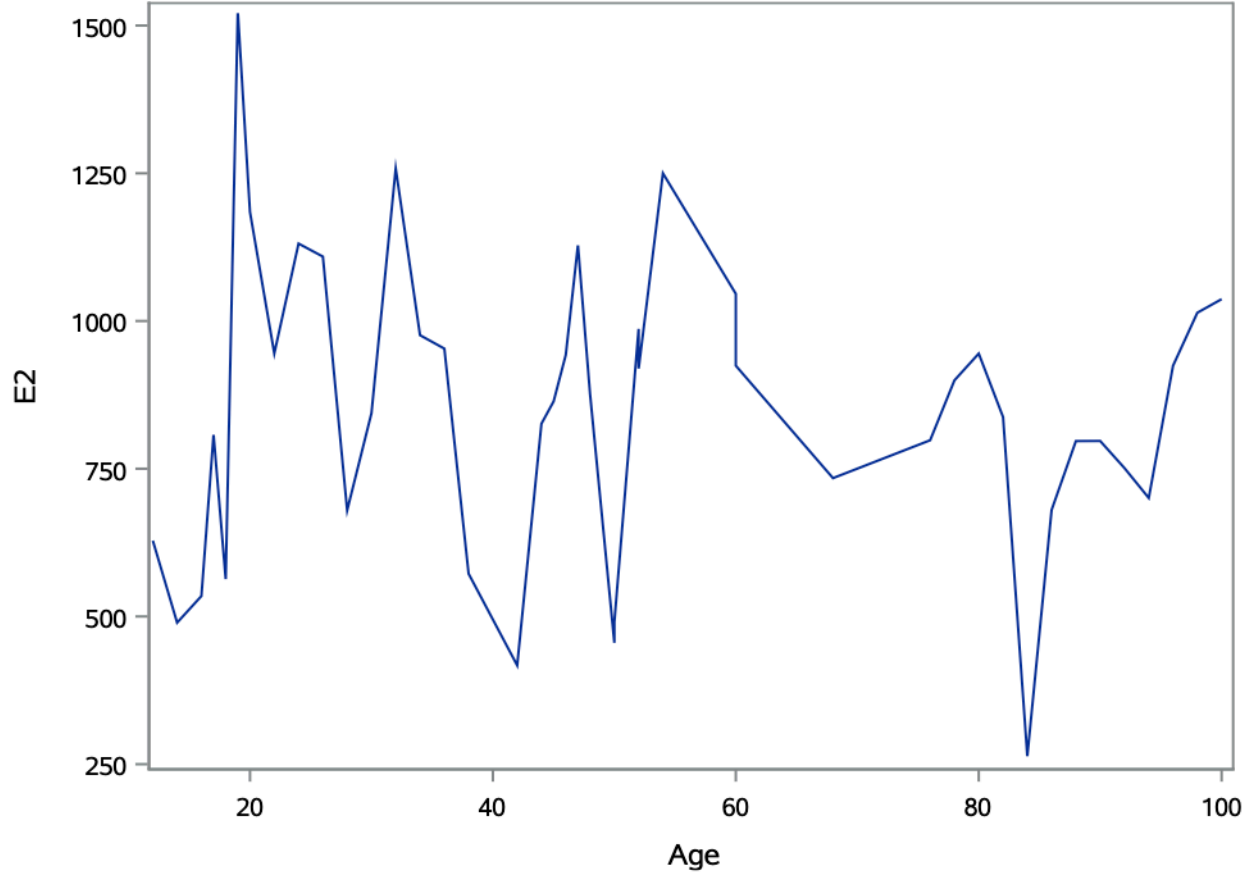

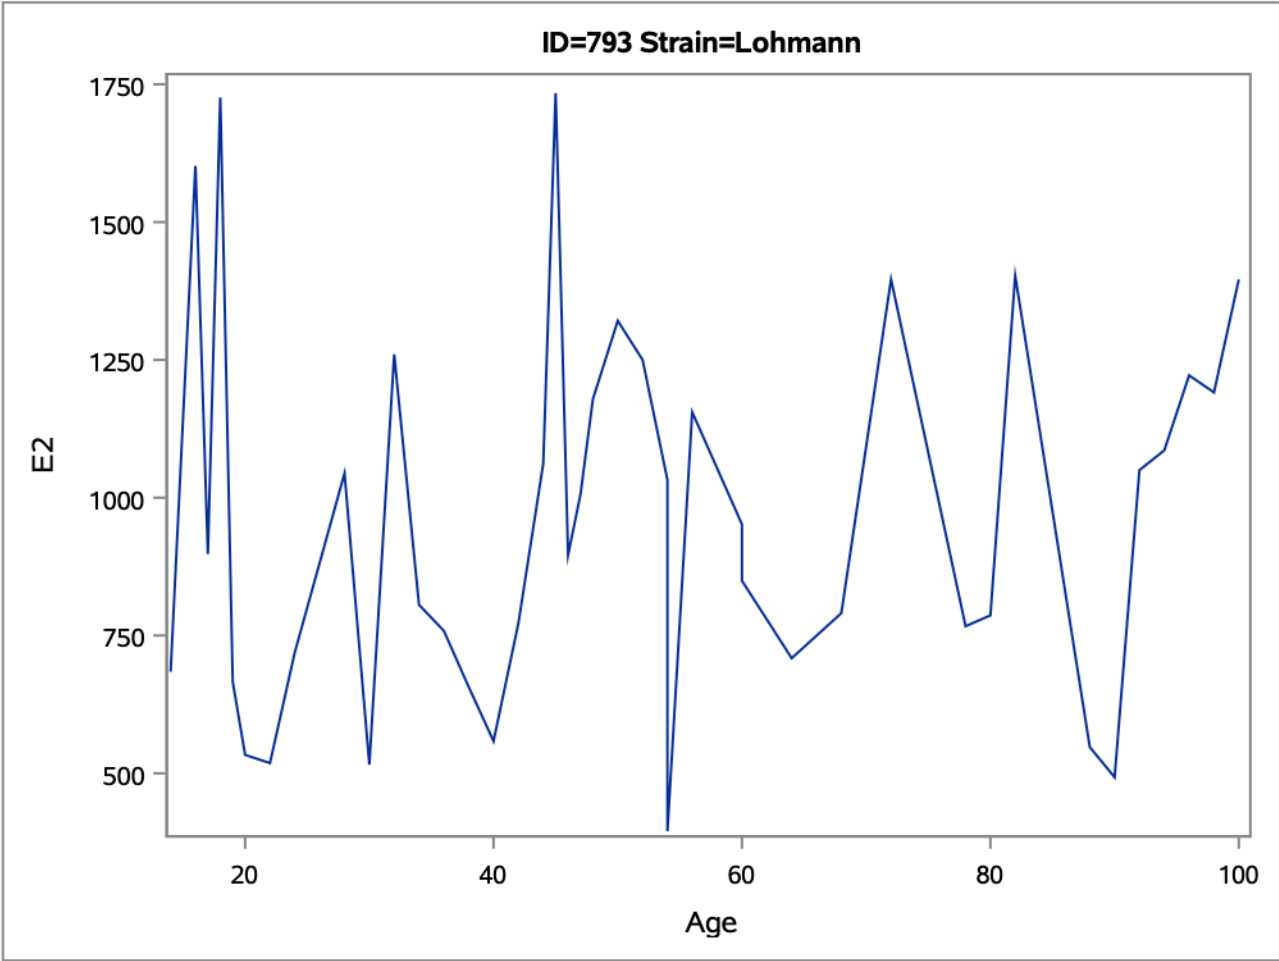

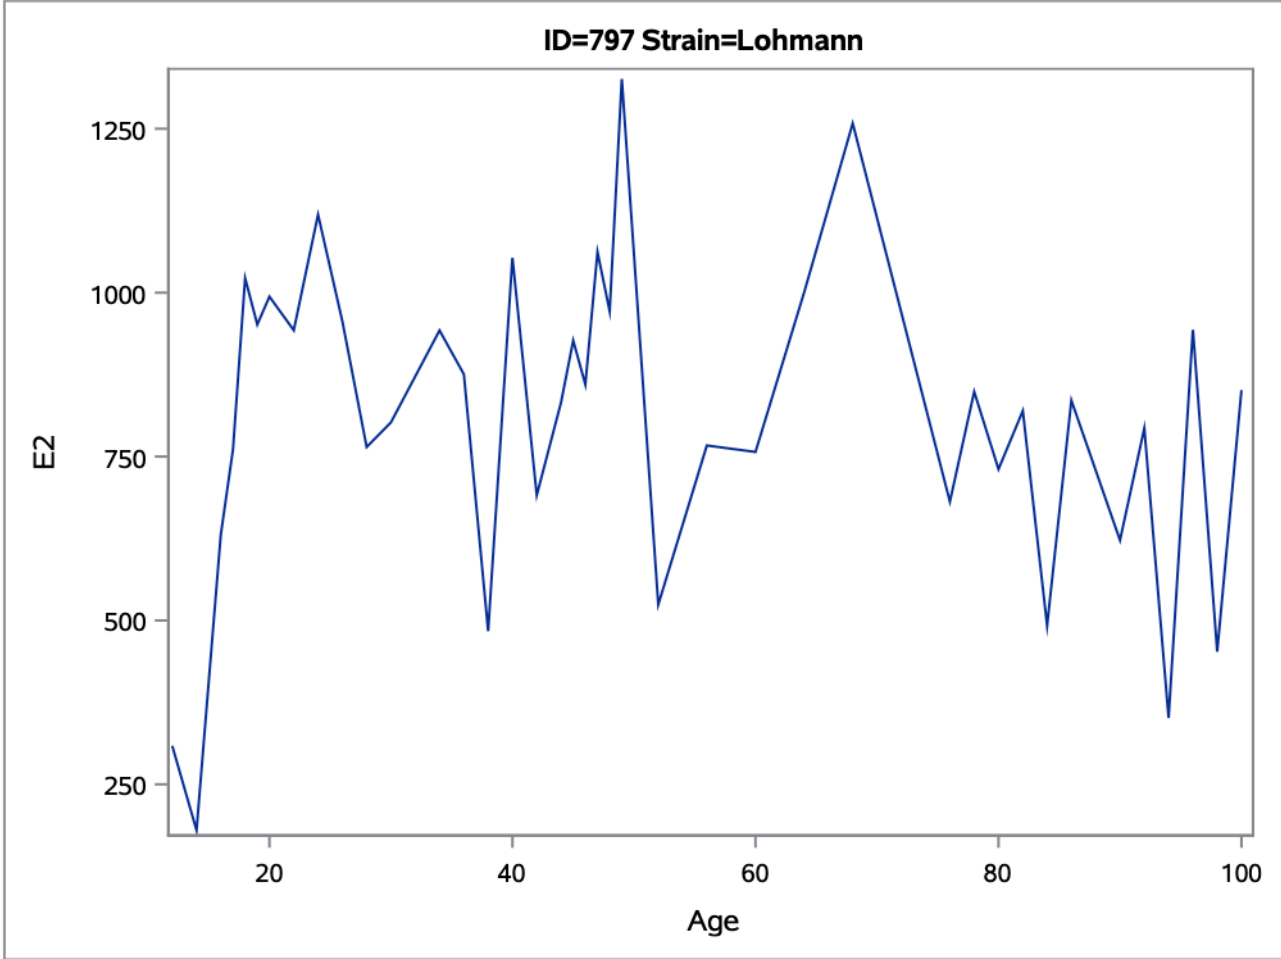

ID=798 Strain=Lohmann

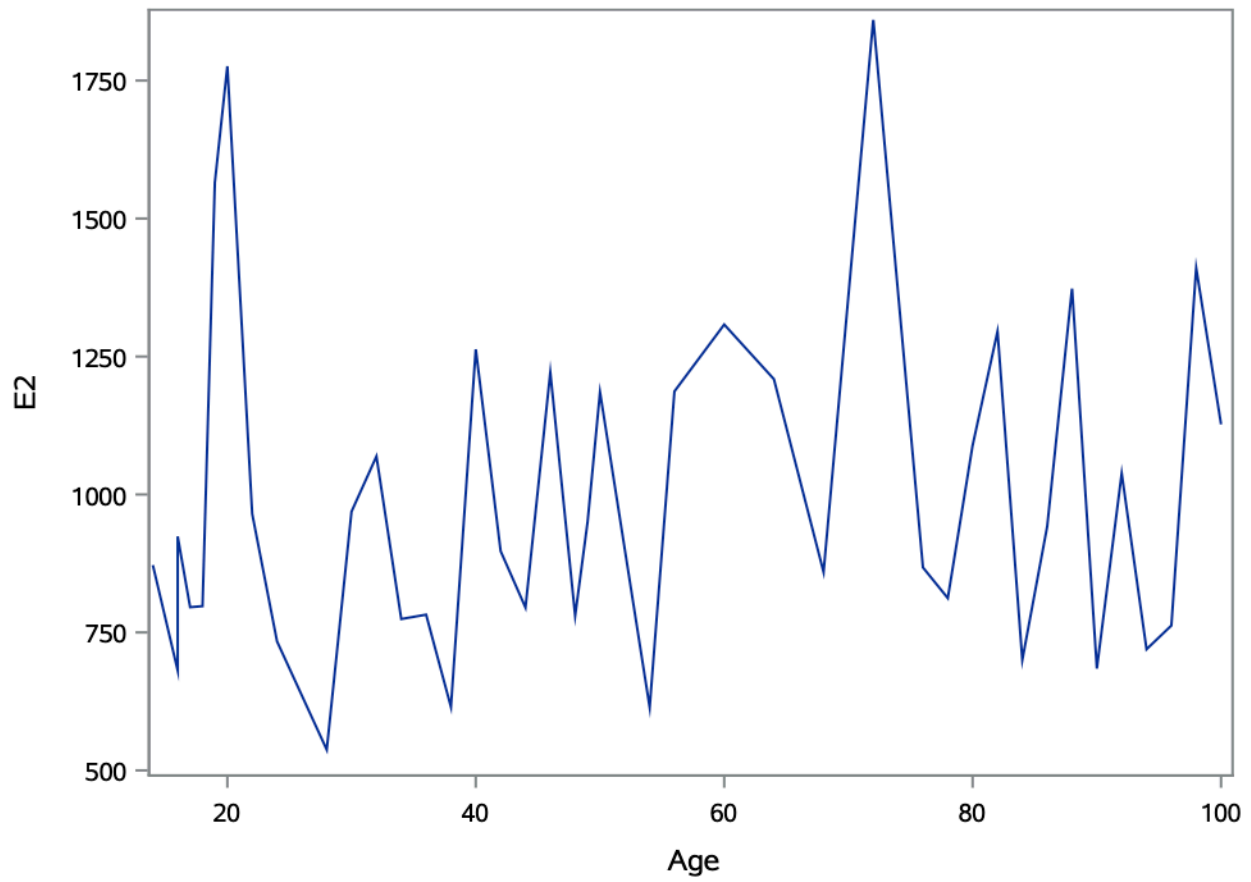

ID=799 Strain=Lohmann

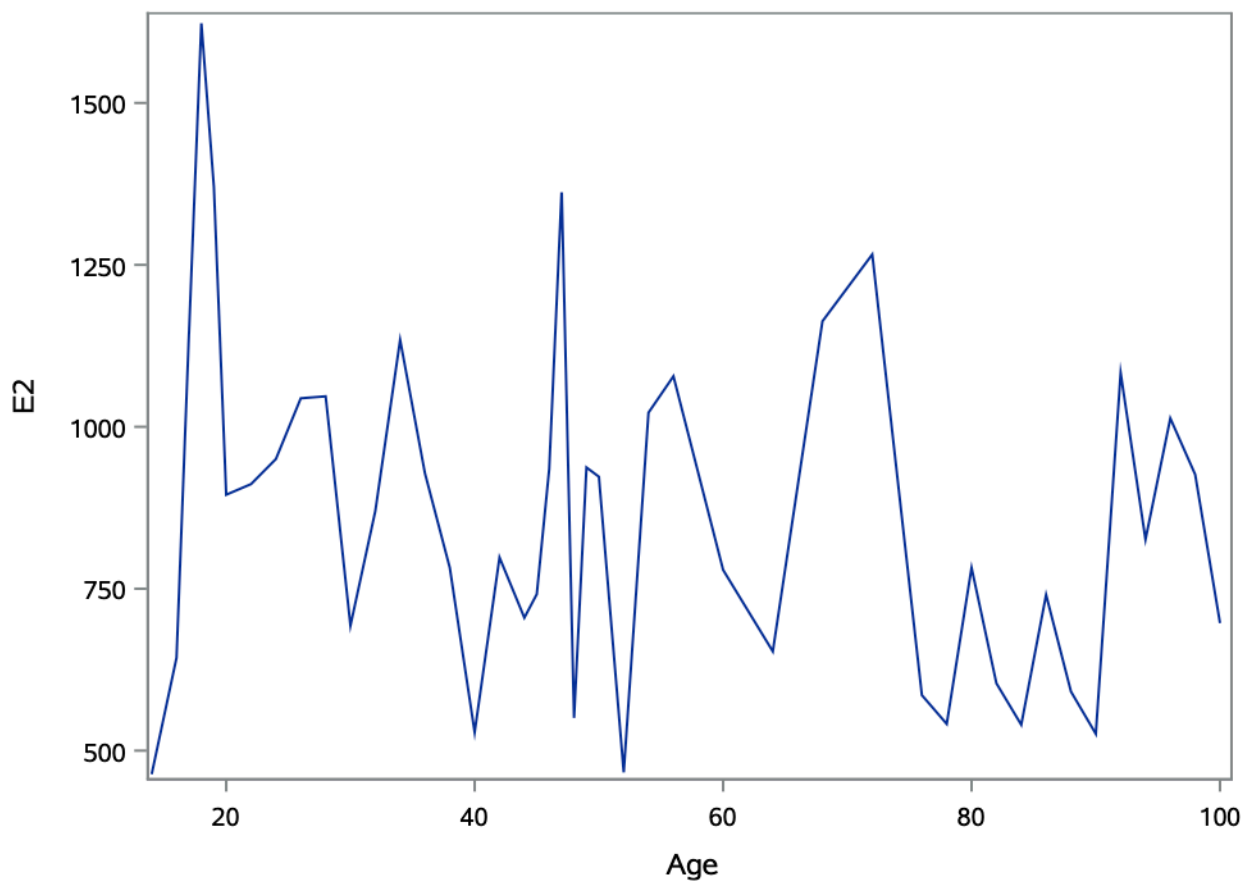

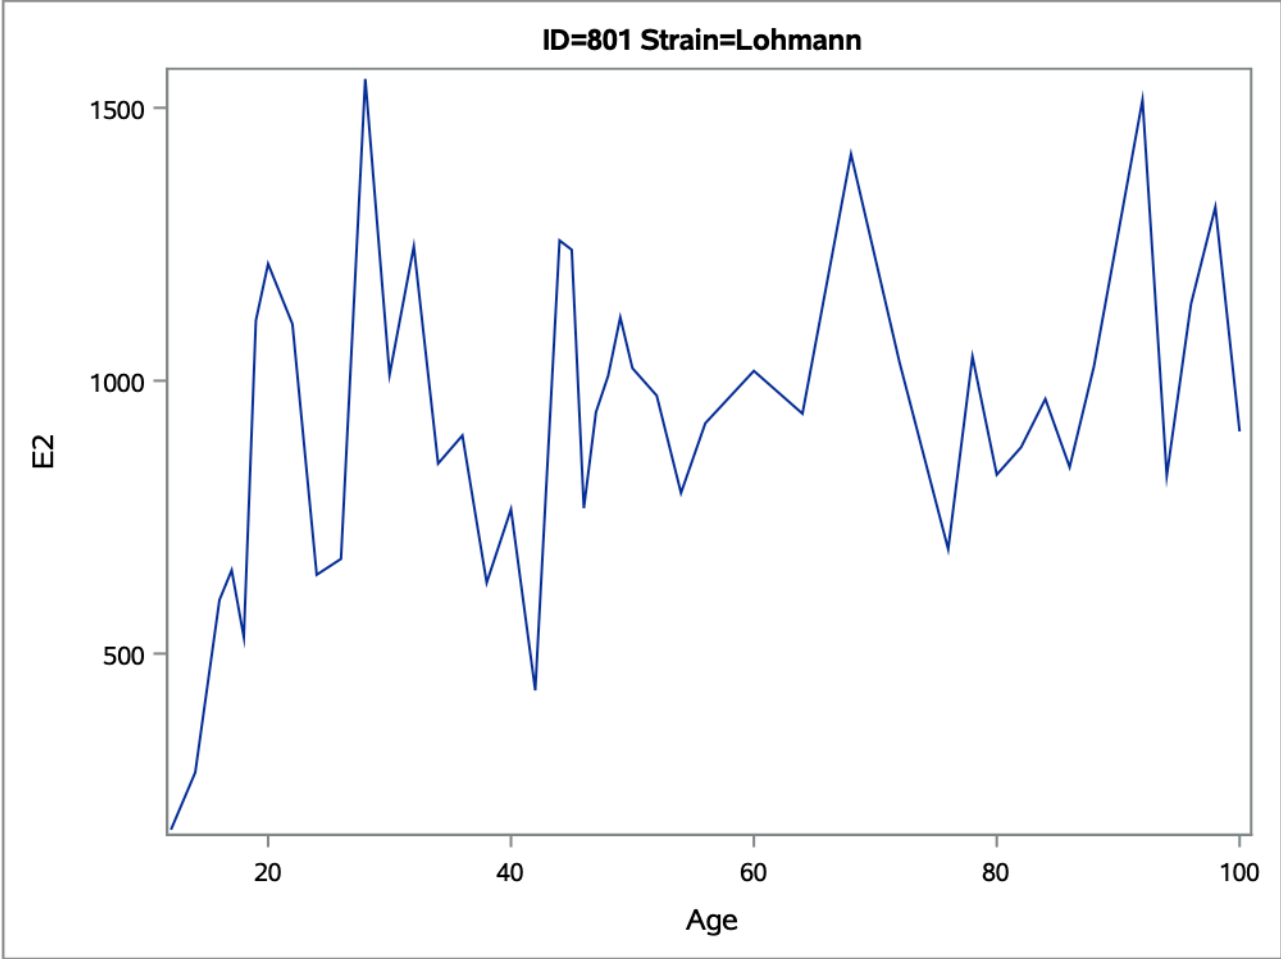

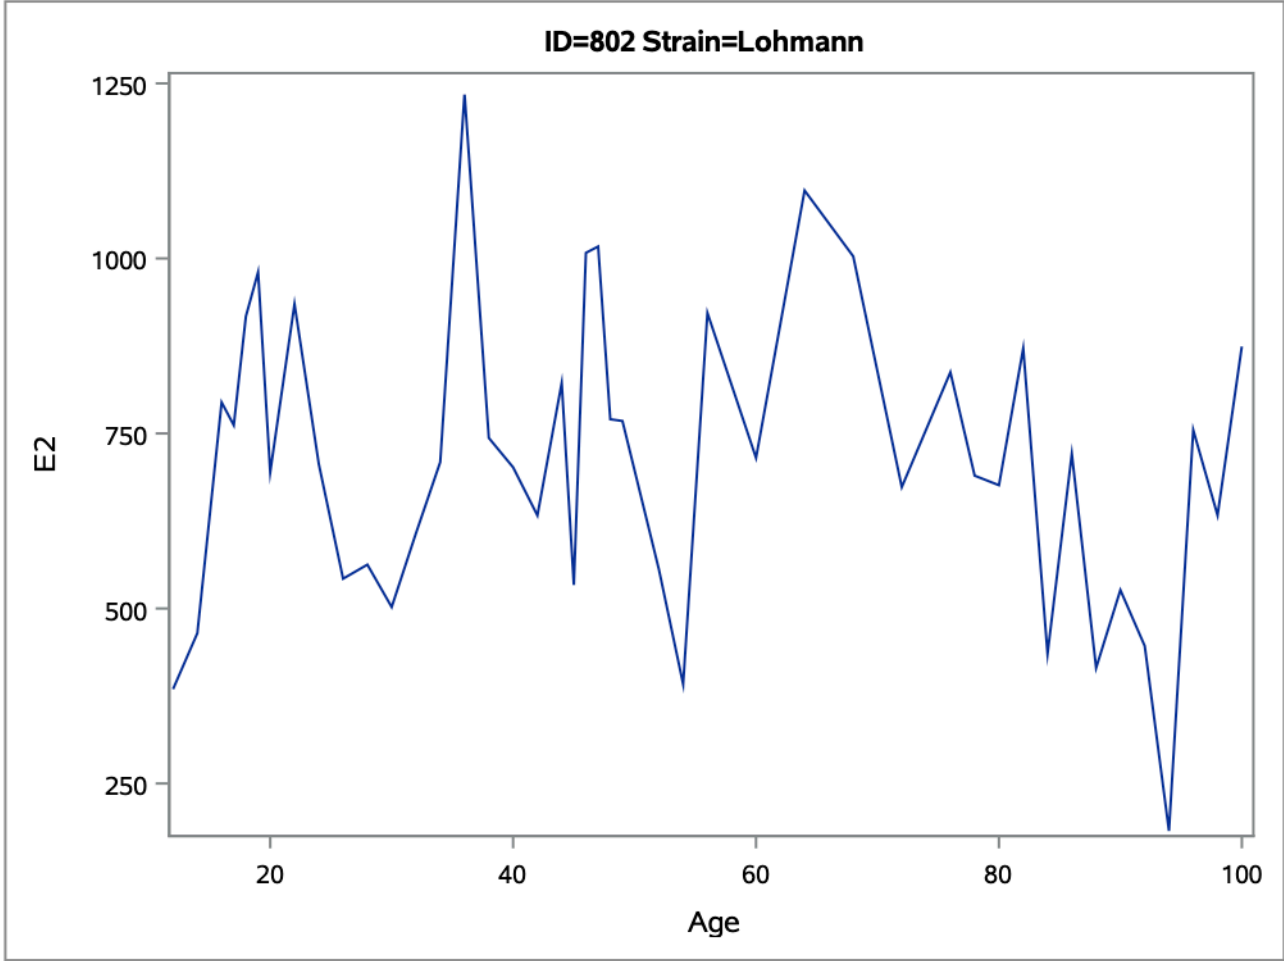



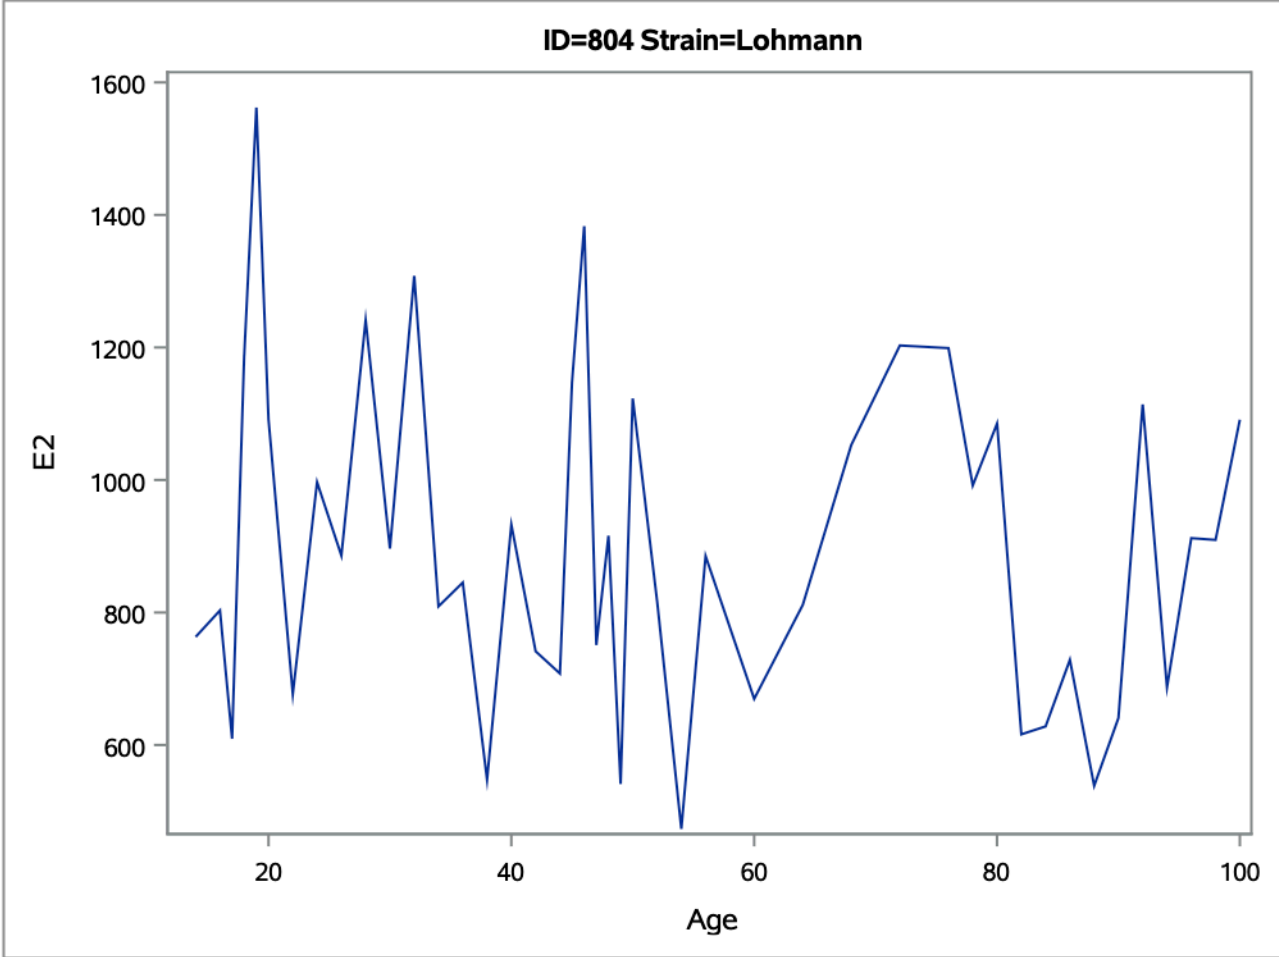

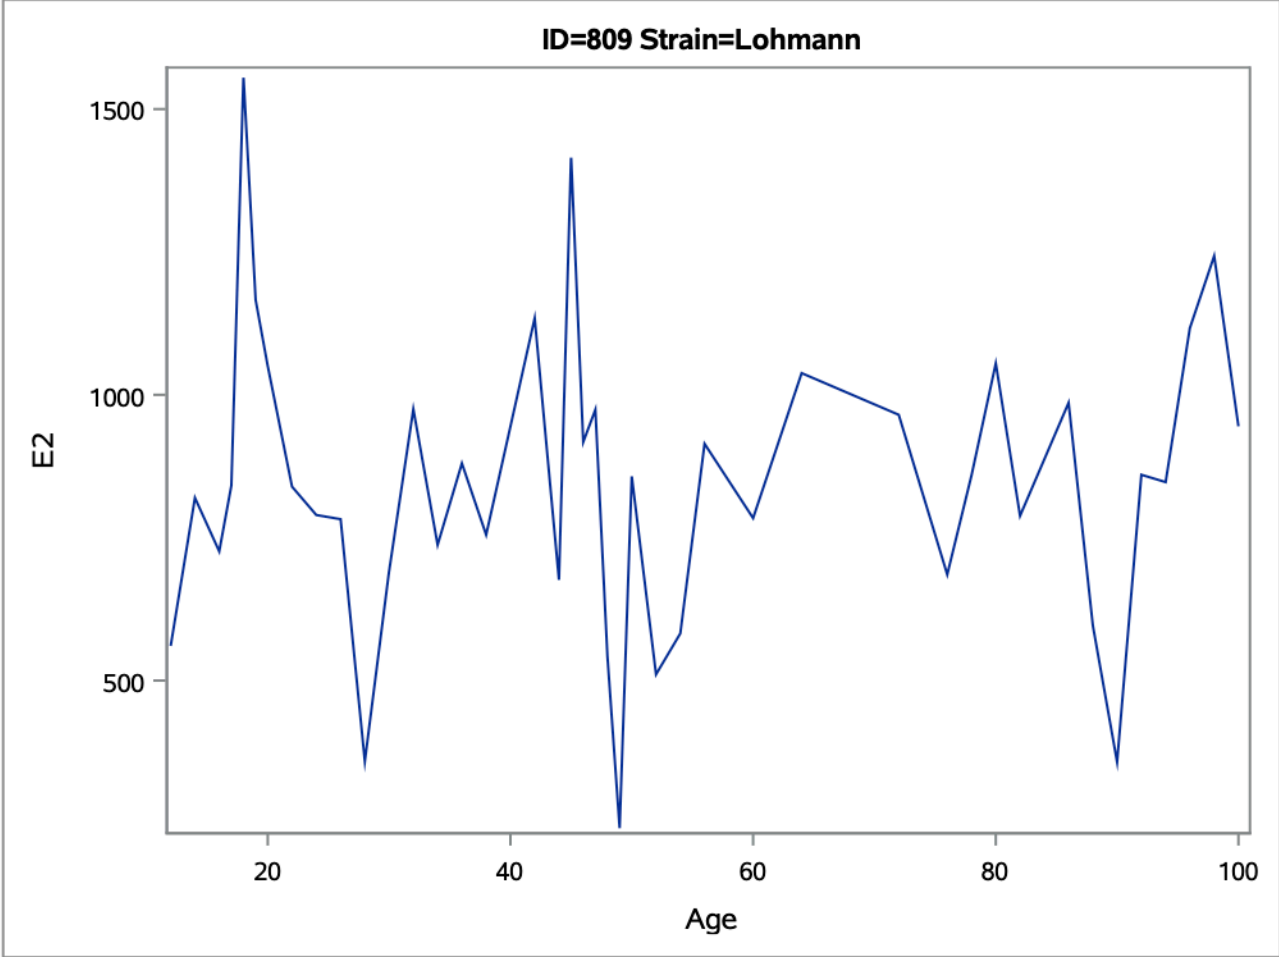

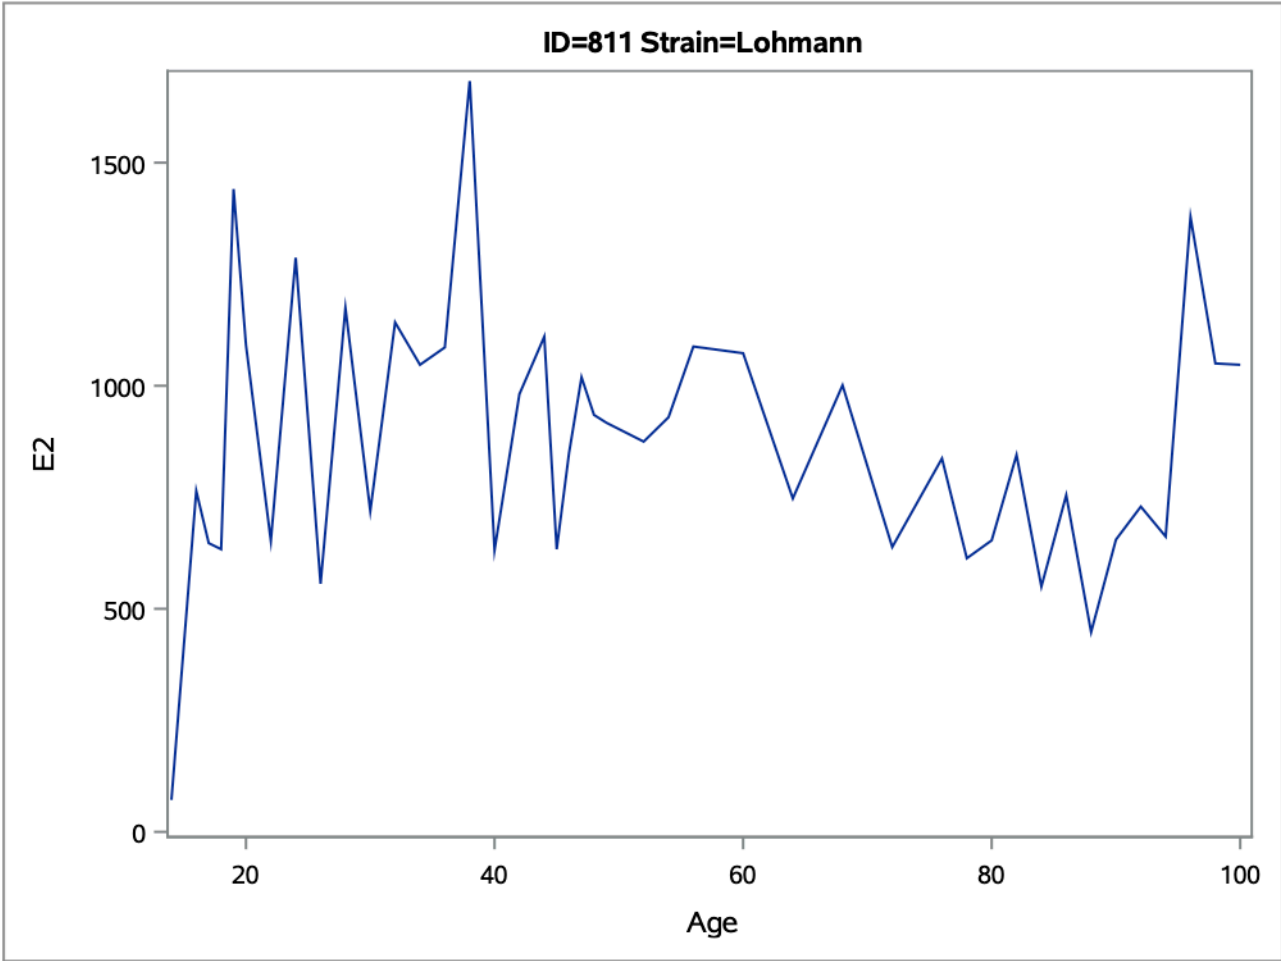

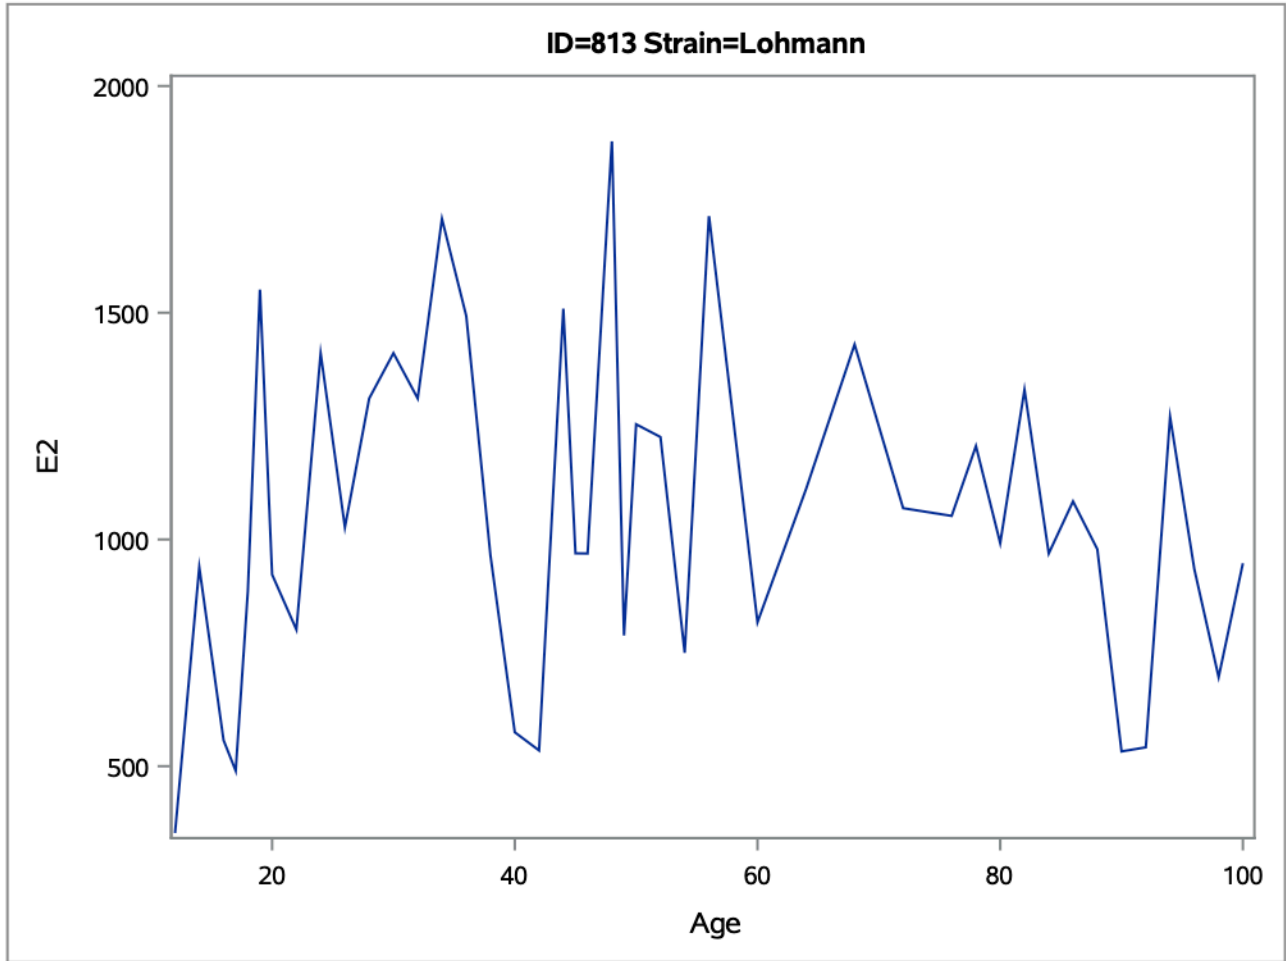

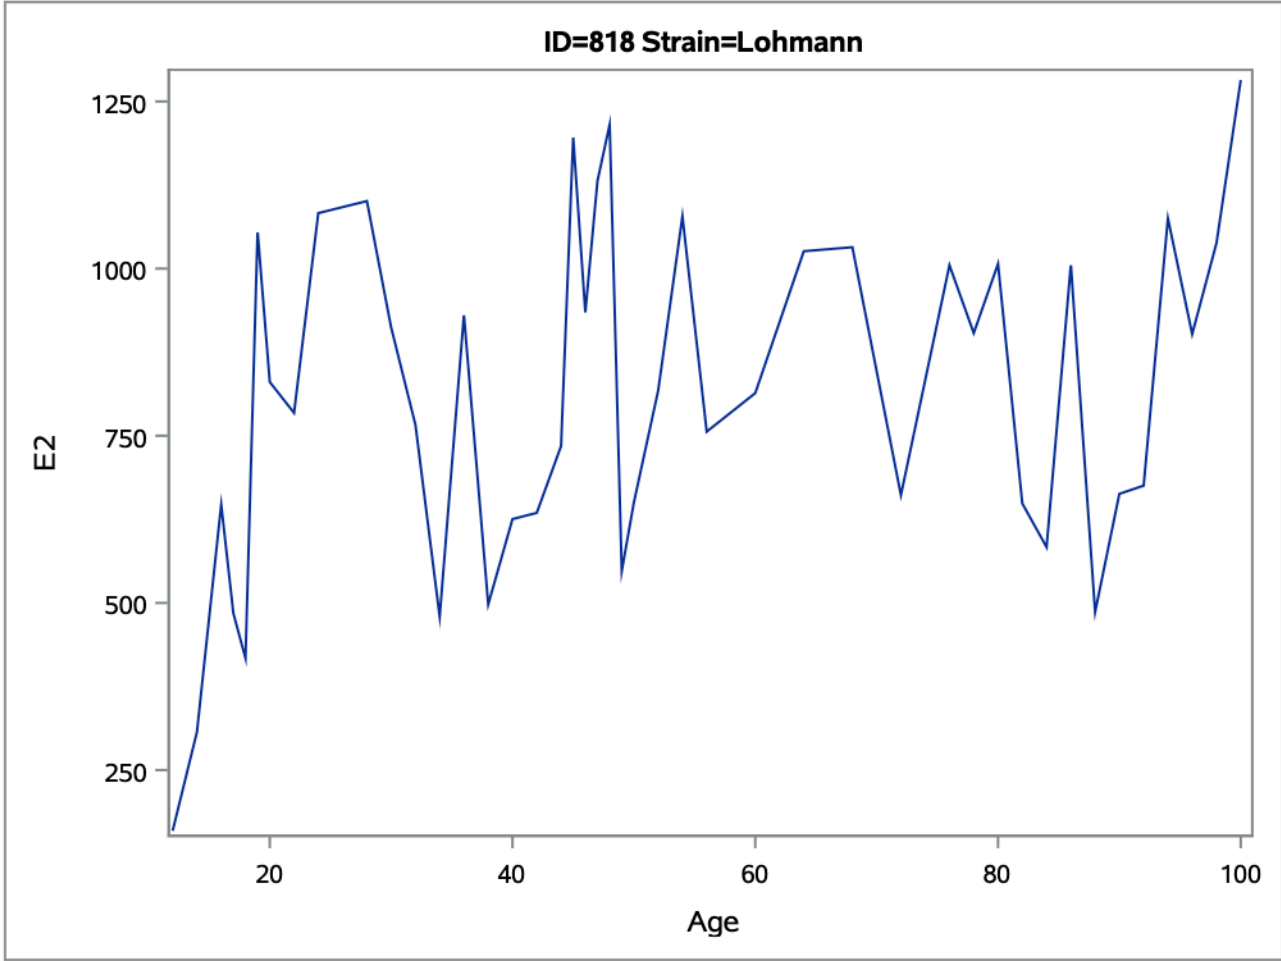

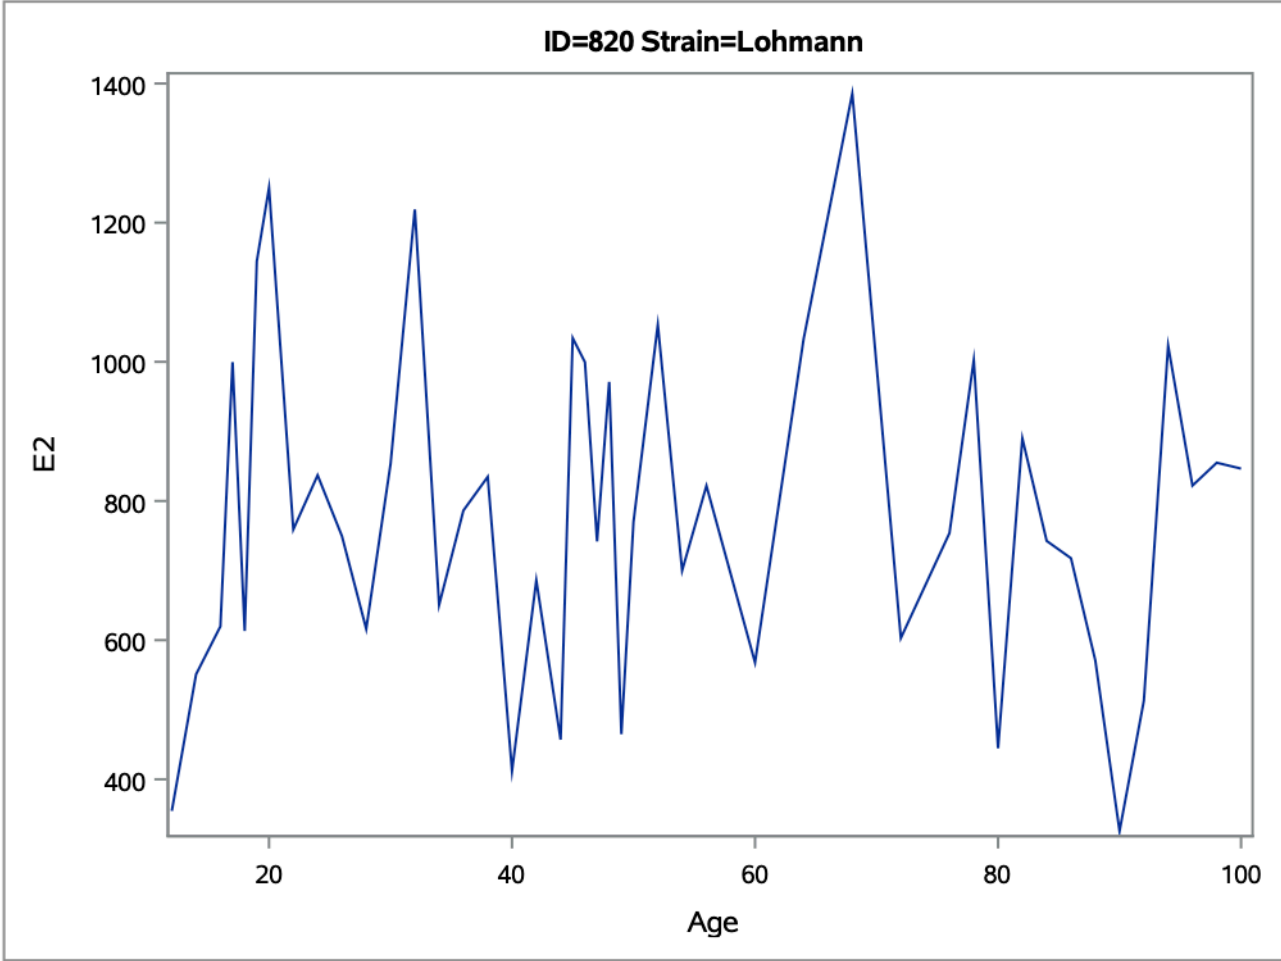

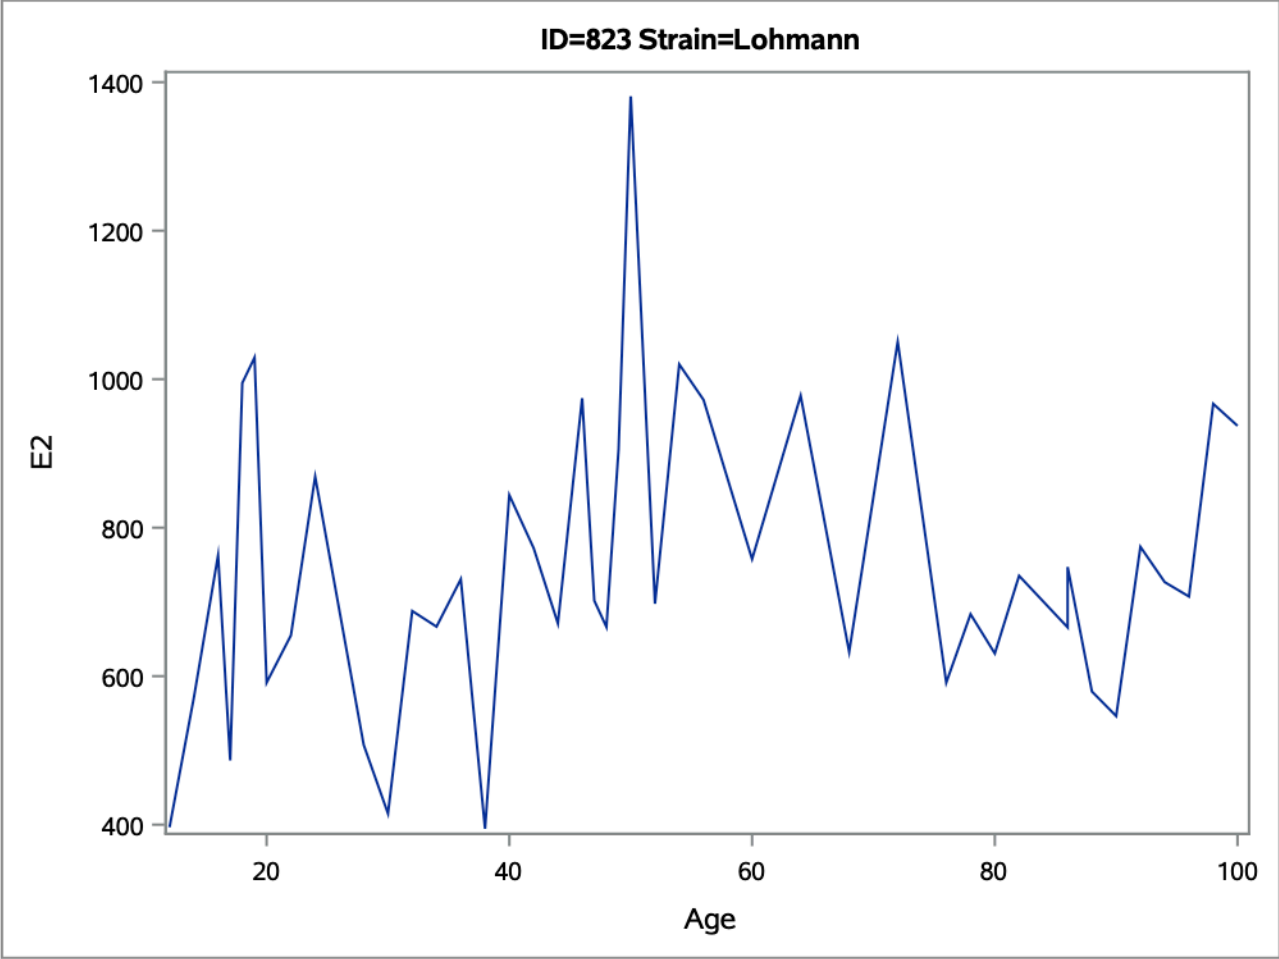

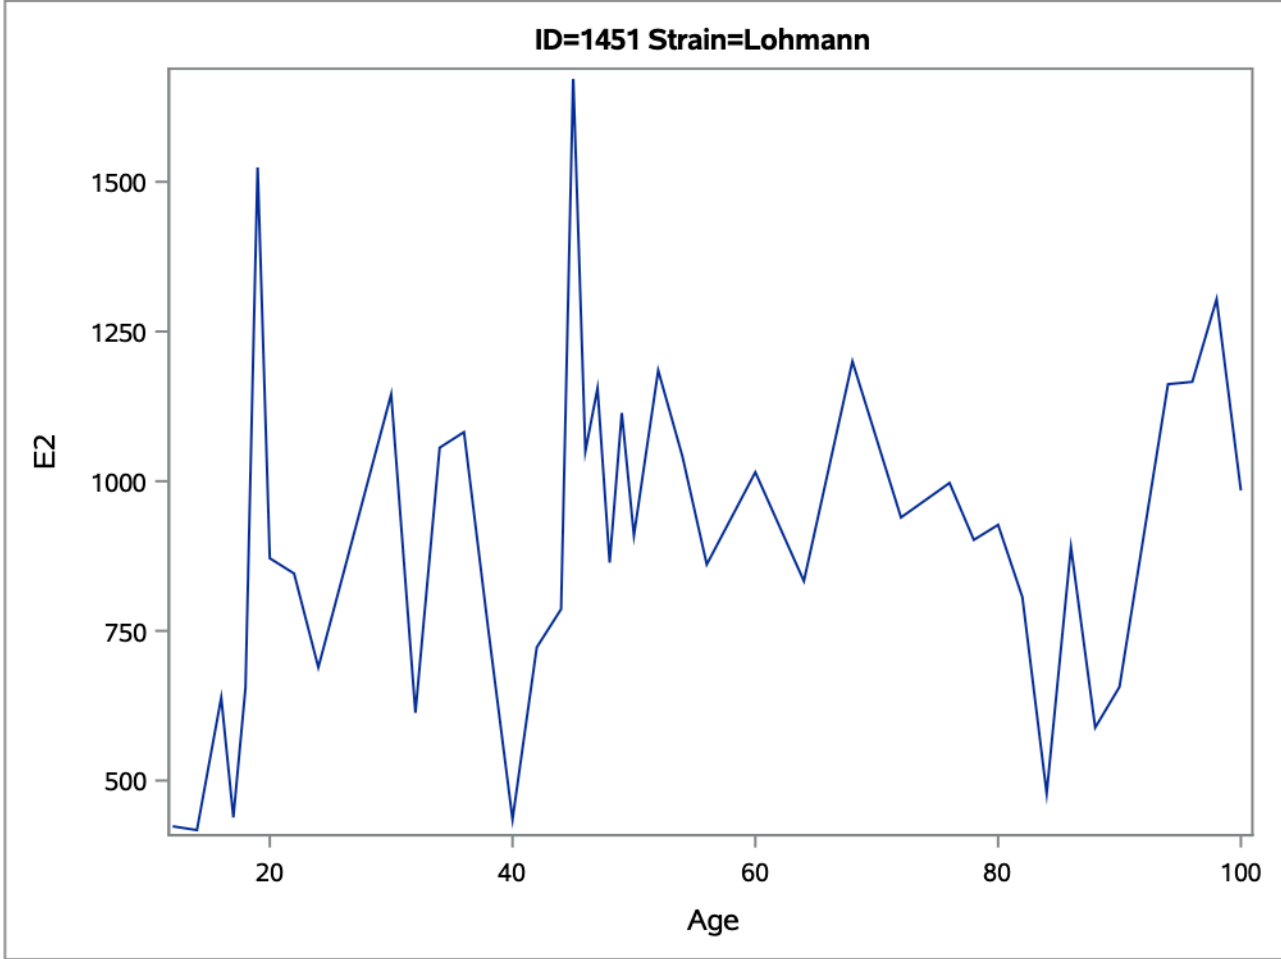



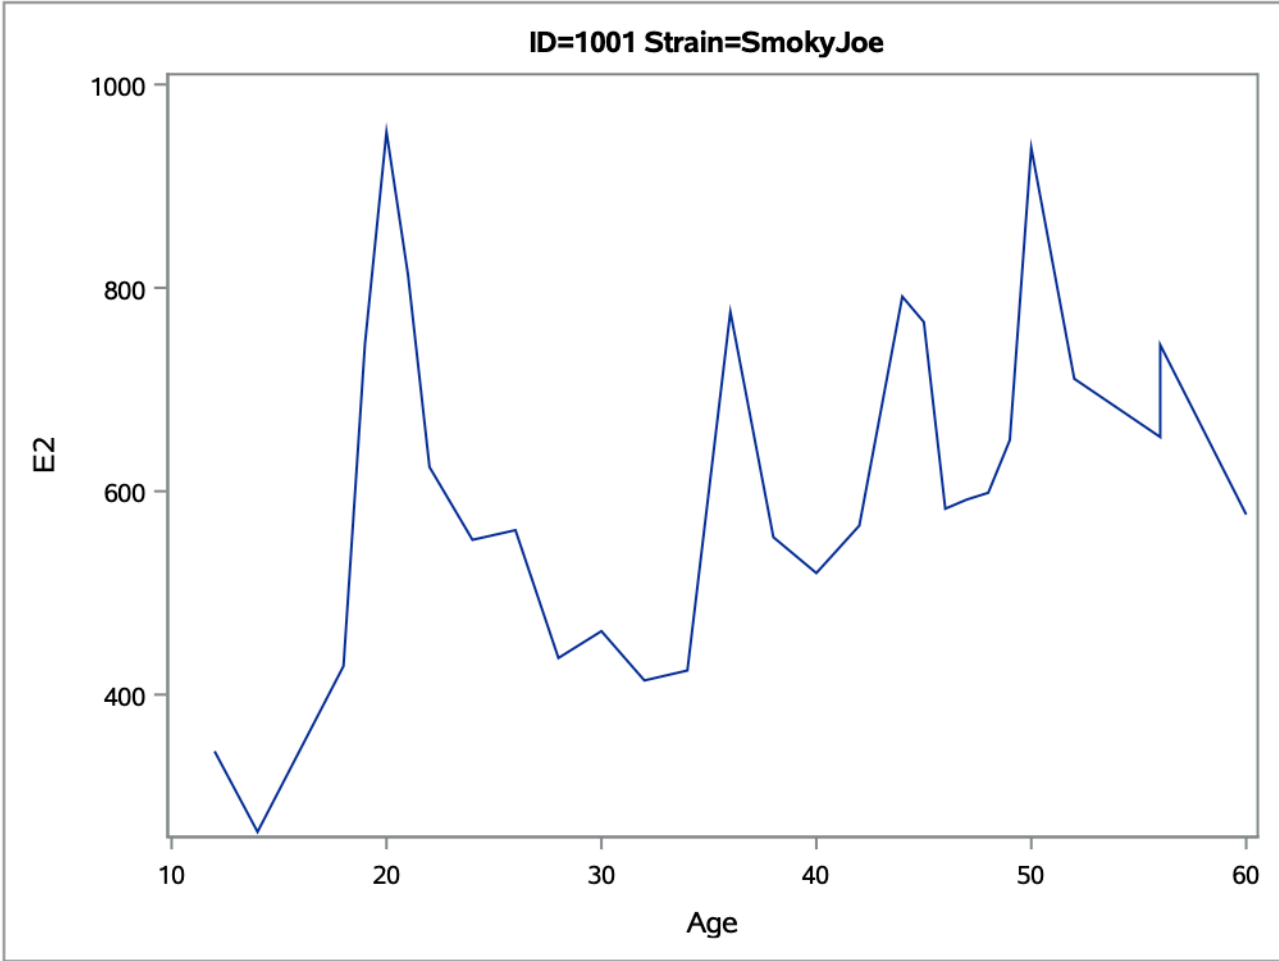

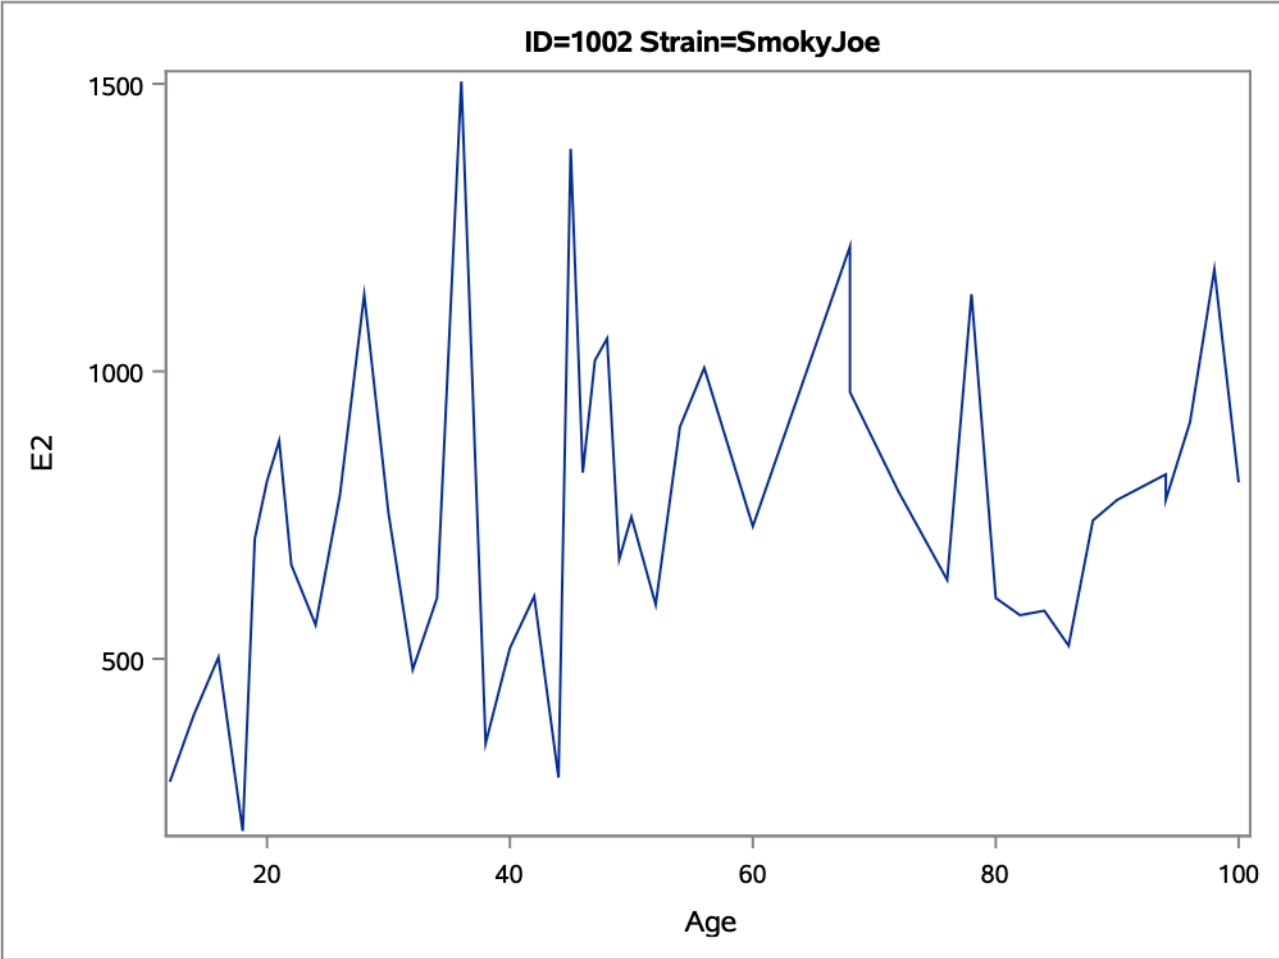

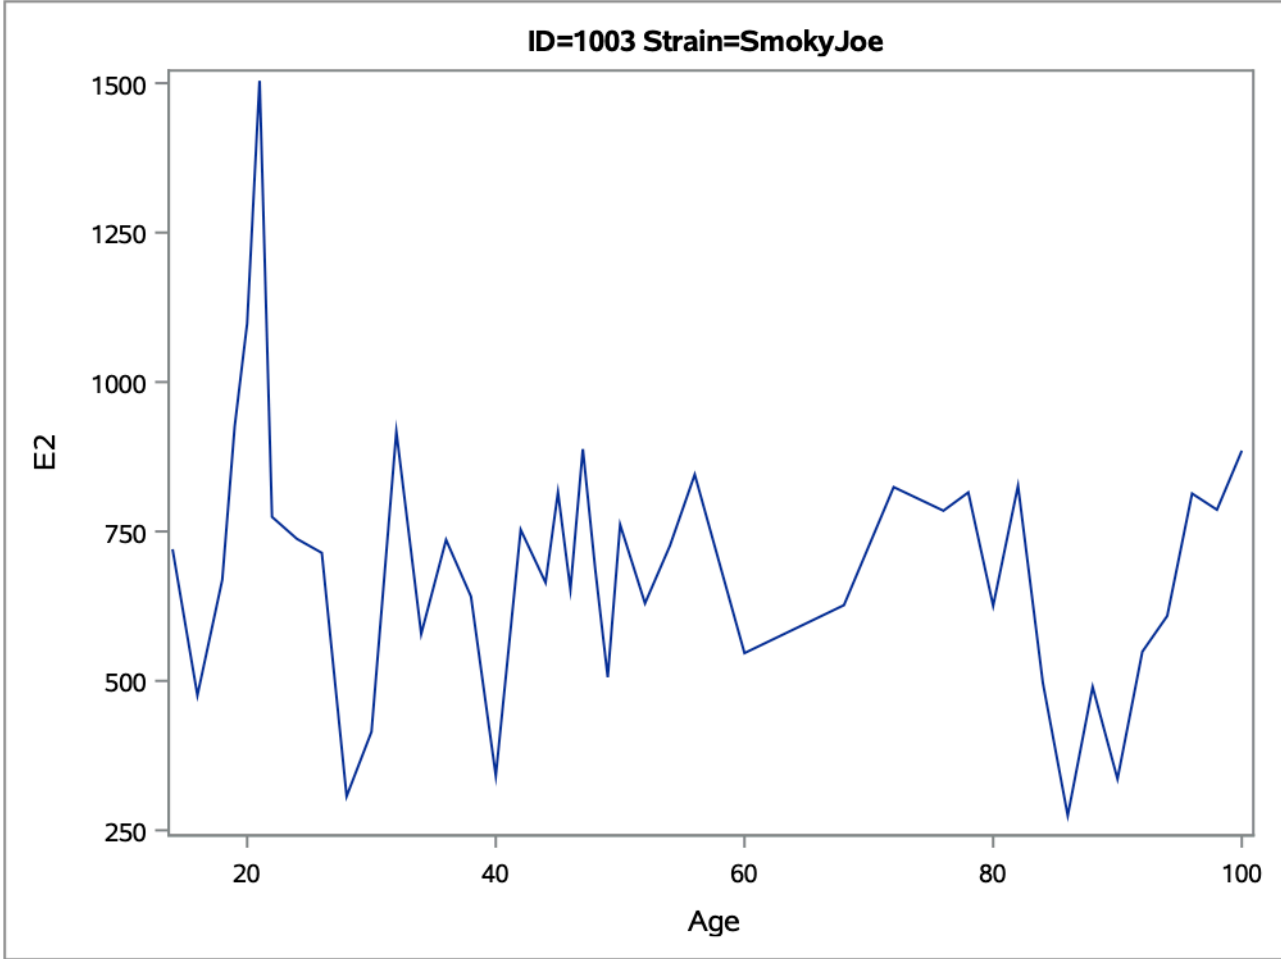

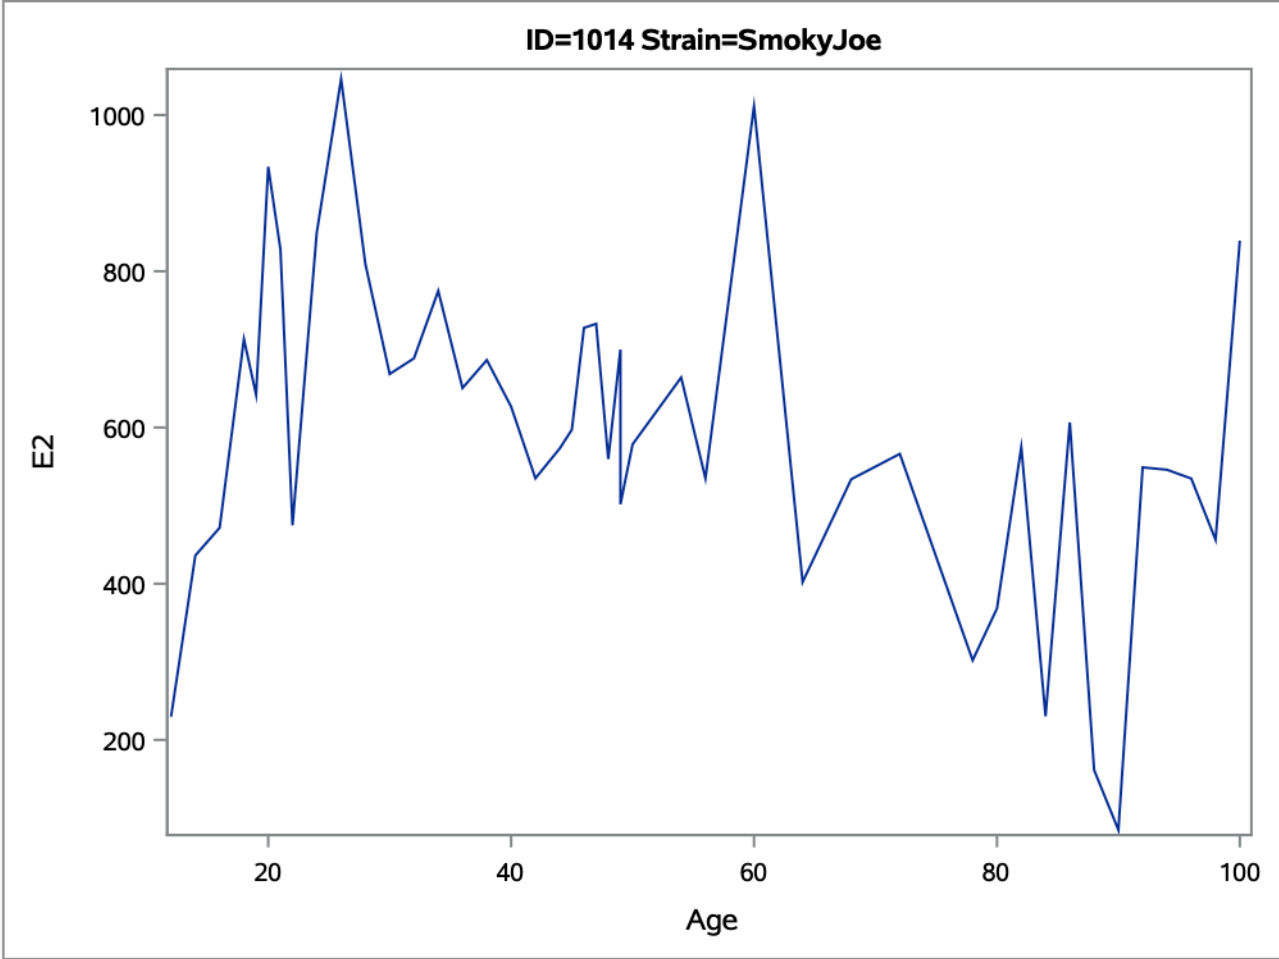

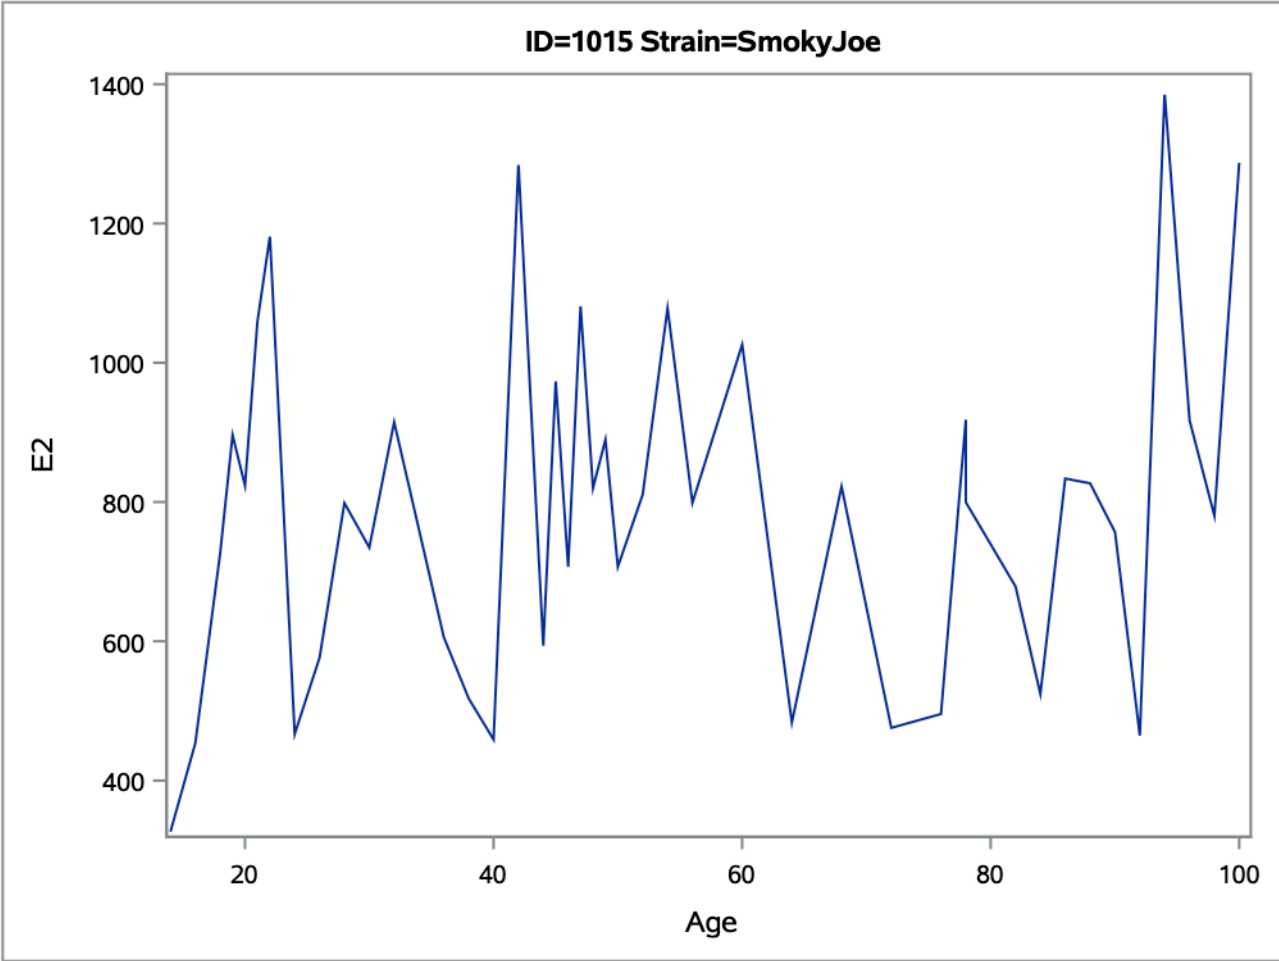

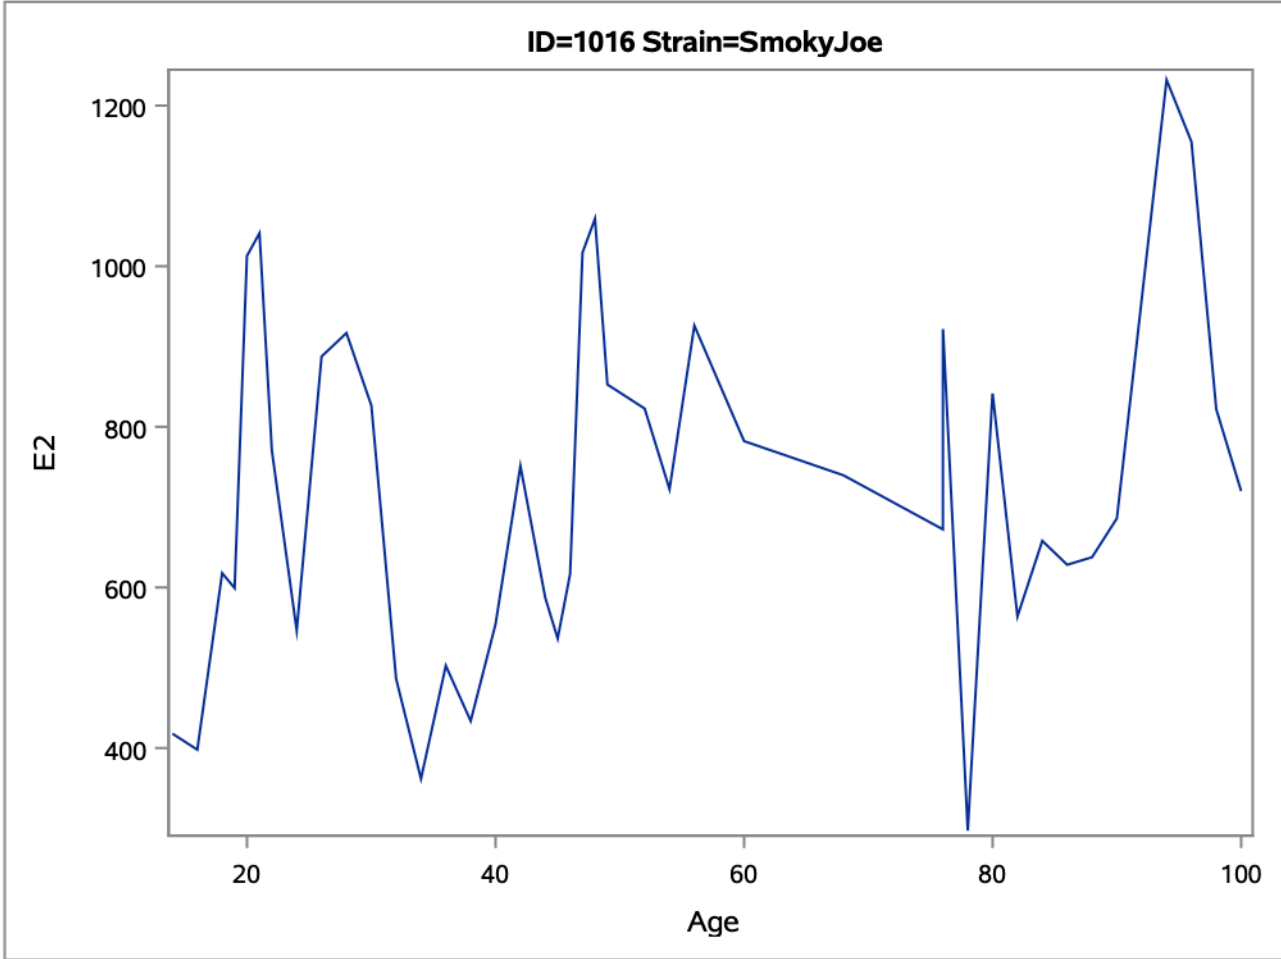

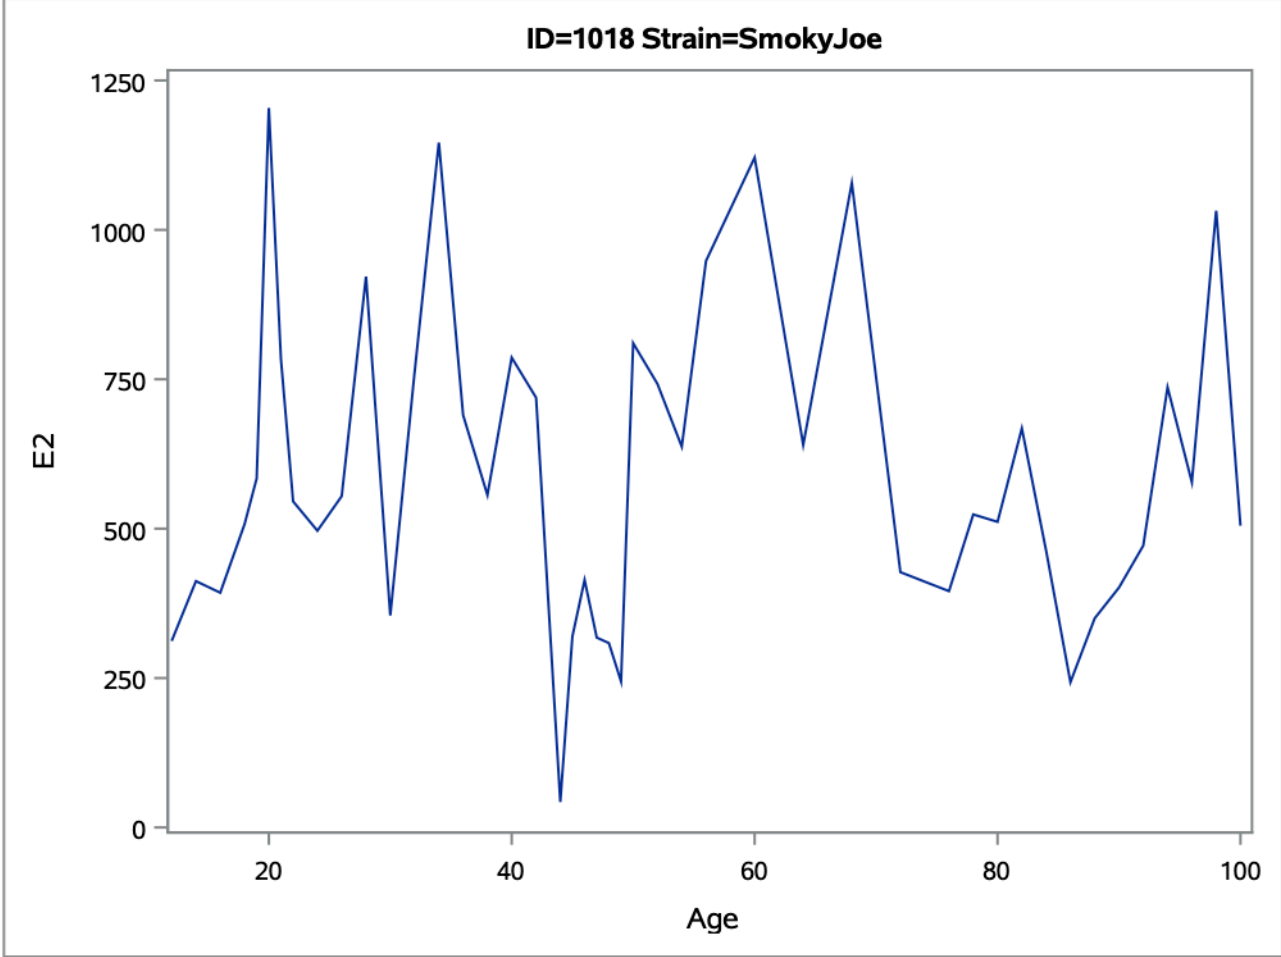

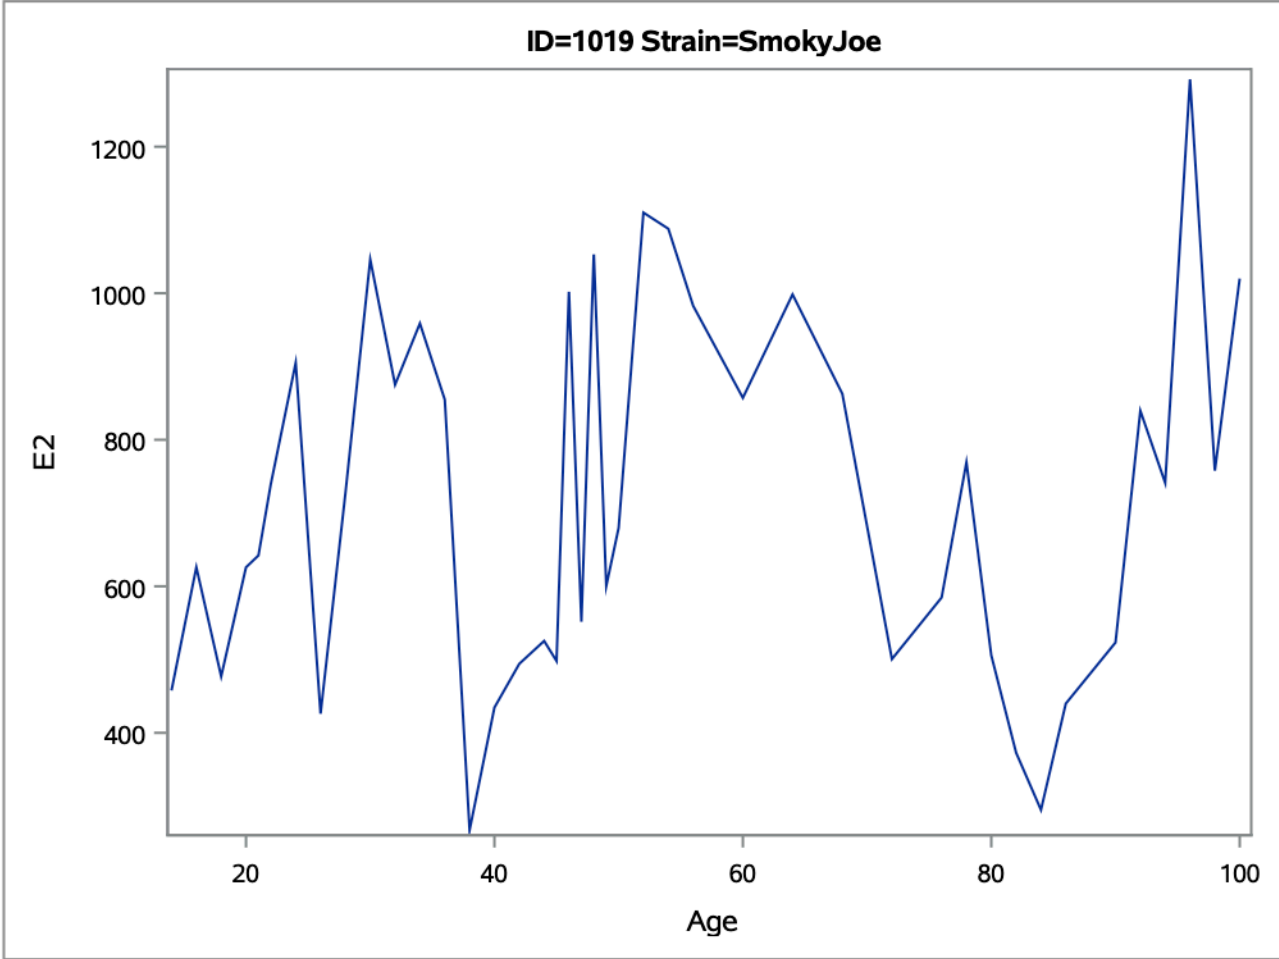



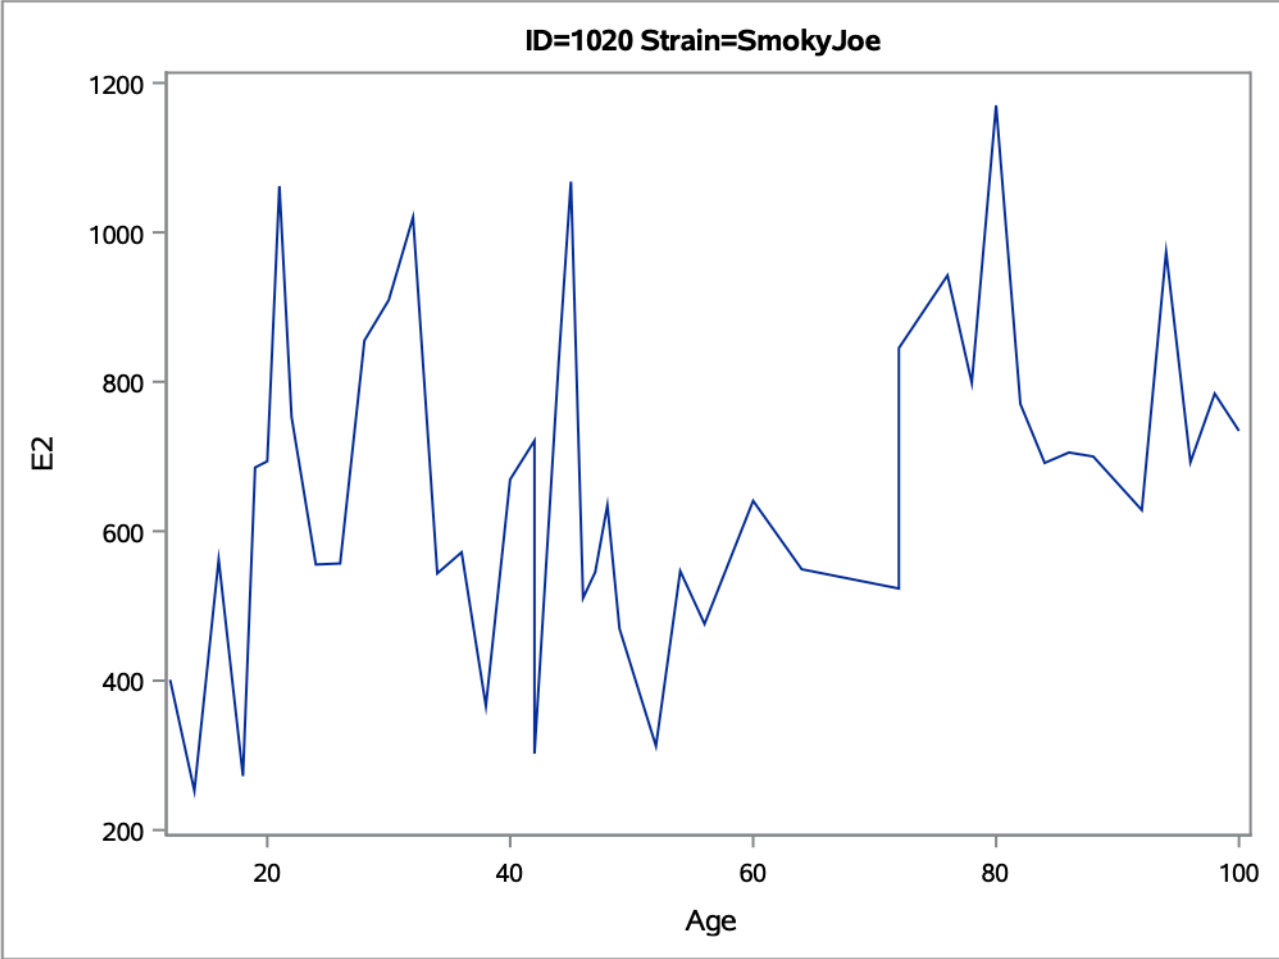

ID=1022 Strain=SmokyJoe

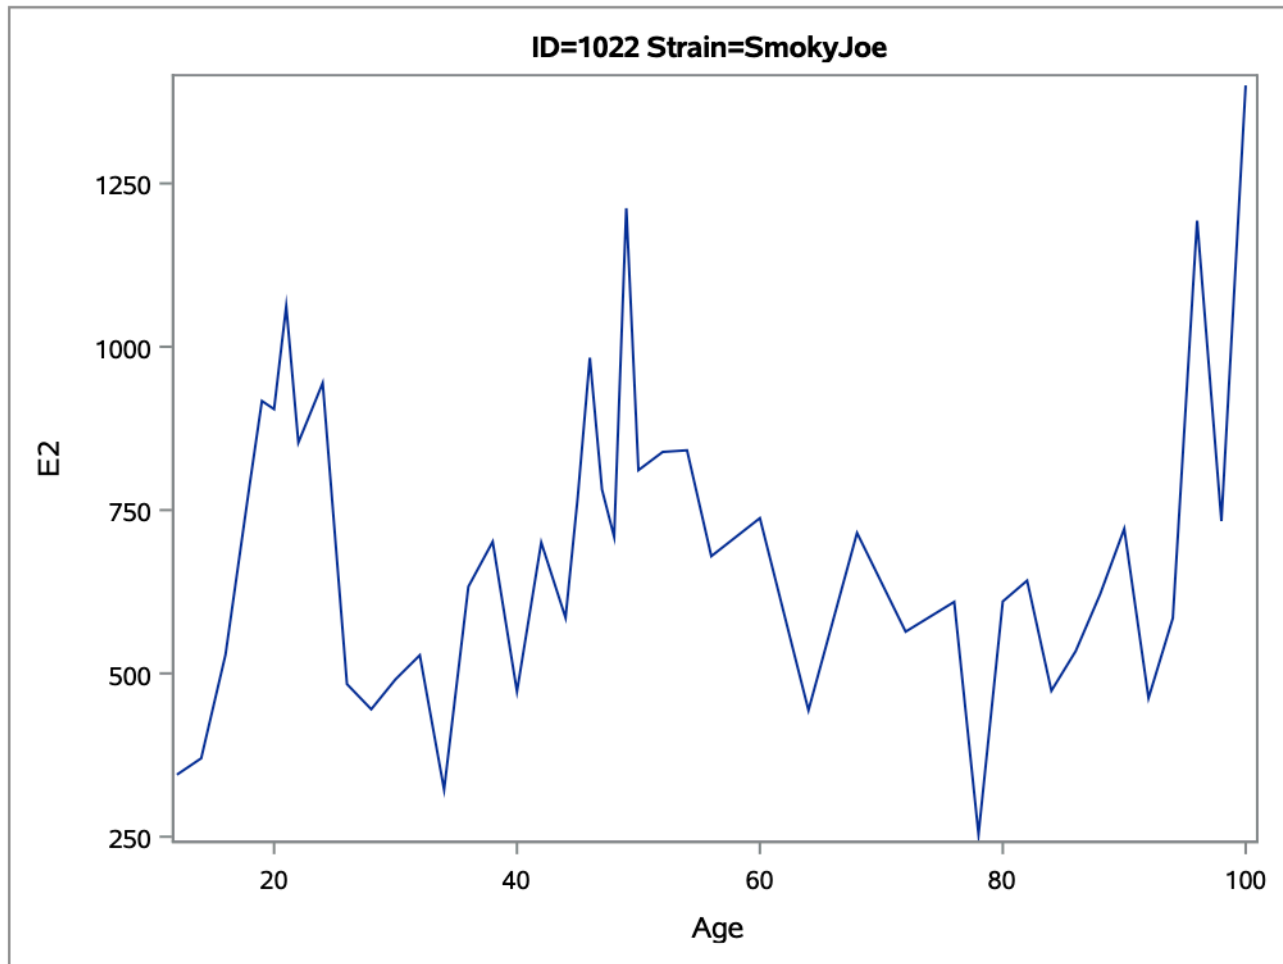

ID=1023 Strain=SmokyJoe

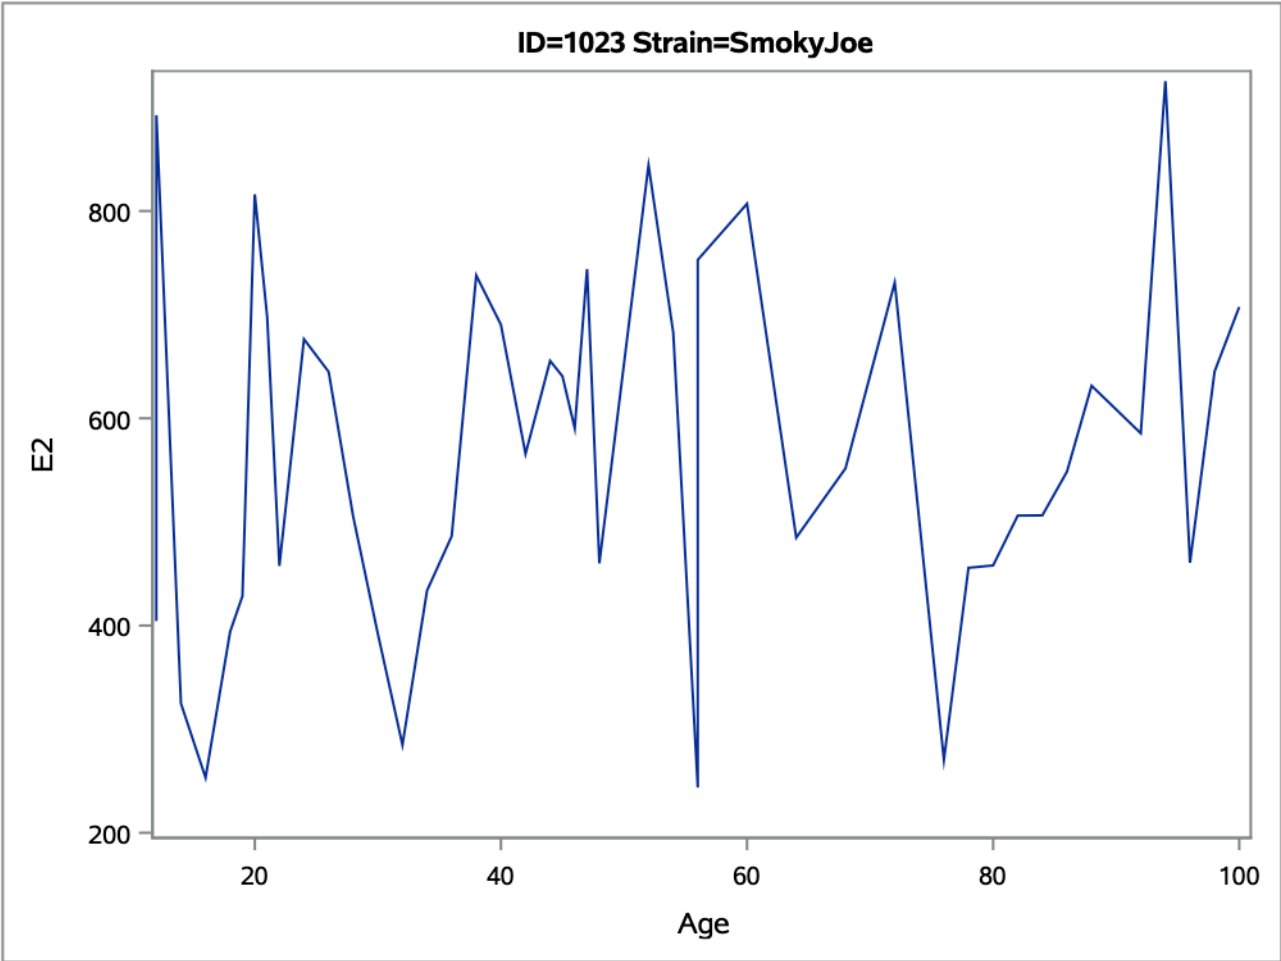

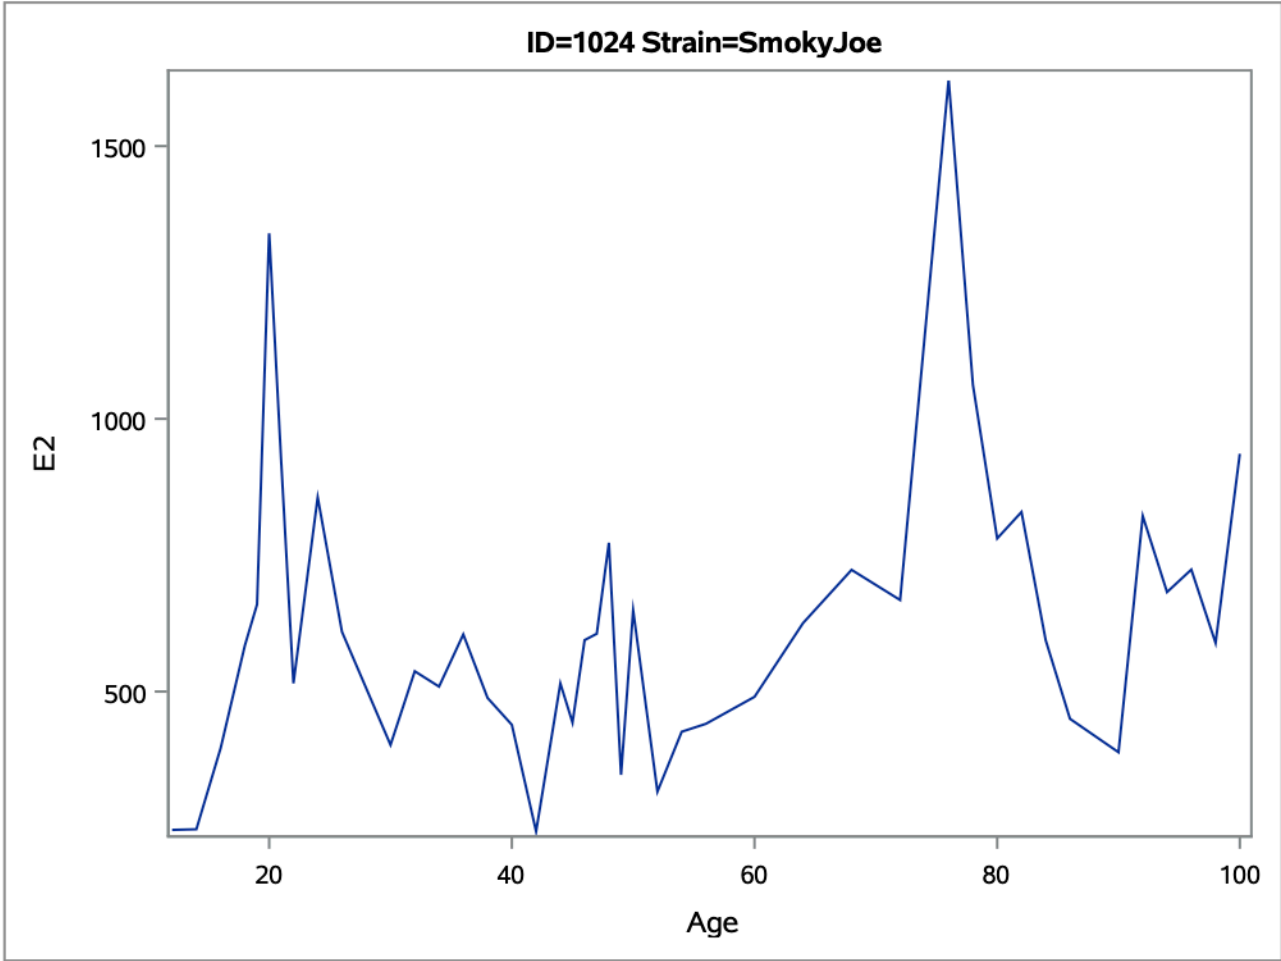

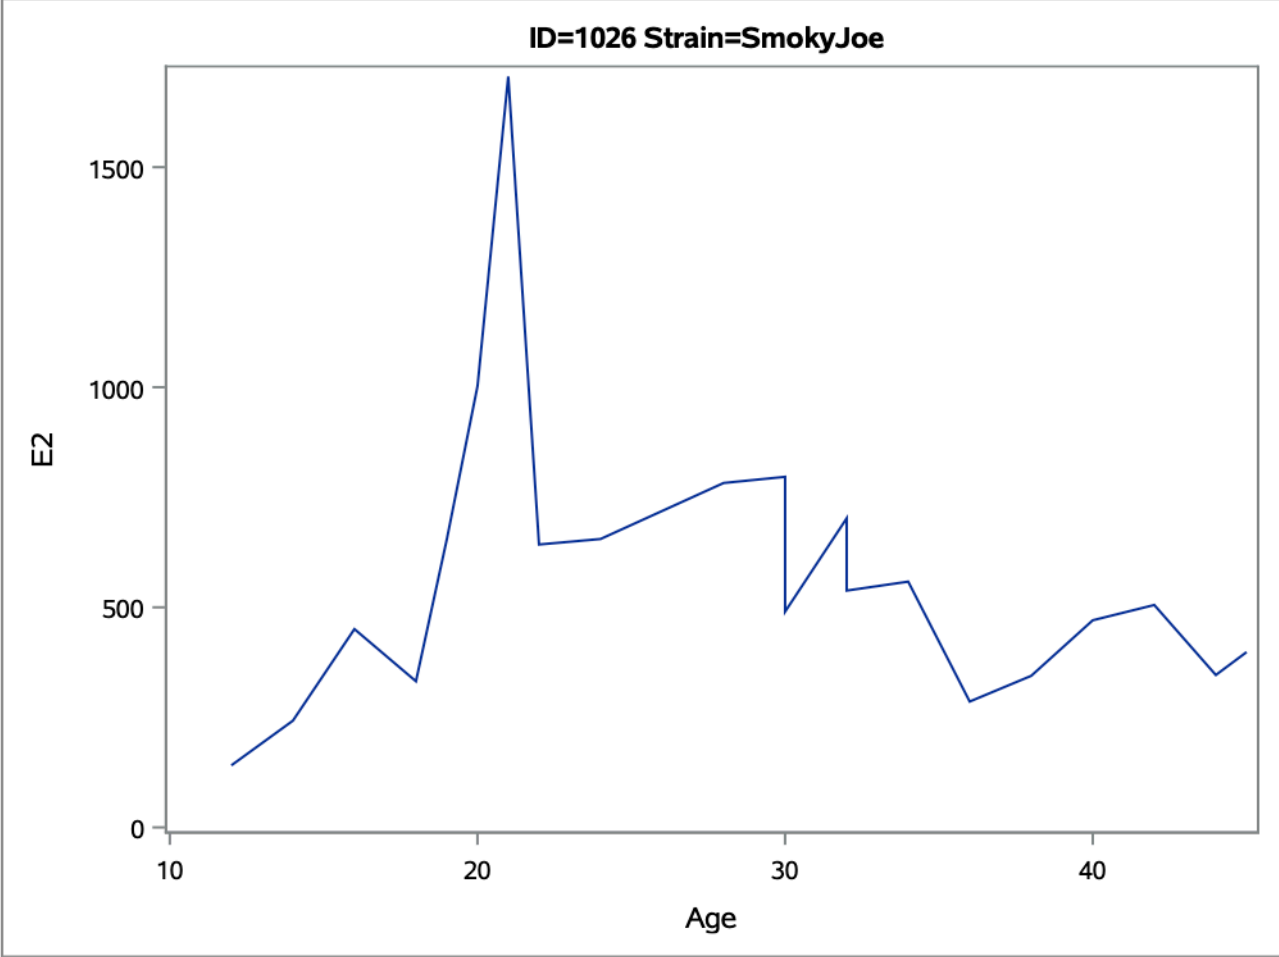

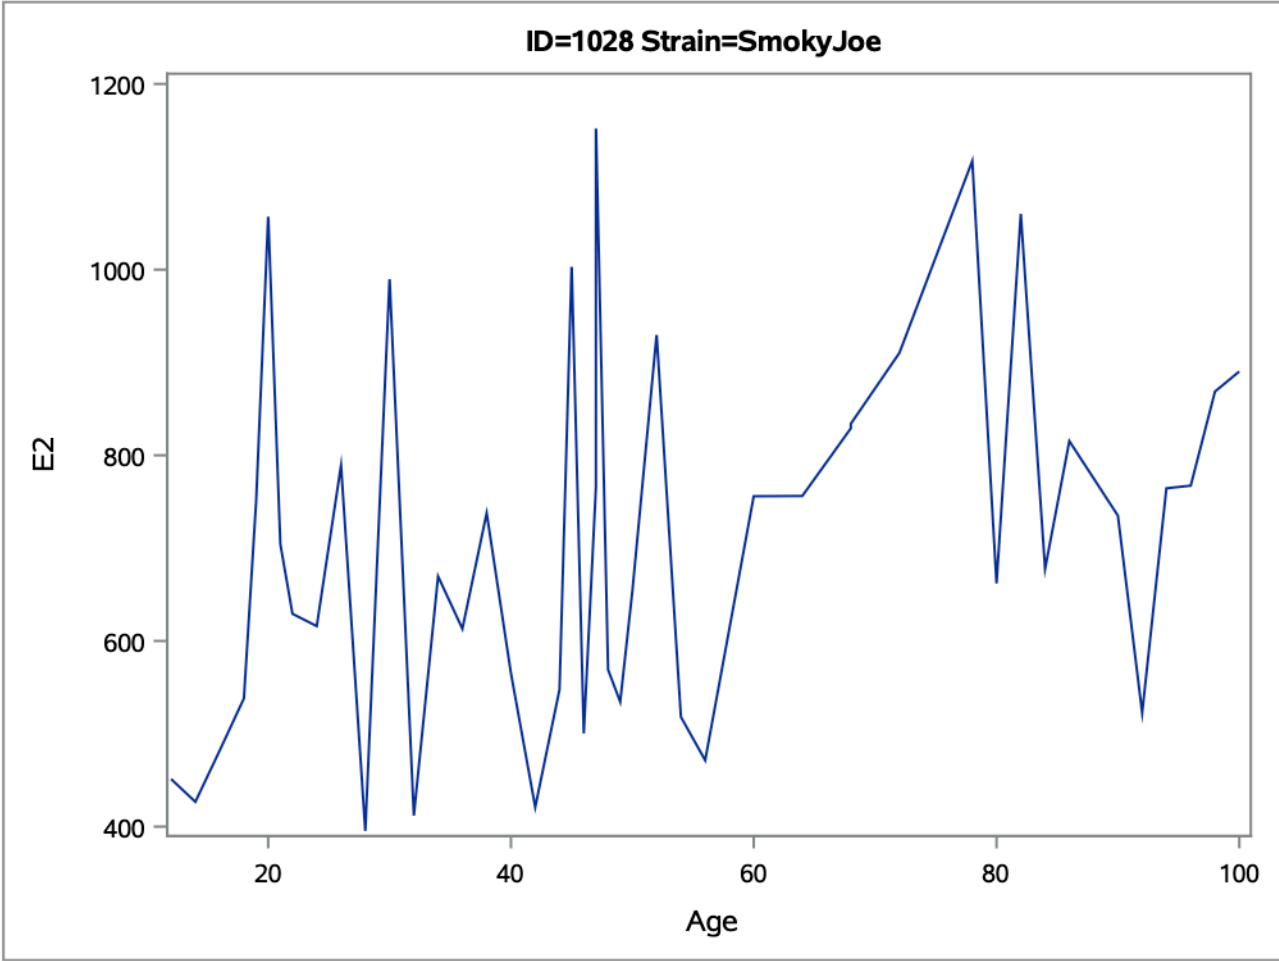

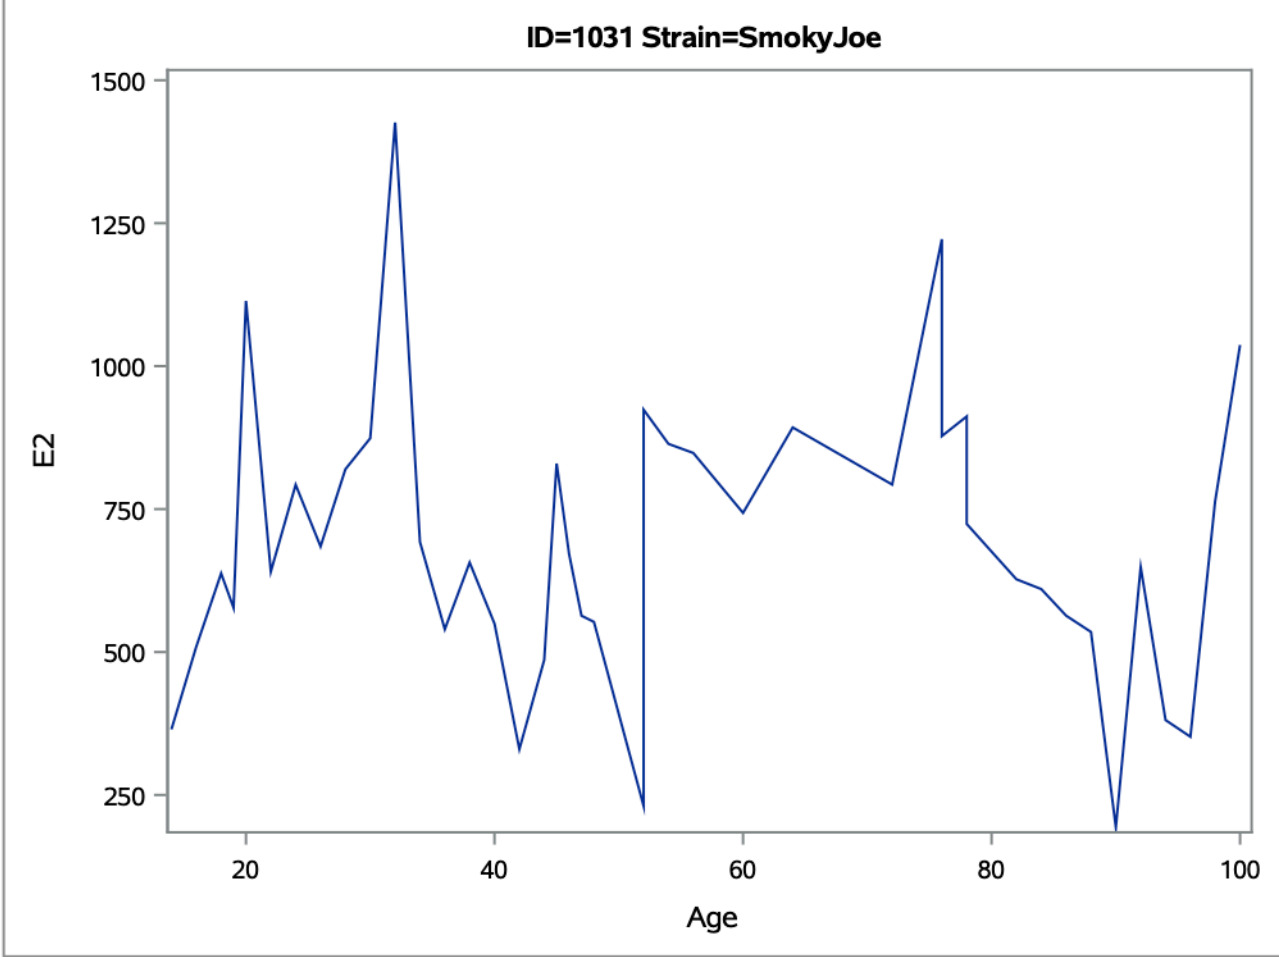

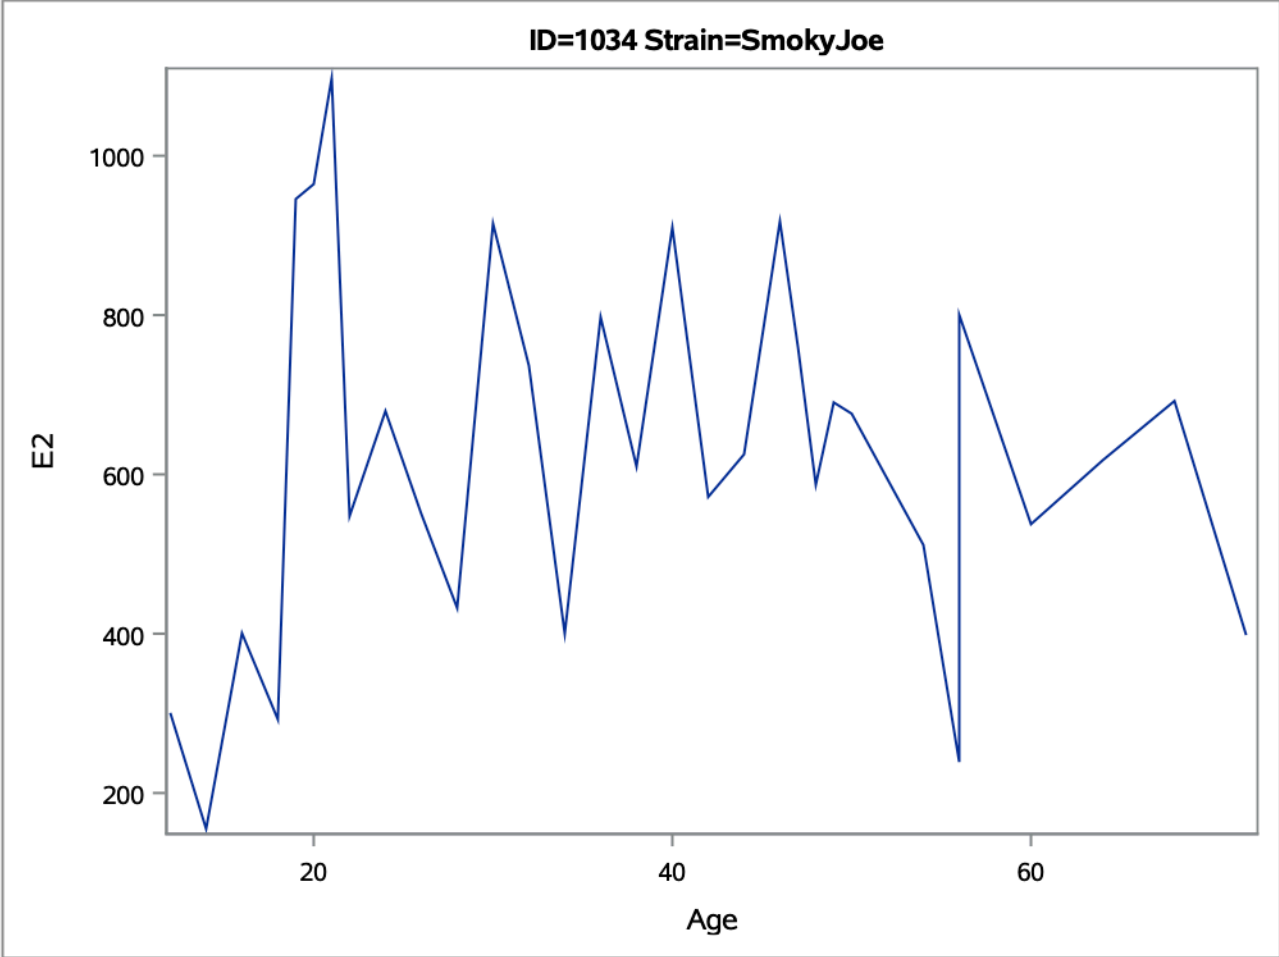



ID=1036 Strain=SmokyJoe

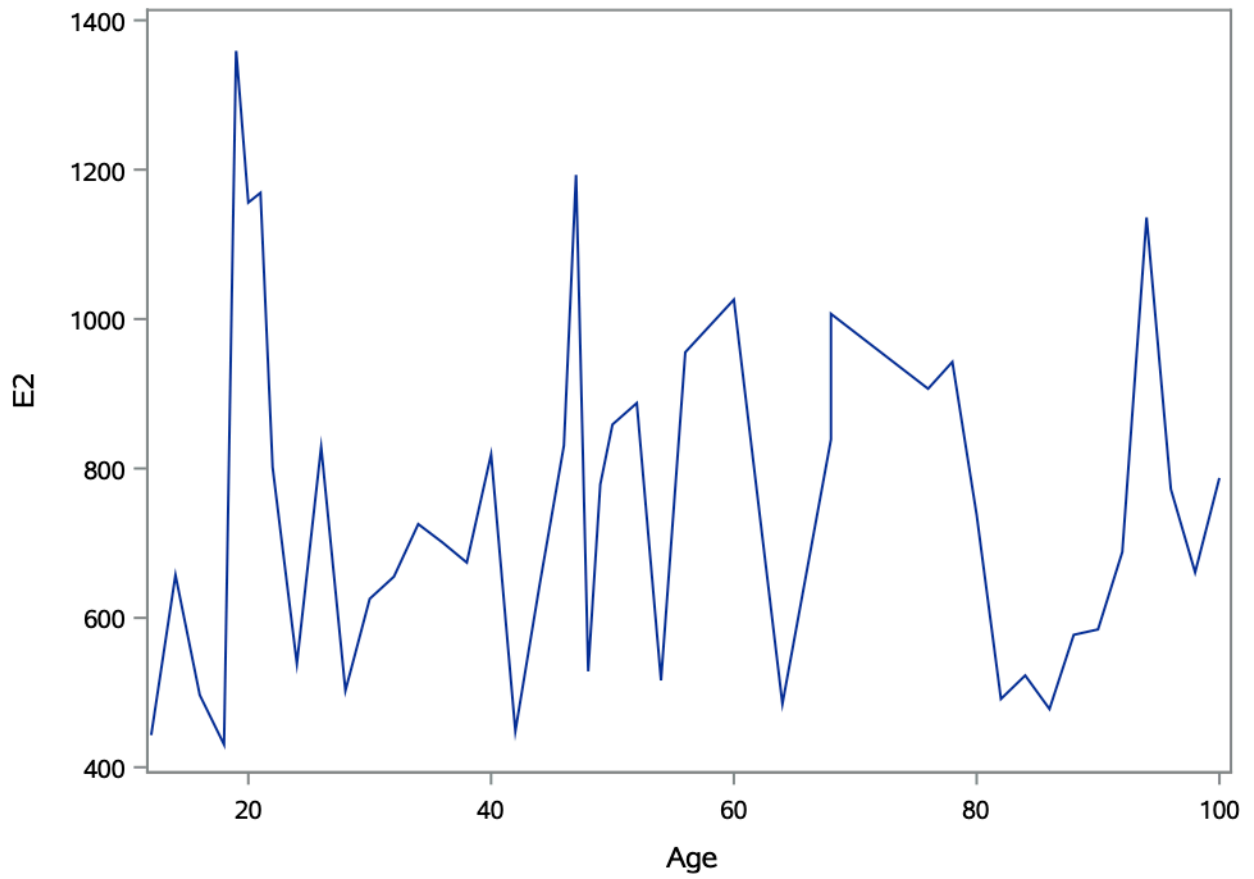

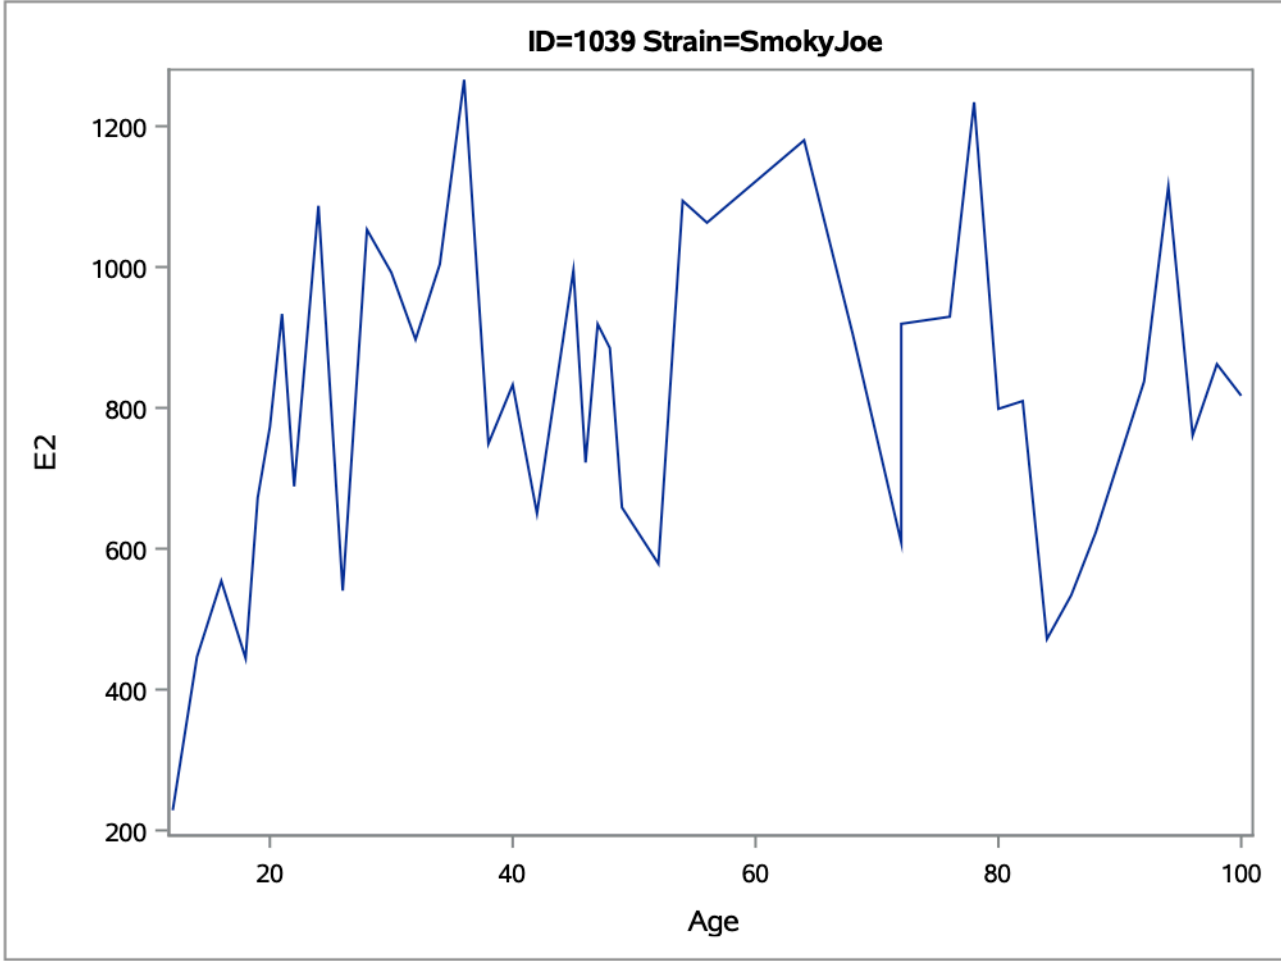

ID=1042 Strain=SmokyJoe

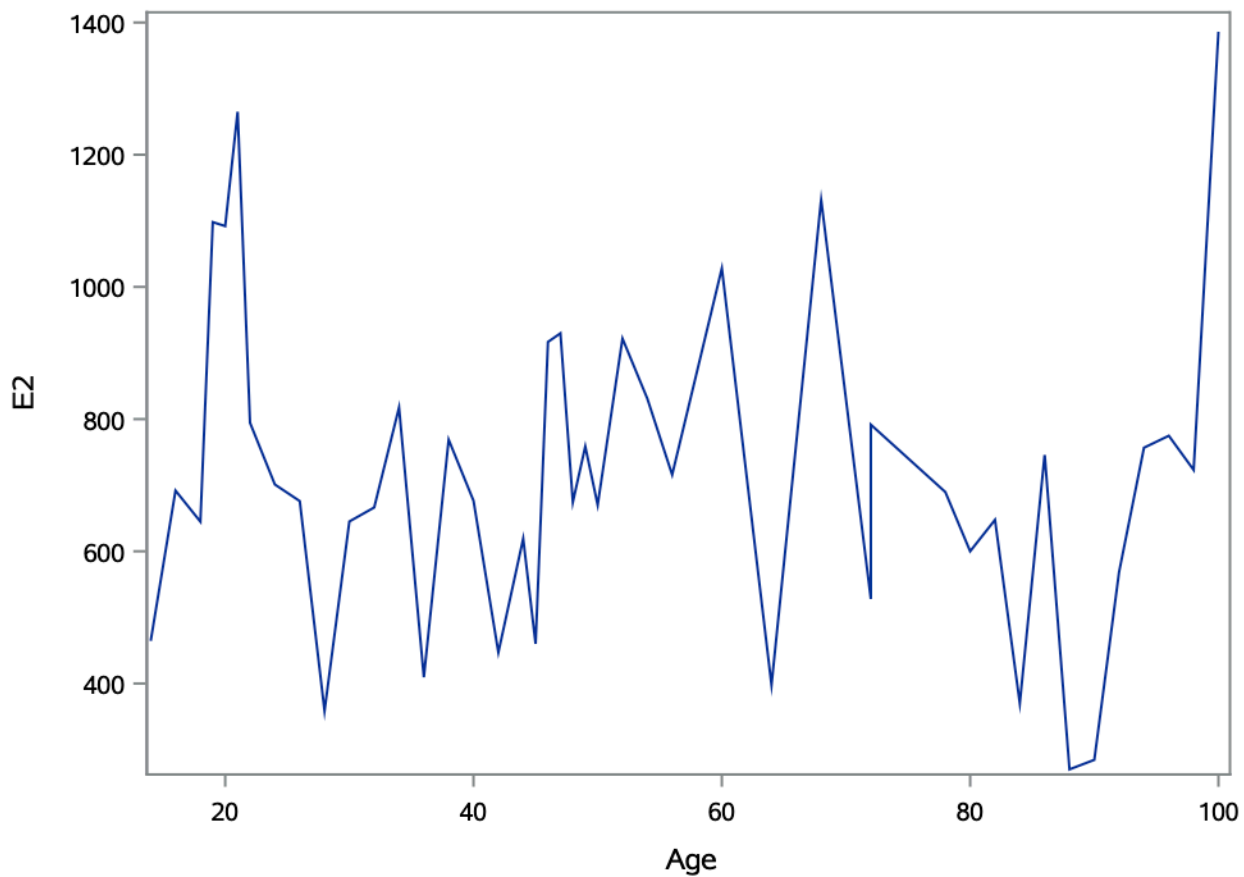

ID=1043 Strain=SmokyJoe

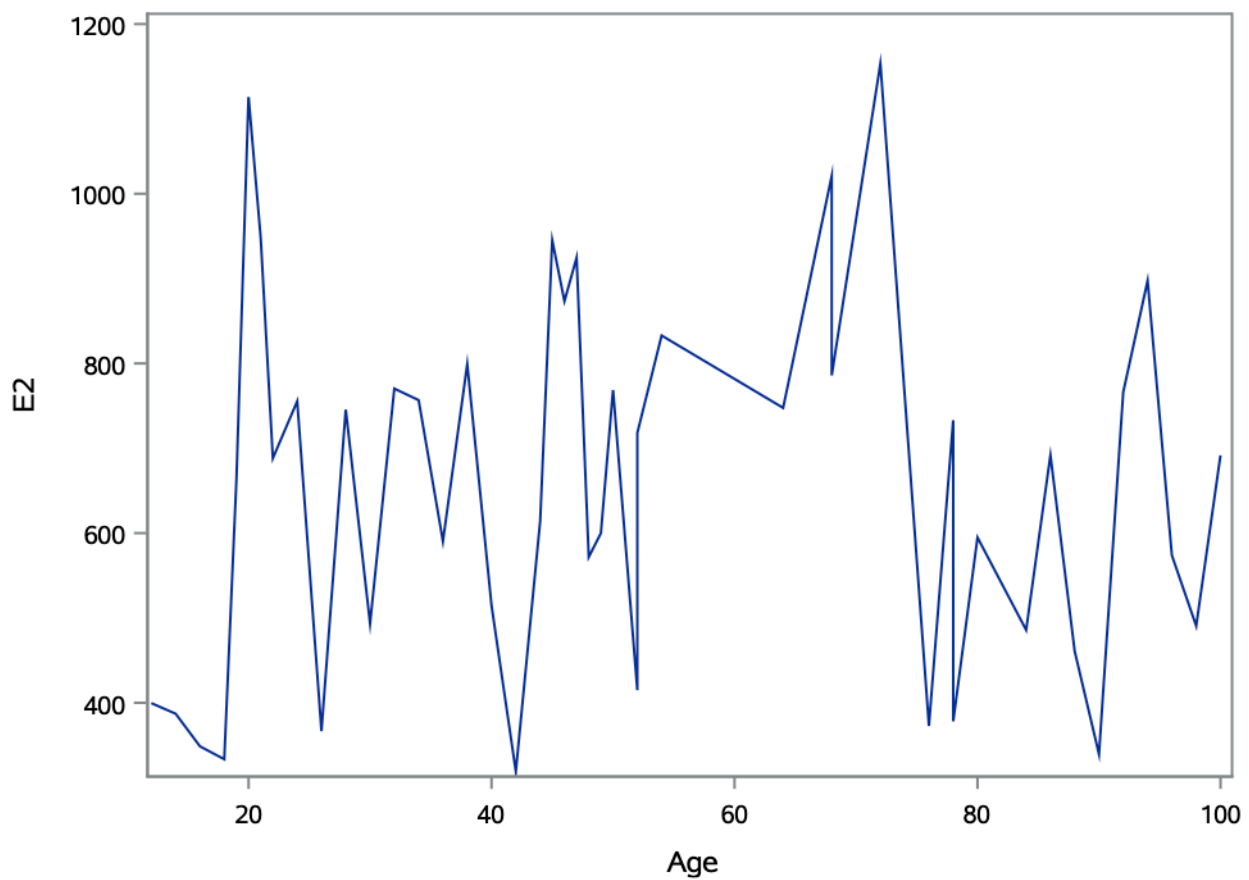

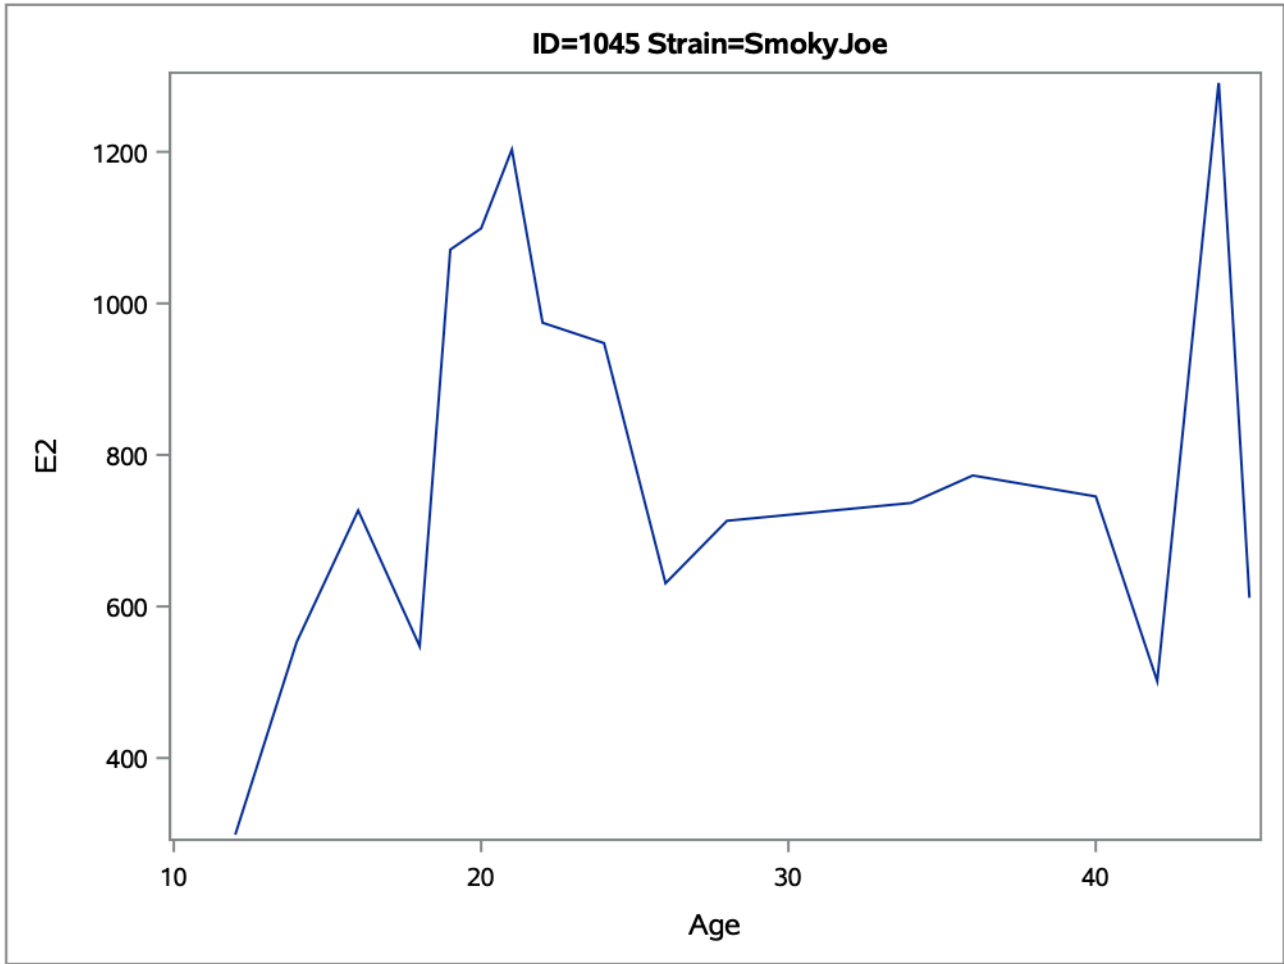

ID=1049 Strain=SmokyJoe

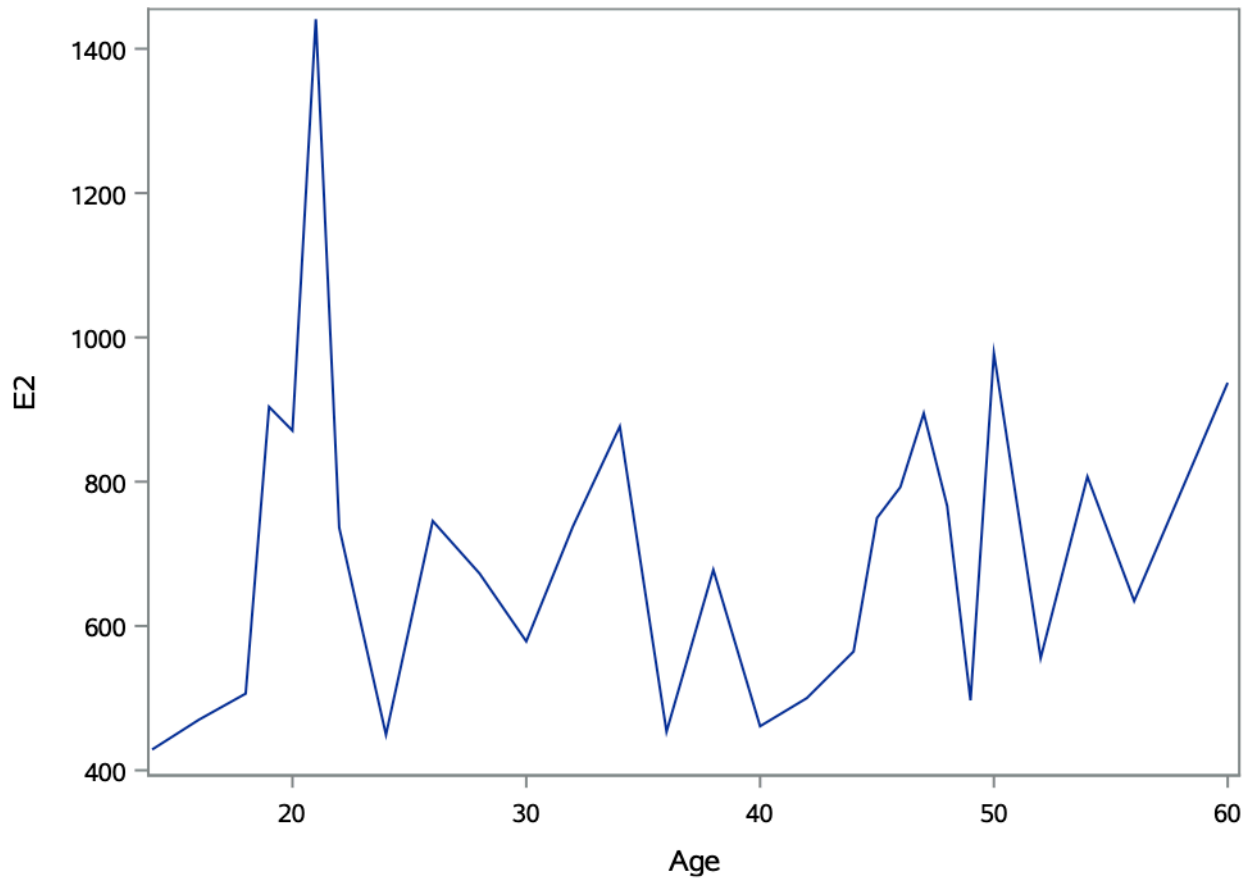

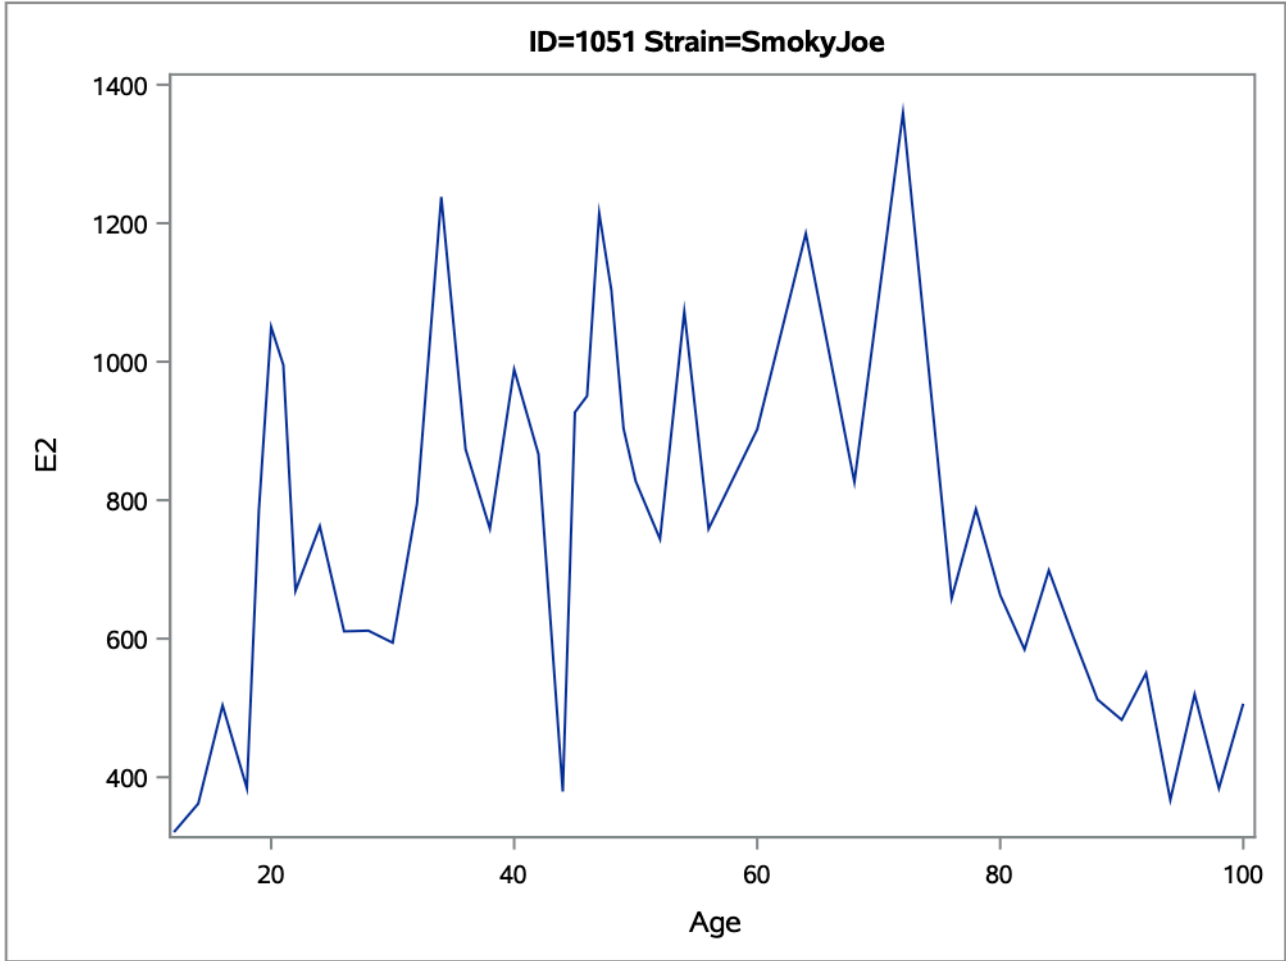

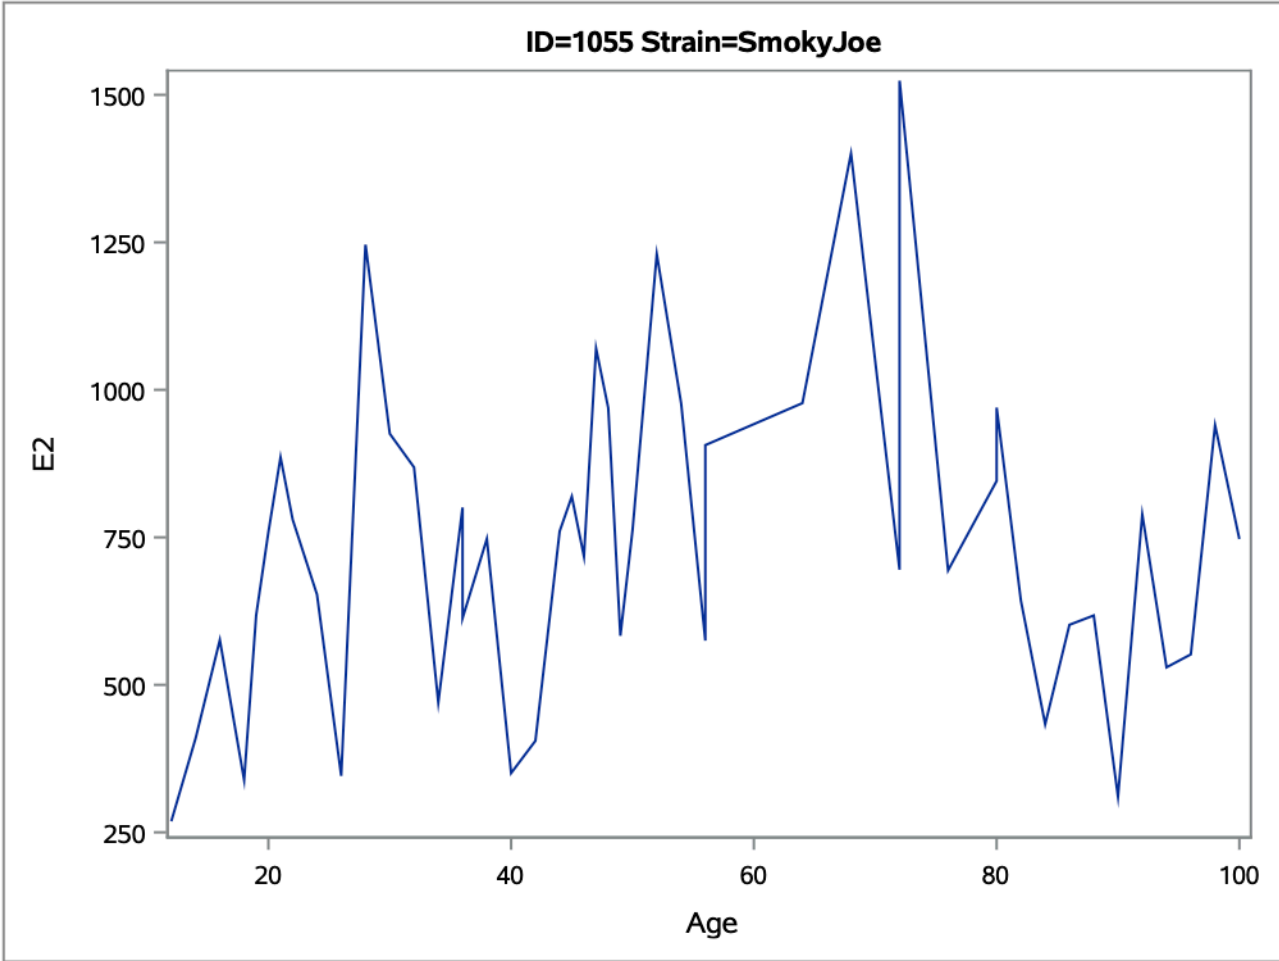



ID=1058 Strain=SmokyJoe

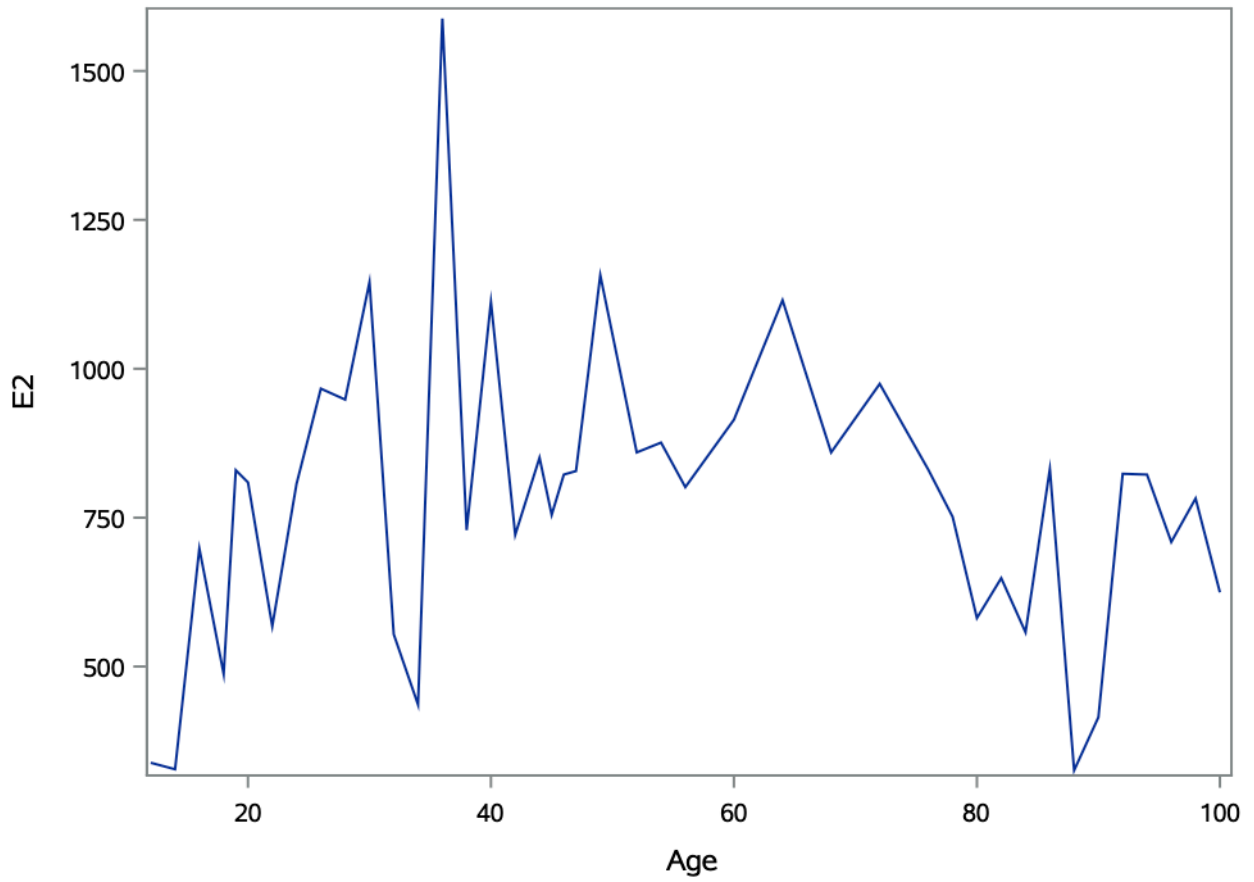

ID=1059 Strain=SmokyJoe

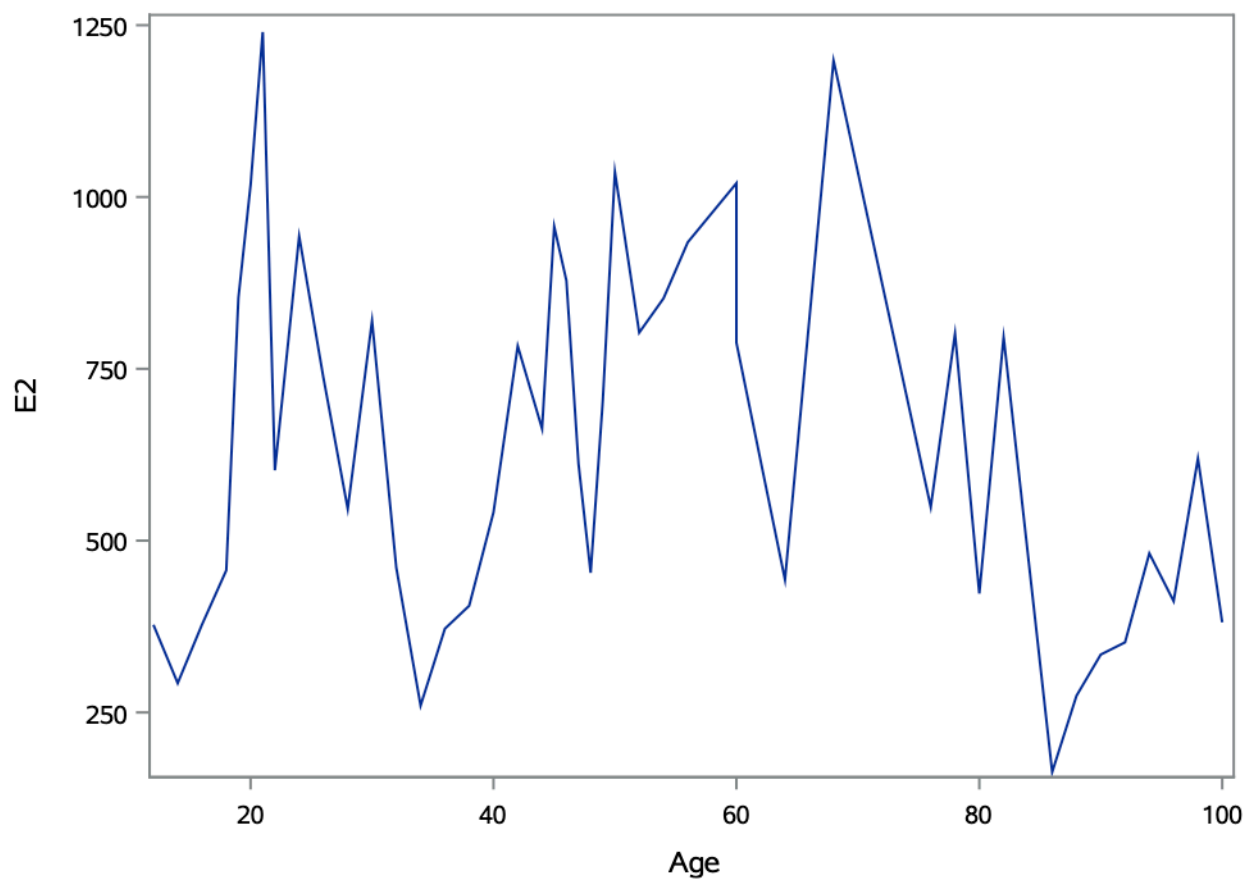

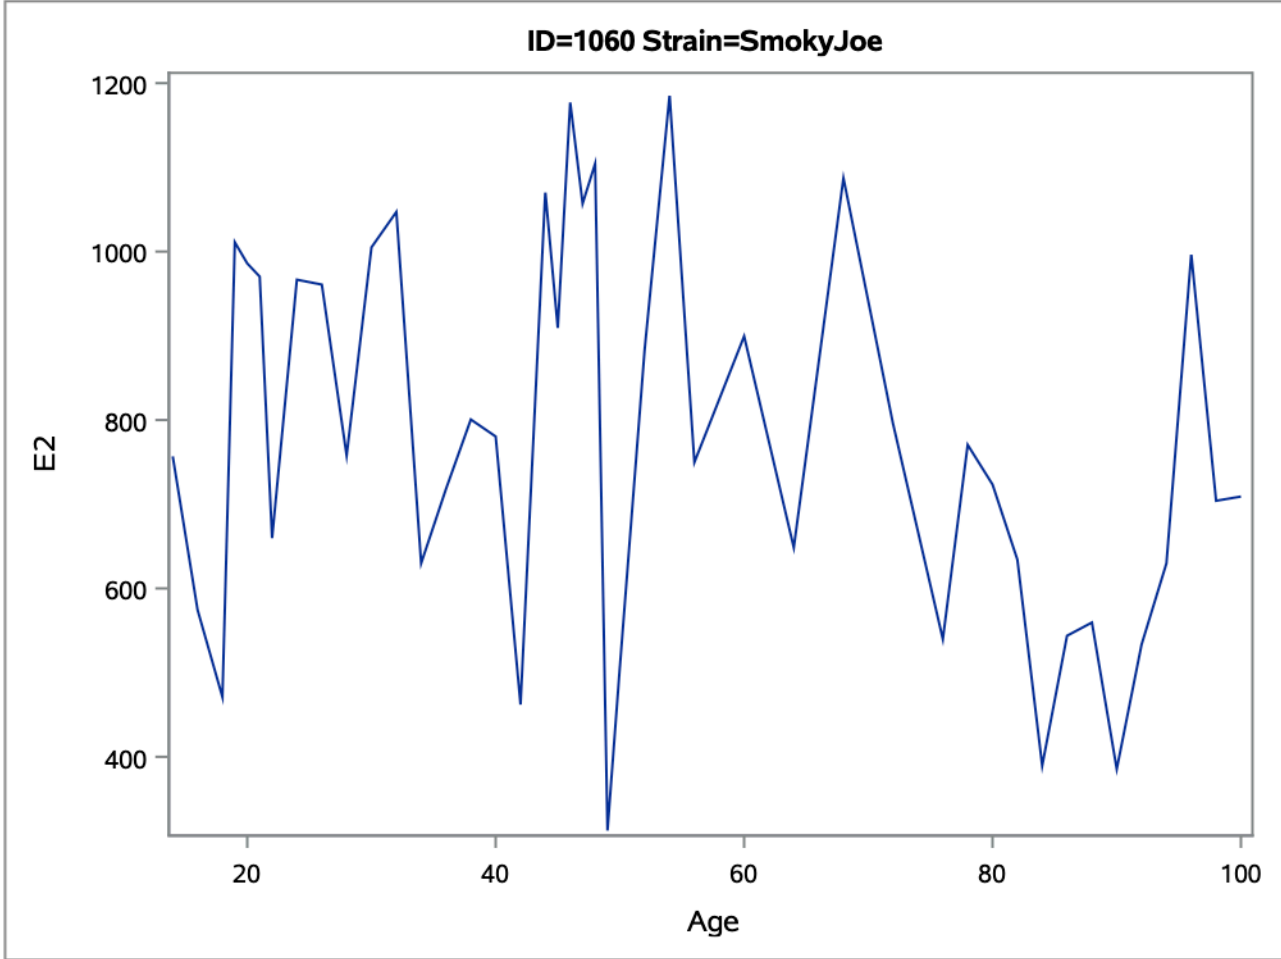

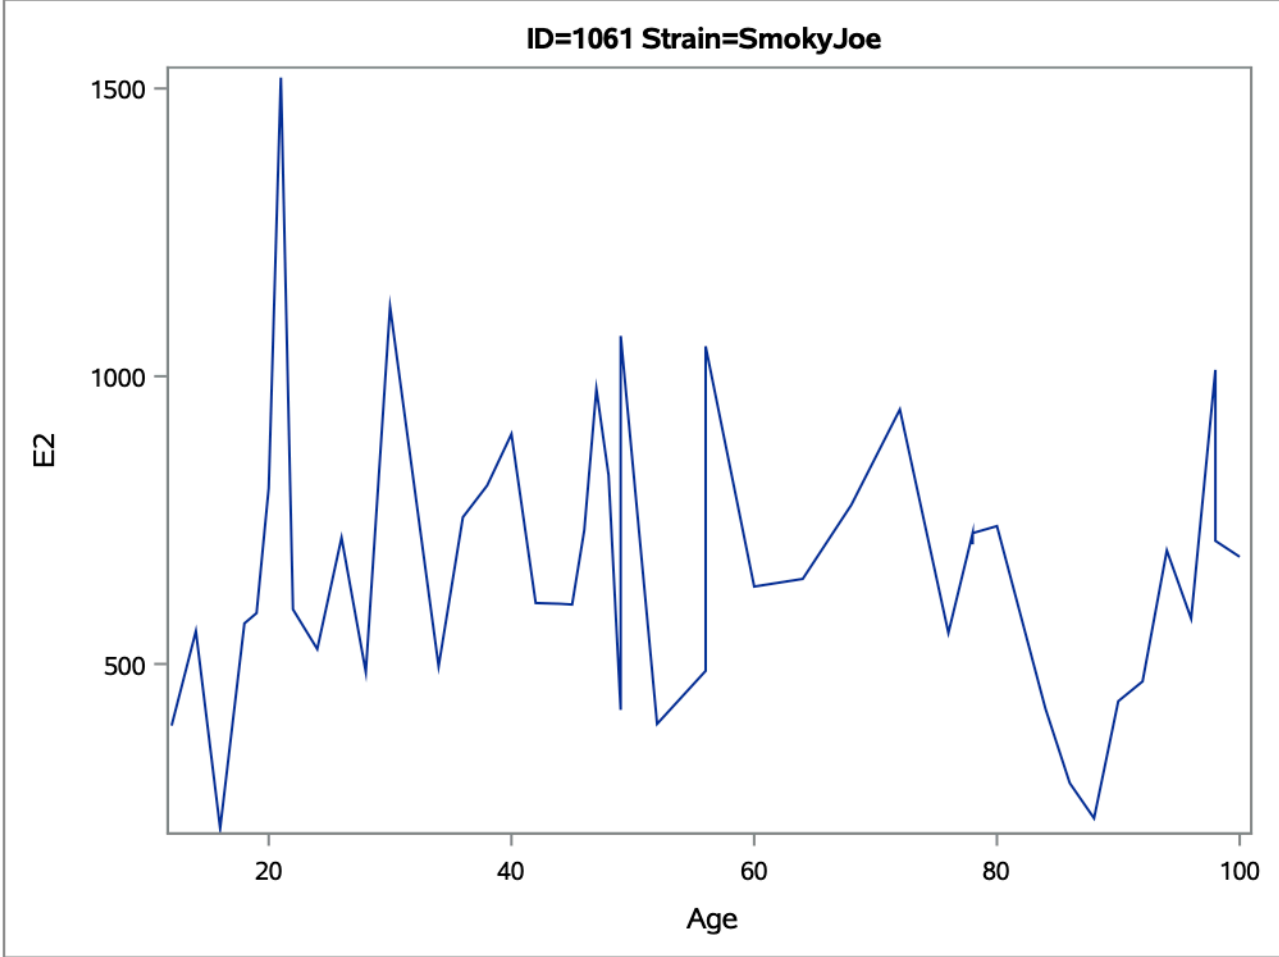

ID=1062 Strain=SmokyJoe

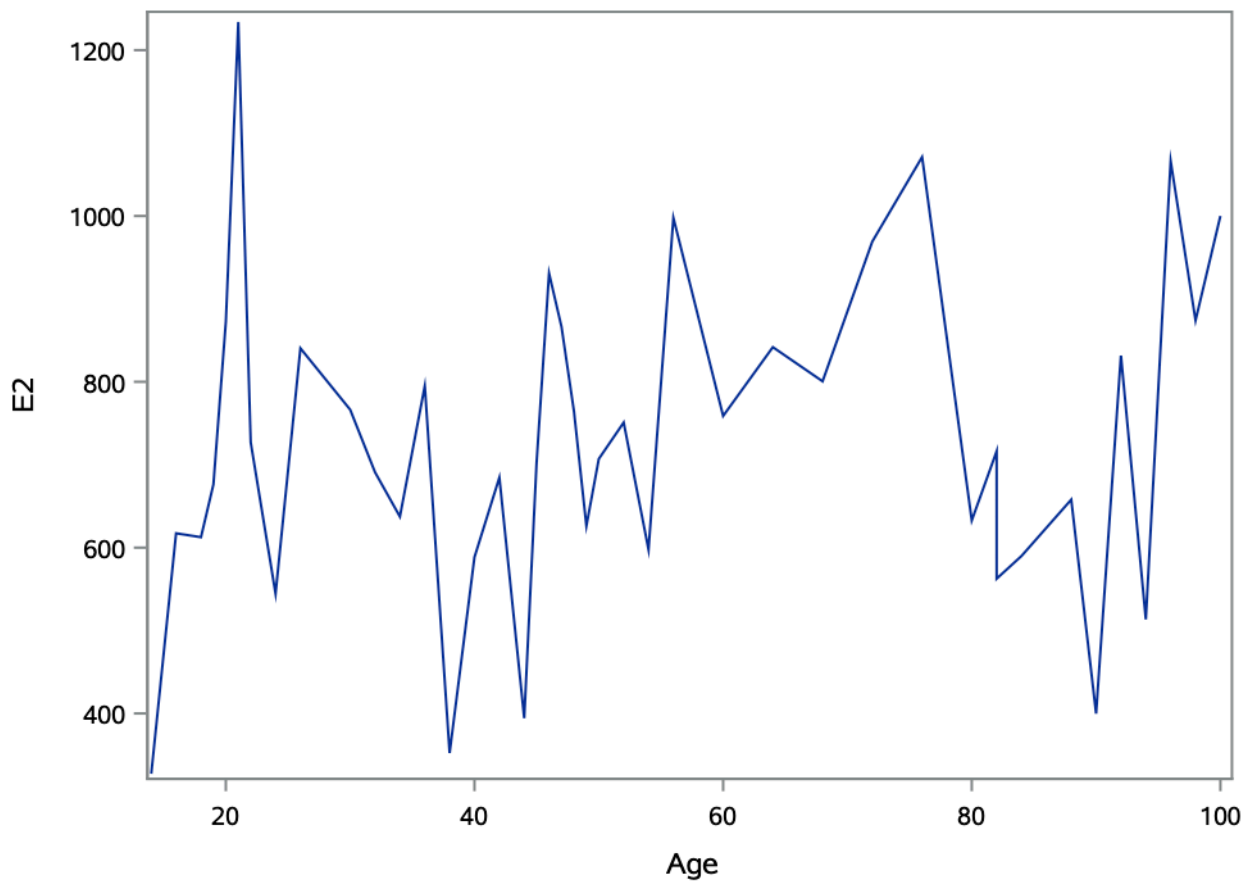

ID=1064 Strain=SmokyJoe

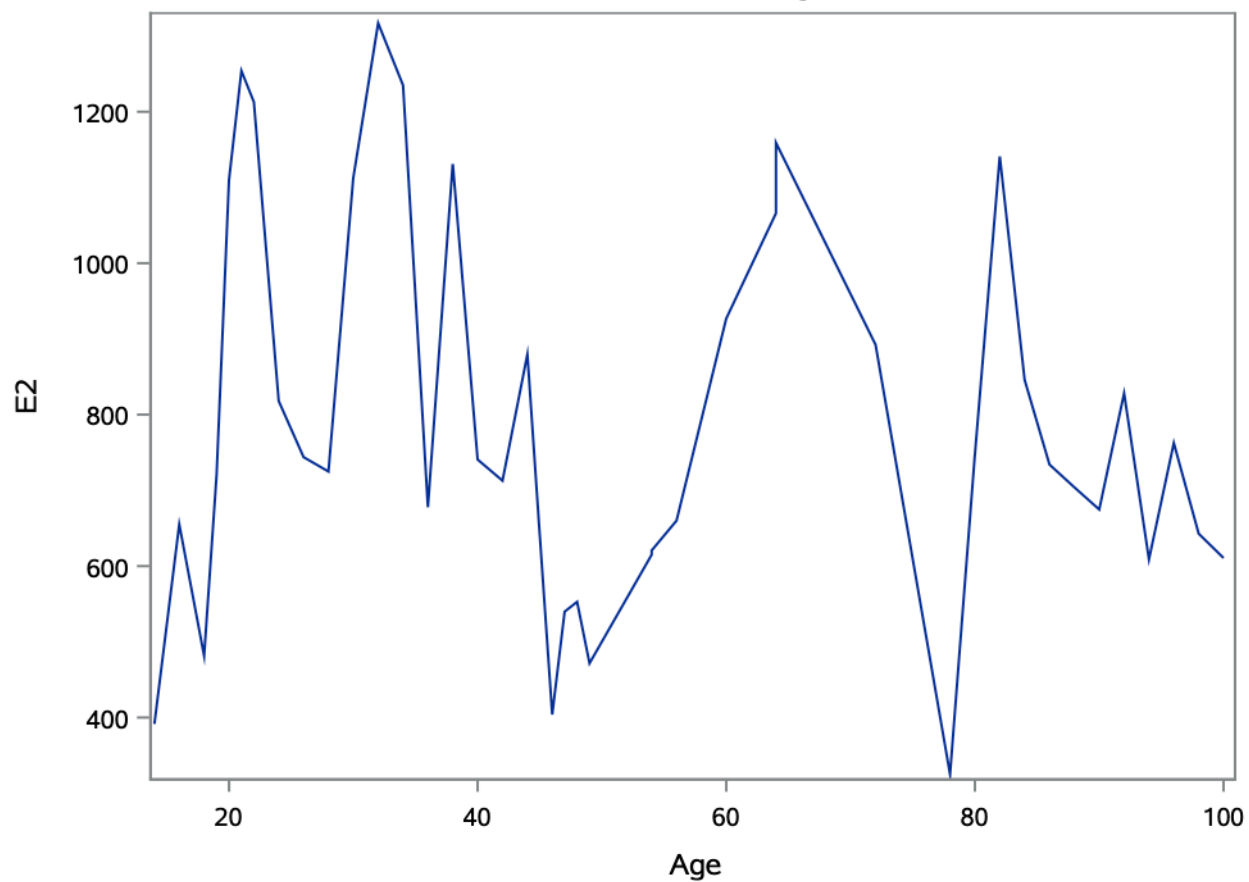

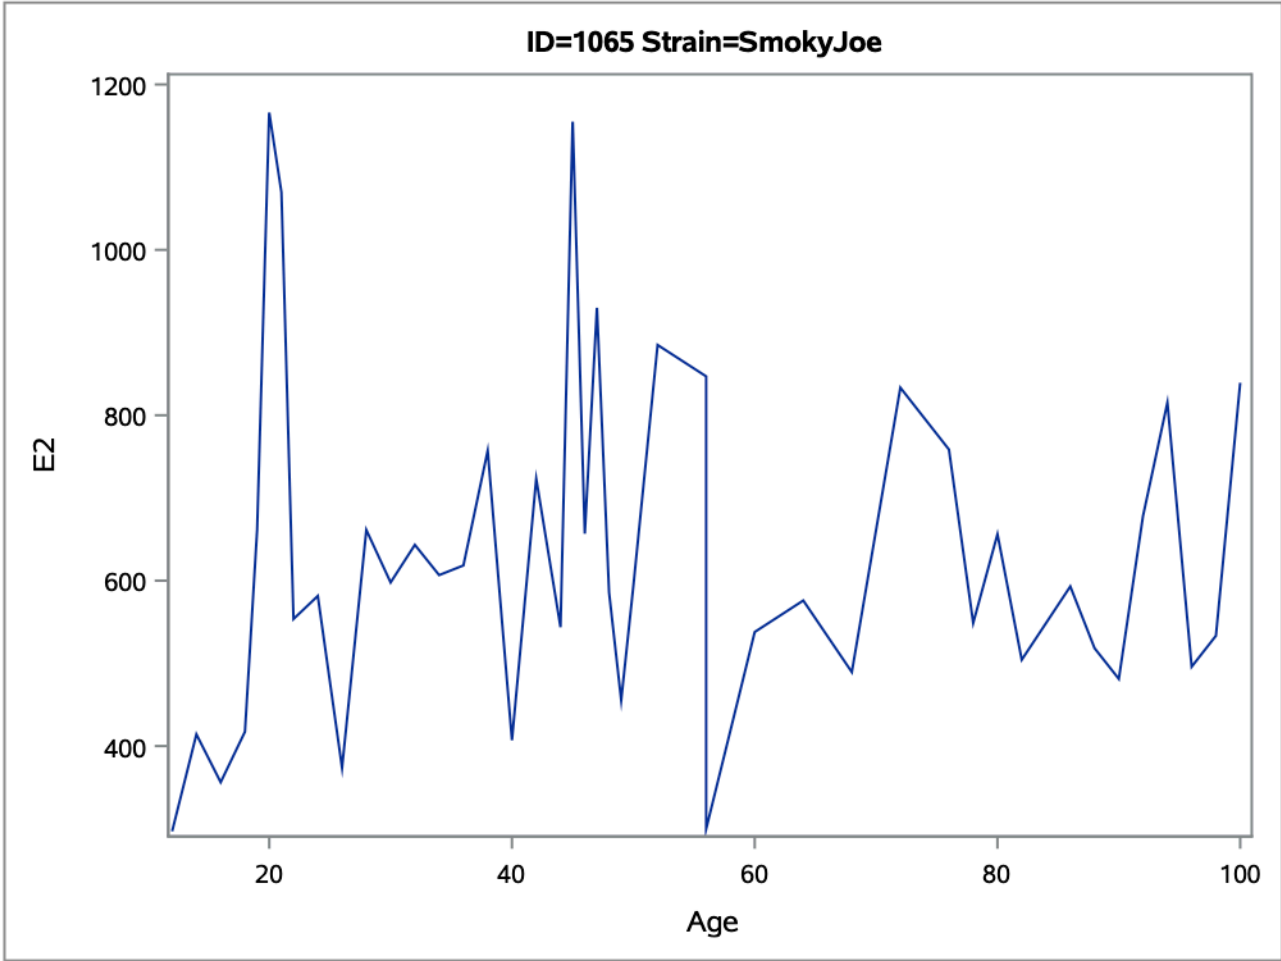

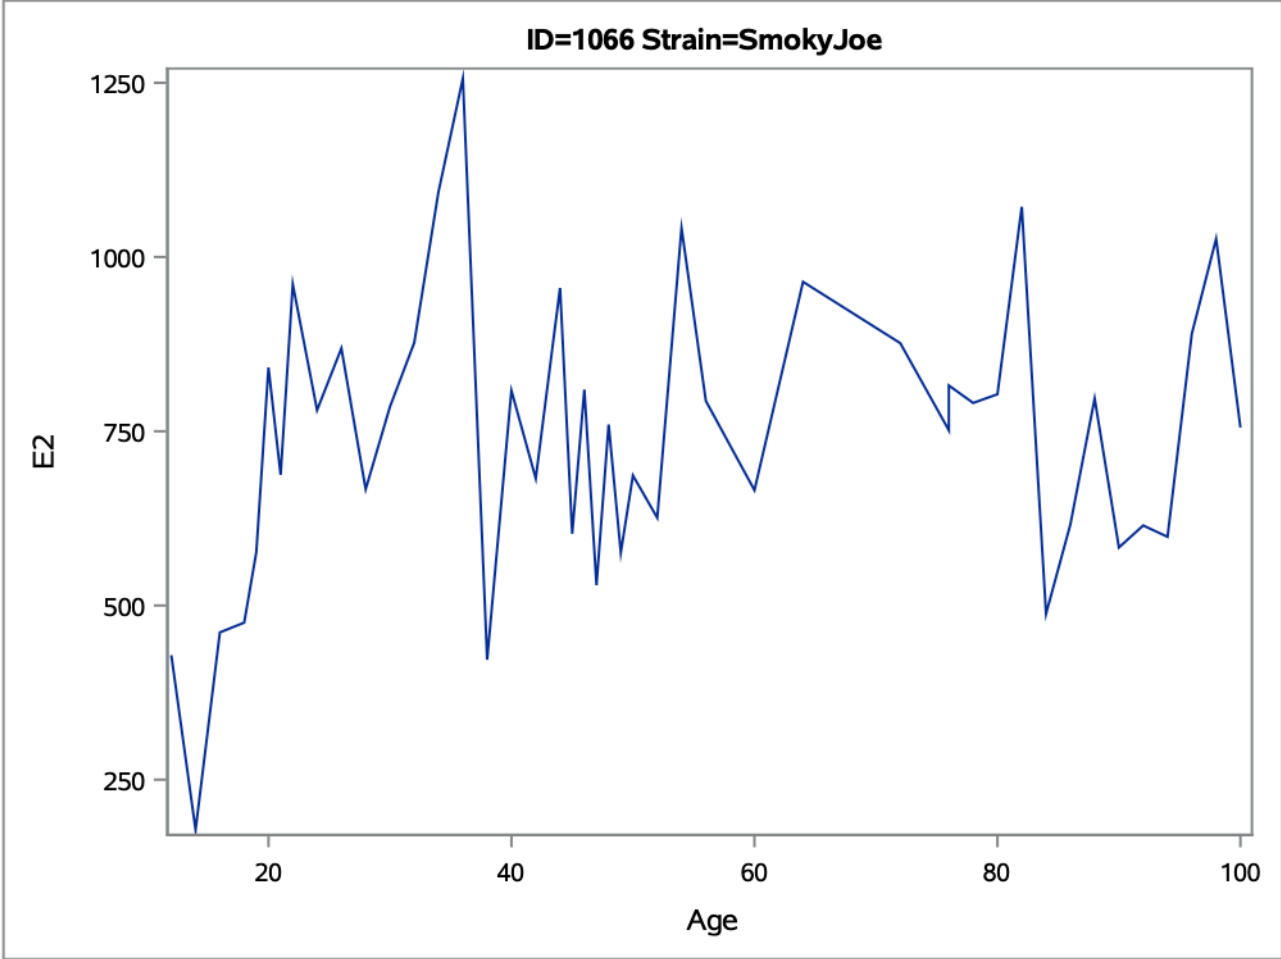



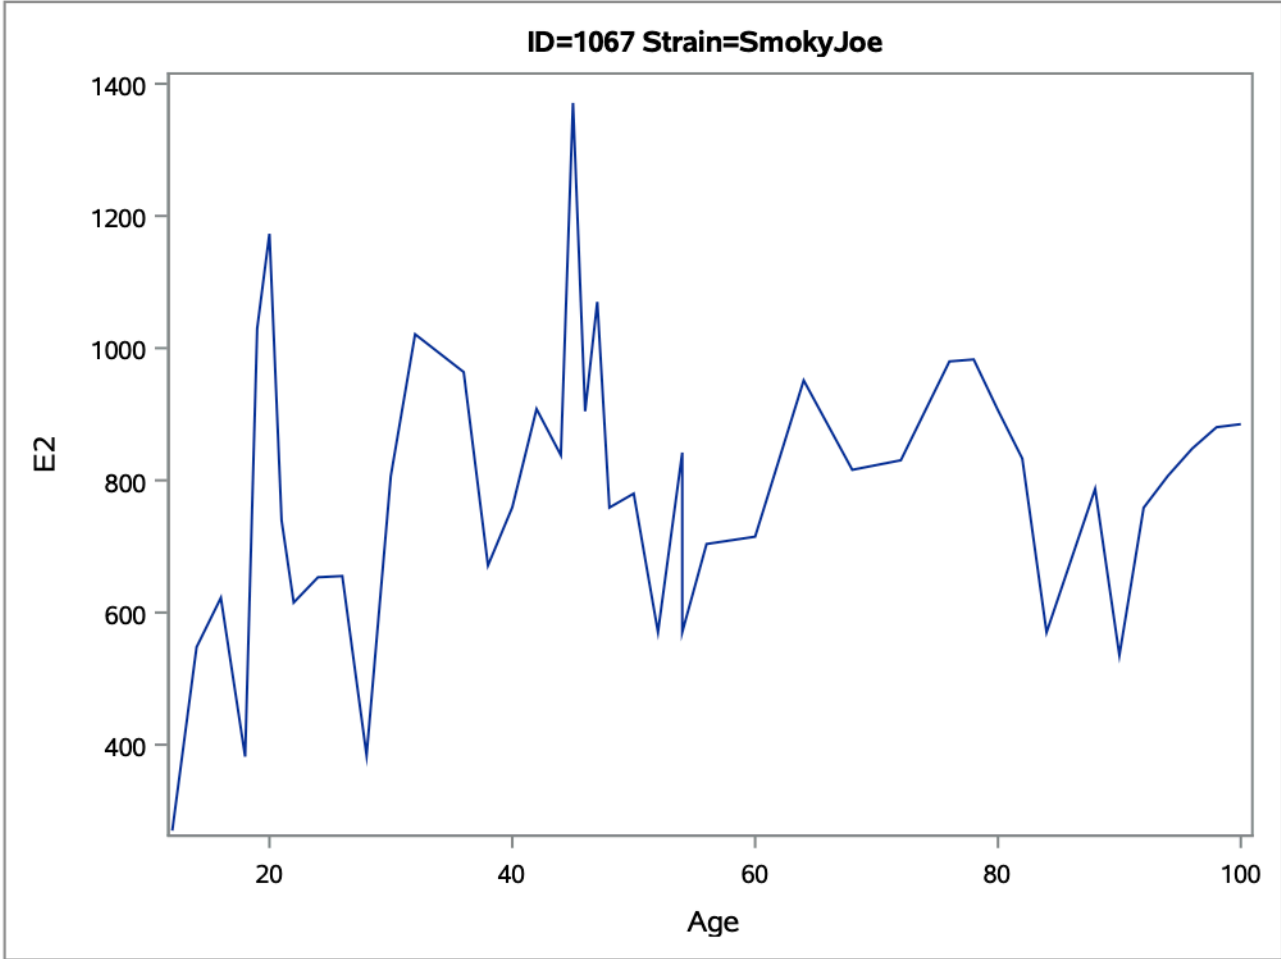

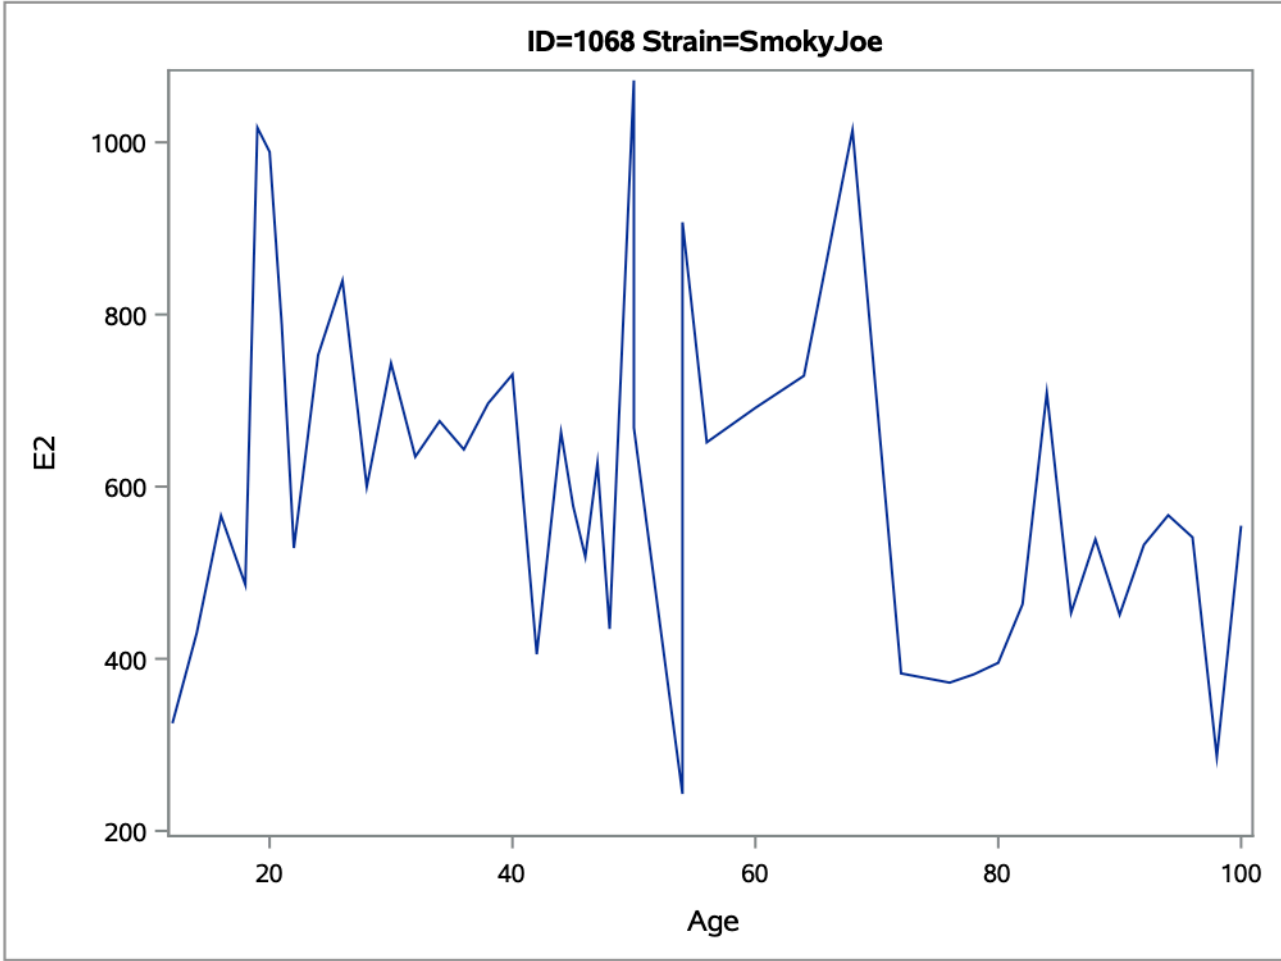

ID=1069 Strain=SmokyJoe

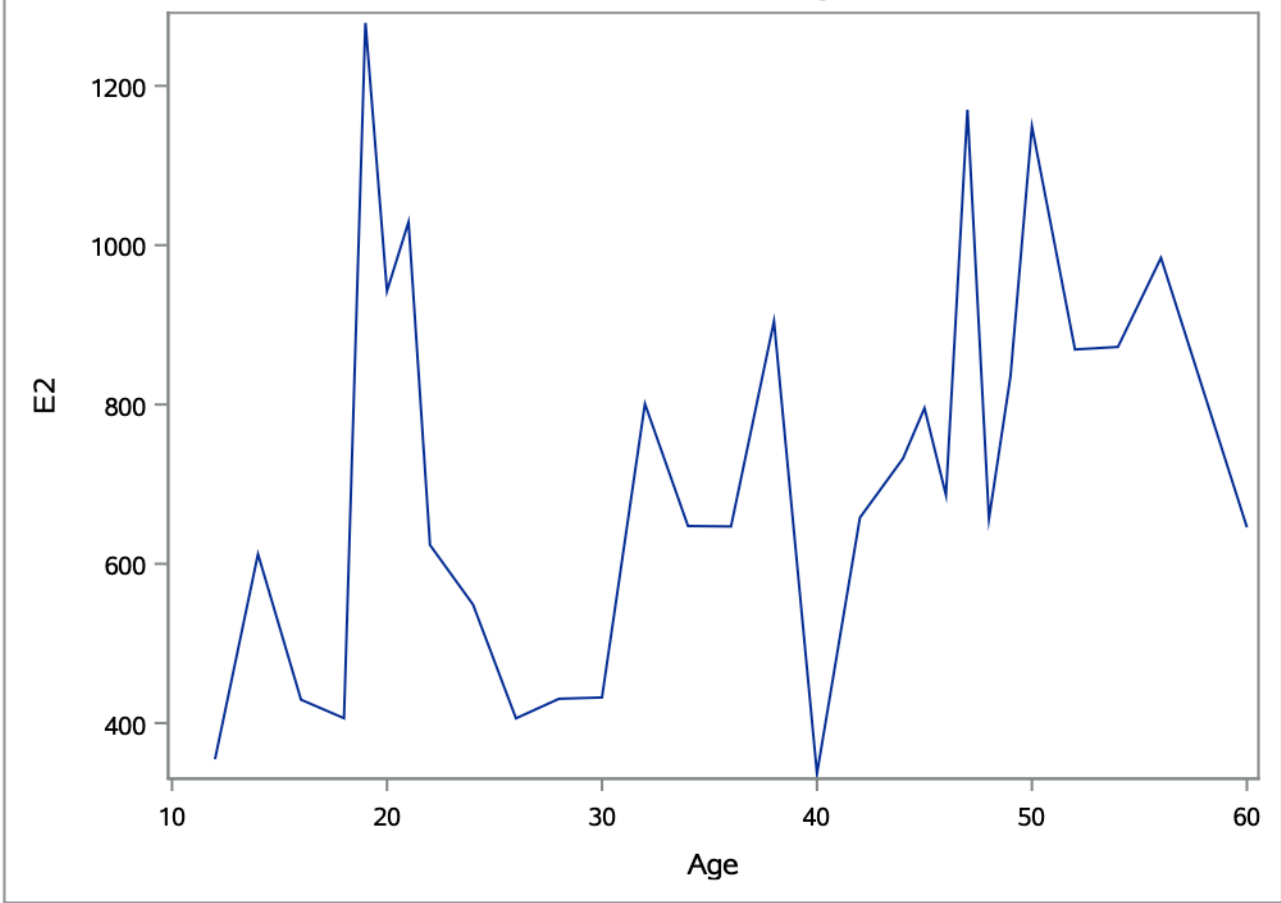

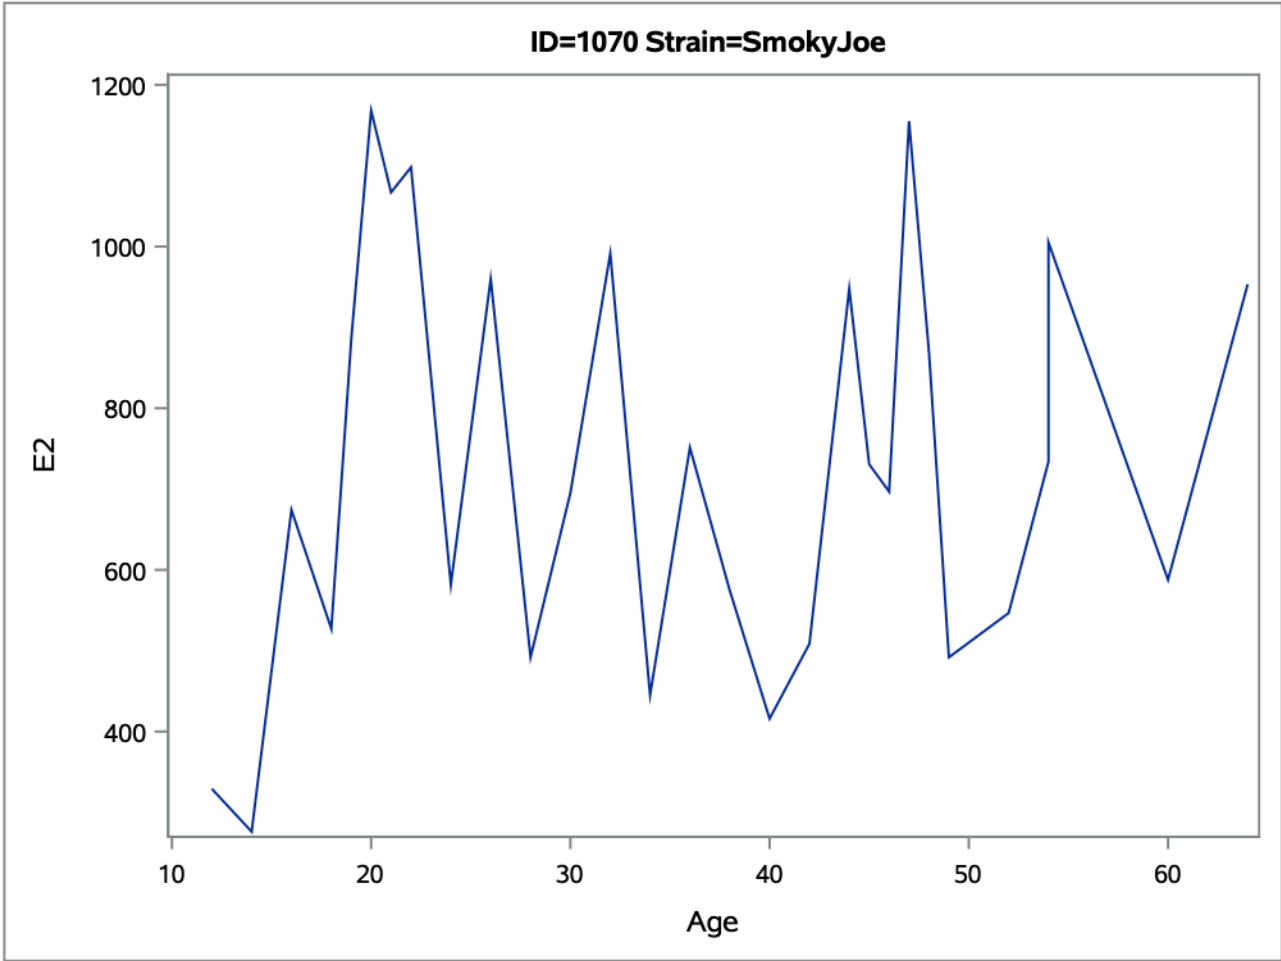

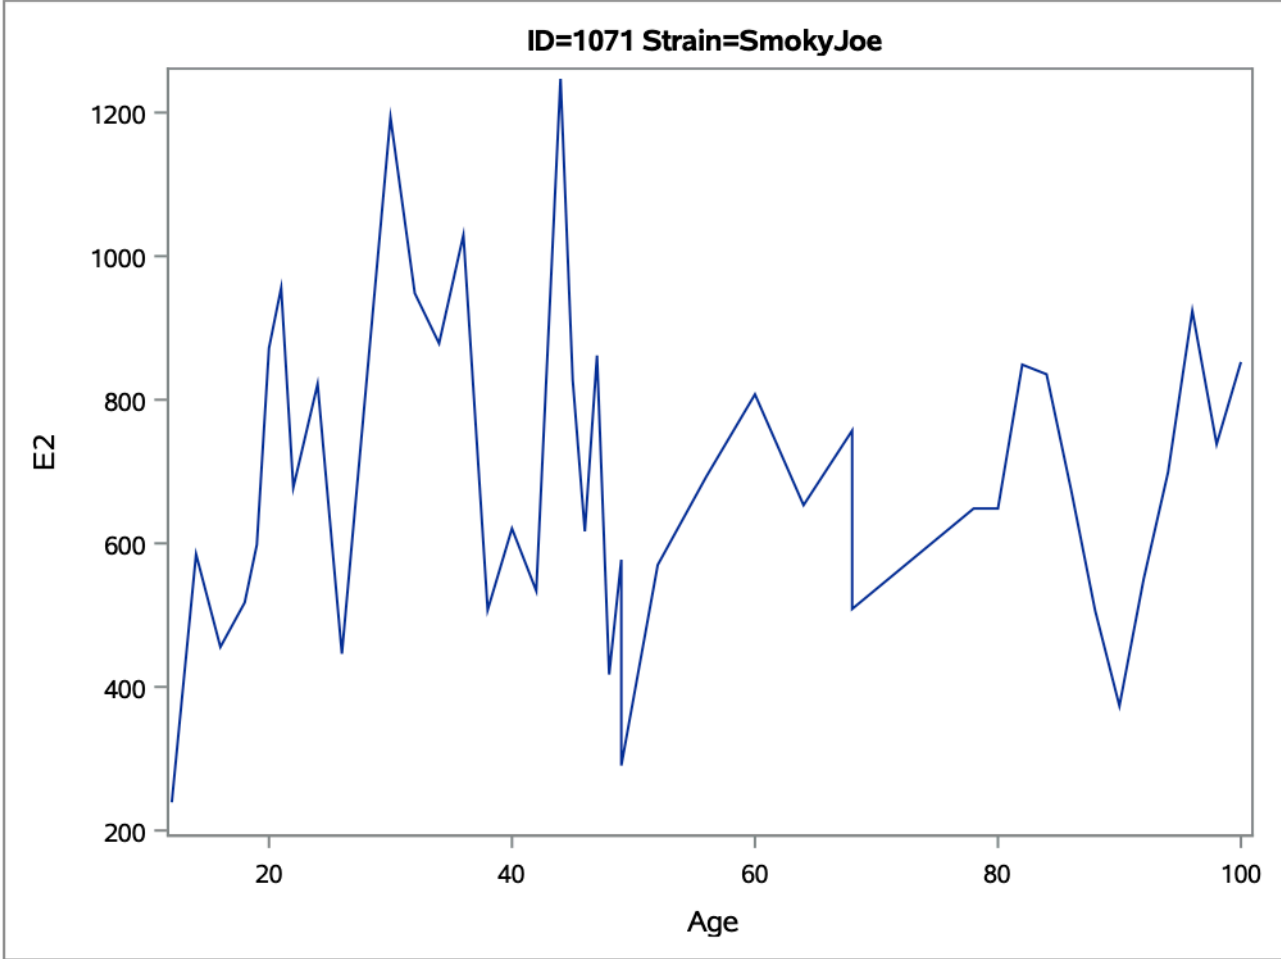

ID=1074 Strain=SmokyJoe

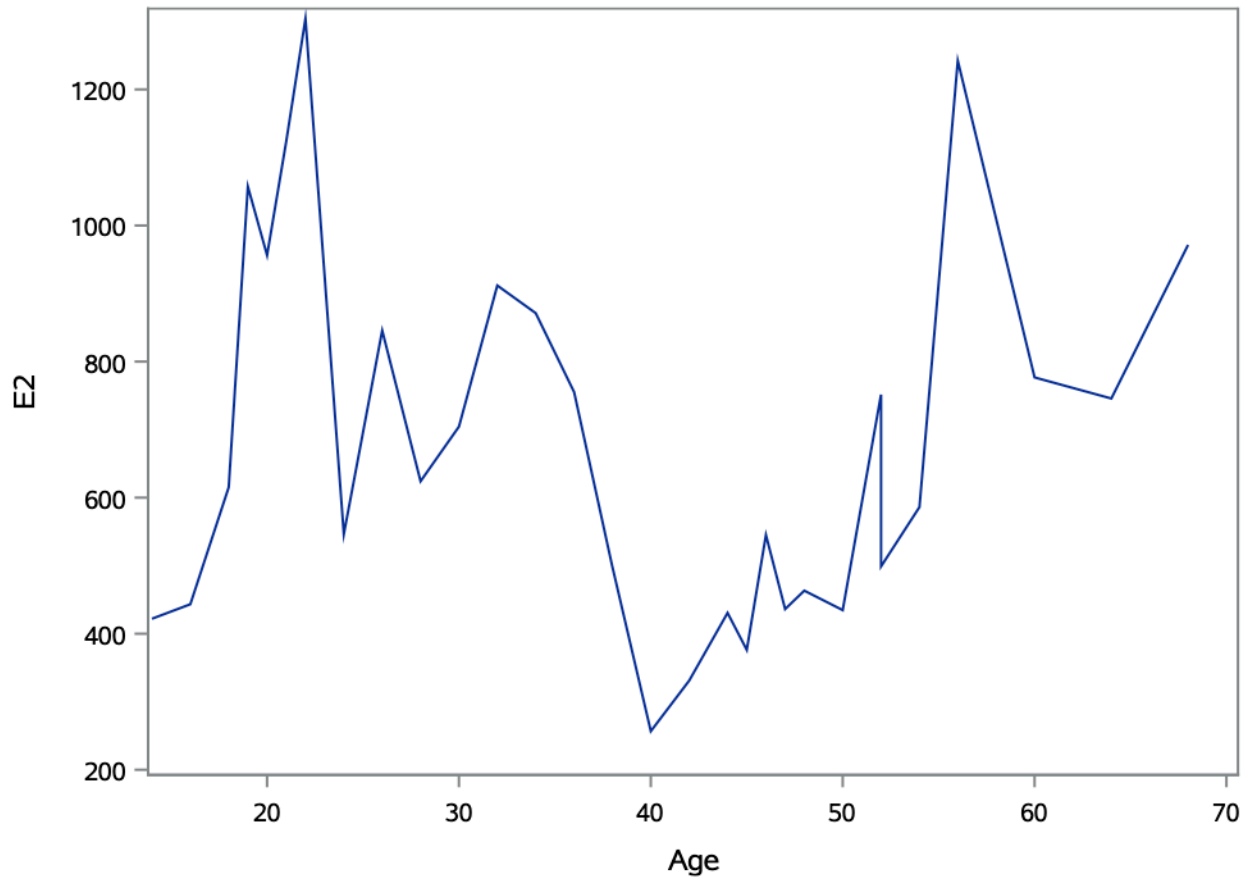

ID=1075 Strain=SmokyJoe

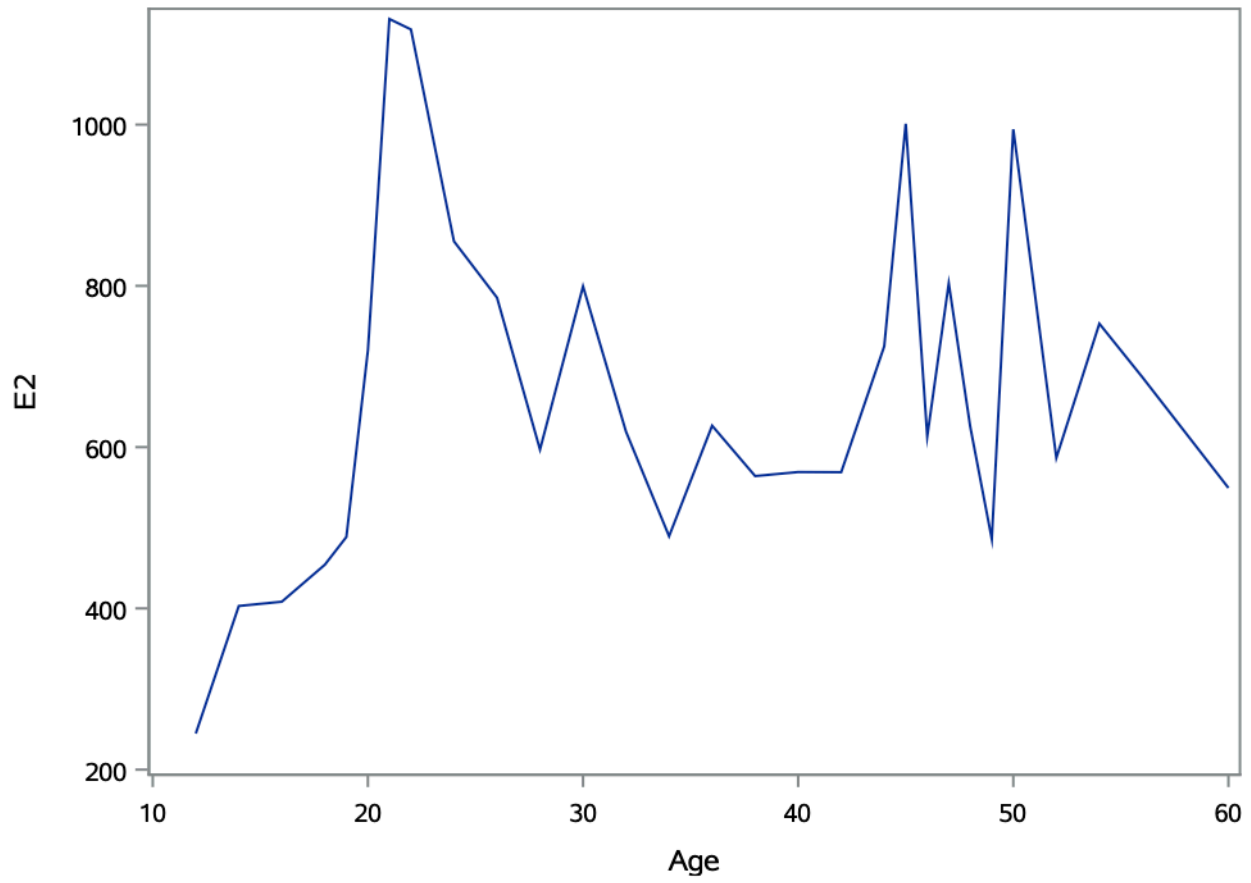

ID=1077 Strain=SmokyJoe

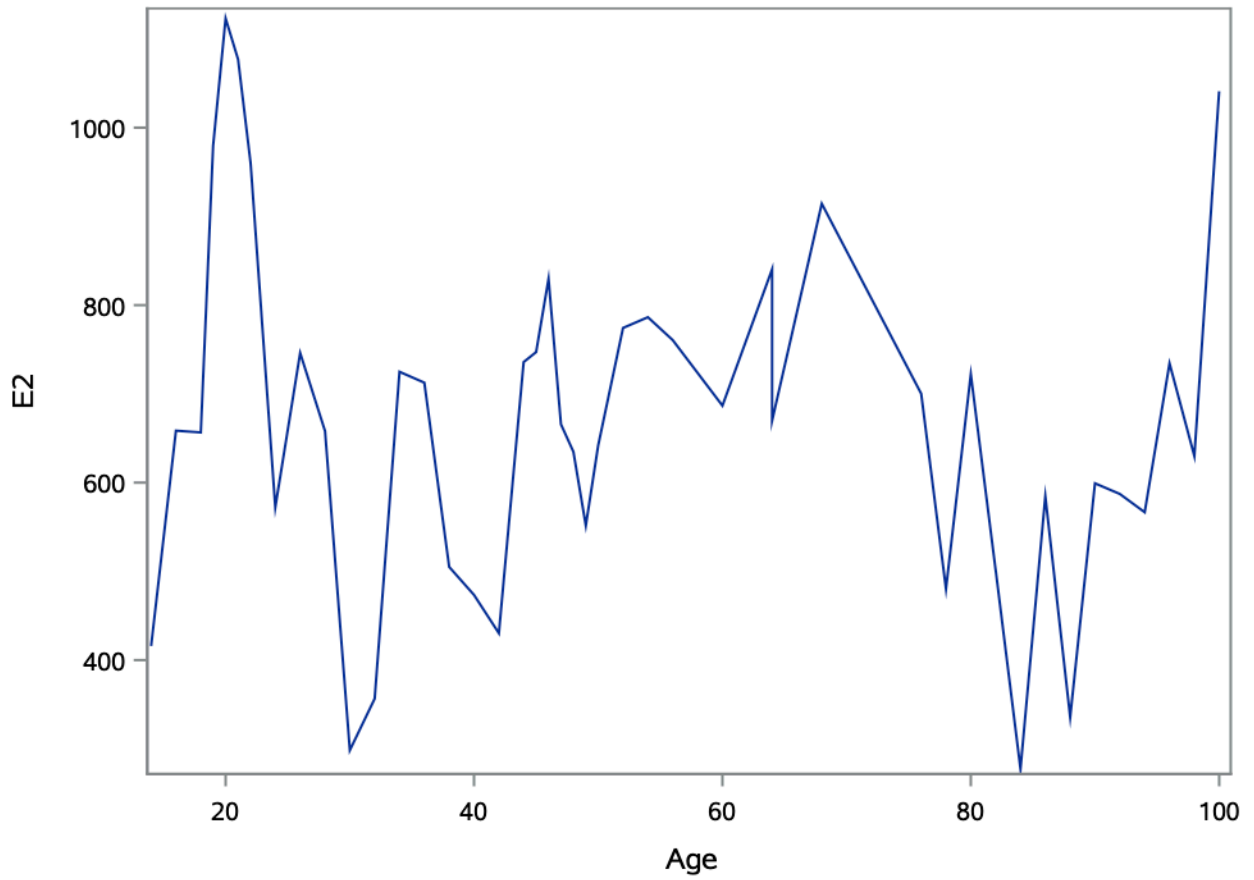



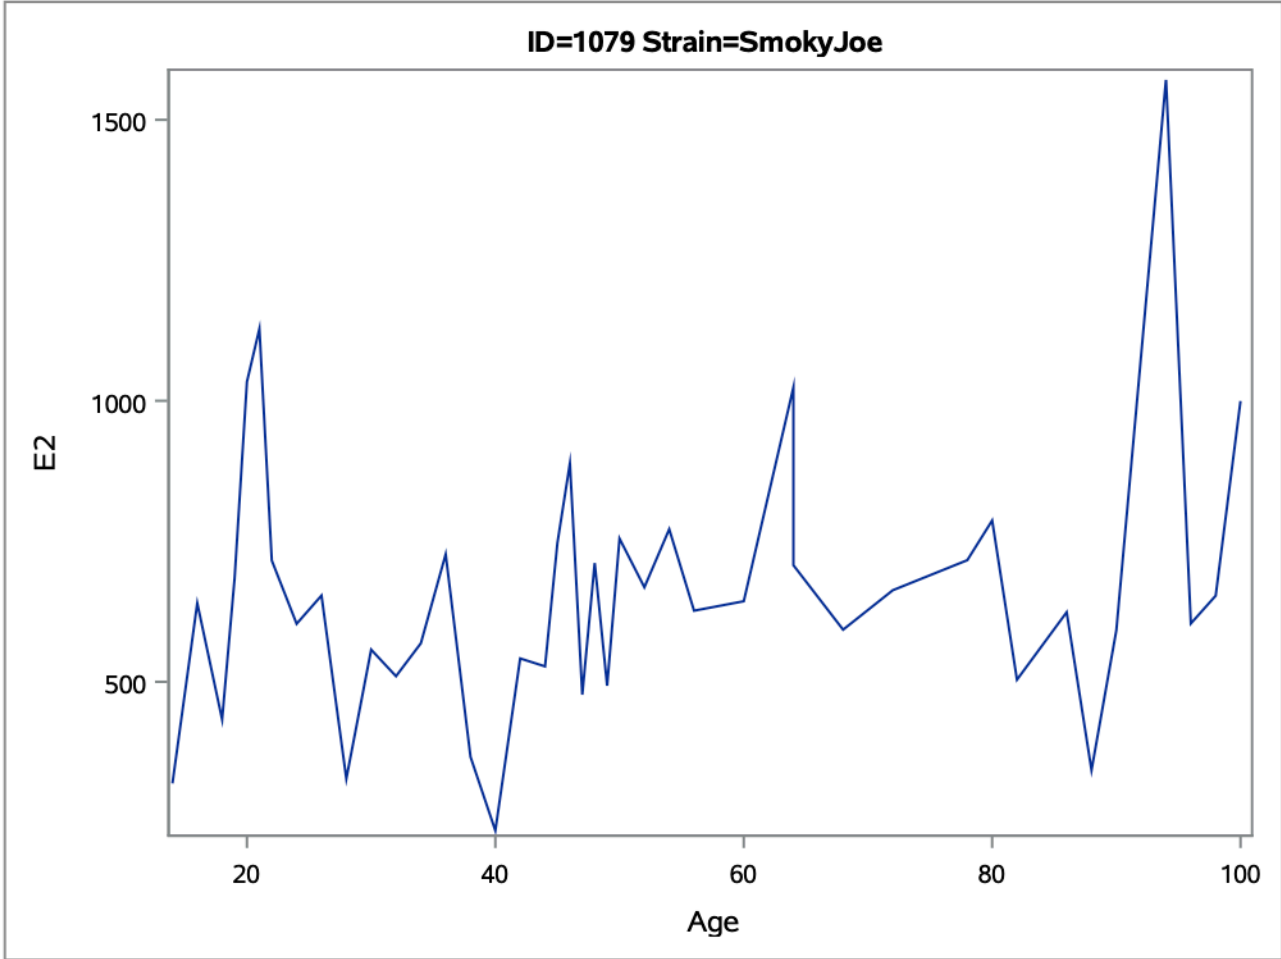

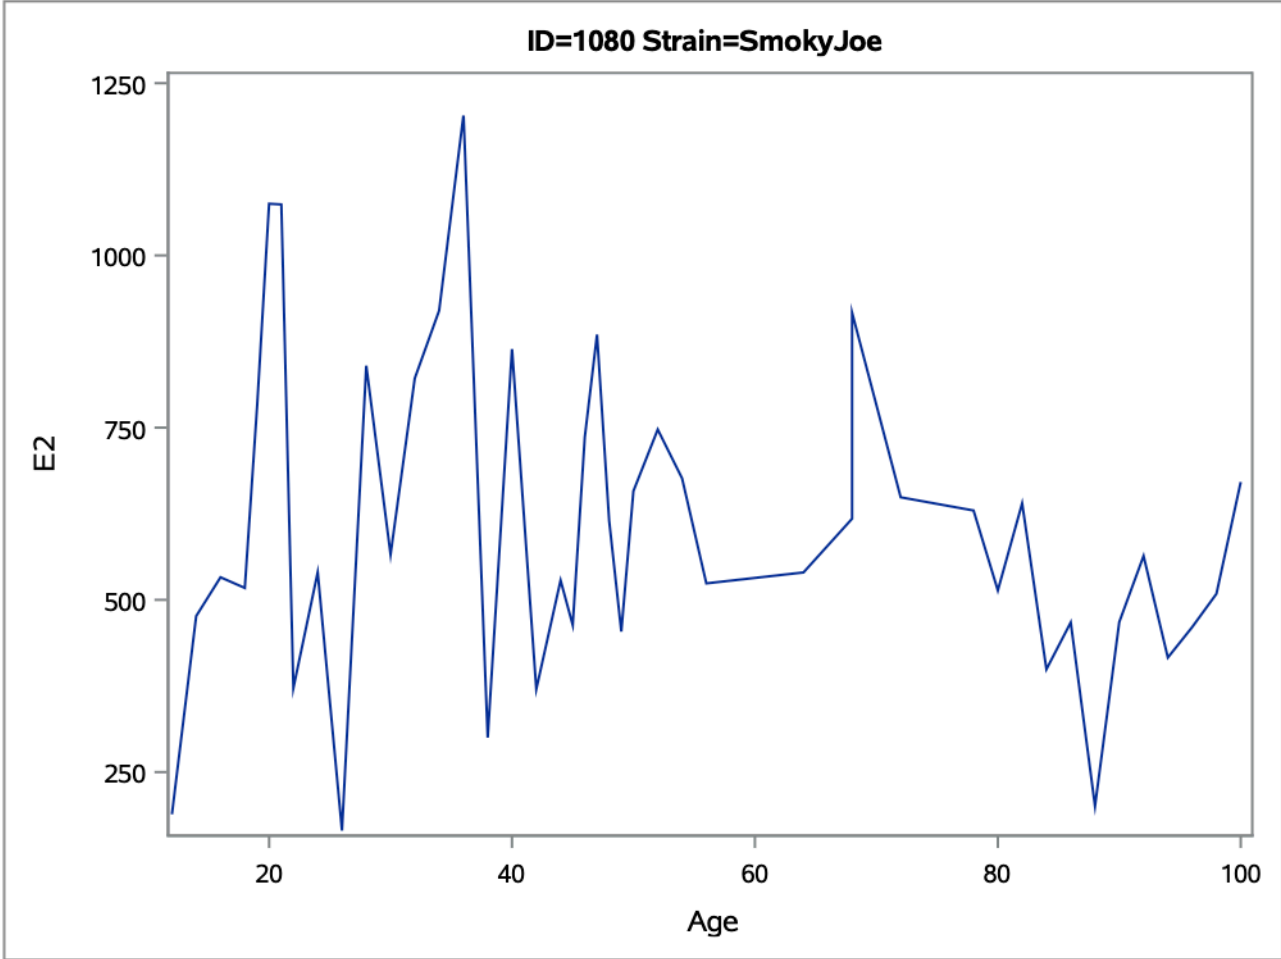

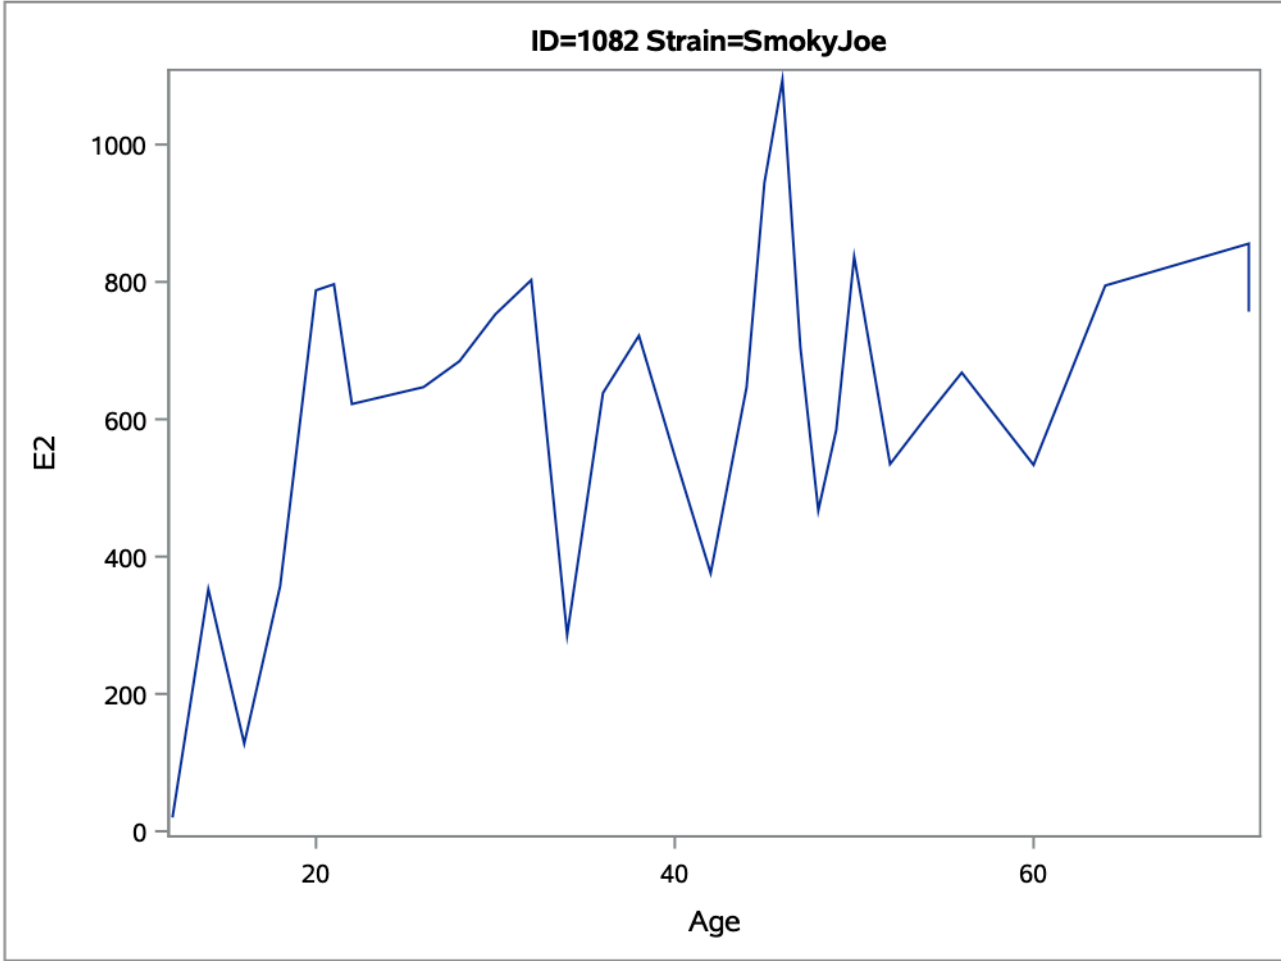

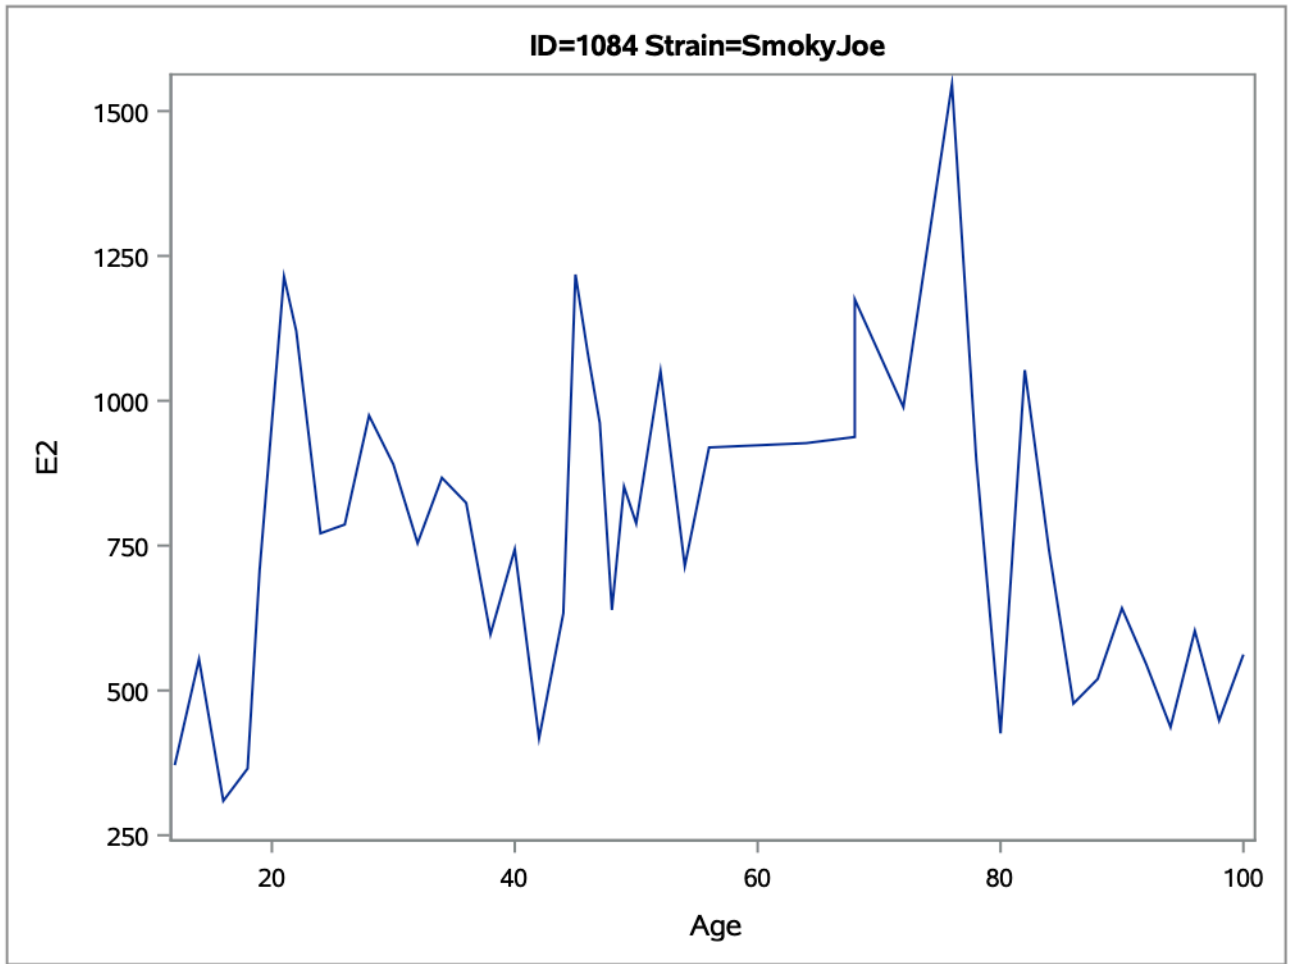

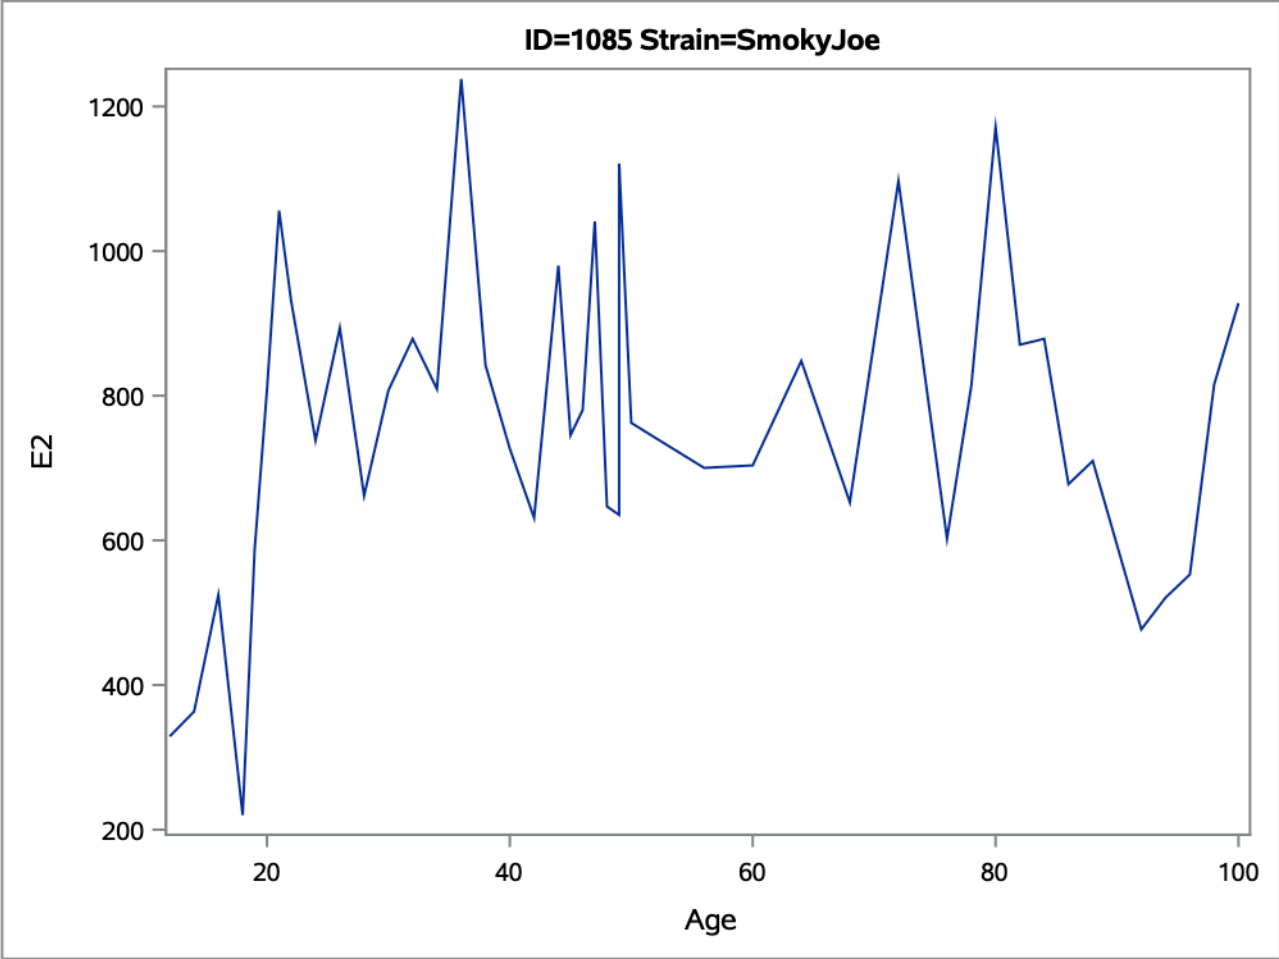

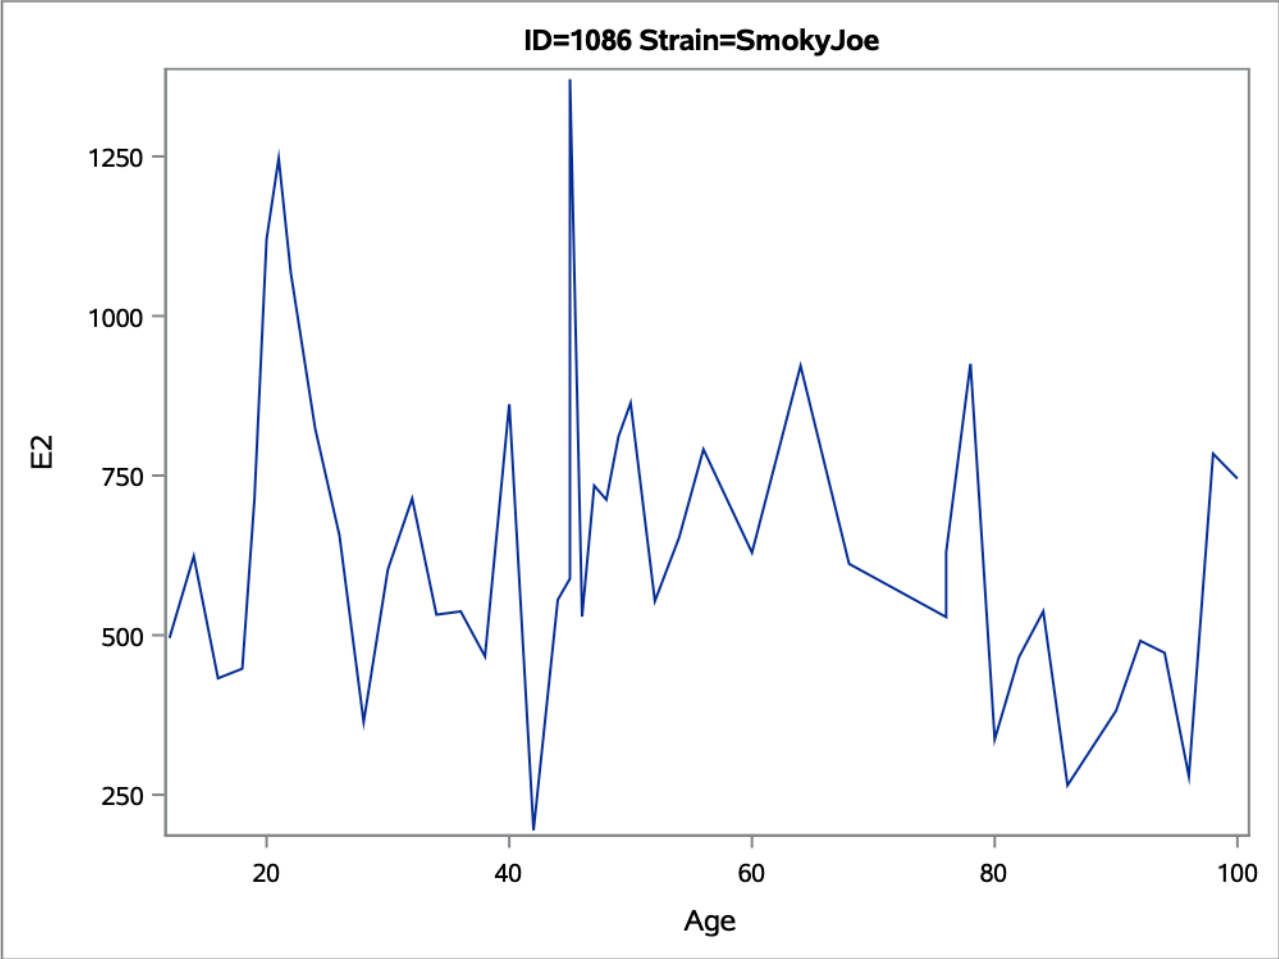

ID=1087 Strain=SmokyJoe

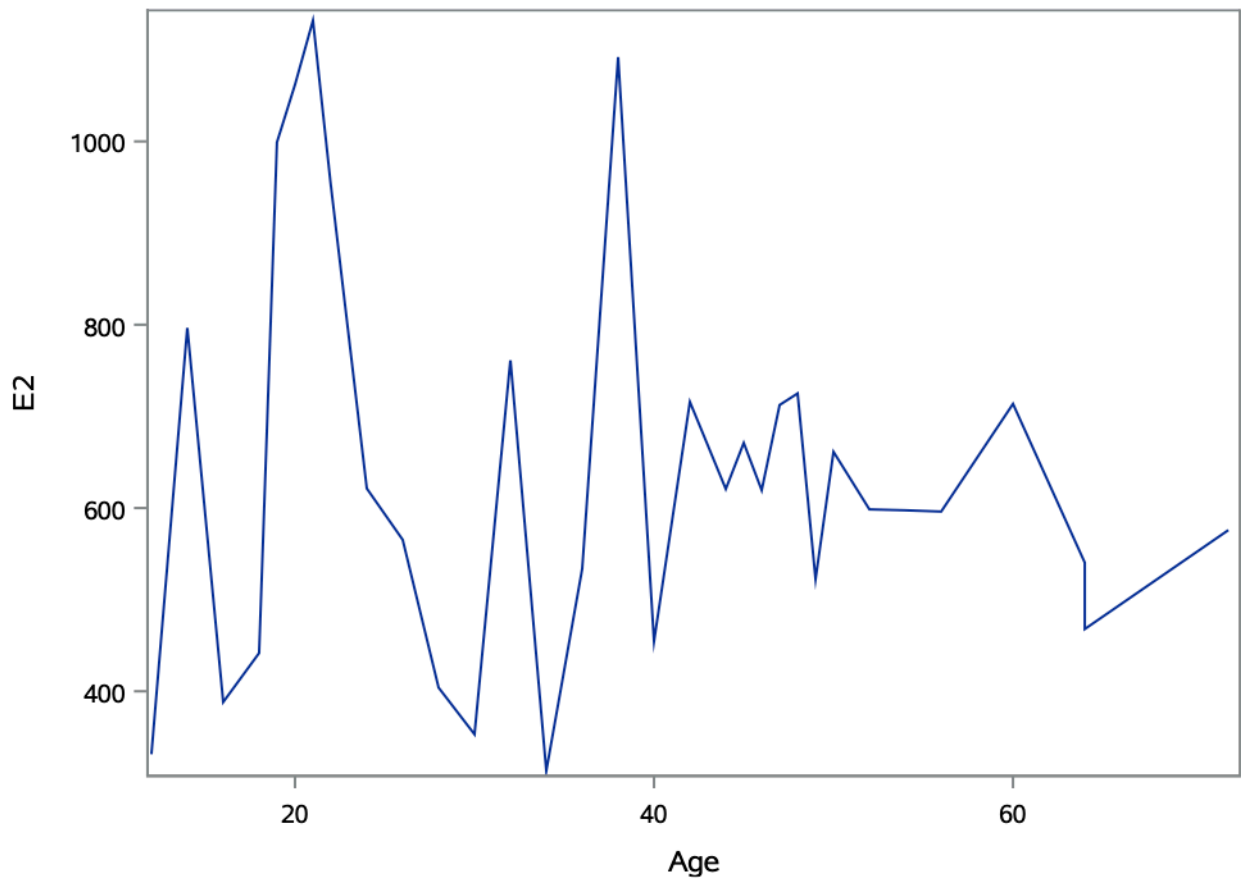

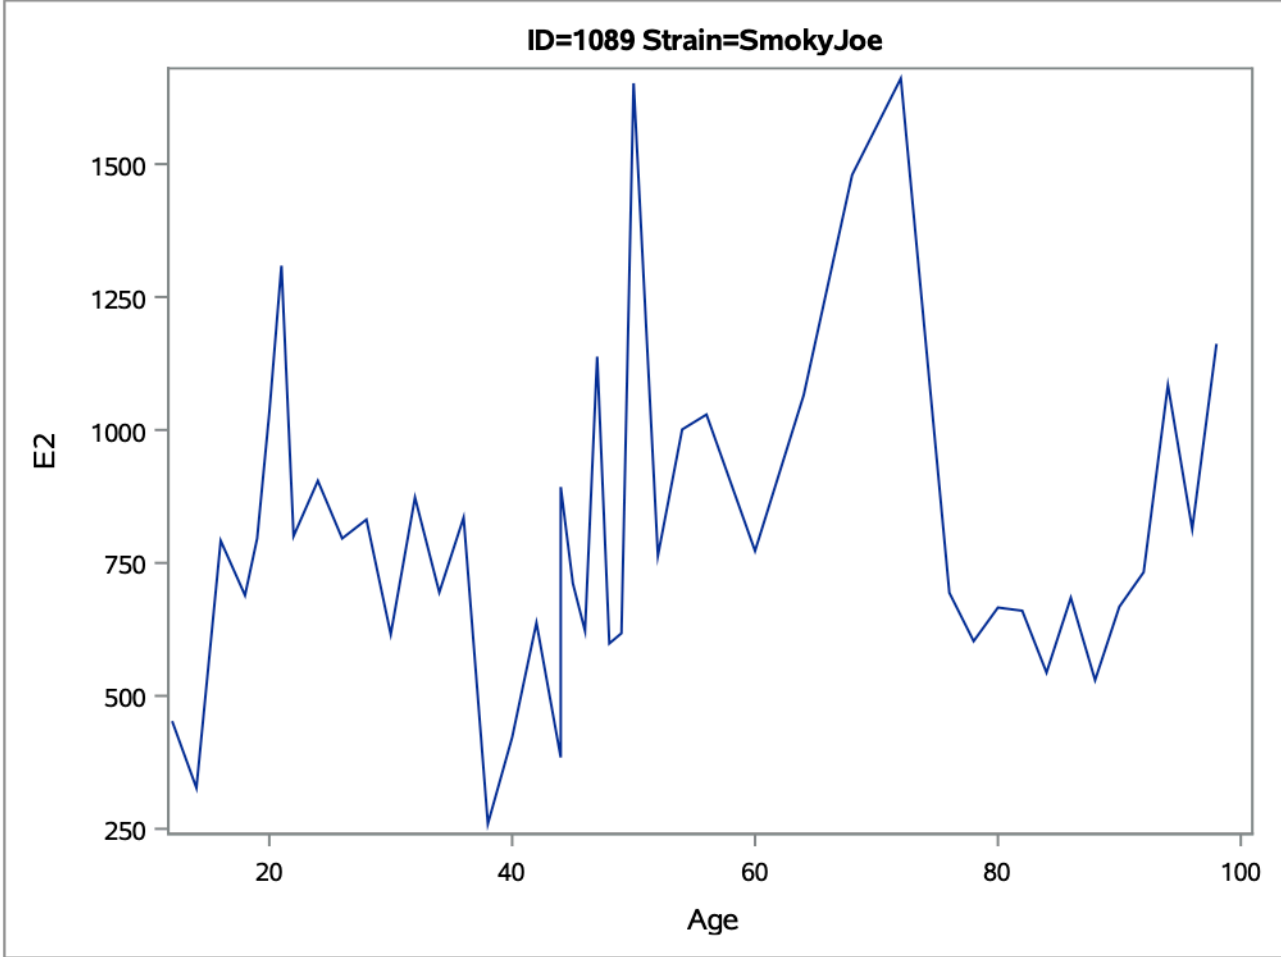



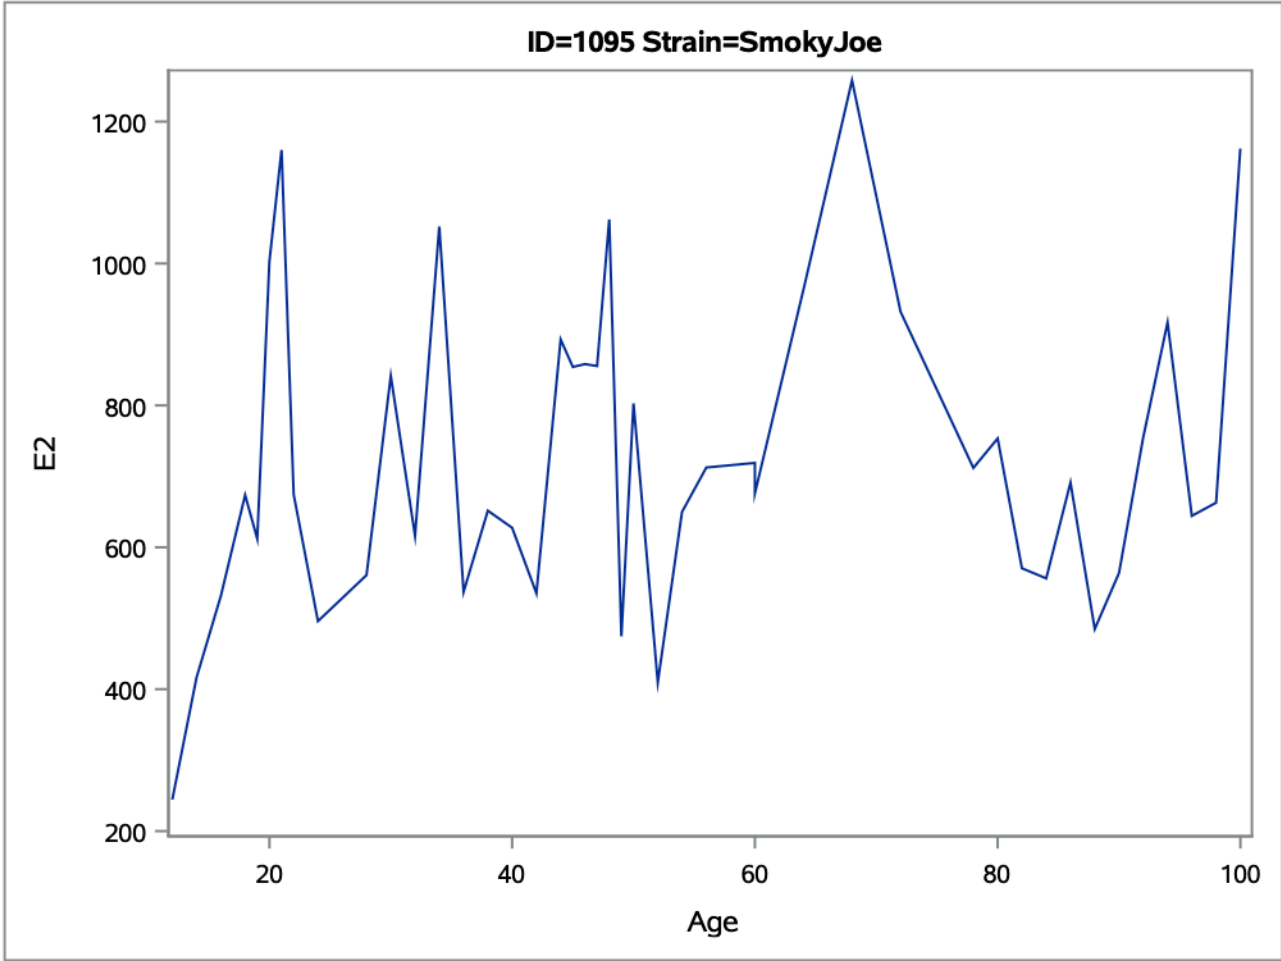

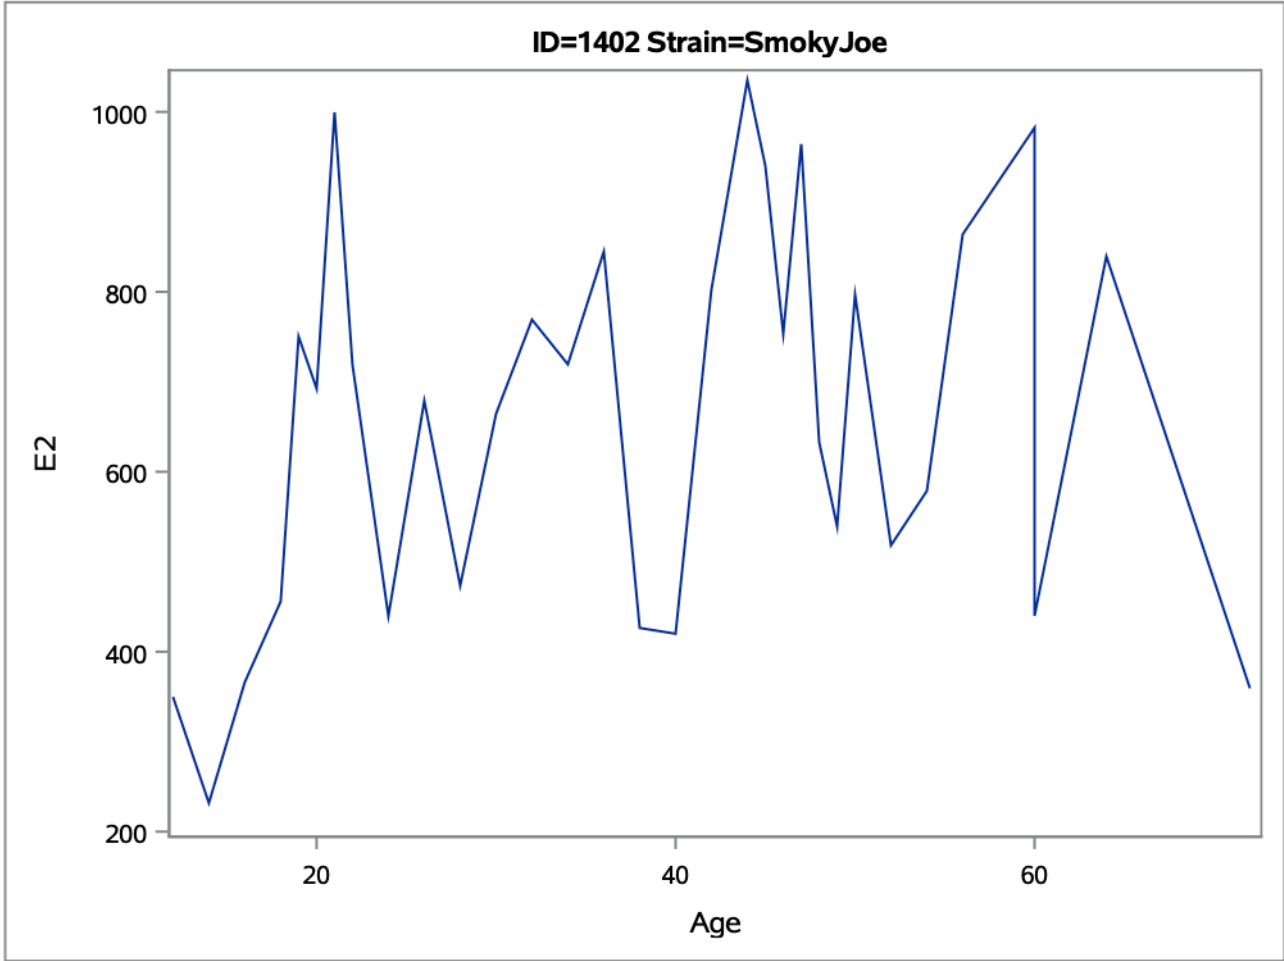

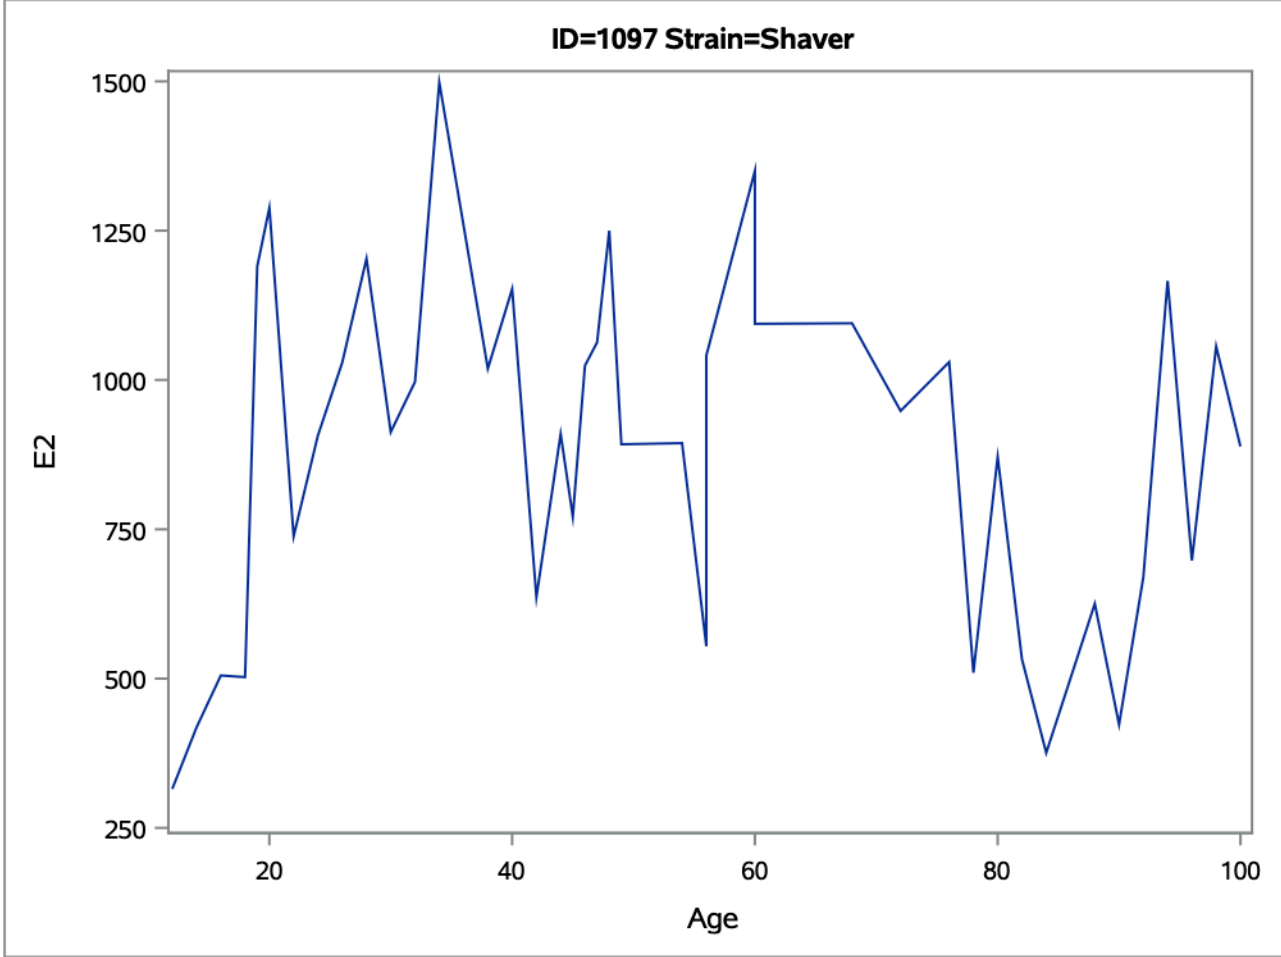

ID=1099 Strain=Shaver

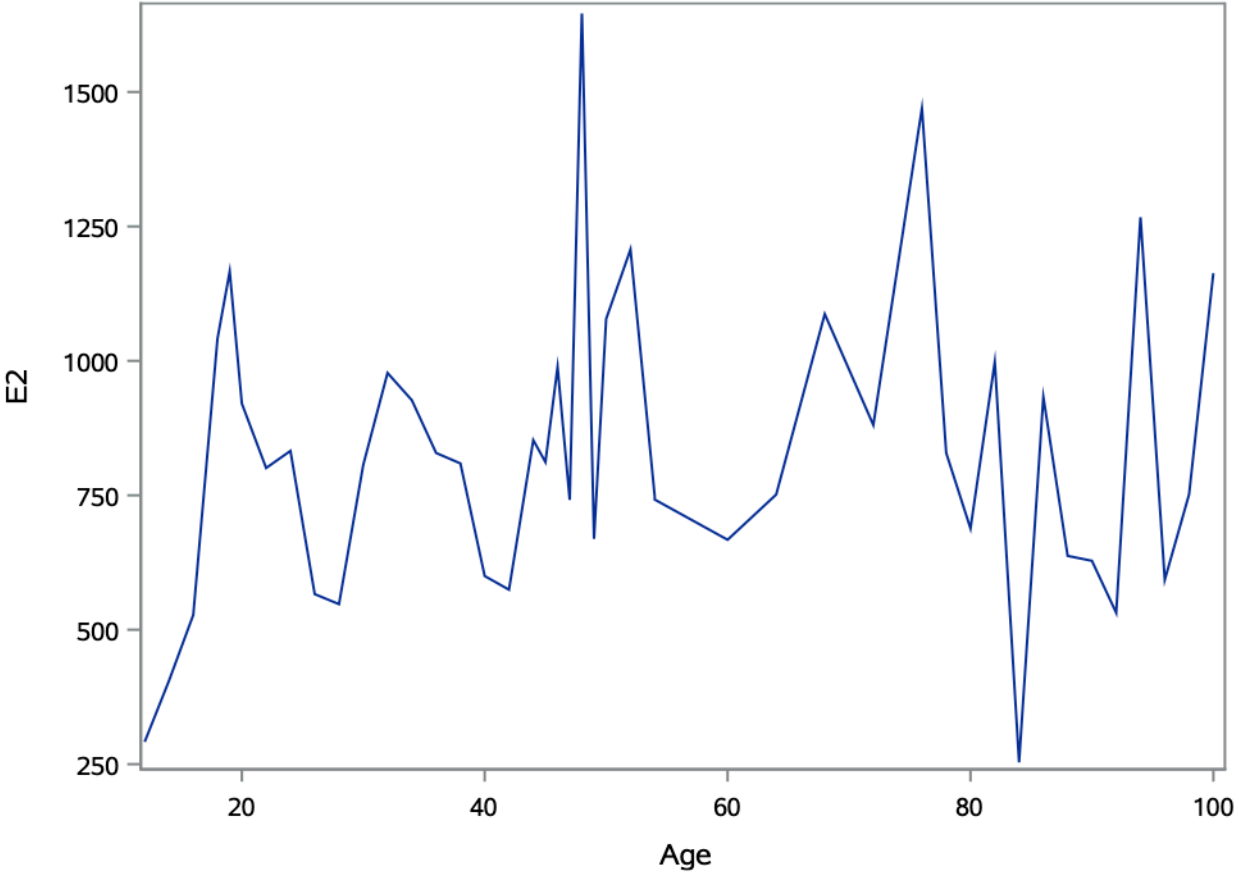

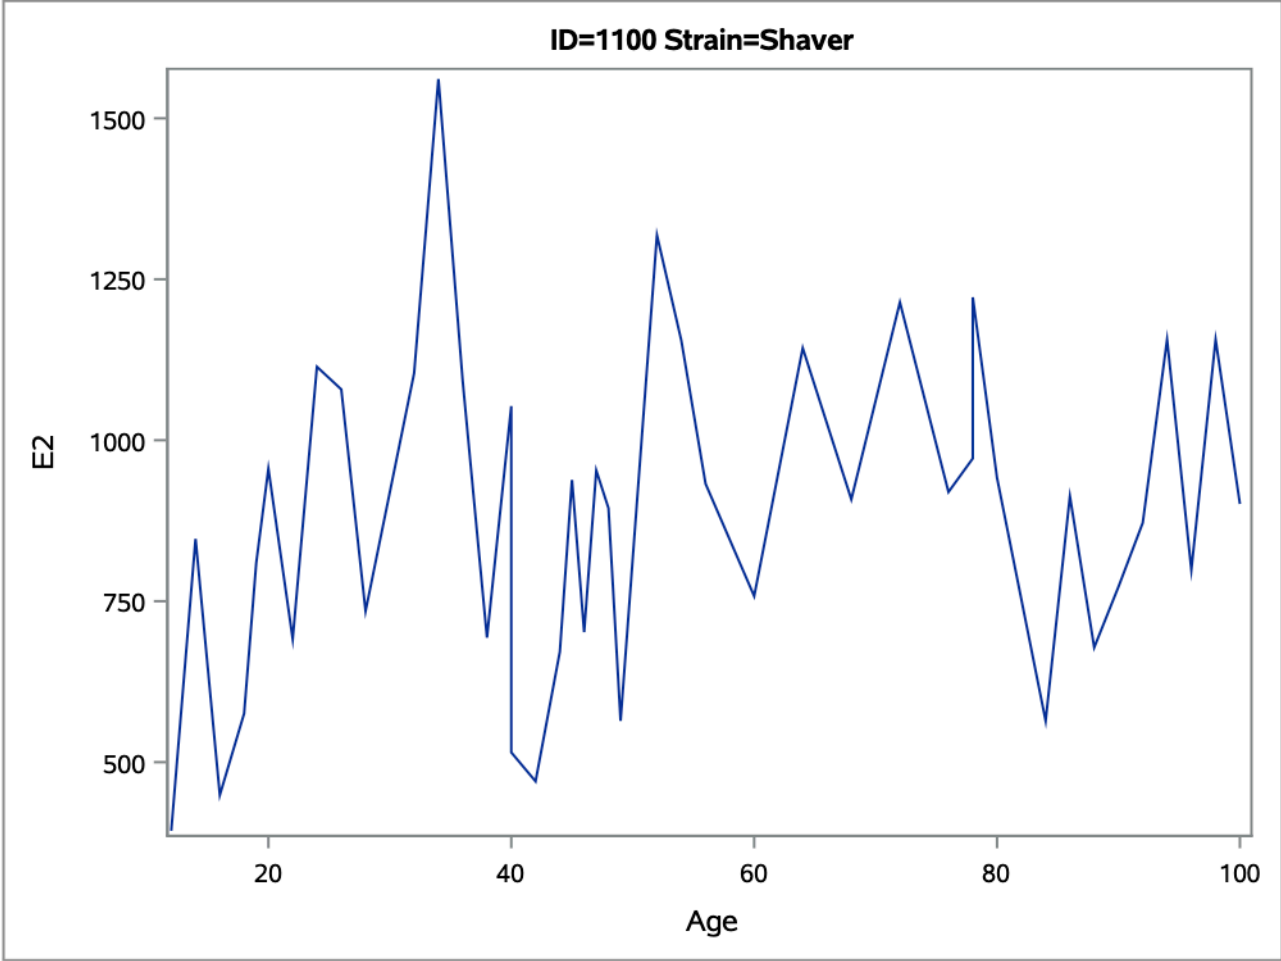

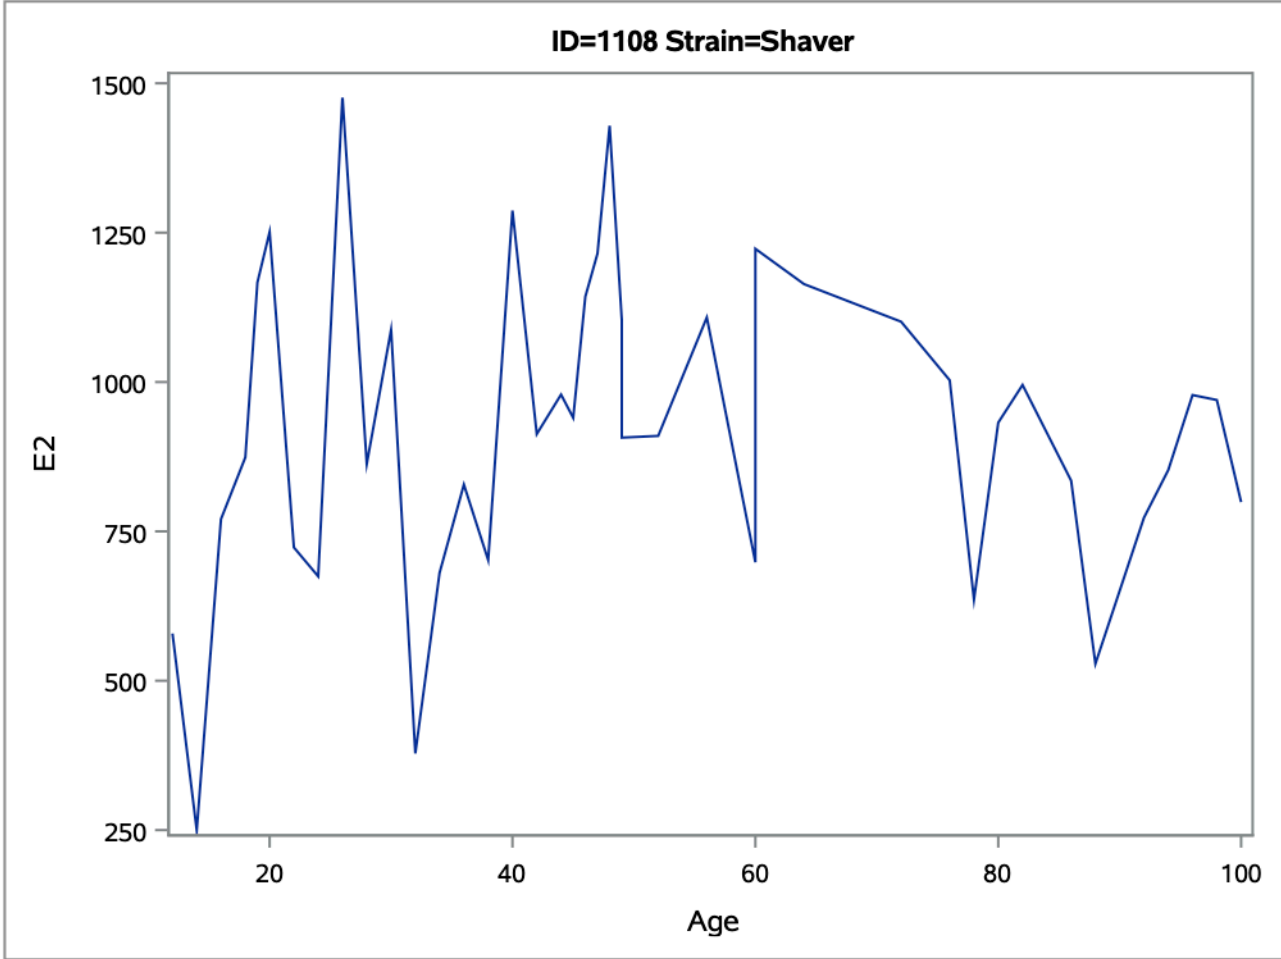

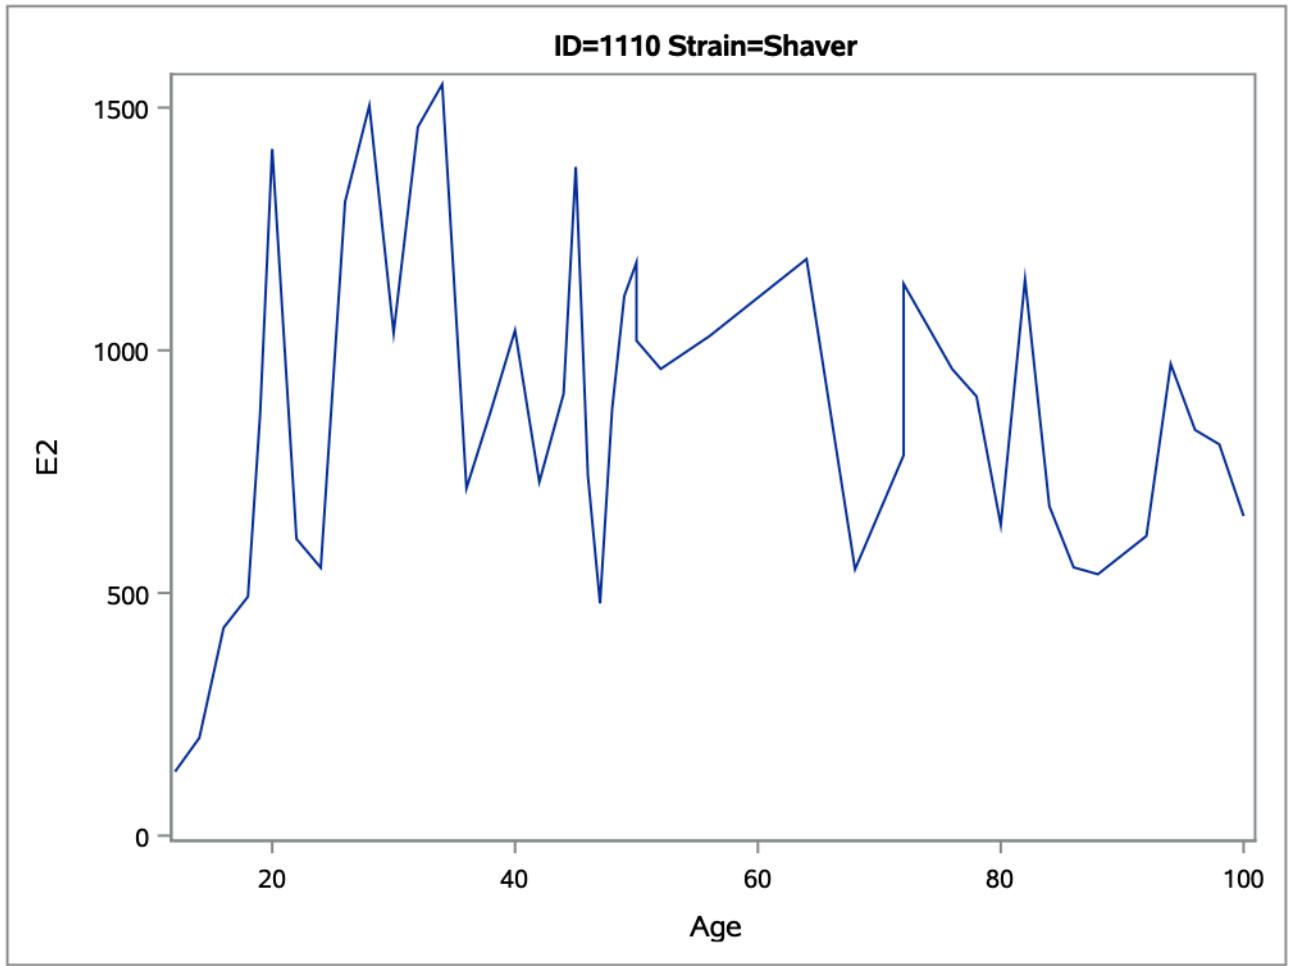

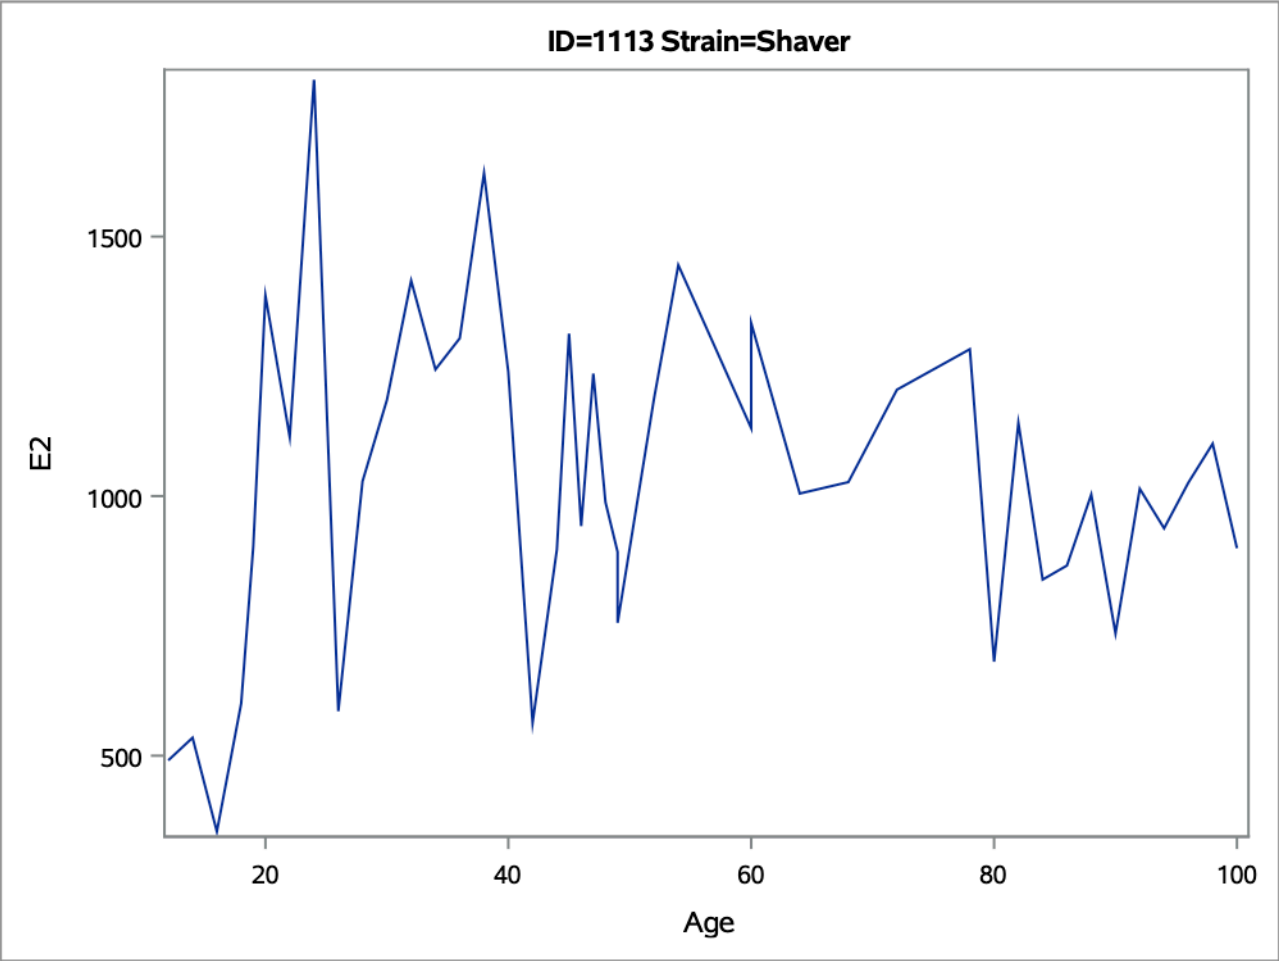



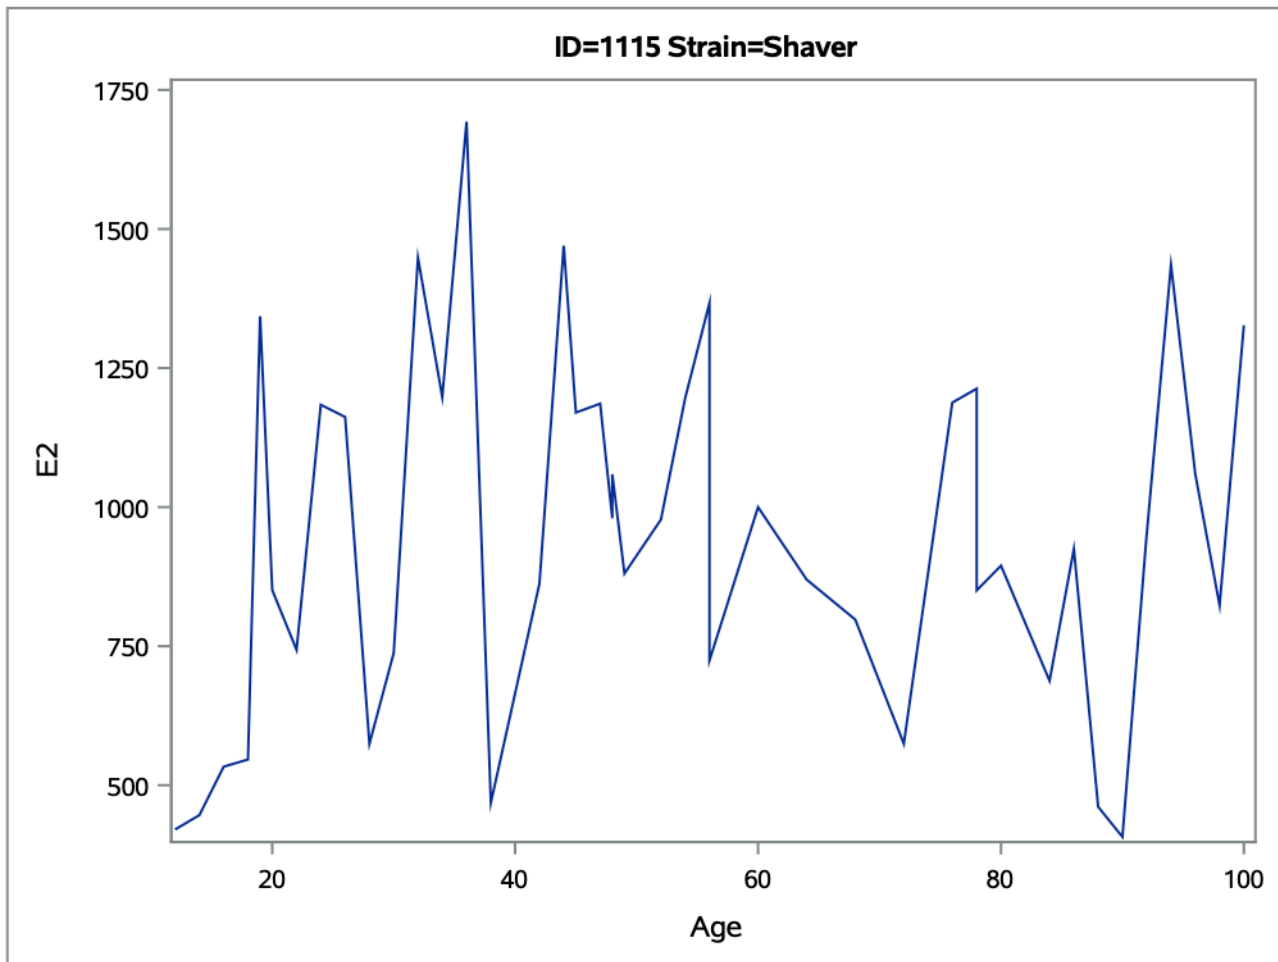

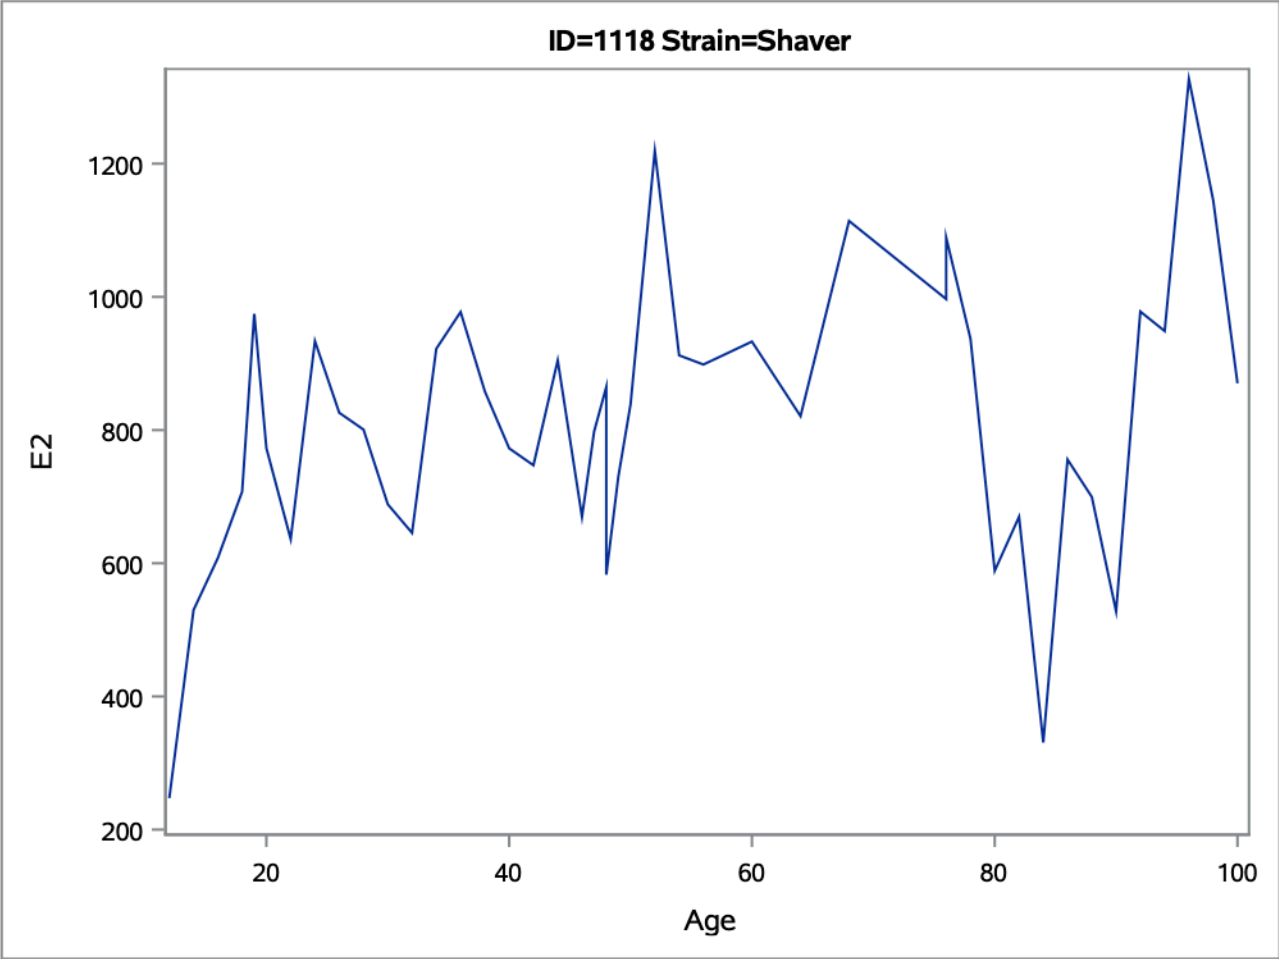

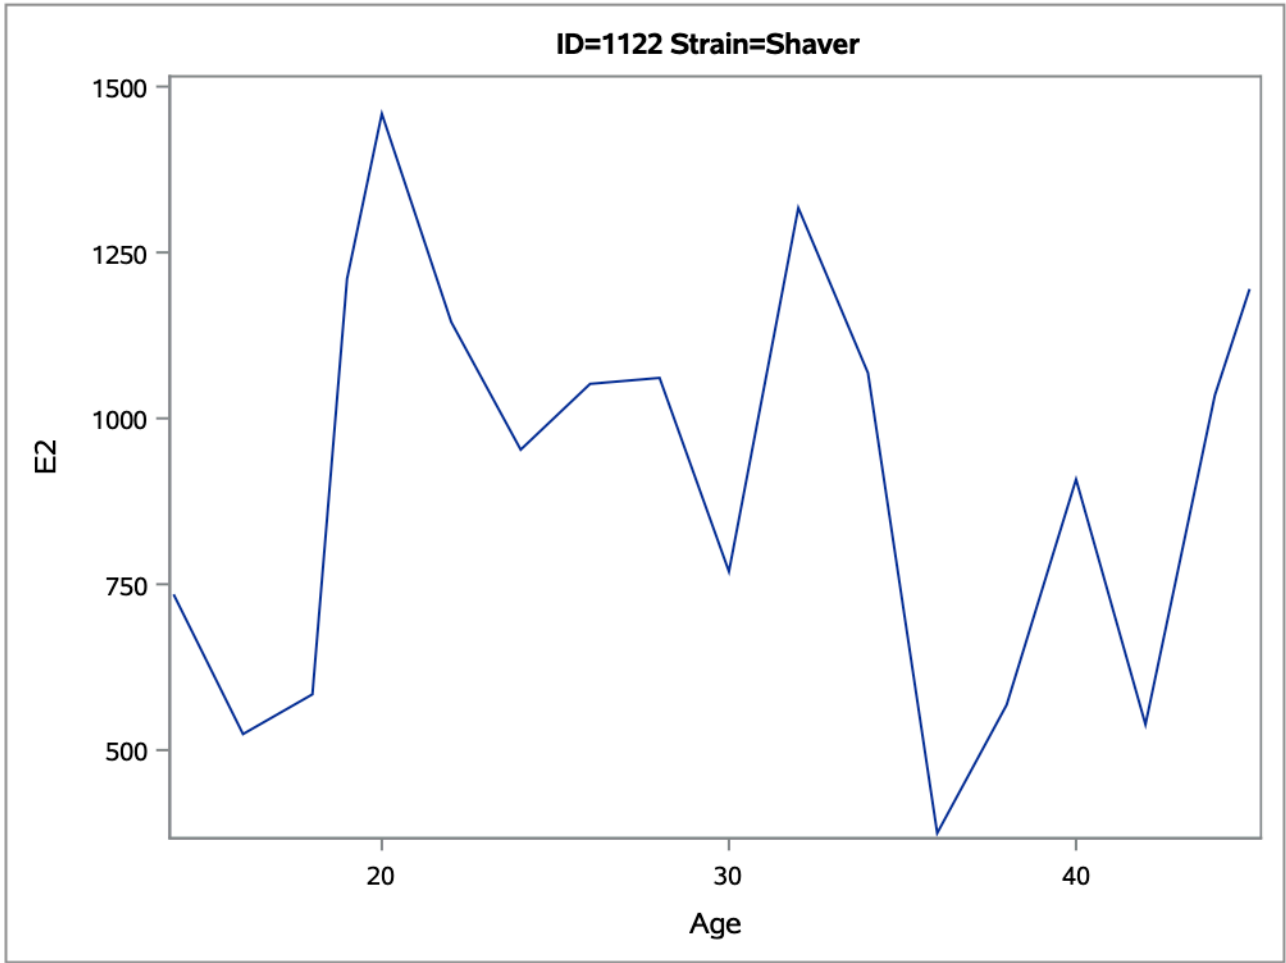

ID=1123 Strain=Shaver

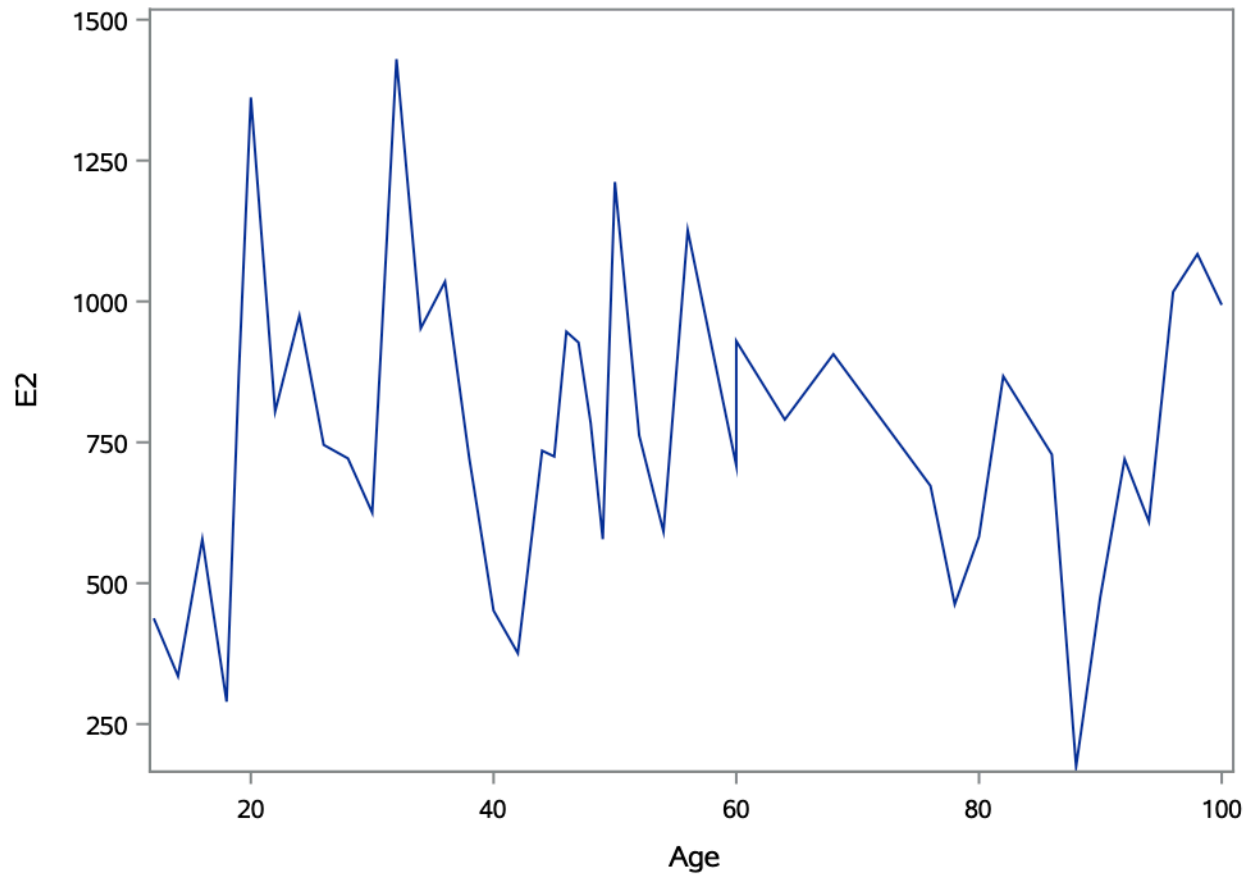

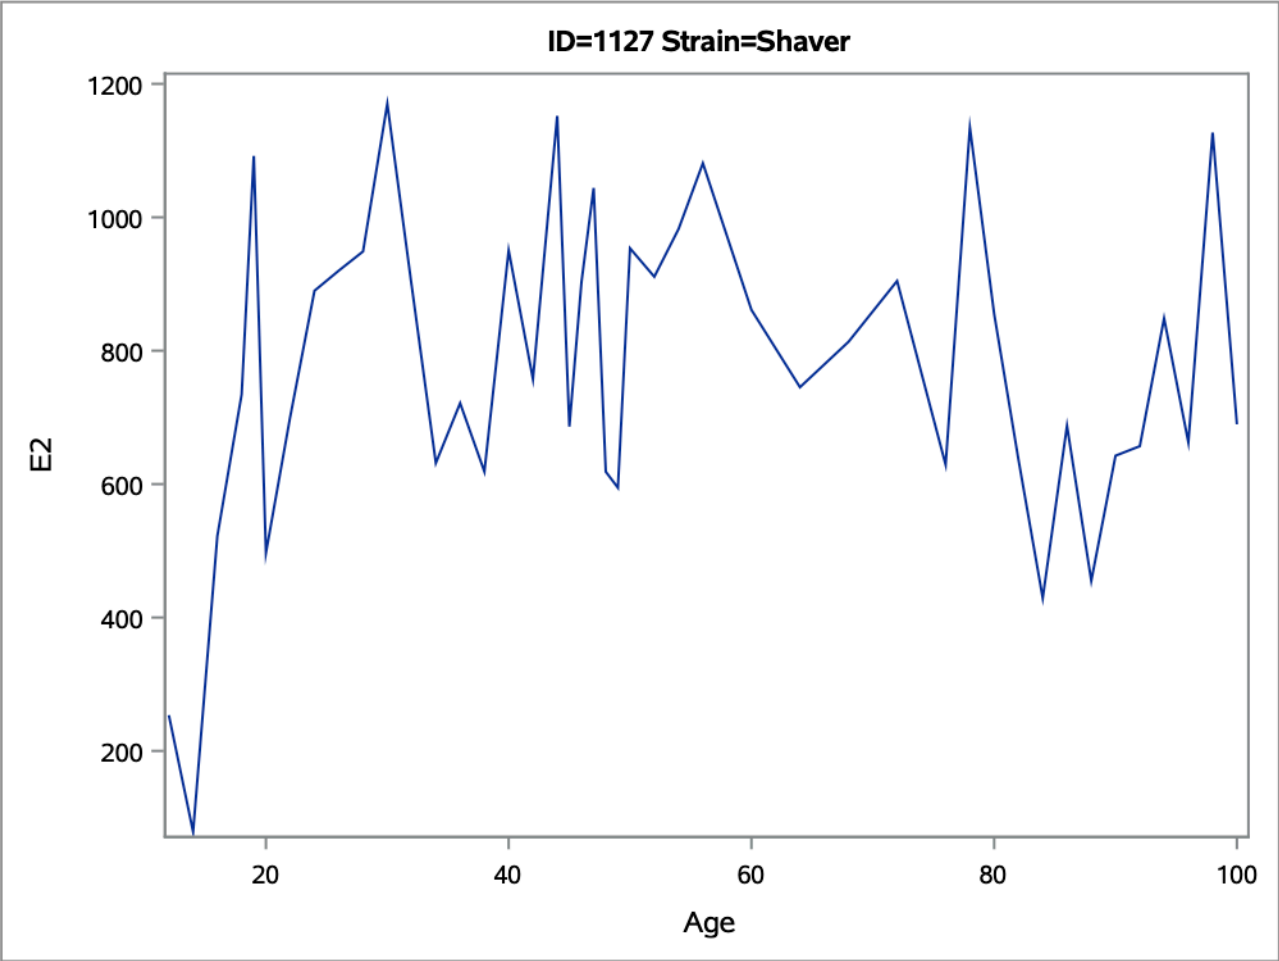

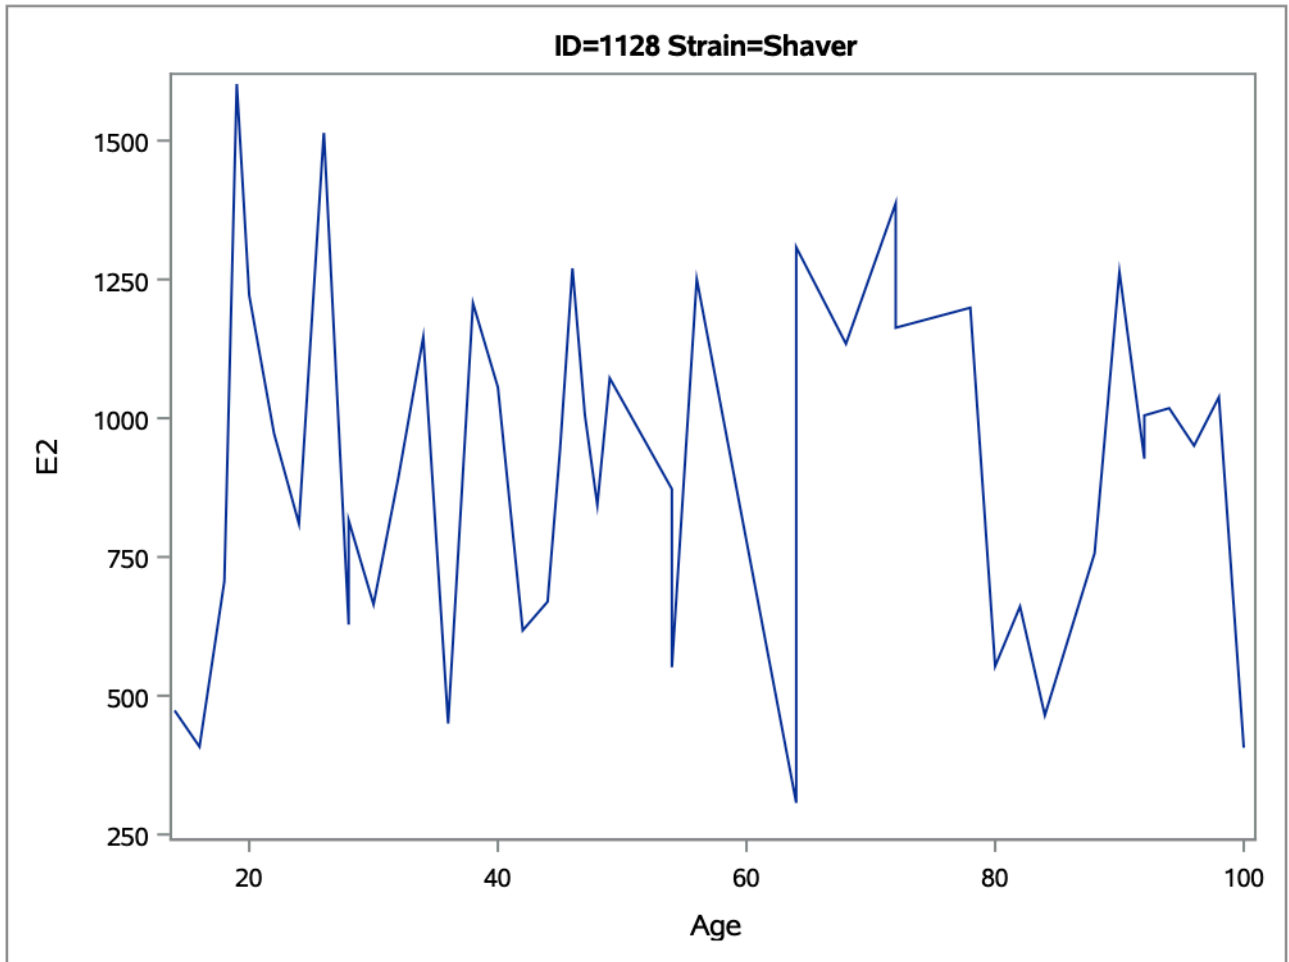

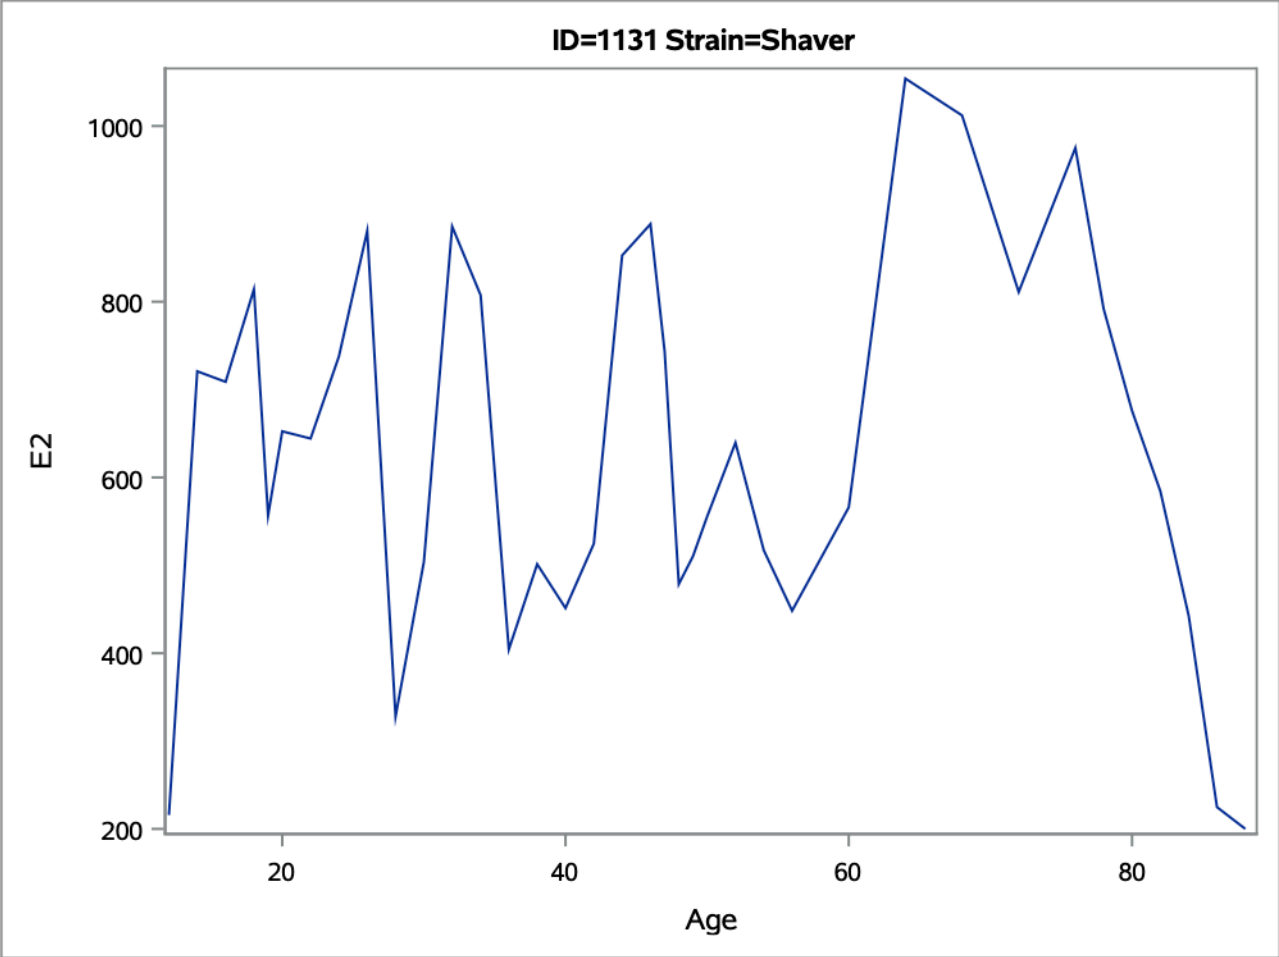

ID=1139 Strain=Shaver

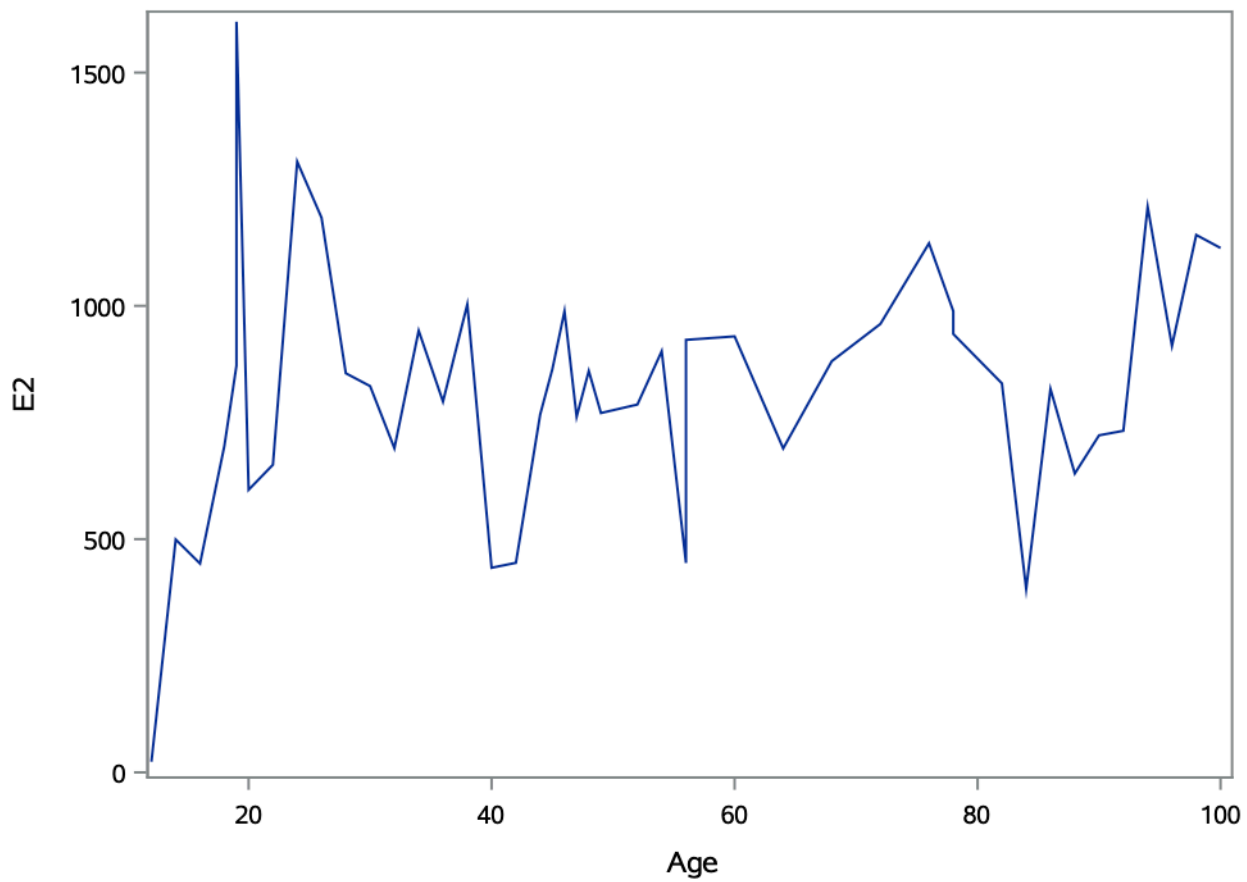



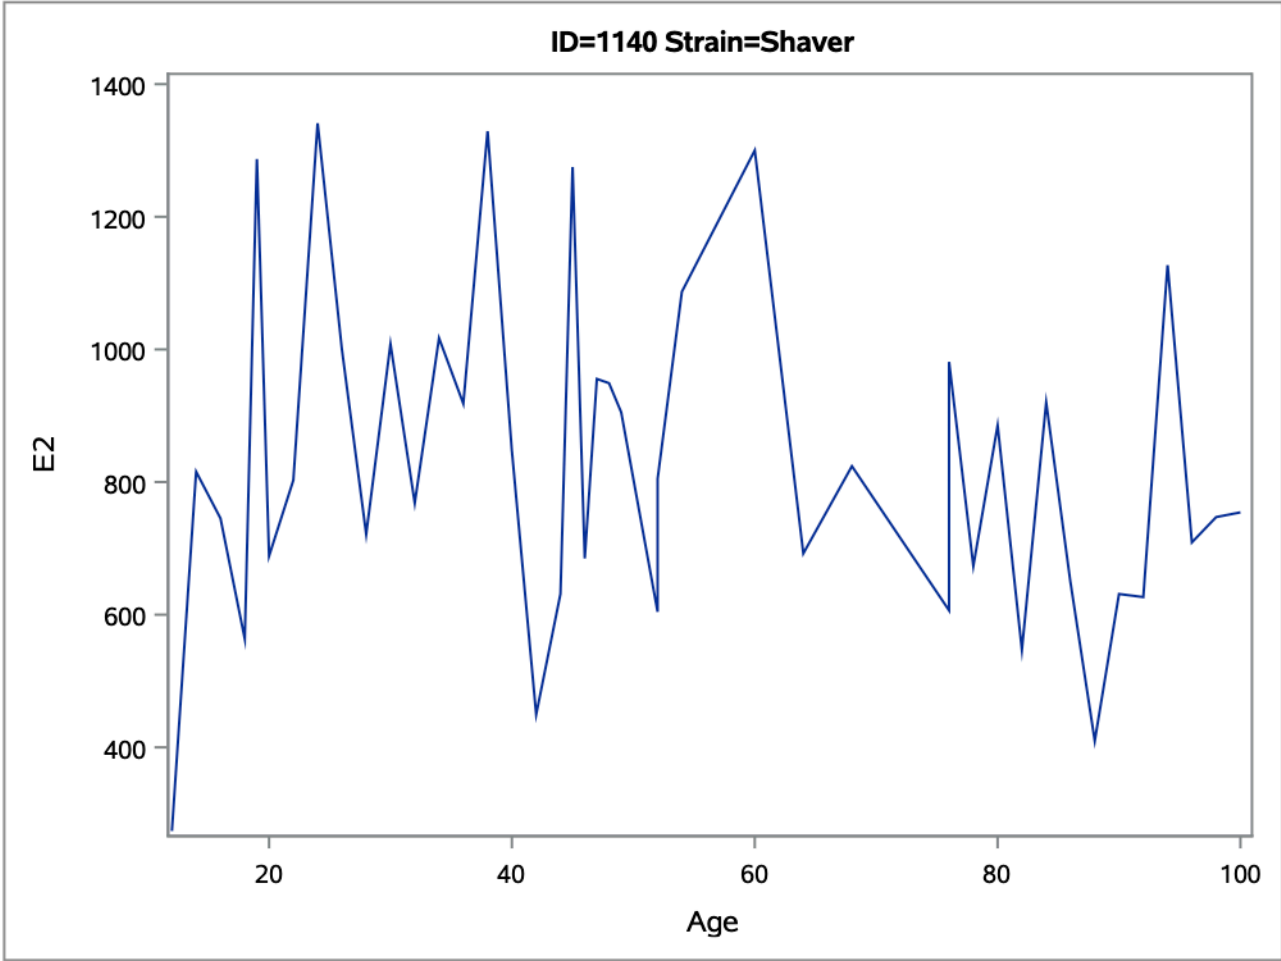

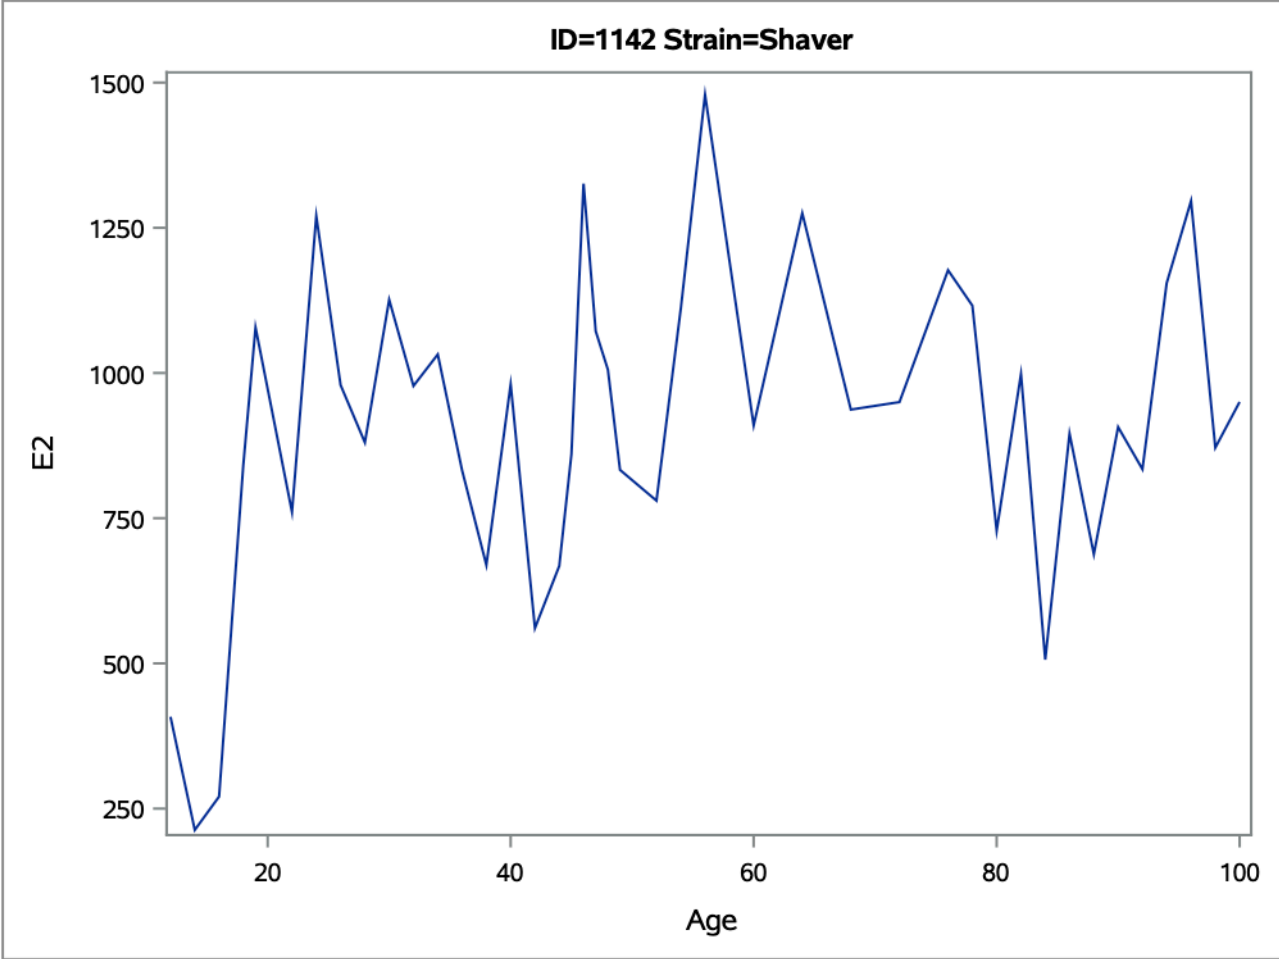

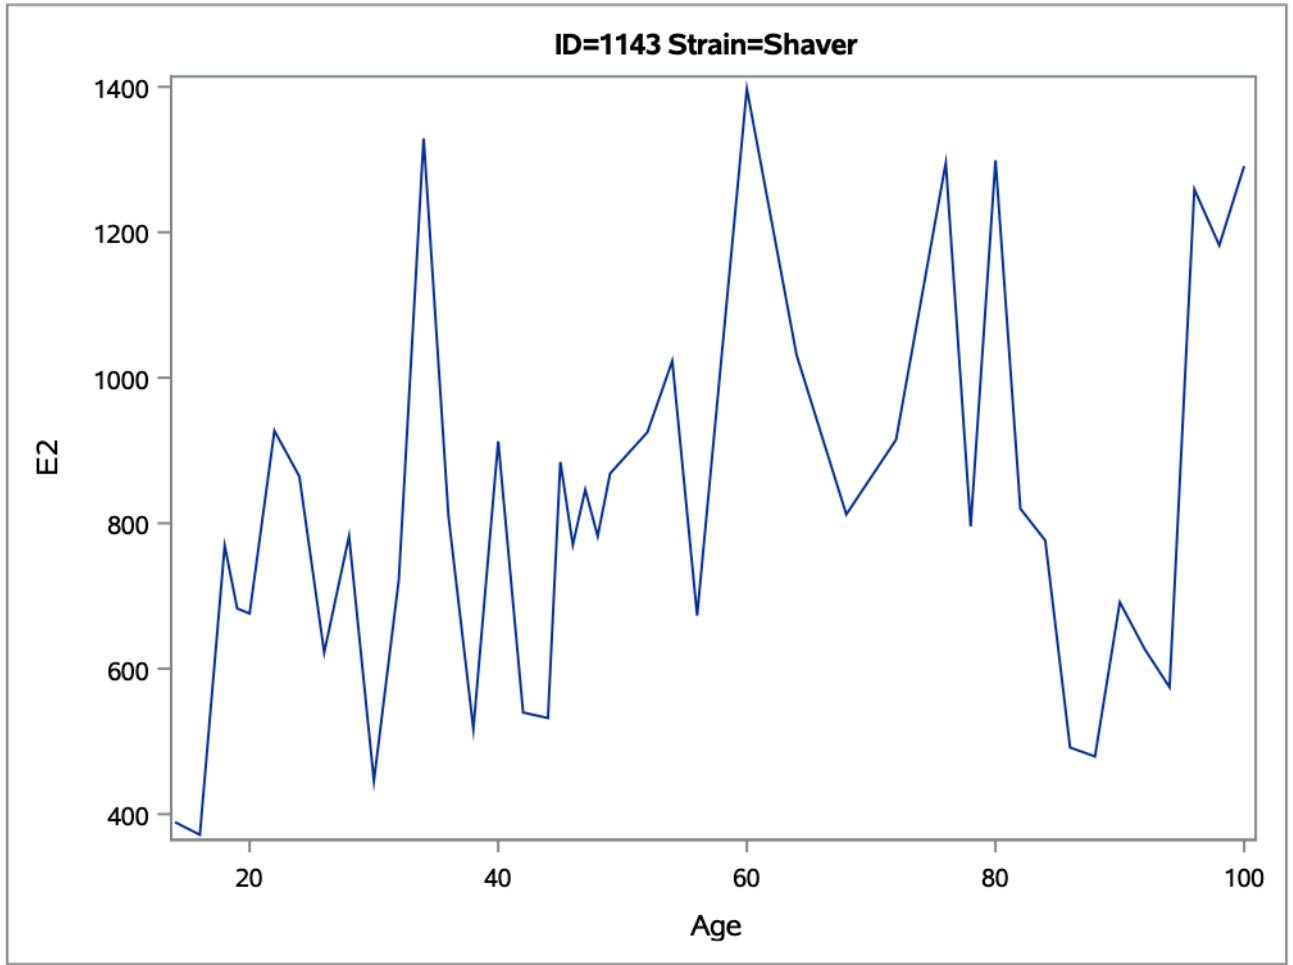

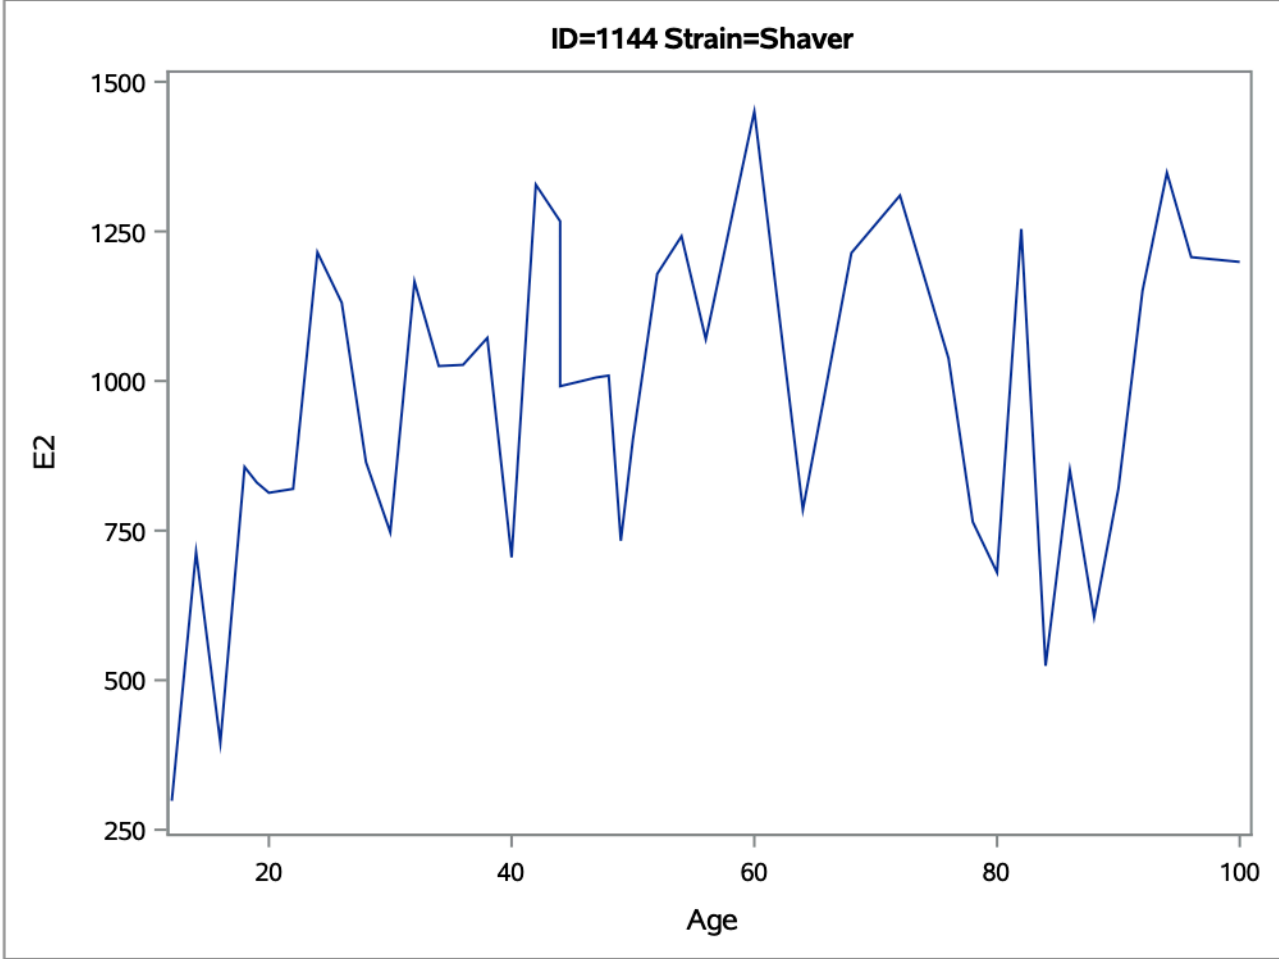

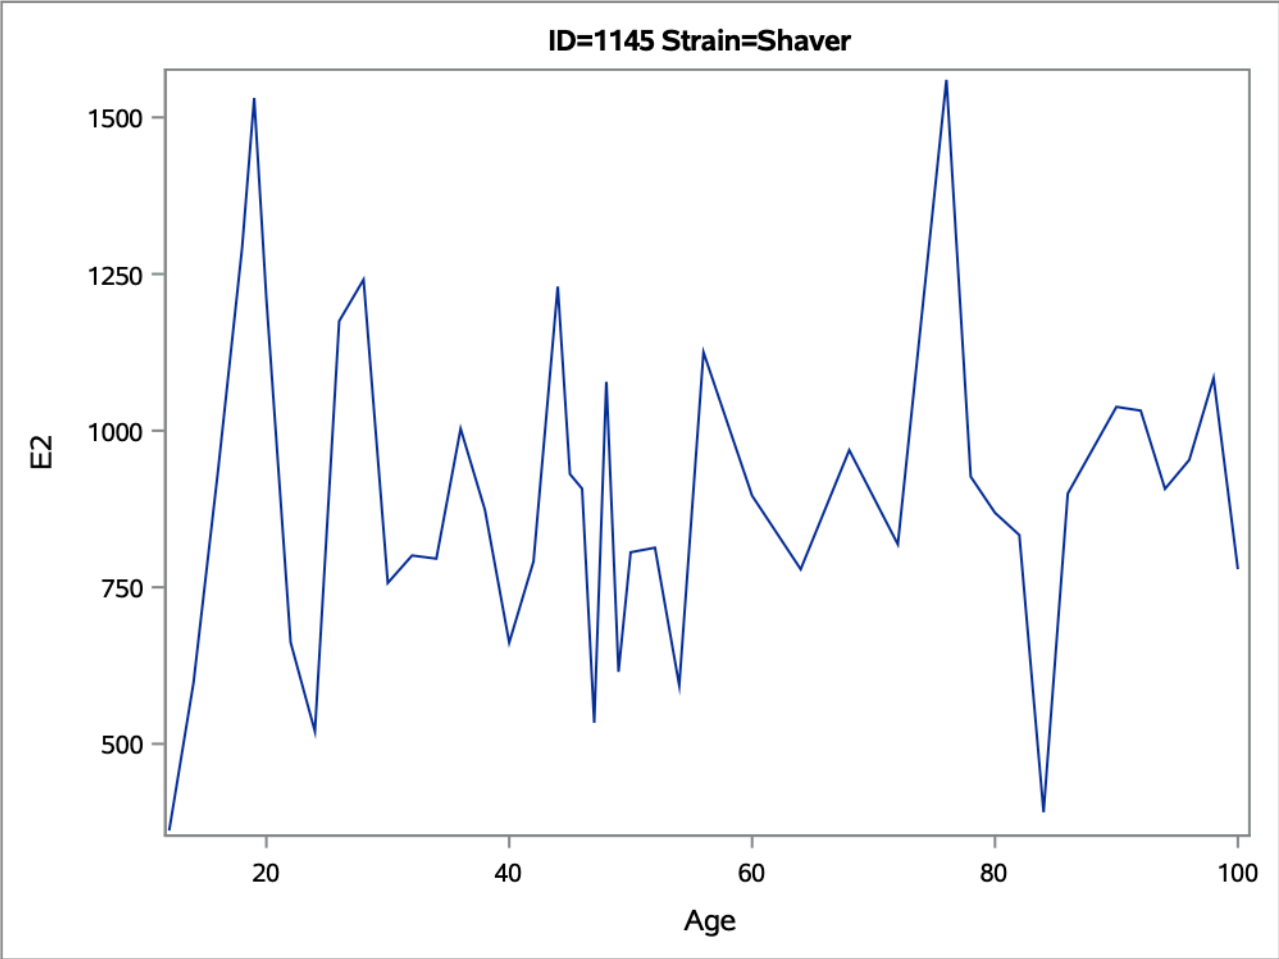

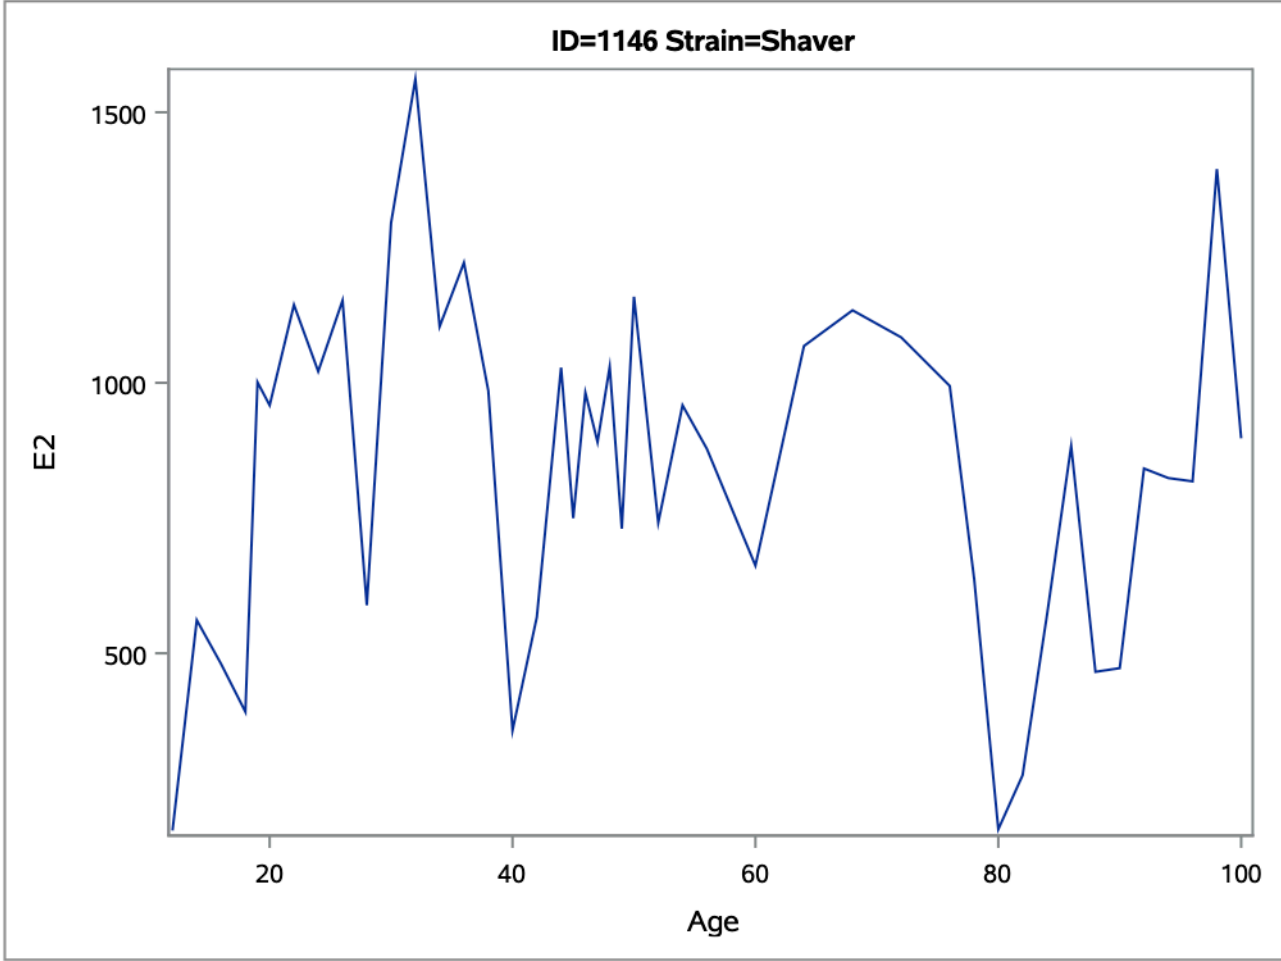

ID=1147 Strain=Shaver

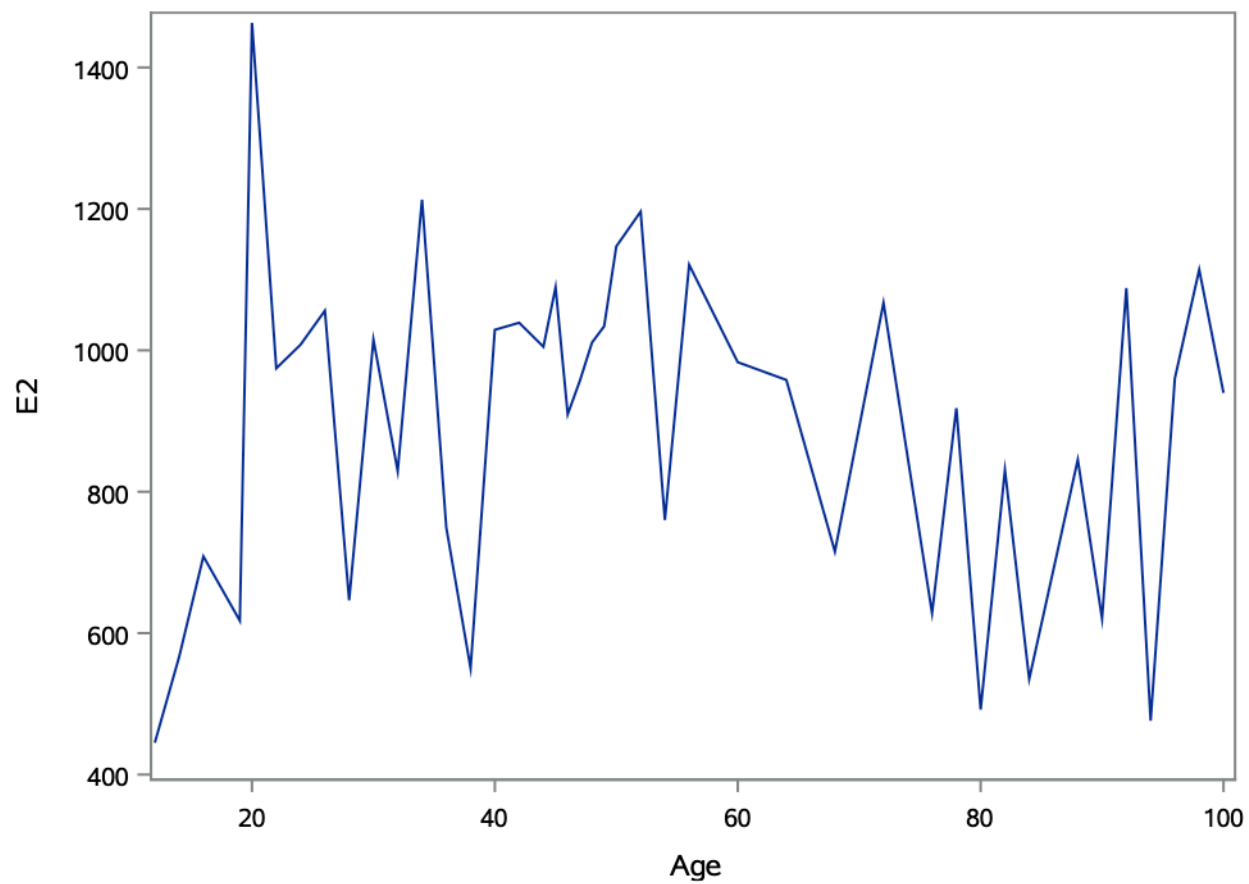

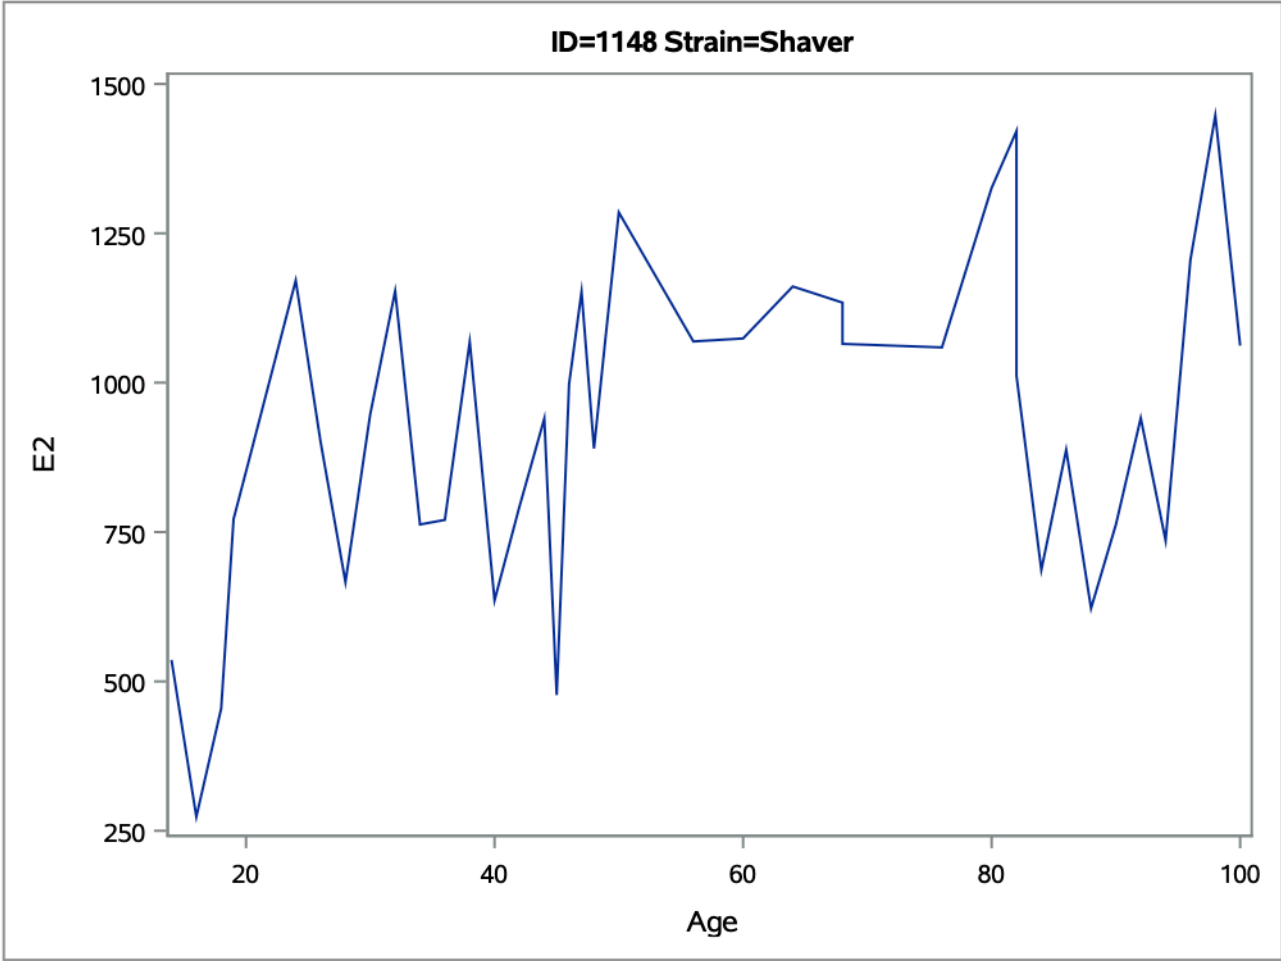



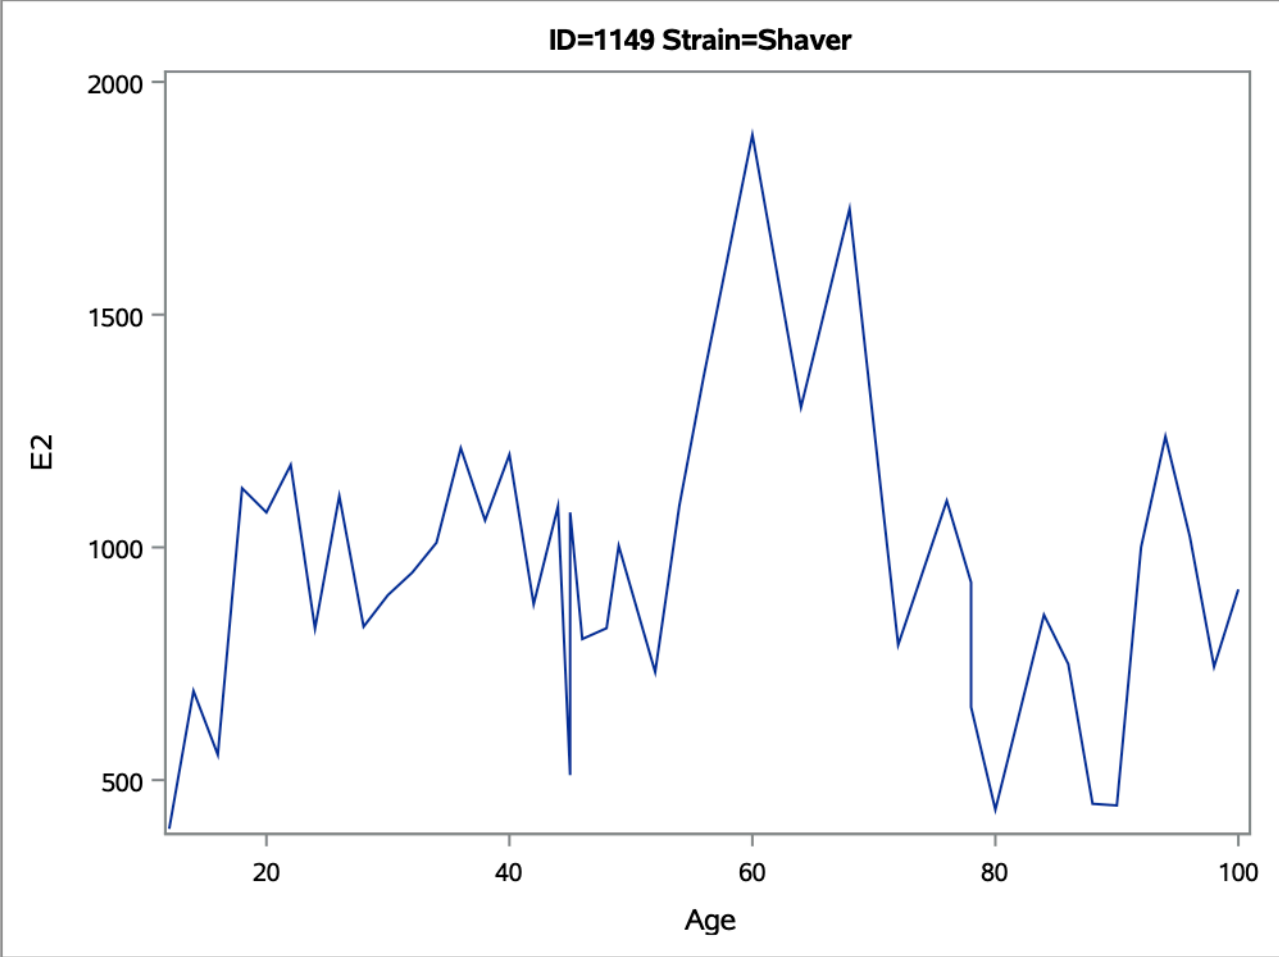

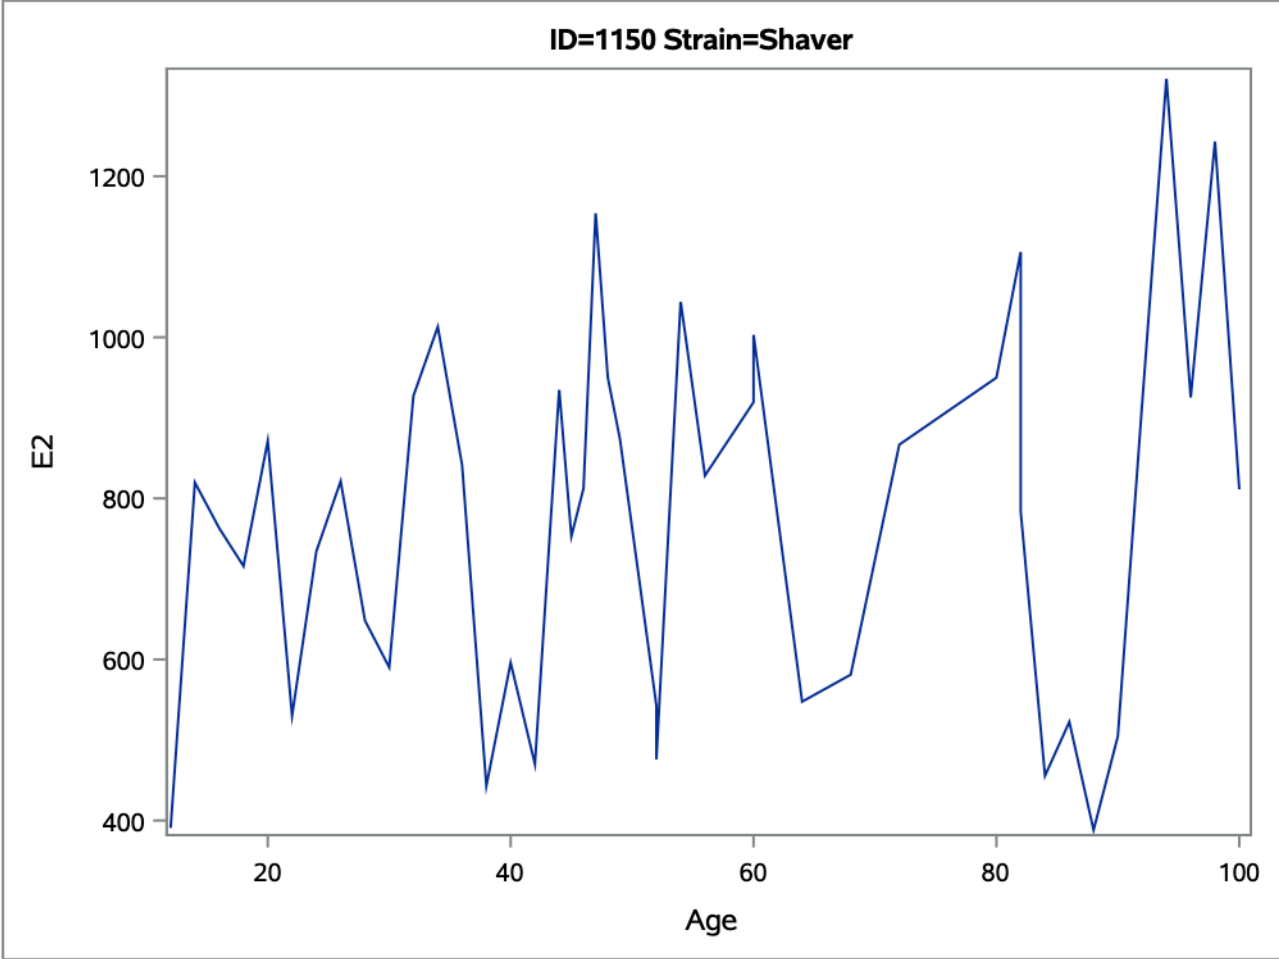

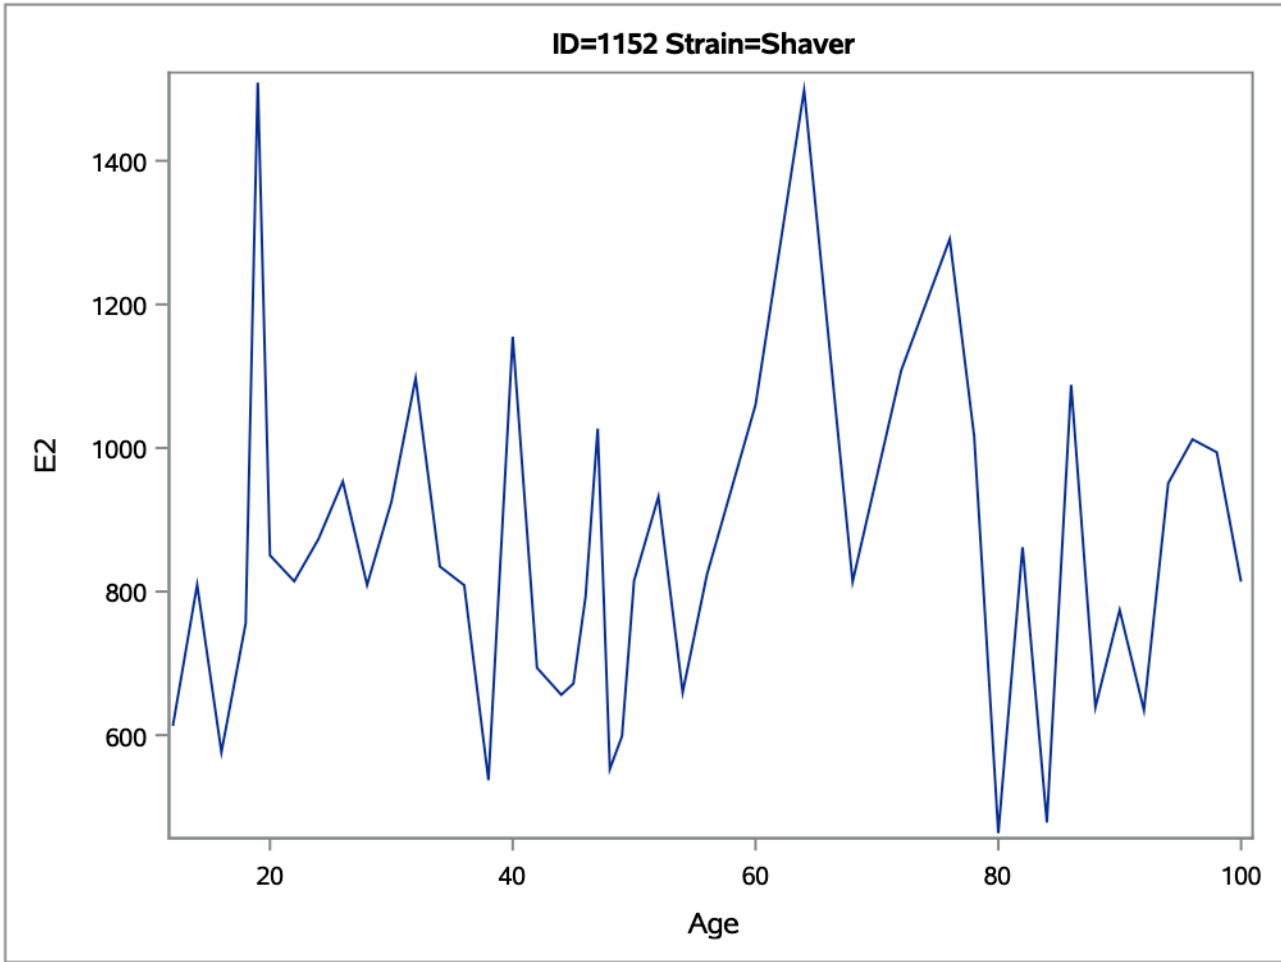

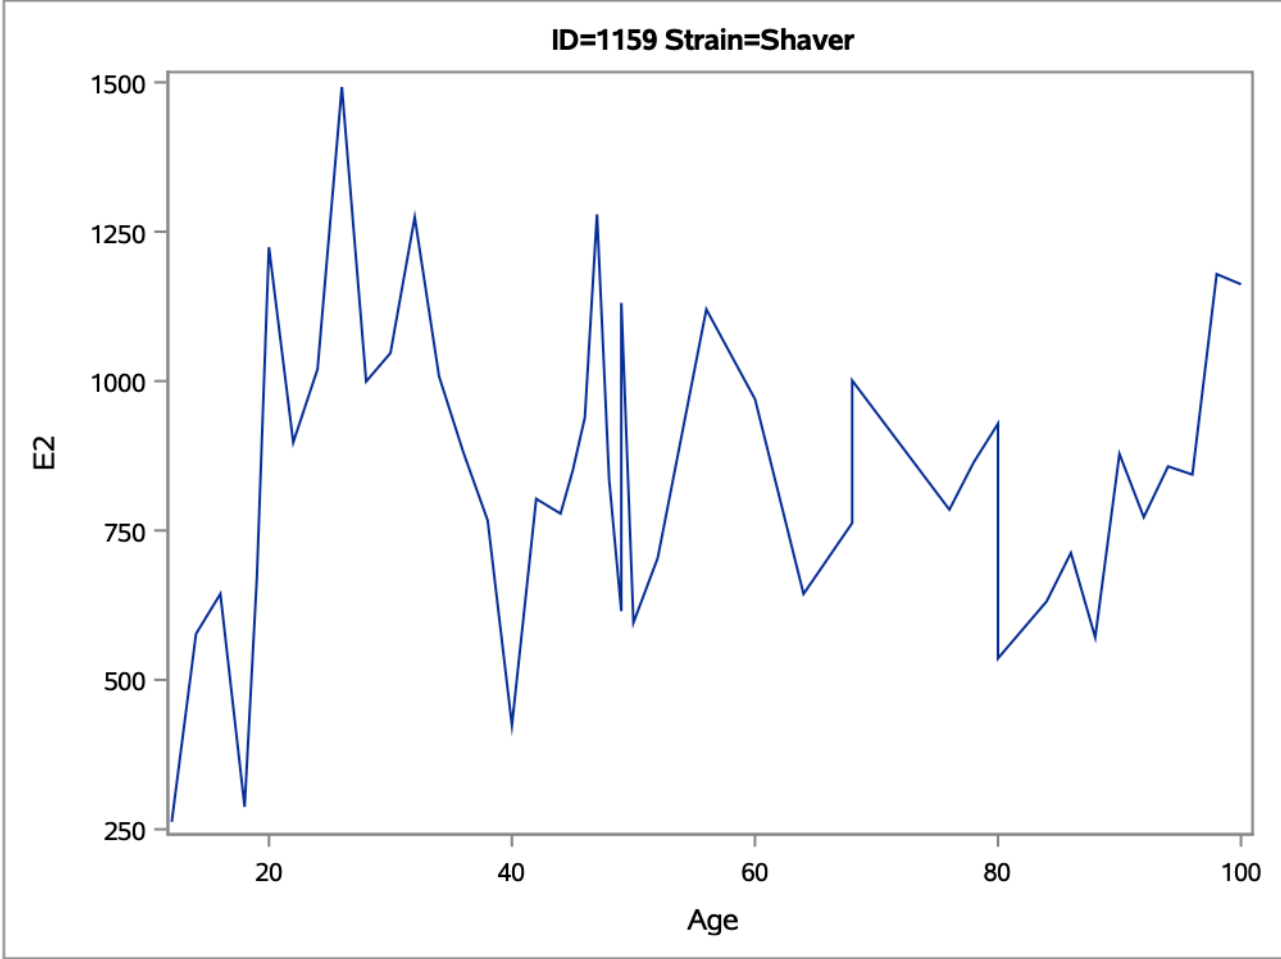

ID=1163 Strain=Shaver

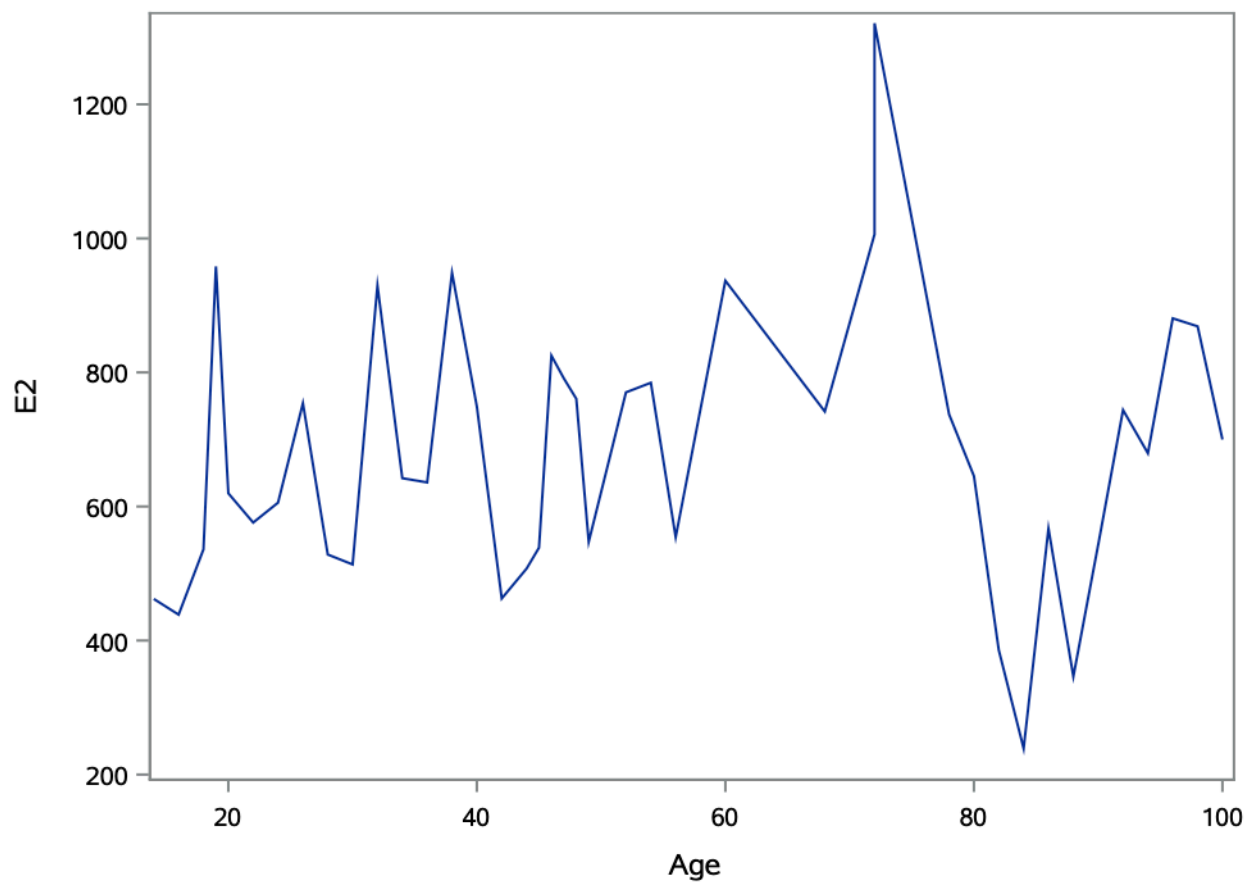

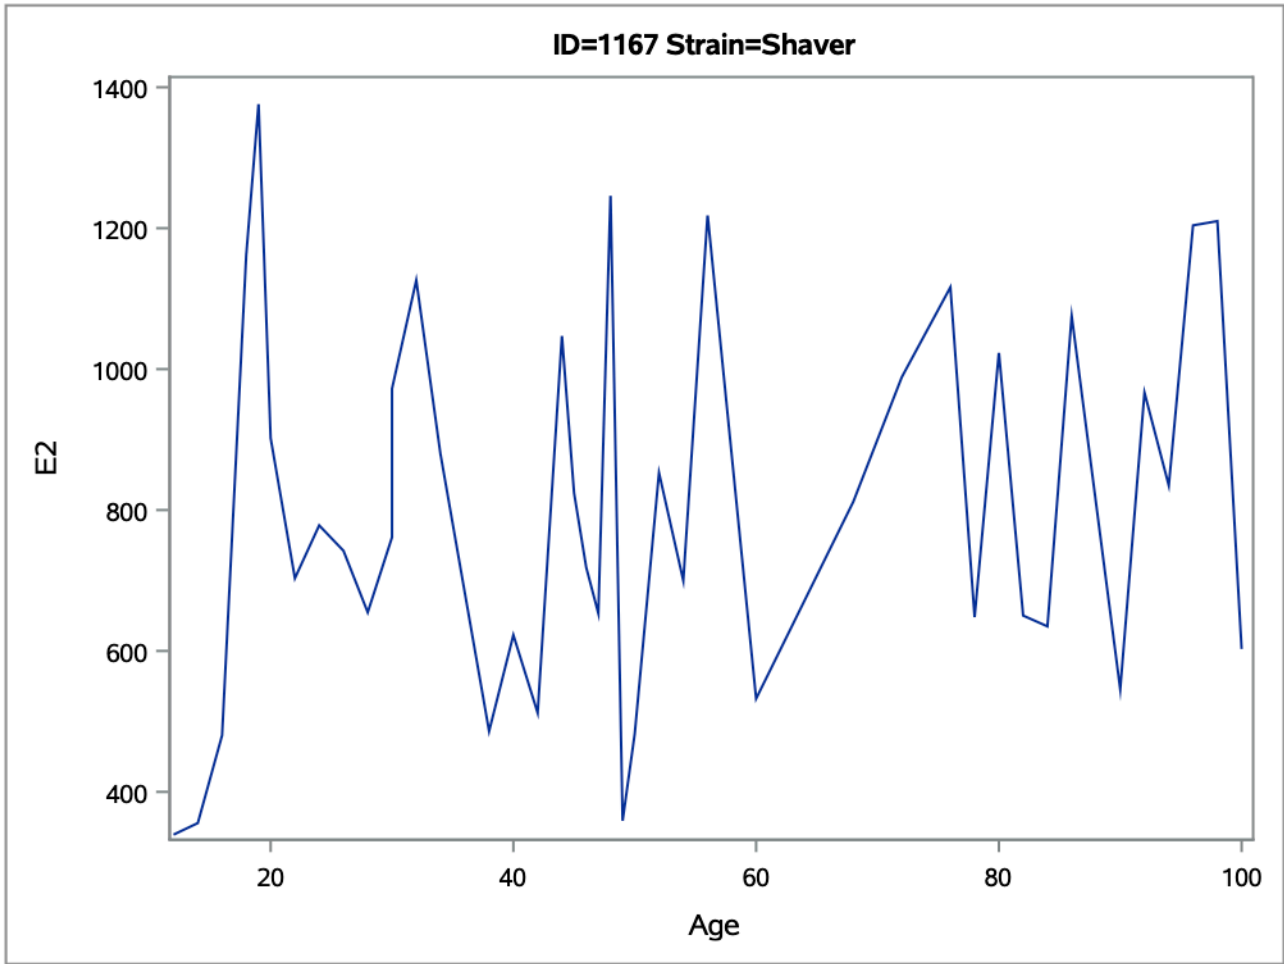

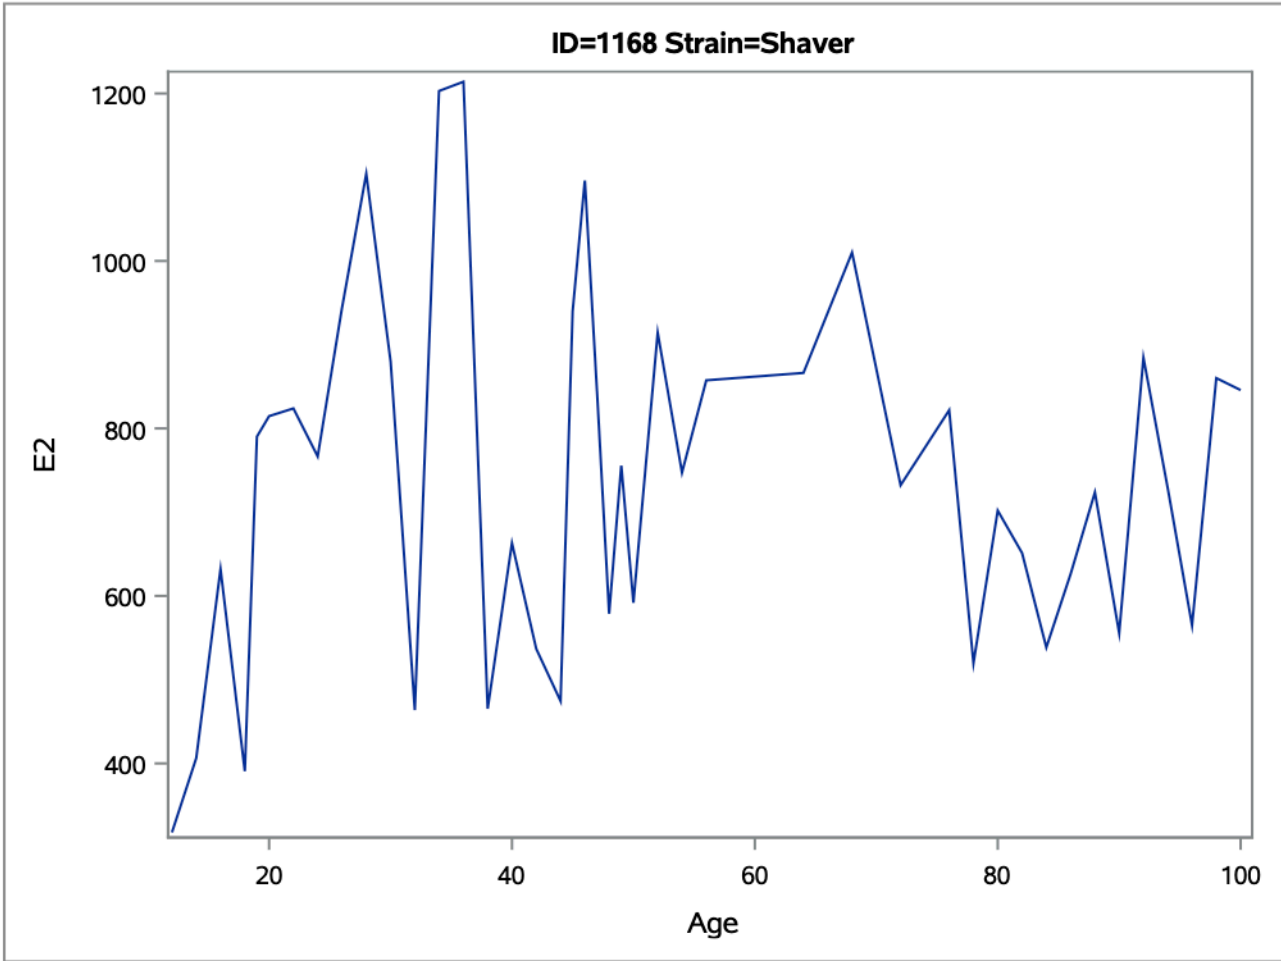

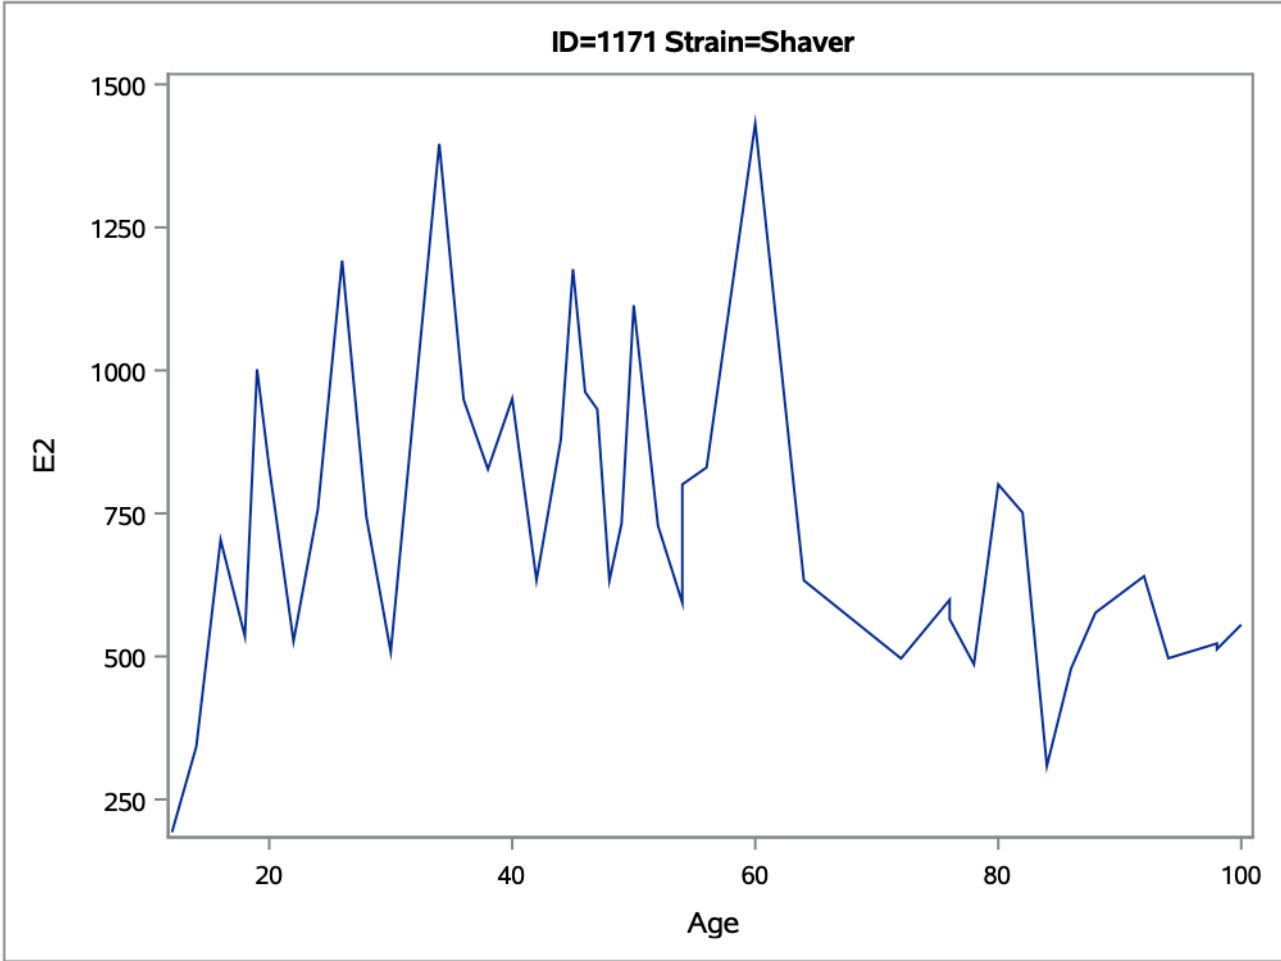



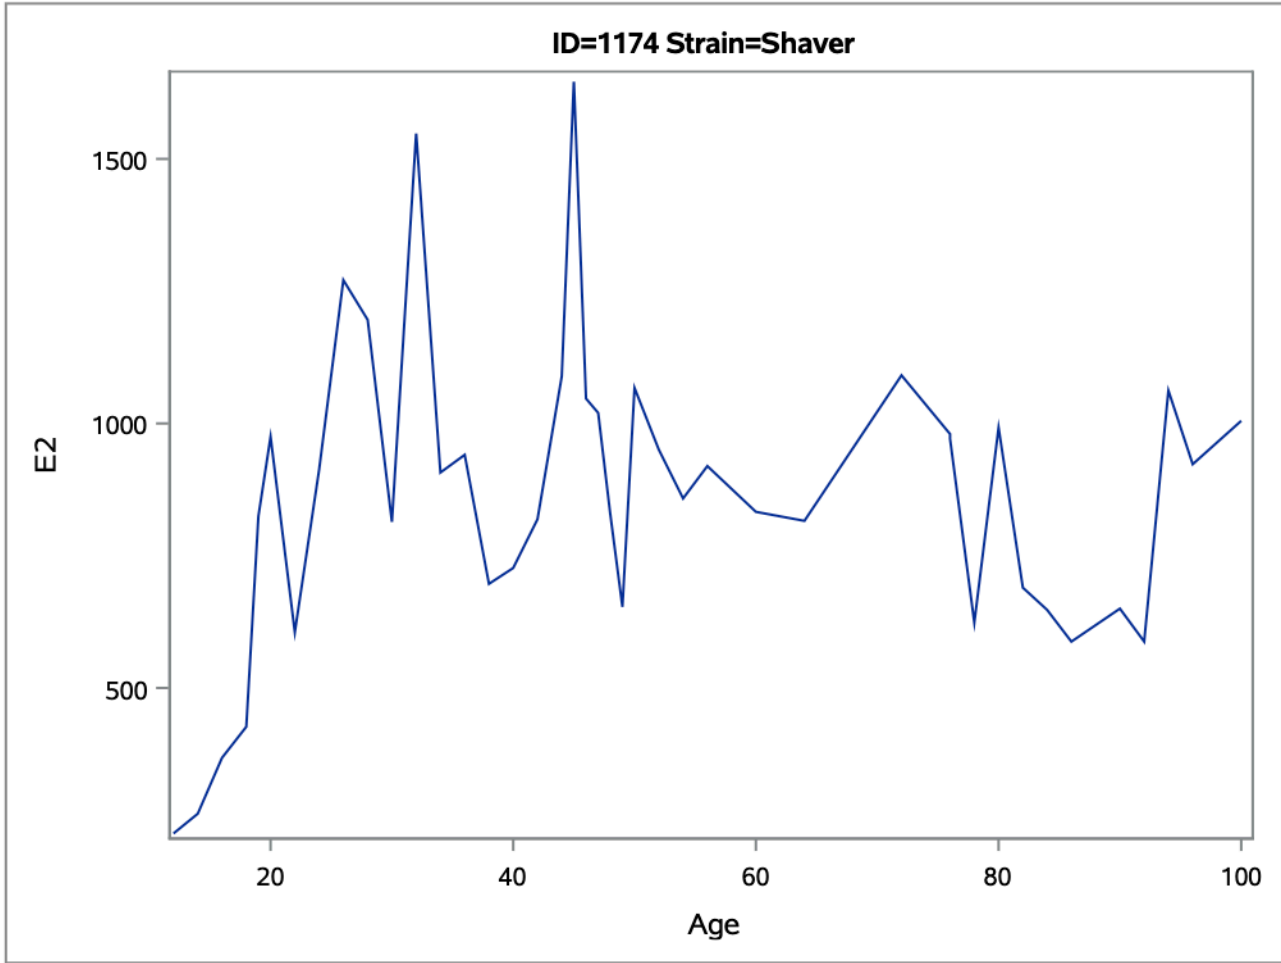

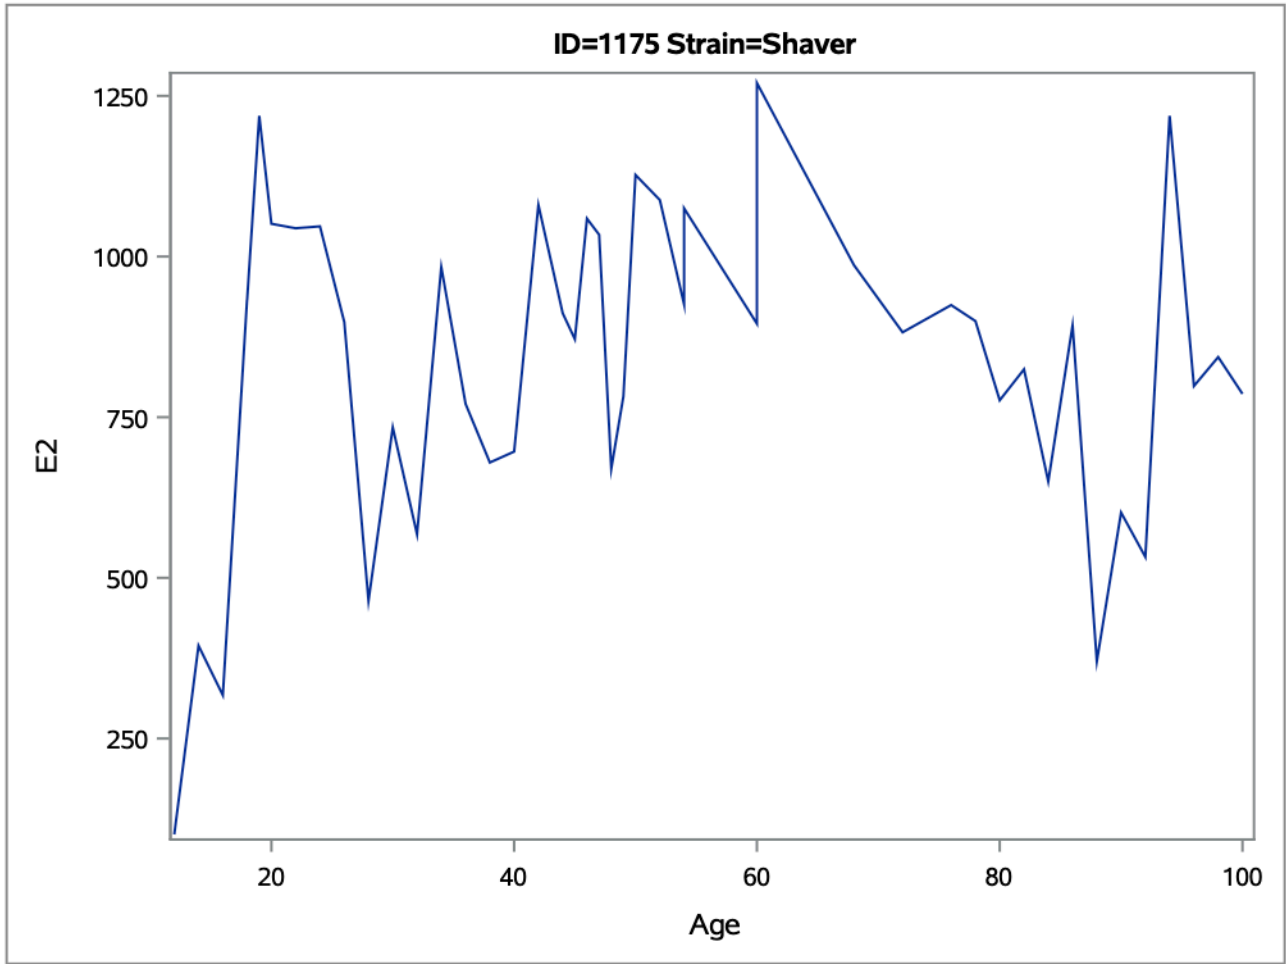

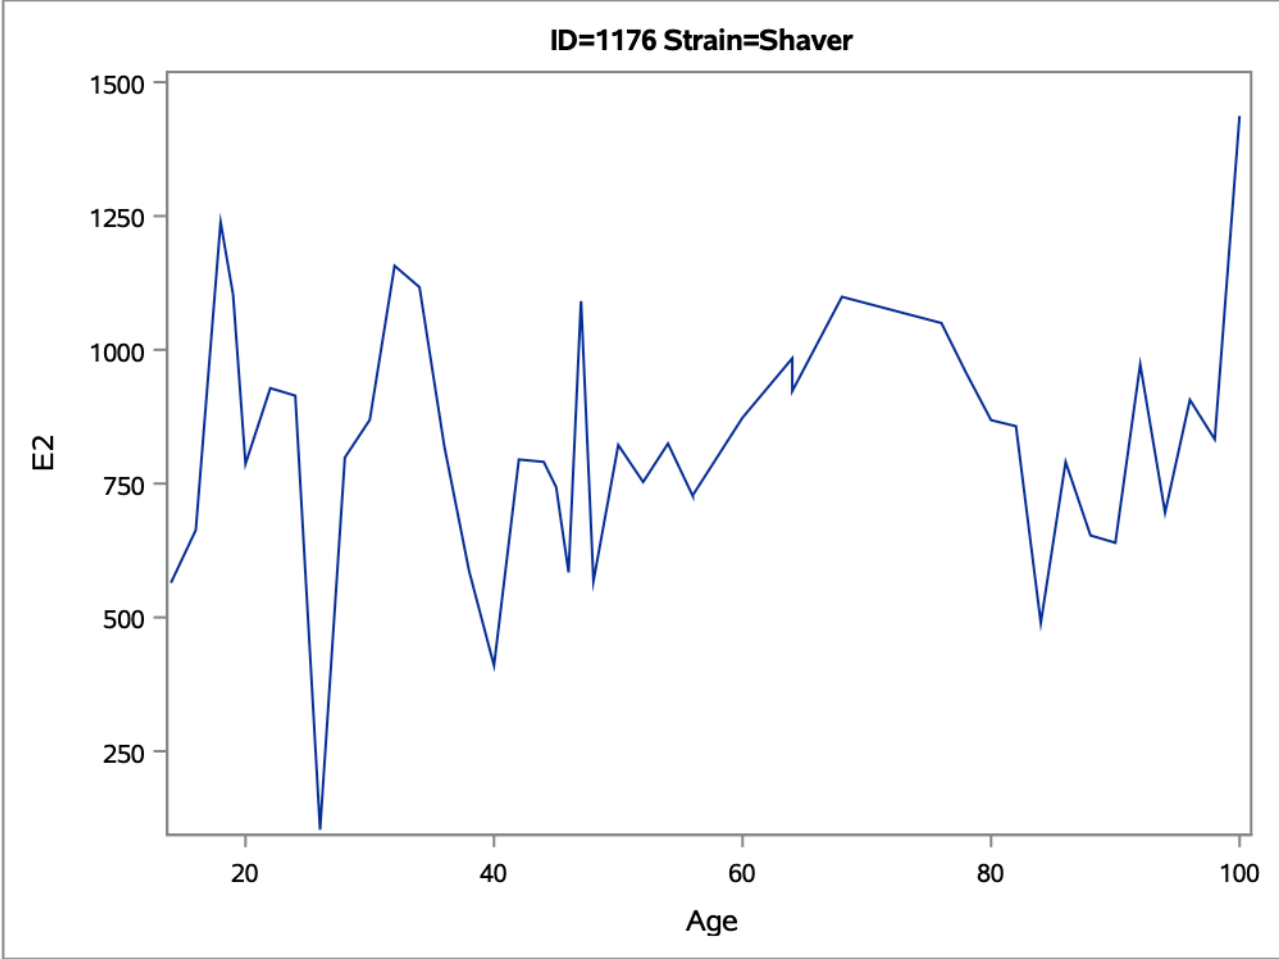

ID=1177 Strain=Shaver

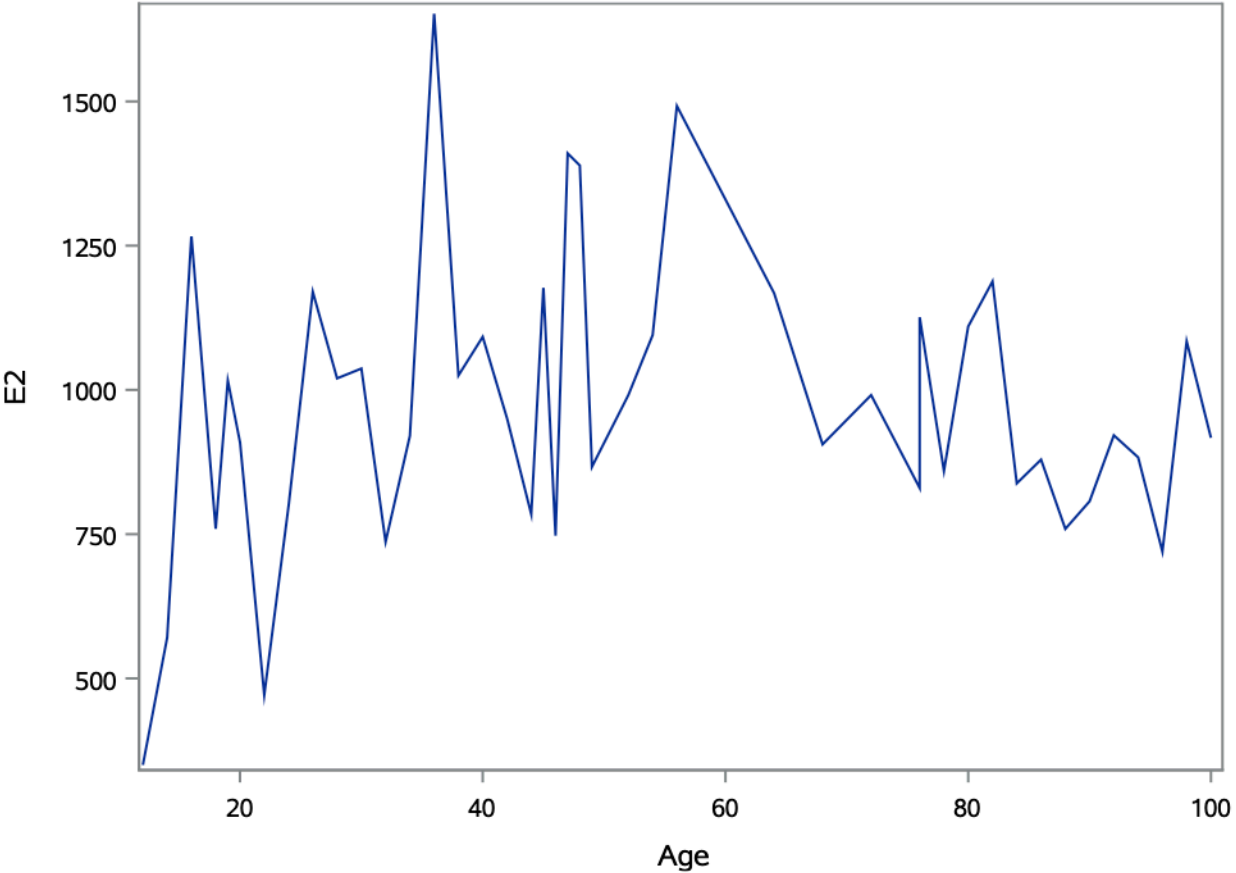

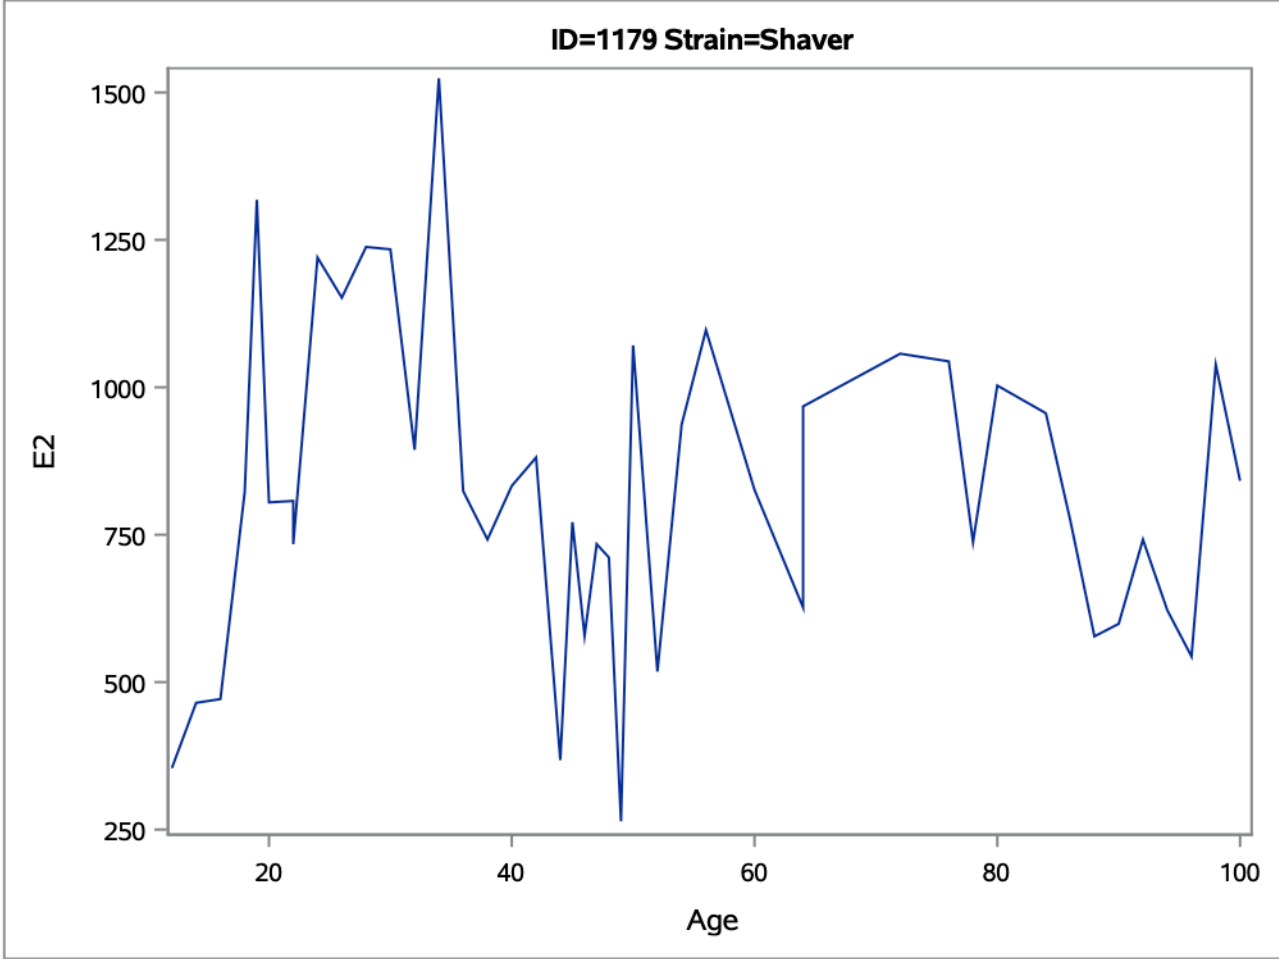

ID=1180 Strain=Shaver

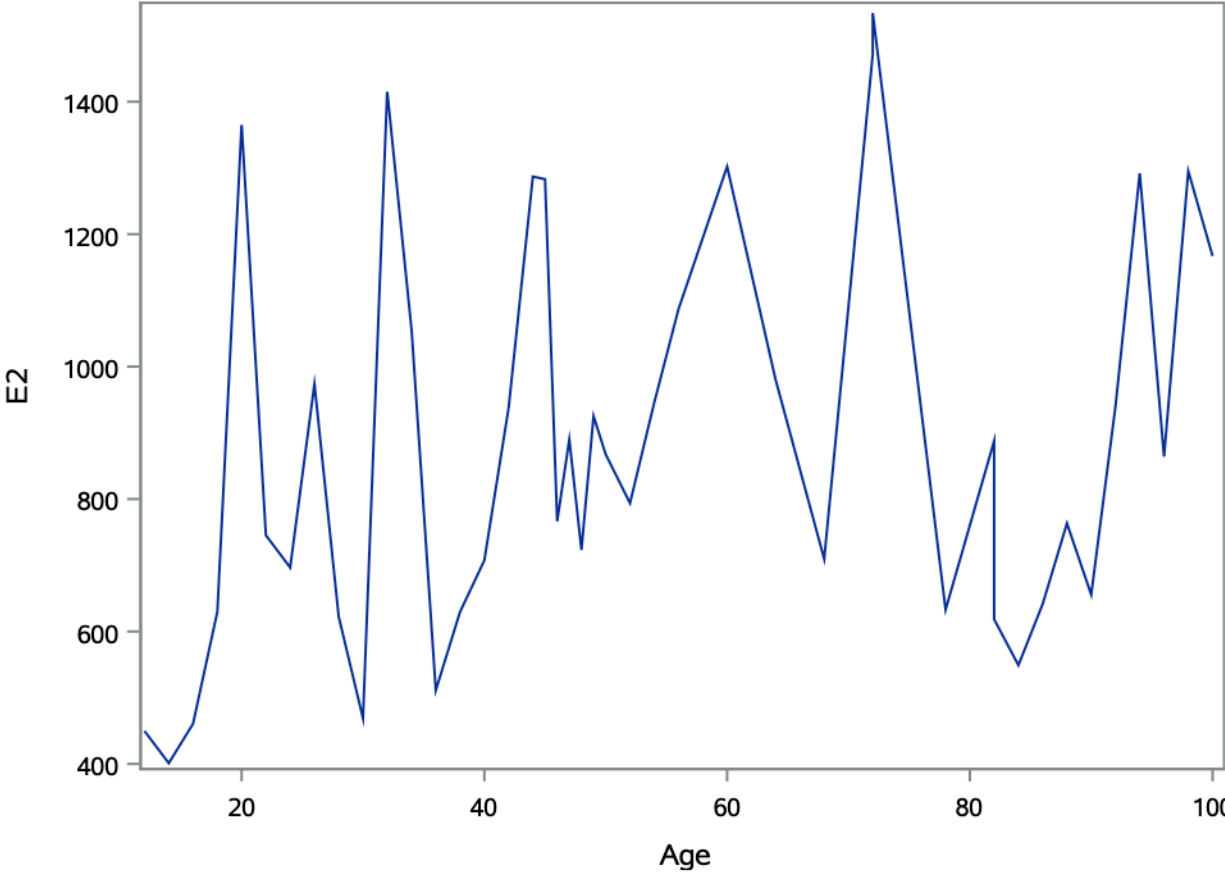

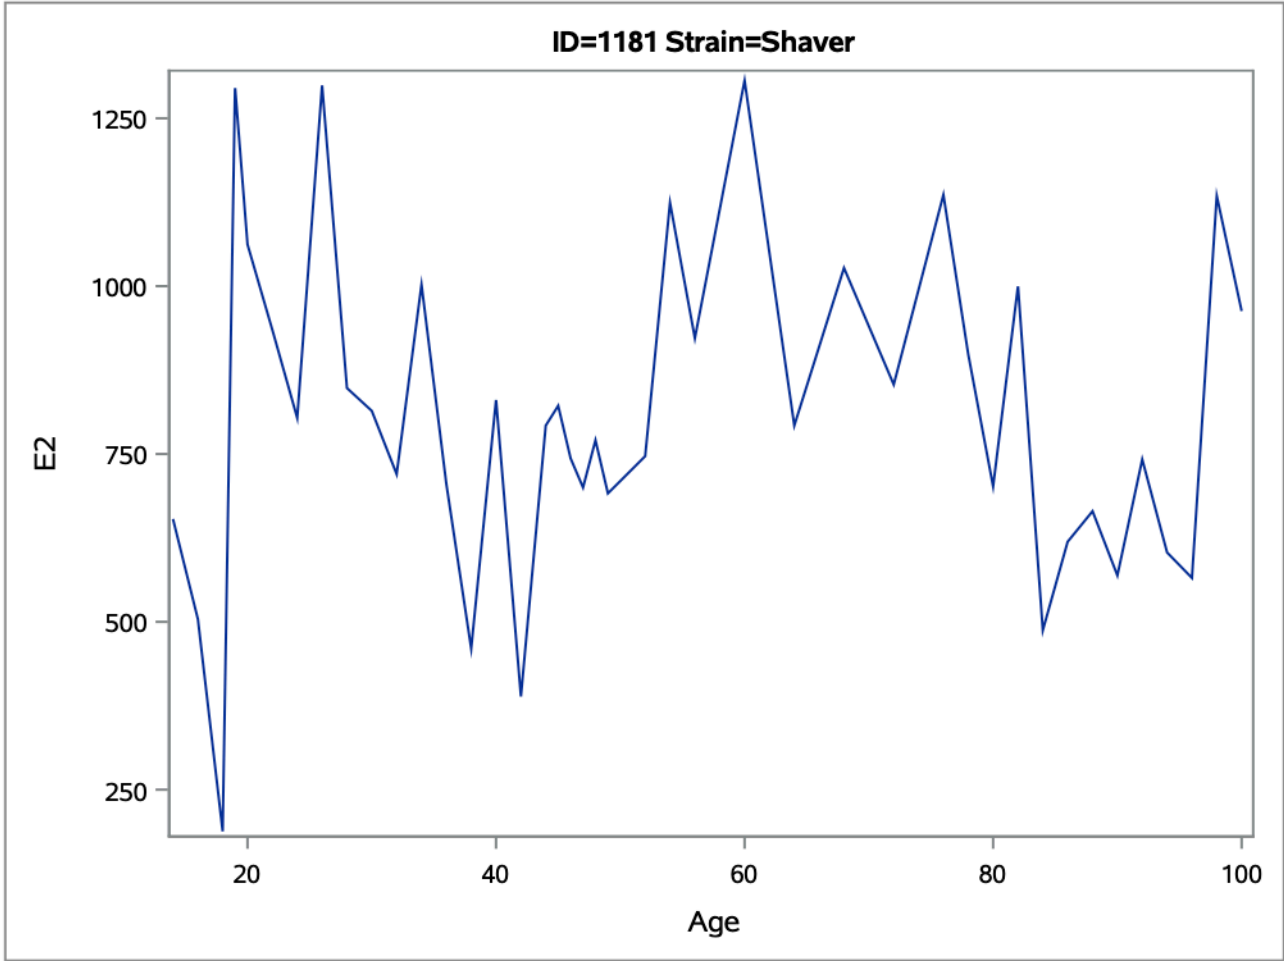

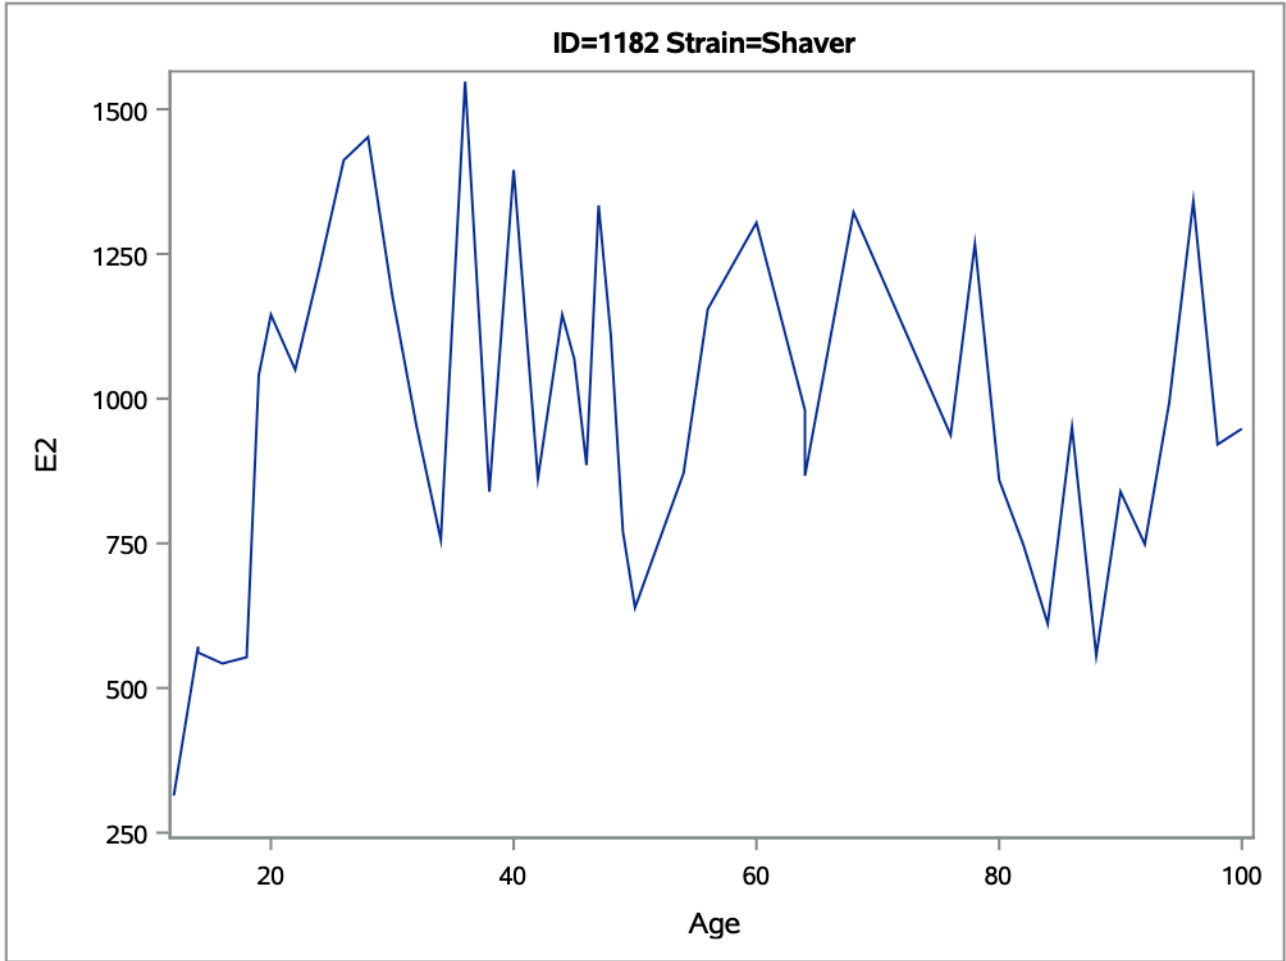



ID=1185 Strain=Shaver

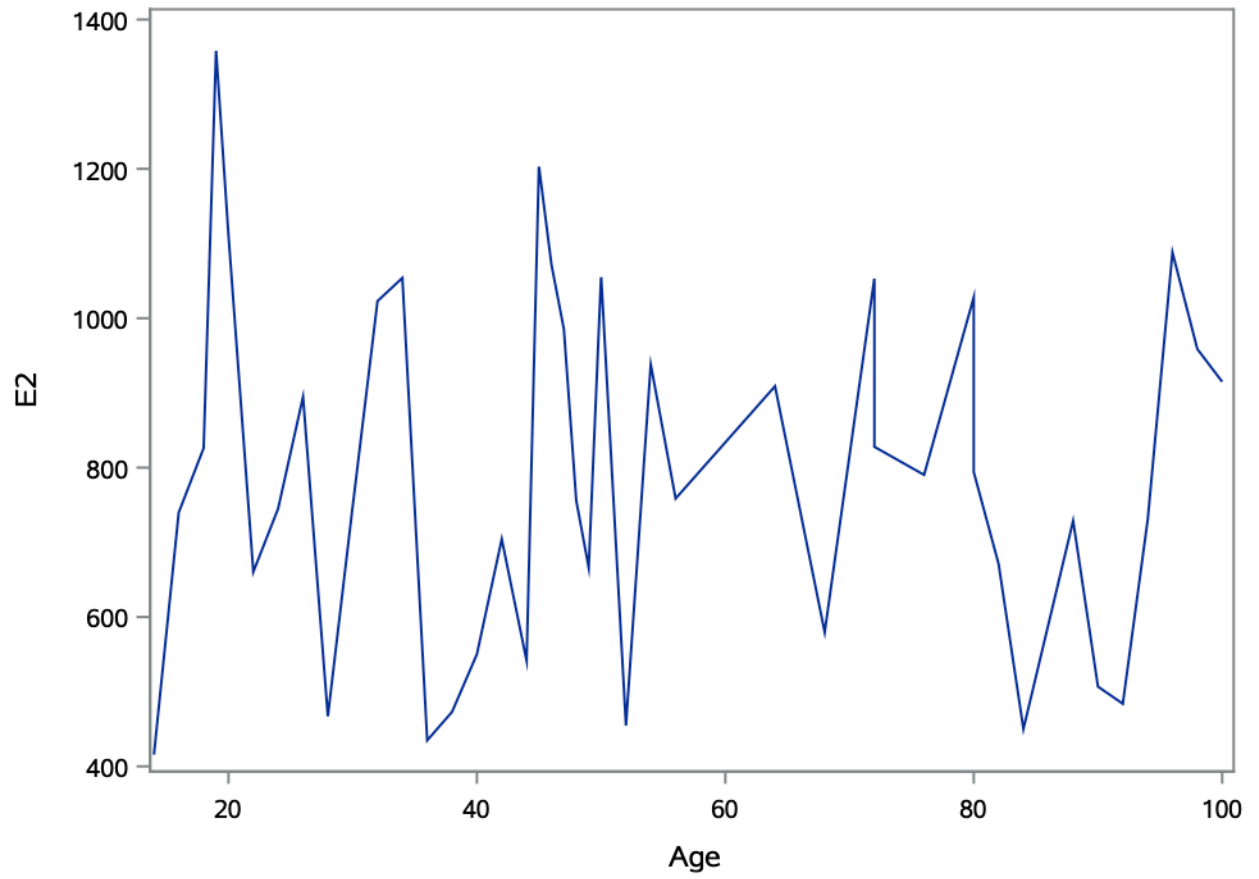

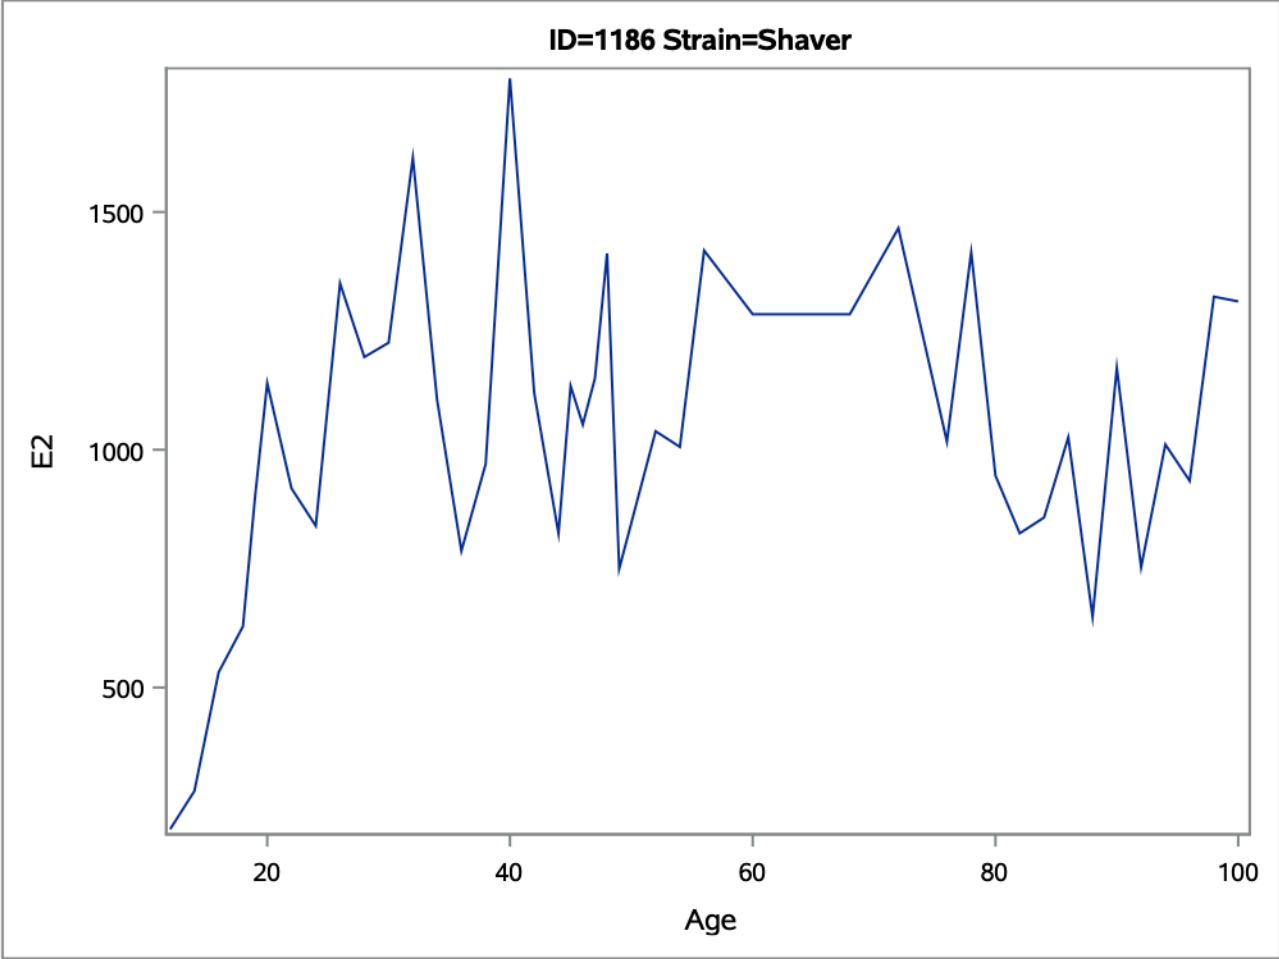

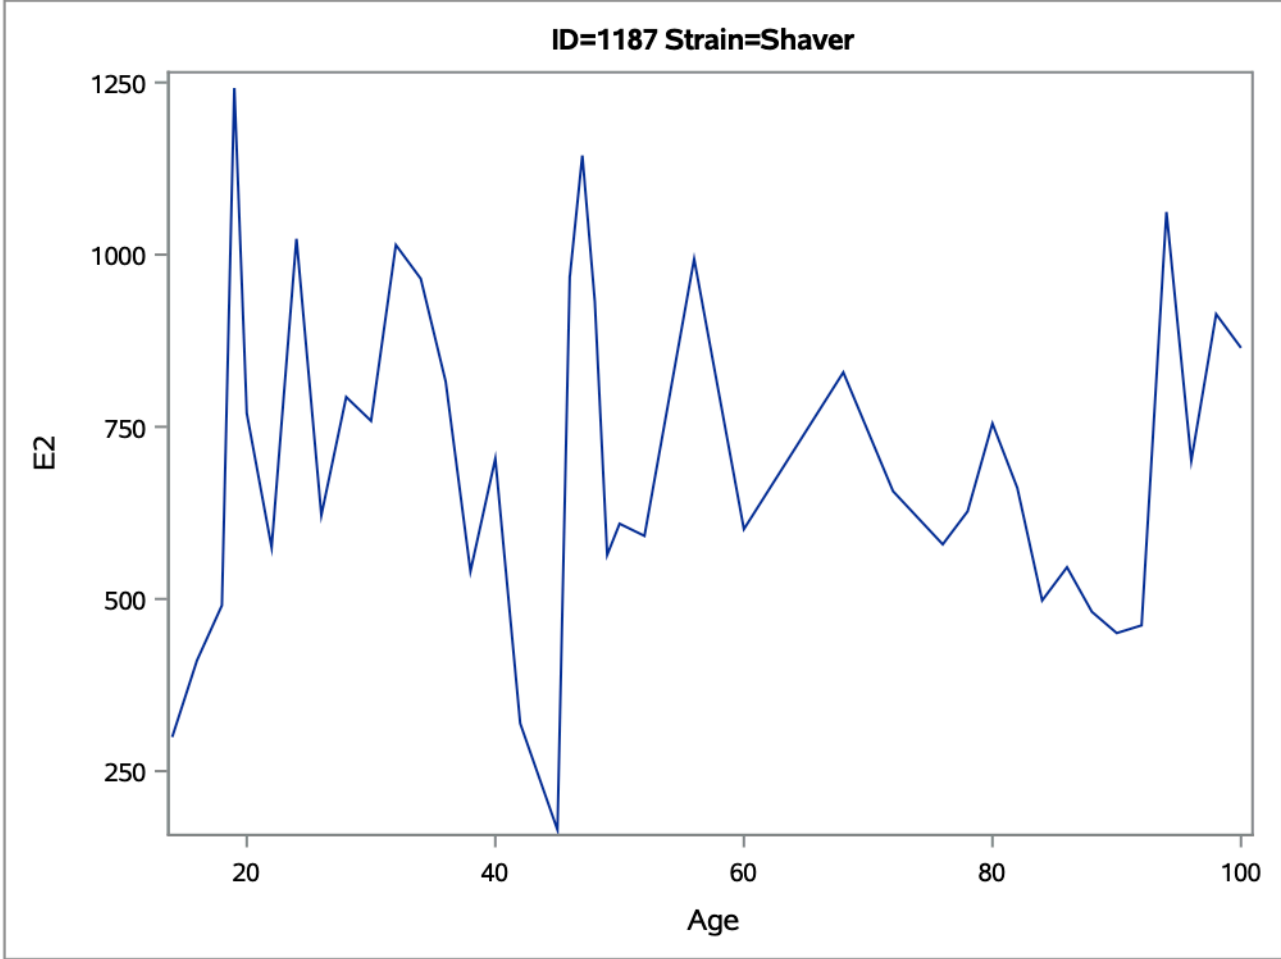

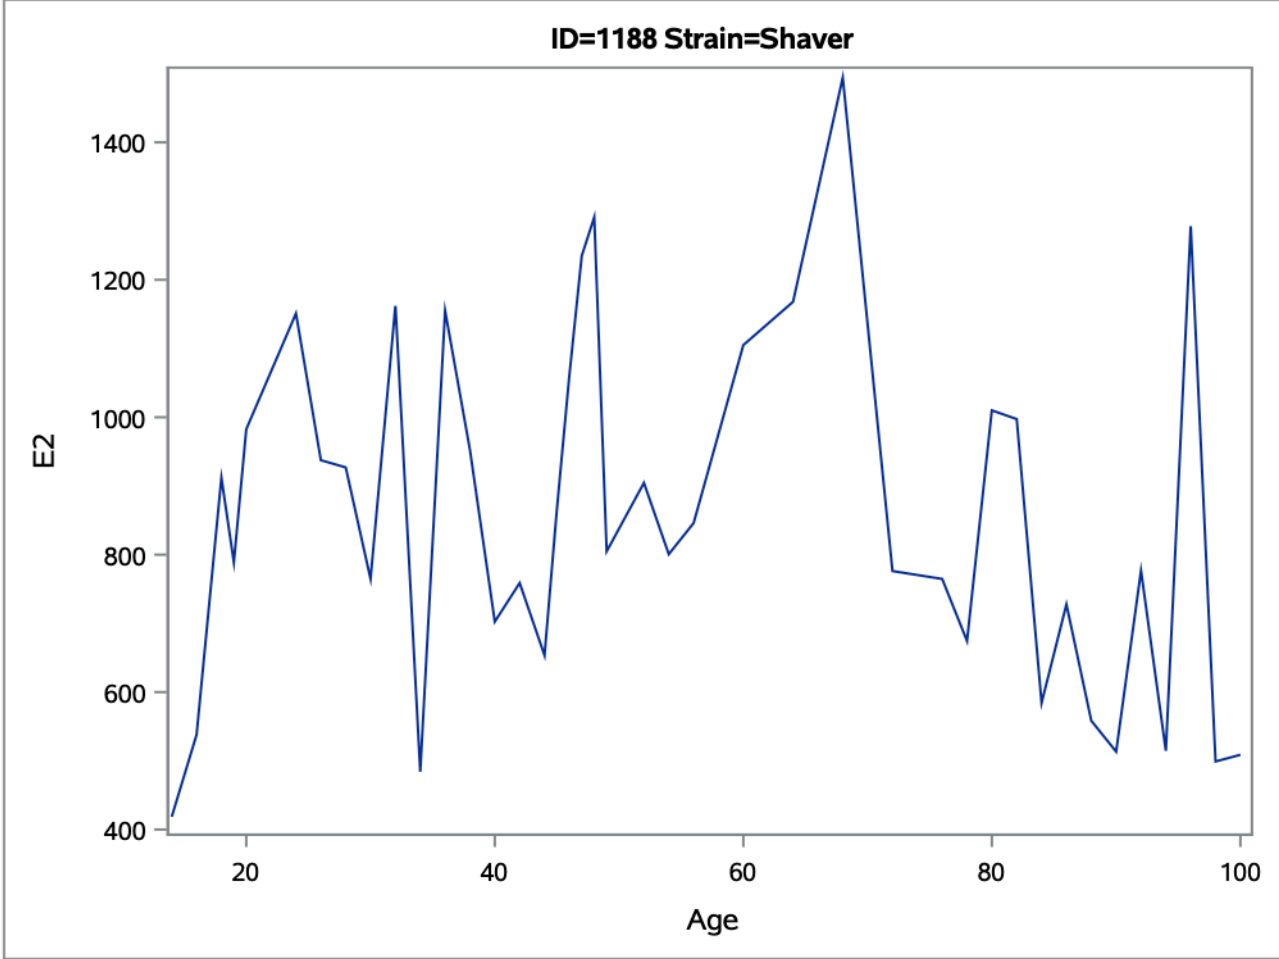

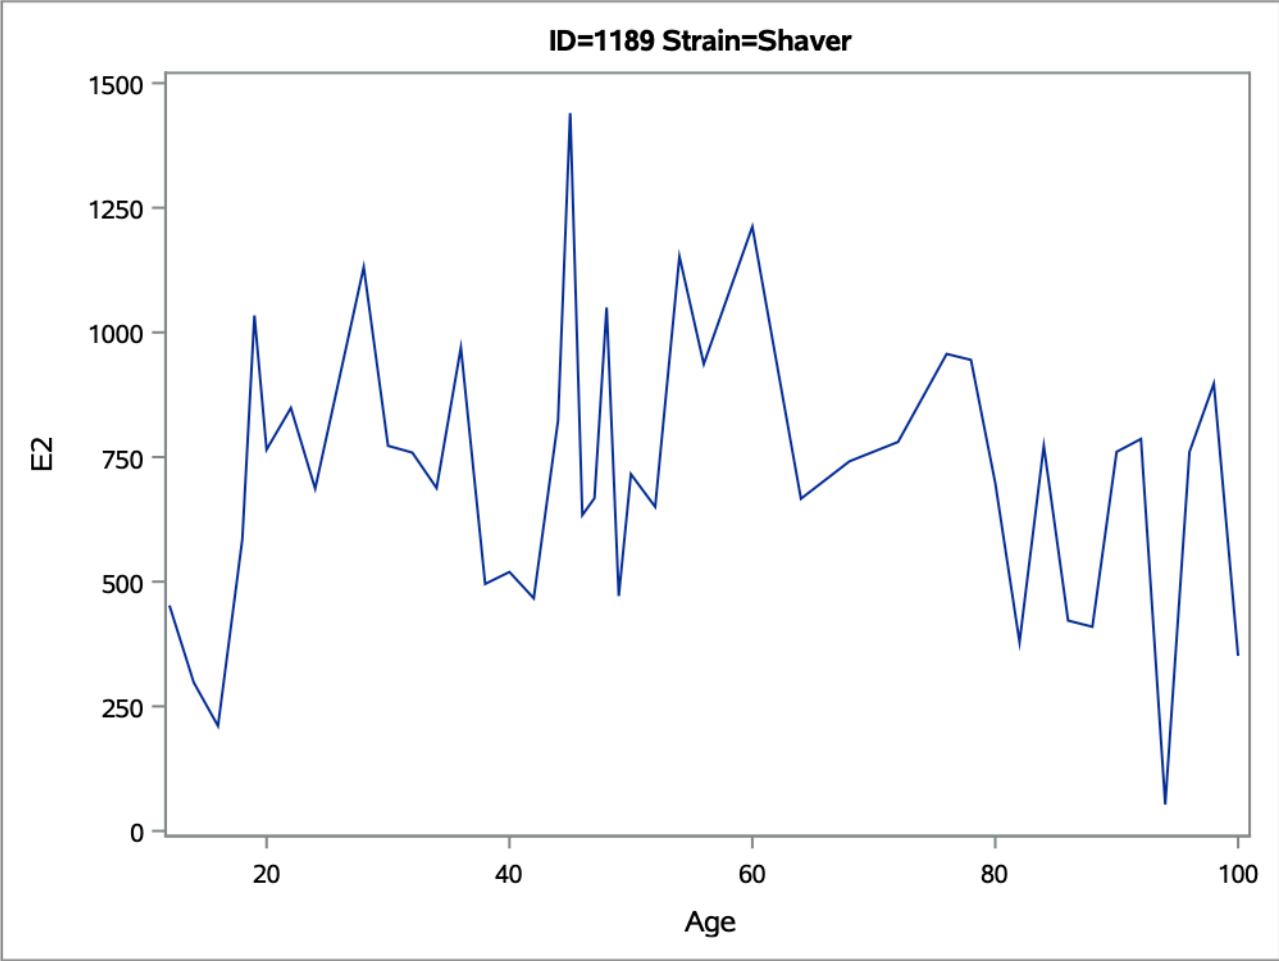

ID=1191 Strain=Shaver

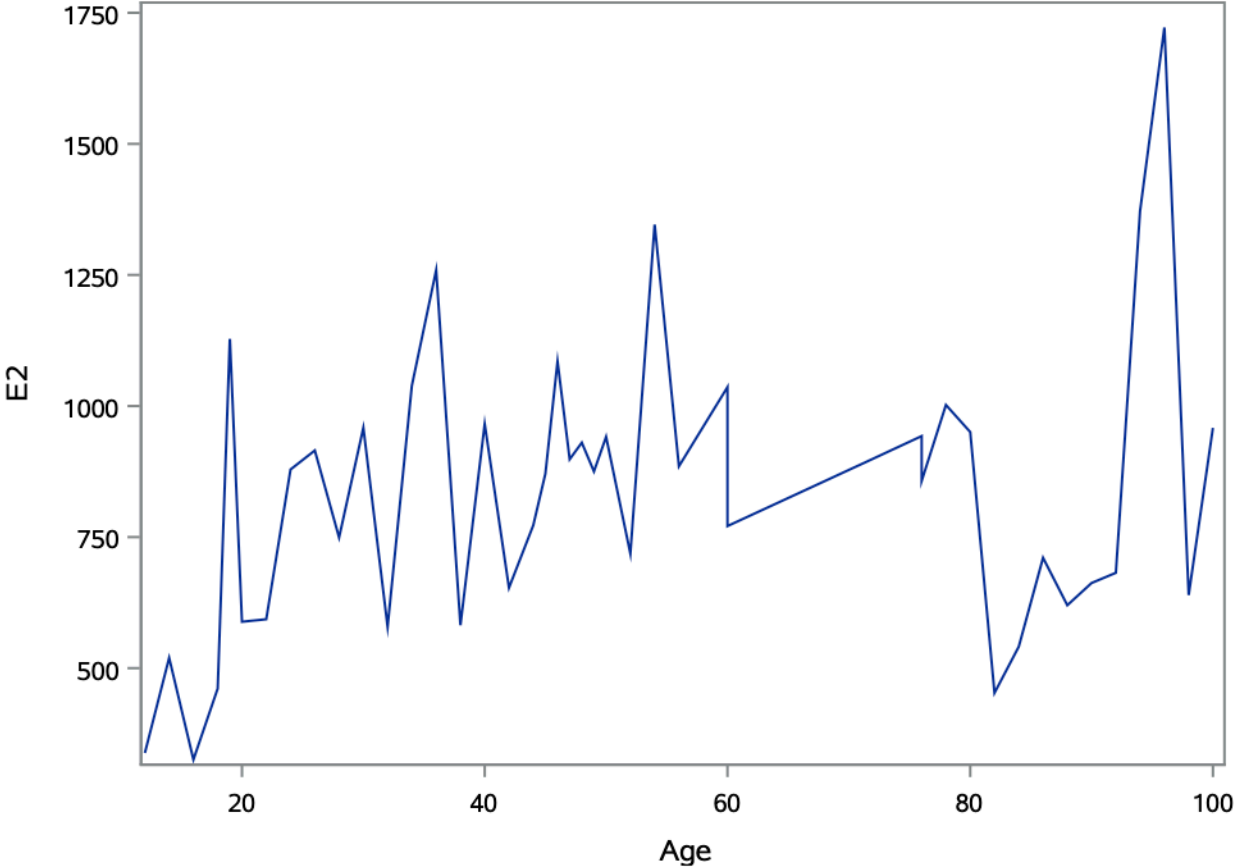

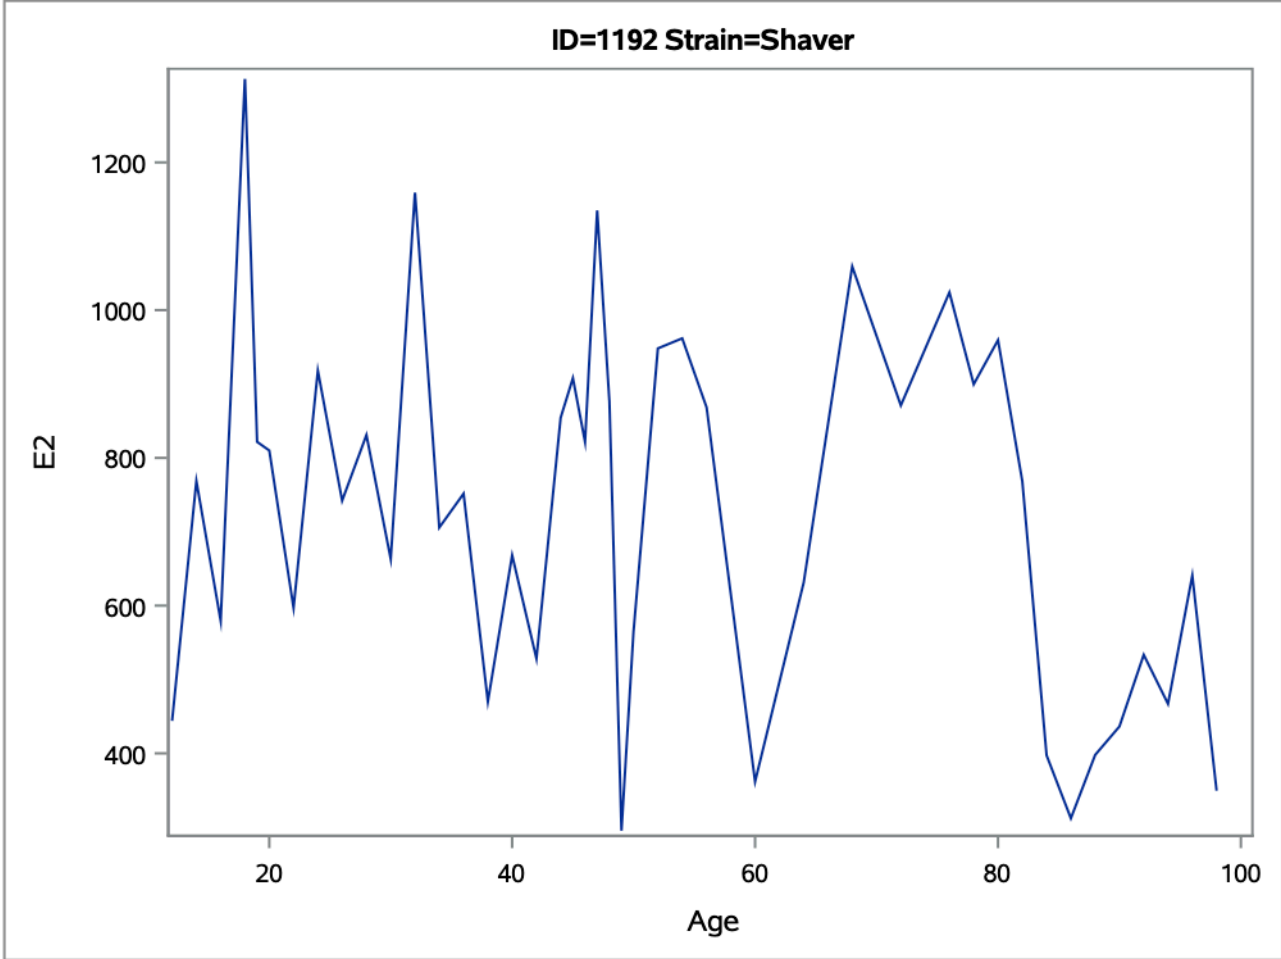

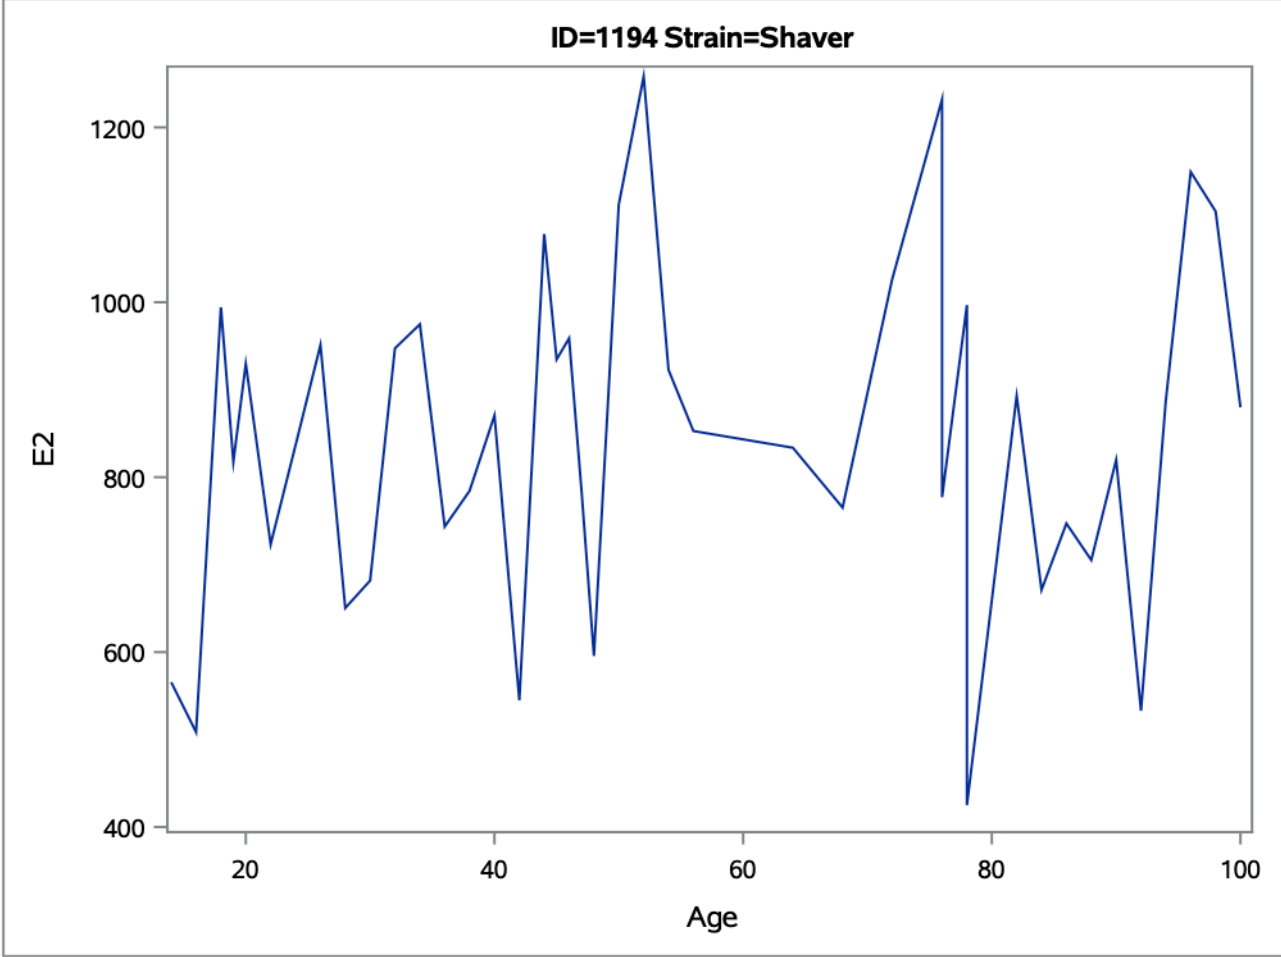



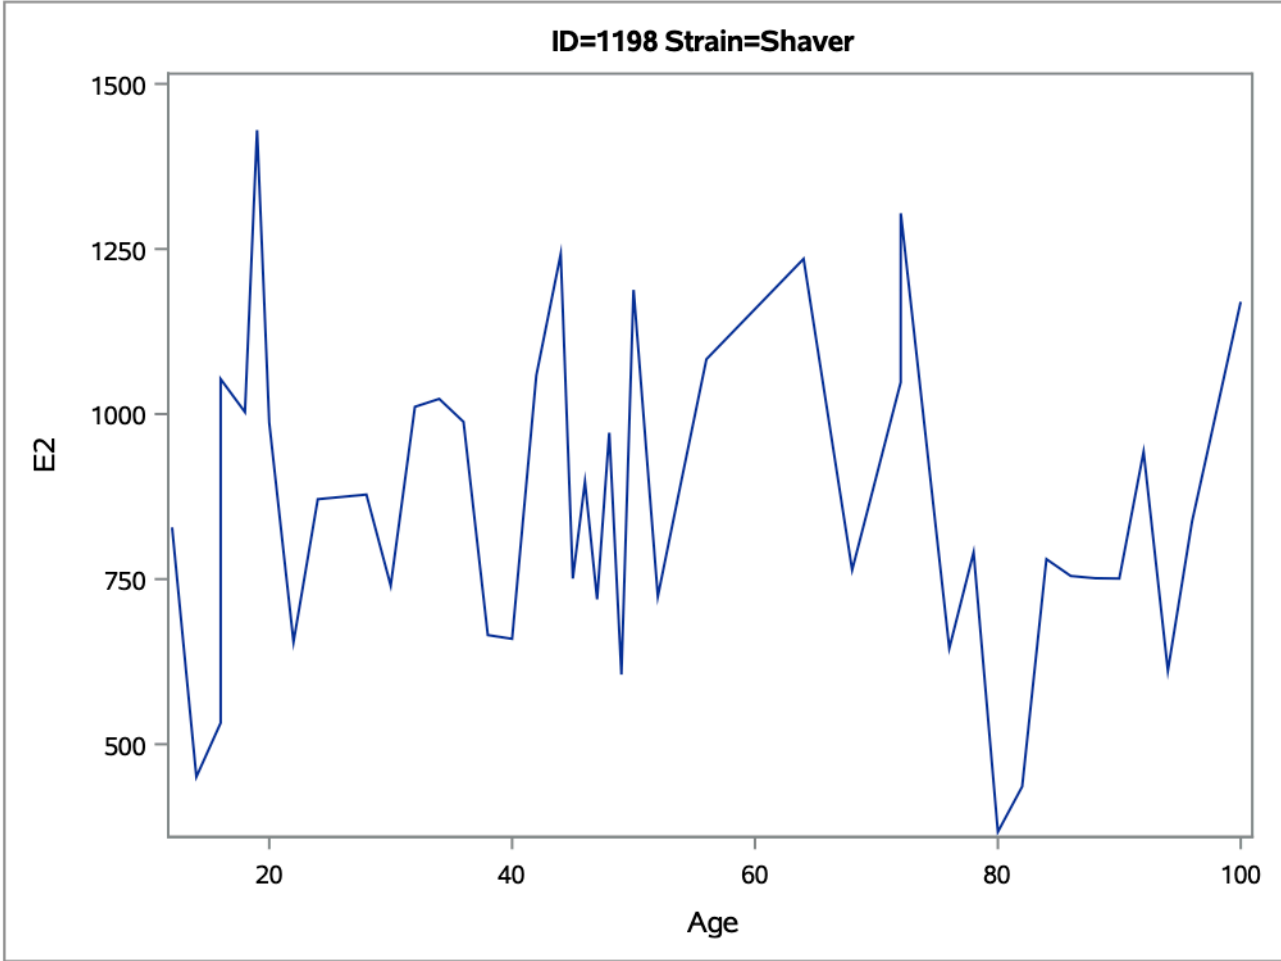

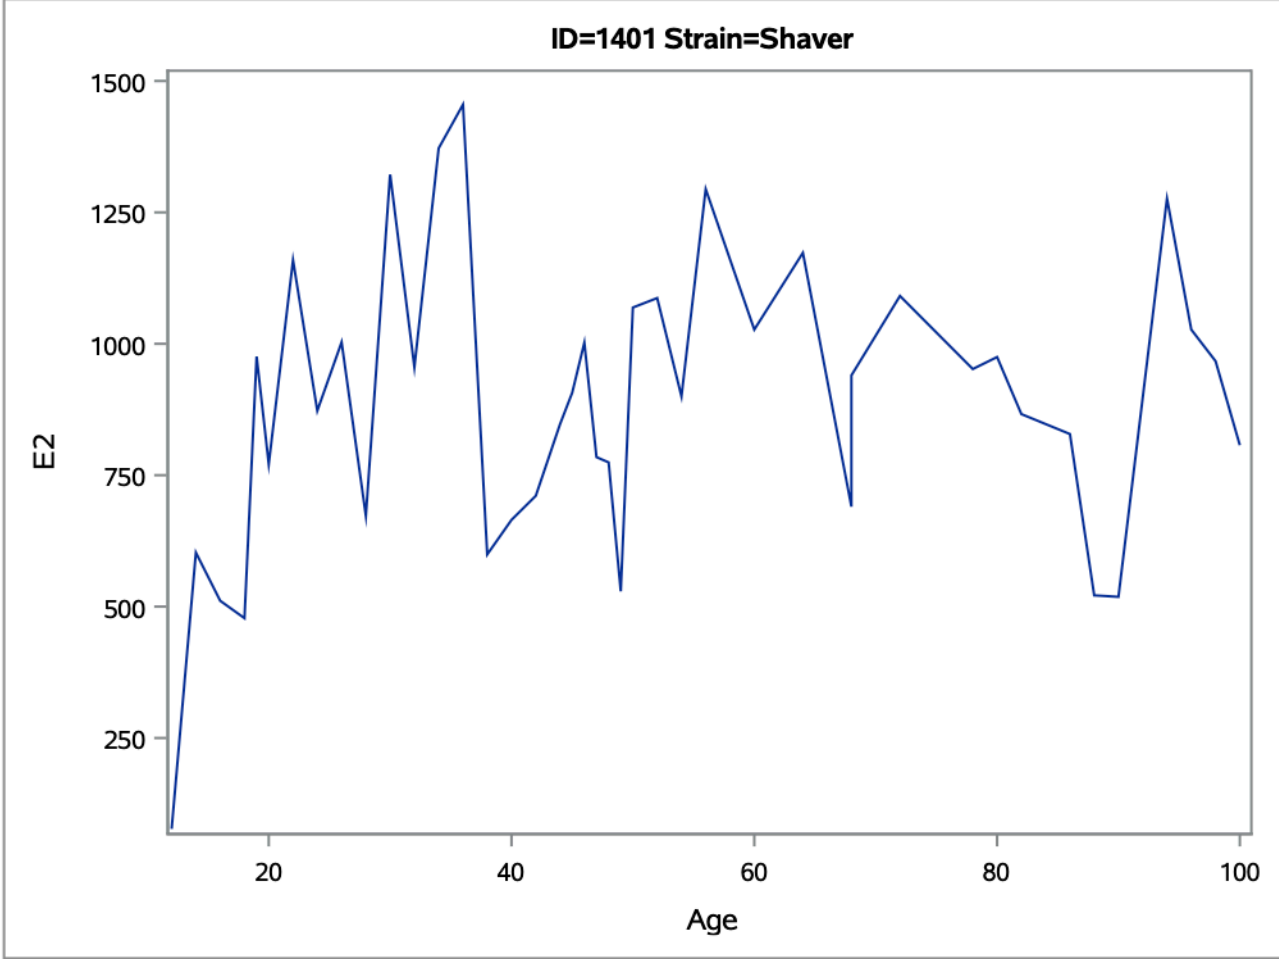

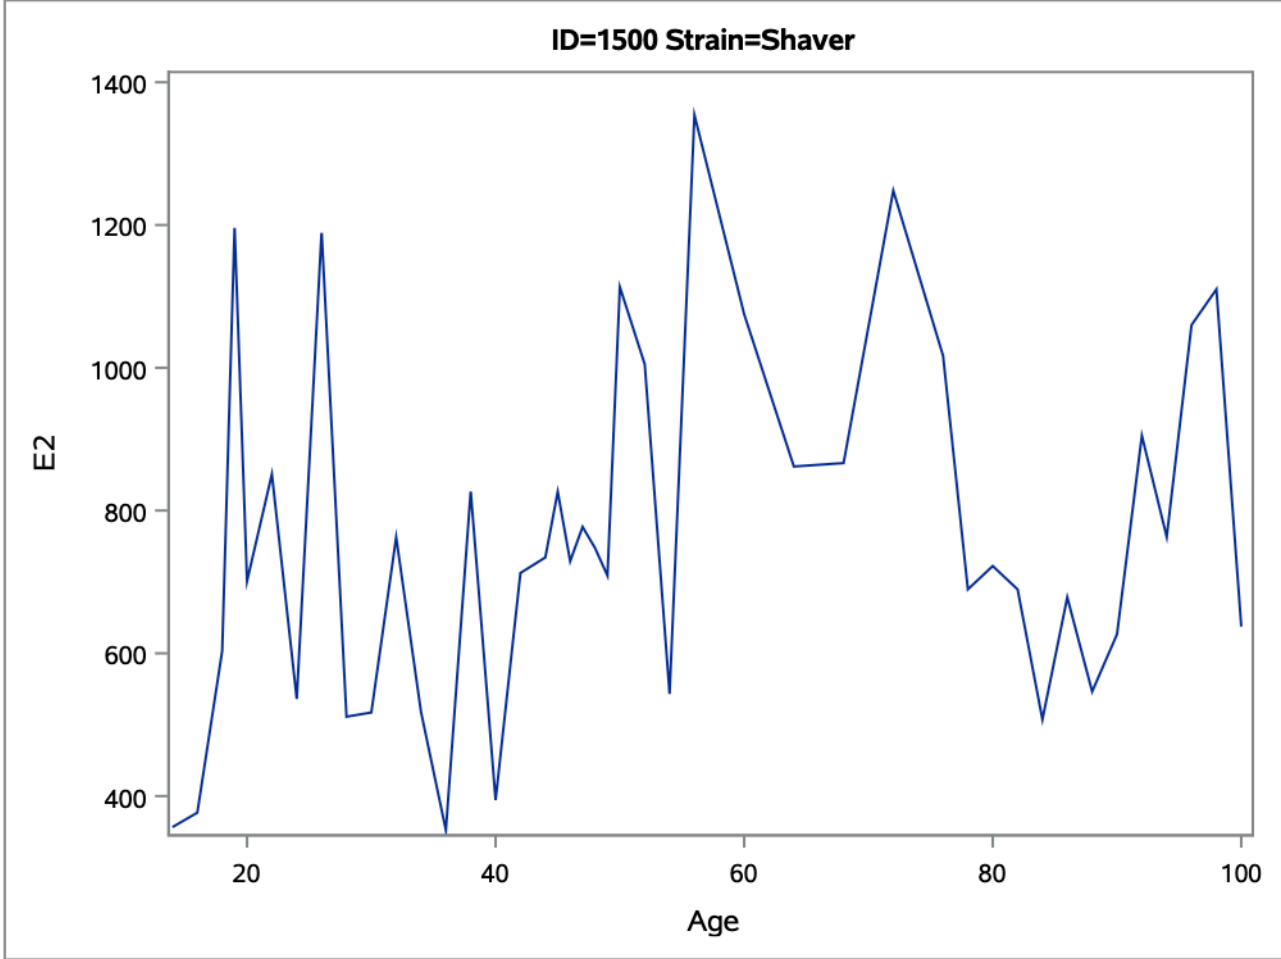

Supplement: Data_Sheet_1.pdf [file Data_Sheet_1.pdf]
